# Supplementary material
Source: publisher figshare collection journal article supplement (https://acs.figshare.com/ndownloader/files/34309105)
Supplement: Supplementary file 1 [file 34309105]

## Sheet: Total
Table S7. List of identified O-GlcNAc sites in SW480 cells and SW620 cells.
Proteins	O-GlcNAc sites	Gene names	Localization prob (Rep. 1) in SW480	Localization prob (Rep. 2) in SW480	Localization prob (Rep. 3) in SW480	High-confidence sites in SW480 cells	Localization prob (Rep. 1) in SW620	Localization prob (Rep. 2) in SW620	Localization prob (Rep. 3) in SW620	High-confidence sites in SW620 cells	Reported
U3KPZ7;Q9P2N5	407;407	RBM27	0.999783	0.999904	0.982853	YES	NA	NA	0.999952	NO	yes
U3KPZ7;Q9P2N5	467;522	RBM27	0.789731	0.941402	0.916218	YES	NA	NA	NA	NO	yes
U3KPZ7;Q9P2N5	386;386	RBM27	1	0.999119	0.989999	YES	0.99988	0.997309	0.982904	YES	yes
U3KPZ7;Q9P2N5	491;546	RBM27	NA	0.984137	0.838258	YES	0.936533	NA	0.882763	YES	yes
U3KPZ7;Q9P2N5	683;738	RBM27	0.994924	0.910988	0.911343	YES	0.910764	0.925157	0.995227	YES	yes
U3KPZ7;Q9P2N5	484;539	RBM27	0.998743	NA	0.999272	YES	0.984752	NA	NA	NO	yes
Q9Y6Y8	118	SEC23IP	0.94822	0.940779	0.917252	YES	NA	NA	NA	NO	yes
Q9Y6Y8	123	SEC23IP	0.996754	0.991797	0.886144	YES	0.999336	0.964677	0.93014	YES	yes
Q9Y6Y8	124	SEC23IP	0.978569	0.962015	0.905992	YES	0.994102	0.992191	0.939393	YES	yes
Q9Y6Y8	138	SEC23IP	0.976565	0.997871	0.996204	YES	0.999735	0.99978	0.995454	YES	yes
Q9Y6X8	265	ZHX2	NA	0.996712	0.91307	YES	0.930358	0.998973	0.994512	YES	yes
Q9Y618	1821	NCOR2	NA	0.902343	0.97725	YES	0.815585	0.816878	NA	YES	no
Q9Y618	1997	NCOR2	0.999994	0.998299	1	YES	1	0.999808	1	YES	yes
Q9Y618	2142	NCOR2	1	0.999988	NA	YES	1	1	0.999935	YES	yes
Q9Y520	2245	PRRC2C	NA	0.872534	0.820028	YES	NA	NA	NA	NO	yes
Q9Y520	2211	PRRC2C	0.949341	NA	0.889819	YES	NA	NA	NA	NO	yes
Q9Y520	2196	PRRC2C	NA	0.985953	0.812203	YES	0.900605	0.856972	0.885414	YES	yes
Q9Y520	2243	PRRC2C	0.955459	0.996199	0.949847	YES	0.939768	0.937042	0.848858	YES	yes
Q9Y520	2691	PRRC2C	0.787733	NA	0.832734	YES	0.932809	0.90539	NA	YES	no
Q9Y3S1	1605	WNK2	0.923842	0.909177	0.951541	YES	0.917248	0.991337	0.862037	YES	yes
Q9Y2X9	61	ZNF281	0.989575	0.915967	NA	YES	0.983432	0.915967	0.930265	YES	yes
Q9UPN9	634	TRIM33	0.940245	0.999981	0.998495	YES	0.991699	0.999425	0.999511	YES	yes
Q9UPN6	615	SCAF8	0.931209	0.988144	0.923181	YES	0.995206	0.999608	0.97319	YES	yes
Q9UPN6	821	SCAF8	0.998383	NA	0.999164	YES	0.999988	0.999992	0.999992	YES	yes
Q9UPN3	542	MACF1	NA	0.888674	0.988531	YES	NA	NA	NA	NO	no
Q9UNW1	244	MINPP1	1	1	NA	YES	1	1	1	YES	yes
Q9ULU4	751	ZMYND8	0.917497	NA	0.935667	YES	0.987916	0.931811	0.994597	YES	yes
Q9ULU4	750	ZMYND8	0.9317	0.931698	0.980639	YES	0.899701	NA	NA	NO	yes
Q9ULT8	1350	HECTD1	0.999934	0.999906	0.995953	YES	0.999868	0.832887	0.999868	YES	yes
Q9ULM3	604	YEATS2	0.999999	0.998716	0.999999	YES	0.999999	1	1	YES	yes
Q9ULJ3	447	ZBTB21	1	1	0.998778	YES	NA	NA	NA	NO	yes
Q9ULH7	207	MKL2	NA	0.752681	0.933257	YES	NA	NA	0.843505	NO	yes
Q9UKD1	403	GMEB2	0.990222	0.90737	0.999438	YES	0.913305	0.907867	0.923655	YES	yes
Q9UK61	1124	FAM208A	0.999263	0.993797	0.996596	YES	0.999218	0.999651	0.999831	YES	yes
Q9UJX2	565	CDC23	0.971476	0.978148	NA	YES	NA	NA	NA	NO	yes
Q9UIU6	426	SIX4	0.897233	0.975794	0.911102	YES	NA	NA	NA	NO	yes
Q9UHY1	532	NRBP1	0.935825	0.996821	0.996056	YES	NA	NA	NA	NO	yes
Q9UHR5	236	SAP30BP	0.851406	0.871651	0.863618	YES	NA	NA	NA	NO	yes
Q9UHR5	233	SAP30BP	NA	0.923681	0.974611	YES	0.956538	0.993933	0.891233	YES	yes
Q9UHR5	237	SAP30BP	0.77547	NA	0.891173	YES	0.872926	0.819177	NA	YES	yes
Q9UHD9	113	UBQLN2	0.863029	NA	0.761944	YES	0.936796	0.874779	0.829664	YES	yes
Q9UH99	634	SUN2	0.999894	0.991317	0.999677	YES	0.999874	0.999994	0.999085	YES	yes
Q9UGU0	240	TCF20	0.870363	0.778657	0.923928	YES	NA	NA	NA	NO	yes
Q9UBV2	610	SEL1L	0.999888	0.999906	0.930969	YES	0.831502	NA	0.999985	YES	yes
Q9P2R6	1238	RERE	0.890728	0.837231	NA	YES	0.914713	0.854055	NA	YES	yes
Q9P2N6	796	KANSL3	0.99802	0.998373	0.966889	YES	0.999179	0.998213	0.995413	YES	yes
Q9P2N6	797	KANSL3	NA	0.978092	0.881231	YES	0.972439	0.959935	0.957565	YES	yes
Q9P2N6	719	KANSL3	0.880667	NA	0.843591	YES	0.840174	NA	NA	NO	yes
Q9P265	225	DIP2B	NA	0.830094	0.819828	YES	NA	NA	NA	NO	no
Q9NZN8	114	CNOT2	NA	0.858657	0.846675	YES	0.872195	NA	NA	NO	yes
Q9NZM4	430	GLTSCR1	NA	0.996973	0.959627	YES	0.910785	NA	NA	NO	no
Q9NZM3	210	ITSN2	0.774608	NA	0.995048	YES	0.999962	0.921851	NA	YES	yes
Q9NYV4	1363	CDK12	NA	0.997987	0.957213	YES	NA	0.988558	0.992862	YES	yes
Q9NYV4	1447	CDK12	0.791625	NA	0.926051	YES	NA	0.815916	NA	NO	no
Q9NYV4	592	CDK12	0.999951	0.999983	0.999997	YES	0.999982	0.959741	0.999963	YES	yes
Q9NYV4	593	CDK12	0.999463	0.999878	0.999977	YES	0.999742	0.959741	0.999749	YES	yes
Q9NYV4	597	CDK12	0.910678	0.934102	0.864766	YES	0.825547	0.866667	0.770266	YES	yes
Q9NXV6	349	CDKN2AIP	0.951698	0.955668	0.936911	YES	NA	0.998321	0.998946	YES	yes
Q9NTZ6	132	RBM12	NA	0.821483	0.828835	YES	NA	NA	NA	NO	yes
Q9NTZ6	124	RBM12	0.803417	NA	0.968673	YES	NA	0.880013	NA	NO	yes
Q9NTZ6	135	RBM12	0.794655	NA	0.953447	YES	NA	NA	NA	NO	yes
Q9NTZ6	121	RBM12	0.8657	0.789248	0.955917	YES	0.817103	0.883112	0.805843	YES	yes
Q9NTZ6	122	RBM12	0.929464	0.898297	0.955917	YES	0.817103	NA	0.892175	YES	yes
Q9NTZ6	139	RBM12	0.976905	0.94473	0.829411	YES	0.844035	NA	NA	NO	yes
Q9NR12	196	PDLIM7	1	0.999984	1	YES	NA	0.997985	1	YES	yes
Q9NR12	105	PDLIM7	1	0.999998	NA	YES	0.999985	0.999912	0.999998	YES	yes
Q9NR12	89	PDLIM7	1	1	1	YES	1	1	1	YES	yes
Q9HDC9	162	APMAP	1	1	1	YES	1	1	1	YES	yes
Q9HBM6	165	TAF9B	0.908957	0.882204	NA	YES	NA	NA	NA	NO	yes
Q9HBM6	153	TAF9B	NA	0.89573	0.946842	YES	0.791448	NA	NA	NO	yes
Q9HBD1	593	RC3H2	1	1	1	YES	1	1	1	YES	yes
Q9HAU0	382	PLEKHA5	1	1	1	YES	1	1	1	YES	yes
Q9H4I2	240	ZHX3	0.992137	0.981253	0.977707	YES	NA	0.853055	0.991346	YES	yes
Q9H4I2	735	ZHX3	1	1	1	YES	1	1	1	YES	yes
Q9H4G0	794	EPB41L1	0.993518	0.931907	0.995062	YES	NA	NA	NA	NO	yes
Q9H4A3	1950	WNK1	0.911186	0.814208	NA	YES	NA	NA	NA	NO	yes
Q9H4A3	2382	WNK1	0.928738	NA	0.819312	YES	NA	0.910604	NA	NO	yes
Q9H4A3	1863	WNK1	1	NA	1	YES	1	1	1	YES	yes
Q9H2Y7	1492	ZNF106	NA	0.999976	0.999865	YES	1	1	1	YES	yes
Q9H1B7	7	IRF2BPL	0.984021	NA	0.978511	YES	NA	NA	NA	NO	no
Q9H1B7	8	IRF2BPL	0.95719	NA	0.976551	YES	NA	NA	NA	NO	no
Q9H1B7	179	IRF2BPL	0.999998	0.999927	0.999986	YES	0.999999	0.999994	1	YES	yes
Q9H0E9	284	BRD8	0.819517	NA	0.756882	YES	NA	NA	NA	NO	yes
Q9H0E3	305	SAP130	0.879719	NA	0.933571	YES	NA	NA	0.897126	NO	yes
Q9H0E3	300	SAP130	0.999634	0.999972	0.99968	YES	0.999338	0.999995	NA	YES	no
Q9H0E3	306	SAP130	0.90662	0.994778	0.982637	YES	0.997925	0.914362	0.985083	YES	yes
Q9H0E3	327	SAP130	0.993	0.942799	0.991902	YES	0.989667	0.995677	0.996471	YES	yes
Q9C0D7	528	ZC3H12C	0.97279	0.959069	NA	YES	NA	NA	NA	NO	yes
Q9C0D5	1477	TANC1	0.999939	0.999998	0.999961	YES	0.994765	NA	1	YES	no
Q9C0C7	440	AMBRA1	1	1	1	YES	1	0.999999	0.999984	YES	yes
Q9C0C7	441	AMBRA1	0.999989	0.999999	0.999989	YES	0.999933	0.999906	0.999782	YES	yes
Q9BYJ9	196	YTHDF1	0.989814	0.974117	NA	YES	0.995207	0.902496	0.94687	YES	yes
Q9BWF3	285	RBM4	NA	0.997189	0.883994	YES	NA	0.829787	NA	NO	yes
Q9BWF3	297	RBM4	0.857673	NA	0.898877	YES	NA	0.820459	0.893332	YES	yes
Q9BTC0	1288	DIDO1	0.96238	0.902585	0.91917	YES	NA	0.952601	0.98444	YES	yes
Q9BTC0	1291	DIDO1	0.910851	0.901907	0.796865	YES	NA	0.998951	0.859073	YES	yes
Q9BTC0	1292	DIDO1	0.888058	0.855867	0.858532	YES	NA	0.998951	0.859073	YES	yes
Q9BQC3	470	DPH2	0.992297	NA	0.923749	YES	NA	NA	NA	NO	yes
Q99856	408	ARID3A	0.999017	1	1	YES	1	1	0.999999	YES	yes
Q99700	216	ATXN2	0.759715	NA	0.990637	YES	0.782209	NA	NA	NO	yes
Q96T58	2810	SPEN	0.943755	NA	0.956171	YES	NA	0.899443	0.937697	YES	yes
Q96T58	2522	SPEN	0.999999	1	1	YES	1	1	1	YES	yes
Q96T58	2525	SPEN	0.890513	0.999114	NA	YES	0.833856	0.998087	NA	YES	yes
Q96T58	2591	SPEN	0.913207	0.833437	0.876014	YES	0.999908	0.987391	NA	YES	yes
Q96T58	2921	SPEN	0.973594	0.945106	NA	YES	0.931508	0.770971	NA	YES	yes
Q96T58	2471	SPEN	0.908998	0.998485	0.891537	YES	0.996963	NA	NA	NO	yes
Q96S52	368	PIGS	0.999204	0.999631	0.999788	YES	0.992453	0.994053	0.999742	YES	yes
Q96RN5	405	MED15	0.941719	0.940747	NA	YES	0.943826	0.930252	NA	YES	yes
Q96PK6	278	RBM14	NA	0.97867	0.906128	YES	NA	0.978469	0.921363	YES	yes
Q96PK6	225	RBM14	0.998247	NA	0.998848	YES	NA	0.998001	NA	NO	yes
Q96PK6	521	RBM14	0.848701	0.851957	0.949675	YES	NA	0.878977	NA	NO	yes
Q96PK6	244	RBM14	0.938554	0.942754	0.951629	YES	0.973746	NA	0.996436	YES	yes
Q96PK6	254	RBM14	NA	0.999999	0.999999	YES	0.999973	NA	NA	NO	yes
Q96PK6	280	RBM14	0.908579	0.955955	0.933246	YES	0.992885	NA	NA	NO	yes
Q96MY1	375	NOL4L	0.932336	0.99267	NA	YES	0.997902	0.917529	0.990773	YES	yes
Q96L91	2728	EP400	NA	0.997326	0.826142	YES	NA	0.965559	0.994442	YES	yes
Q96L91	2605	EP400	0.957053	0.98261	0.999235	YES	NA	NA	NA	NO	yes
Q96L91	1488	EP400	NA	0.997468	0.977494	YES	0.996148	0.999999	0.999996	YES	yes
Q96L91	2604	EP400	0.894028	0.982542	0.999997	YES	0.998498	0.879141	NA	YES	yes
Q96L91	2700	EP400	0.936588	0.988398	0.860585	YES	0.990738	0.994309	0.944462	YES	yes
Q96L91	2710	EP400	0.994308	0.984858	NA	YES	0.9304	NA	0.898003	YES	yes
Q96KR1	180	ZFR	0.940015	0.998853	0.999988	YES	NA	0.989427	0.971309	YES	yes
Q96KR1	470	ZFR	0.939603	0.930519	NA	YES	NA	0.926237	NA	NO	no
Q96KR1	114	ZFR	0.990196	0.986876	0.962707	YES	0.98676	NA	0.999213	YES	yes
Q96KR1	135	ZFR	1	1	1	YES	1	1	1	YES	yes
Q96KR1	136	ZFR	1	1	1	YES	1	1	1	YES	yes
Q96KR1	195	ZFR	1	1	0.999969	YES	1	1	0.999999	YES	yes
Q96KR1	202	ZFR	0.902373	0.989981	0.999996	YES	0.993649	NA	0.990683	YES	yes
Q96KR1	300	ZFR	0.998639	0.999987	0.999873	YES	0.999926	0.999997	0.999996	YES	yes
Q96KR1	423	ZFR	0.923051	0.898069	0.947235	YES	0.856636	0.900541	0.943626	YES	yes
Q96KR1	529	ZFR	0.90178	0.89798	NA	YES	0.938542	0.871794	0.896276	YES	yes
Q96JN0	37	LCOR	0.986867	0.992036	NA	YES	0.99174	0.812356	NA	YES	no
Q96HC4	110	PDLIM5	0.997594	0.992601	0.990645	YES	0.990017	0.999292	0.991897	YES	yes
Q96HC4	115	PDLIM5	1	1	1	YES	0.999999	1	0.999999	YES	yes
Q96HC4	319	PDLIM5	0.858477	0.929685	0.91106	YES	0.971637	NA	0.834371	YES	yes
Q96BD5	270	PHF21A	0.974192	0.995224	0.843029	YES	0.919787	0.85553	NA	YES	yes
Q96BD5	277	PHF21A	0.922597	0.932253	0.996644	YES	0.940235	0.819628	0.994163	YES	yes
Q93052	11	LPP	0.991941	0.994891	NA	YES	0.896769	0.933229	0.959337	YES	yes
Q92945	191	KHSRP	NA	0.999487	0.997554	YES	NA	0.901301	0.905001	YES	yes
Q92917	12	GPKOW	0.999991	1	0.999996	YES	NA	NA	1	NO	yes
Q92841	55	DDX17	1	0.999956	0.999996	YES	0.998951	0.857076	NA	YES	yes
Q92615	589	LARP4B	0.977163	0.835551	NA	YES	NA	NA	NA	NO	yes
Q92540	627	SMG7	0.986441	0.996641	0.958032	YES	0.985913	0.993108	0.993108	YES	yes
Q8WWM7	500	ATXN2L	1	0.999997	NA	YES	NA	0.999999	1	YES	yes
Q8TEQ6	616	GEMIN5	0.932564	0.927496	0.932115	YES	NA	NA	NA	NO	yes
Q8TDM6	1186	DLG5	NA	0.845089	0.963186	YES	NA	0.999146	0.899095	YES	yes
Q8TCU4	1512	ALMS1	0.902488	0.892188	NA	YES	NA	NA	0.766874	NO	yes
Q8TCU4	1567	ALMS1	0.788558	NA	0.892194	YES	NA	NA	NA	NO	no
Q8TCJ2	625	STT3B	0.986438	0.993387	NA	YES	NA	NA	0.933695	NO	yes
Q8TCJ2	629	STT3B	0.954971	NA	0.937256	YES	0.992232	NA	0.962257	YES	no
Q8NG31	714	CASC5	NA	0.977494	0.998838	YES	0.911996	0.979715	NA	YES	yes
Q8NFQ8	288	TOR1AIP2	0.985414	0.990236	NA	YES	NA	NA	NA	NO	yes
Q8NEZ2	174	VPS37A	NA	0.999978	0.88887	YES	NA	0.857447	NA	NO	yes
Q8NEY1	534	NAV1	0.999984	0.997343	NA	YES	NA	NA	0.880578	NO	no
Q8NDV7	1671	TNRC6A	NA	0.985333	0.919402	YES	NA	0.802905	0.883964	YES	yes
Q8NDV7	1688	TNRC6A	0.969437	0.987024	0.937418	YES	NA	NA	0.989445	NO	yes
Q8NDV7	1666	TNRC6A	NA	0.902689	0.852236	YES	0.853114	0.802648	0.818668	YES	no
Q8NDV7	1687	TNRC6A	0.759167	0.954441	0.938928	YES	0.905747	NA	0.959686	YES	yes
Q8NDV7	1712	TNRC6A	0.907739	0.989505	NA	YES	0.924774	0.921828	NA	YES	yes
Q8N655	626	C10orf12	NA	0.92052	0.897247	YES	0.923607	NA	NA	NO	yes
Q8N3X1	794	FNBP4	NA	0.998457	0.90499	YES	NA	NA	NA	NO	yes
Q8N3X1	797	FNBP4	0.867356	NA	0.990982	YES	0.952643	0.998587	NA	YES	yes
Q8N3V7	409	SYNPO	0.964643	0.891088	0.884211	YES	NA	NA	NA	NO	yes
Q8N1I0	1797	DOCK4	0.99243	0.985915	0.99818	YES	0.999895	0.986716	0.98835	YES	yes
Q8IZL8	705	PELP1	NA	0.984156	0.857412	YES	0.955819	0.906669	0.902088	YES	yes
Q8IZD4	518	DCP1B	NA	0.94837	0.929508	YES	NA	NA	NA	NO	yes
Q8IZ21	203	PHACTR4	NA	0.750409	0.809049	YES	NA	NA	NA	NO	yes
Q8IZ21	201	PHACTR4	0.929261	0.846365	NA	YES	0.761524	0.998639	0.999957	YES	yes
Q8IZ21	202	PHACTR4	0.884929	0.846365	NA	YES	0.902396	0.985592	0.999516	YES	yes
Q8IY33	309	MICALL2	0.875124	NA	0.963736	YES	NA	0.867107	NA	NO	yes
Q8IWZ3	1803	ANKHD1	NA	0.954349	0.960051	YES	0.935747	0.960053	0.996276	YES	yes
Q8IWI9	1557	MGA	0.972987	0.992521	0.991026	YES	0.999815	0.999766	0.995799	YES	yes
Q8IWI9	1664	MGA	0.960043	0.951787	NA	YES	0.949371	0.833307	0.87713	YES	yes
Q8IWI9	1672	MGA	0.999446	0.986564	0.975672	YES	0.99245	0.90971	0.999202	YES	yes
Q8IWI9	1872	MGA	0.997413	0.999695	0.97191	YES	0.992522	0.999971	0.998543	YES	yes
Q8IWI9	1561	MGA	0.910746	NA	0.999125	YES	0.928934	NA	NA	NO	no
Q8IWB9	176	TEX2	0.922393	NA	0.941663	YES	0.988863	0.871378	0.943682	YES	yes
Q8IVW6	408	ARID3B	NA	0.999195	0.999982	YES	NA	1	1	YES	yes
Q86VF7	205	NRAP	0.925379	0.944879	NA	YES	NA	NA	NA	NO	no
Q86UE4	492	MTDH	0.782333	0.983412	NA	YES	NA	0.756251	NA	NO	yes
Q86T24	257	ZBTB33	0.999977	NA	0.998596	YES	NA	NA	NA	NO	yes
Q7Z739	224	YTHDF3	NA	0.894315	0.802087	YES	NA	NA	NA	NO	yes
Q7Z739	229	YTHDF3	NA	0.817885	0.894321	YES	NA	NA	NA	NO	yes
Q7Z739	167	YTHDF3	0.999984	1	NA	YES	NA	0.999999	0.999949	YES	yes
Q7Z739	205	YTHDF3	1	1	1	YES	1	1	1	YES	yes
Q7Z6Z7	3116	HUWE1	0.816529	0.862743	NA	YES	NA	NA	NA	NO	no
Q7Z6Z7	3118	HUWE1	0.769269	NA	0.847645	YES	NA	NA	NA	NO	yes
Q7Z6J0	505	SH3RF1	1	1	1	YES	NA	1	1	YES	yes
Q7Z5L9	212	IRF2BP2	NA	0.762204	0.883033	YES	NA	0.834012	0.943997	YES	yes
Q7Z589	534	EMSY	NA	0.959332	0.952525	YES	NA	NA	NA	NO	yes
Q7Z589	1098	EMSY	0.998215	0.965854	0.999391	YES	NA	0.997153	0.989841	YES	yes
Q7Z589	232	EMSY	0.971163	0.903111	NA	YES	NA	NA	NA	NO	yes
Q7Z589	283	EMSY	0.931857	0.907188	0.992647	YES	NA	NA	NA	NO	yes
Q7Z589	556	EMSY	0.926186	0.954489	NA	YES	NA	0.950859	NA	NO	yes
Q7Z589	1120	EMSY	0.941511	0.992186	0.99999	YES	0.99939	0.999722	0.999963	YES	yes
Q7Z589	264	EMSY	0.893927	0.996815	0.803586	YES	0.941941	0.949092	0.940065	YES	yes
Q7Z589	282	EMSY	0.994973	0.990295	0.999327	YES	0.945175	0.875296	0.967819	YES	yes
Q7Z589	501	EMSY	0.99992	0.999412	0.999849	YES	0.999801	0.999734	0.999651	YES	yes
Q7Z589	506	EMSY	0.996588	0.999847	0.984299	YES	0.995003	0.978661	0.964318	YES	yes
Q7Z434	307	MAVS	1	1	1	YES	1	NA	1	YES	yes
Q7Z417	380	NUFIP2	NA	0.890666	0.876864	YES	NA	NA	NA	NO	yes
Q7Z3T8	626	ZFYVE16	0.906552	0.940787	0.999252	YES	0.996536	0.997623	0.998971	YES	yes
Q7Z3K3	244	POGZ	NA	0.870808	0.991701	YES	NA	NA	NA	NO	yes
Q7Z3K3	361	POGZ	0.892289	NA	0.996501	YES	NA	0.997357	0.994383	YES	yes
Q7Z3K3	297	POGZ	0.997861	0.935547	NA	YES	0.967522	NA	NA	NO	yes
Q7Z3J3;A6NKT7;Q99666;O14715;P49792	919;919;918;918;1894	RGPD4;RGPD3;RGPD5;RGPD8;RANBP2	0.99867	0.999883	0.999994	YES	NA	0.978169	0.999993	YES	yes
Q7Z3J3;A6NKT7;Q99666;O14715;P0DJD0;P0DJD1;P49792	978;978;977;977;962;970;1953	RGPD4;RGPD3;RGPD5;RGPD8;RGPD1;RGPD2;RANBP2	0.944657	NA	0.917218	YES	NA	0.999663	0.849211	YES	no
Q7Z3J3;A6NKT7;Q99666;O14715;P0DJD0;P0DJD1	1505;1505;1504;1504;1489;1497	RGPD4;RGPD3;RGPD5;RGPD8;RGPD1;RGPD2	NA	0.808778	0.994115	YES	NA	NA	NA	NO	no
Q7LBC6	409	KDM3B	0.955127	0.97101	0.990143	YES	NA	NA	0.849156	NO	yes
Q7LBC6	420	KDM3B	0.997569	0.979309	0.993587	YES	0.985614	0.906957	0.978953	YES	yes
Q7LBC6	425	KDM3B	0.999999	0.999835	0.999992	YES	0.99986	0.985945	0.985503	YES	yes
Q7LBC6	426	KDM3B	0.999999	0.999831	0.999992	YES	0.999795	0.985752	0.985169	YES	yes
Q7LBC6	654	KDM3B	0.986868	0.857127	0.996777	YES	0.998428	NA	0.979271	YES	yes
Q7KZ85	1526	SUPT6H	0.871775	NA	0.830591	YES	0.882269	NA	0.924216	YES	yes
Q76L83	411	ASXL2	0.998879	0.9329	0.991011	YES	0.99286	NA	0.993266	YES	yes
Q70E73	784	RAPH1	0.999728	0.999728	0.999769	YES	NA	NA	NA	NO	yes
Q6ZU65	1003	UBN2	0.995531	0.987323	0.997425	YES	0.999113	0.889844	0.999465	YES	yes
Q6ZU65	1007	UBN2	0.869177	0.792939	NA	YES	0.957303	0.786078	0.812448	YES	yes
Q6Y7W6	680	GIGYF2	0.999829	0.999989	NA	YES	0.997274	1	0.999992	YES	yes
Q6WCQ1	178	MPRIP	0.999868	0.999749	0.999498	YES	0.999794	NA	NA	NO	yes
Q6W2J9	365	BCOR	0.997283	0.993842	0.999631	YES	0.99988	0.999879	0.998983	YES	yes
Q6W2J9	586	BCOR	0.998429	0.914344	0.992538	YES	0.904652	0.899633	0.989511	YES	yes
Q6VMQ6	834	ATF7IP	0.823276	0.990535	0.999999	YES	NA	0.999496	0.988673	YES	yes
Q6VMQ6	1066	ATF7IP	0.81159	0.897545	NA	YES	NA	NA	NA	NO	no
Q6VMQ6	706	ATF7IP	0.953631	0.973503	NA	YES	NA	NA	0.98624	NO	yes
Q6VMQ6	842	ATF7IP	0.999946	0.999943	0.993959	YES	NA	0.999988	NA	NO	yes
Q6VMQ6	719	ATF7IP	0.986381	0.985929	0.998531	YES	0.820463	0.962217	0.787601	YES	yes
Q6VMQ6	869	ATF7IP	0.924252	NA	0.899627	YES	0.933152	0.929534	0.892949	YES	yes
Q6VMQ6	914	ATF7IP	0.988429	0.99602	0.978084	YES	0.999996	0.999927	1	YES	yes
Q6PJT7	220	ZC3H14	1	1	1	YES	1	1	1	YES	yes
Q6PIU2	289	NCEH1	0.995357	0.999961	NA	YES	0.999438	0.996878	0.996939	YES	yes
Q6P4R8	881	NFRKB	0.957494	0.808987	NA	YES	NA	NA	NA	NO	yes
Q6P4R8	1141	NFRKB	1	0.999929	1	YES	0.999817	1	0.998522	YES	yes
Q6P4R8	1175	NFRKB	NA	0.93185	0.954642	YES	0.995458	0.964537	0.970494	YES	yes
Q6P4R8	1273	NFRKB	0.999781	0.998464	0.999842	YES	0.999556	0.999956	0.999234	YES	yes
Q6P4R8	841	NFRKB	0.984292	0.998342	0.999933	YES	0.98915	0.99806	0.999889	YES	yes
Q6P4R8	895	NFRKB	NA	0.914399	0.828355	YES	0.92433	NA	NA	NO	no
Q6MZP7	106	LIN54	NA	0.999581	0.937073	YES	0.98409	NA	0.929836	YES	yes
Q5VWN6	969	FAM208B	0.923181	0.9936	NA	YES	NA	0.871044	NA	NO	yes
Q5VWN6	1150	FAM208B	0.999914	0.999656	NA	YES	0.999964	NA	0.998881	YES	yes
Q5VTB9	53	RNF220	1	1	1	YES	NA	NA	NA	NO	yes
Q5VT52	396	RPRD2	0.759925	0.939109	NA	YES	NA	0.899135	NA	NO	yes
Q5VT52	399	RPRD2	0.950093	0.996469	0.996112	YES	0.937724	0.977576	0.995865	YES	yes
Q5VT52	400	RPRD2	0.994236	0.997775	0.999461	YES	0.949454	0.965476	0.989273	YES	yes
Q5VT52	422	RPRD2	0.962587	0.960686	NA	YES	0.992537	NA	0.974137	YES	yes
Q5VT52	501	RPRD2	NA	0.933027	0.977166	YES	0.818731	0.880013	0.941926	YES	yes
Q5VT52	991	RPRD2	0.91833	NA	0.994817	YES	0.993704	0.937026	0.918348	YES	yes
Q5T6F2	1004	UBAP2	NA	0.938463	0.995925	YES	NA	0.997898	NA	NO	yes
Q5JSZ5	1801	PRRC2B	0.916373	0.99966	0.912463	YES	NA	0.98748	NA	NO	yes
Q5JSZ5	1982	PRRC2B	0.99997	0.999999	0.999999	YES	1	0.997371	0.999941	YES	yes
Q5H9F3	641	BCORL1	0.999943	0.999926	0.999995	YES	NA	0.999982	NA	NO	no
Q5H9F3	652	BCORL1	0.914554	0.942068	0.904971	YES	0.935293	0.913489	NA	YES	yes
Q58A45	289	PAN3	0.966805	NA	0.928857	YES	NA	NA	NA	NO	yes
Q53ET0	504	CRTC2	0.999969	1	0.993646	YES	0.997863	NA	0.999852	YES	yes
Q52LR7	750	EPC2	0.895872	NA	0.918936	YES	0.9914	0.899767	0.964924	YES	yes
Q4KMP7	43	TBC1D10B	0.99261	0.995213	0.920483	YES	0.839808	NA	NA	NO	yes
Q2NL68	167	PROSER3	0.840946	0.935995	0.940879	YES	0.967421	NA	0.80885	YES	yes
Q2KHR3	105	QSER1	0.964094	NA	0.966751	YES	0.824919	NA	0.998635	YES	yes
Q2KHR3	1270	QSER1	0.978249	0.817061	NA	YES	0.993827	0.810648	NA	YES	yes
Q2KHR3	1271	QSER1	0.978261	0.887482	0.905799	YES	0.969072	NA	0.865688	YES	yes
Q2KHR3	306	QSER1	NA	0.879055	0.98169	YES	0.994228	0.985389	NA	YES	yes
Q2KHR3	74	QSER1	0.923004	0.912494	NA	YES	0.903933	0.813079	NA	YES	yes
Q2KHR3	959	QSER1	0.999944	0.9992	NA	YES	0.999979	0.999943	NA	YES	yes
Q2KHR2	342	RFX7	NA	0.93987	0.995385	YES	0.997142	0.993485	0.955558	YES	yes
Q16880	79	UGT8	0.905527	NA	0.986246	YES	0.856068	0.957785	0.997915	YES	yes
Q16760	81	DGKD	NA	1	1	YES	NA	NA	NA	NO	no
Q16760	87	DGKD	NA	1	1	YES	NA	NA	NA	NO	no
Q16594	207	TAF9	0.824235	0.857714	0.761493	YES	NA	0.987187	0.894669	YES	yes
Q16594	202	TAF9	0.990546	0.800041	0.867038	YES	0.860917	0.863147	NA	YES	yes
Q16186	221	ADRM1	NA	0.993463	0.925017	YES	0.935585	0.985287	0.851766	YES	yes
Q15942	169	ZYX	0.996805	0.997724	0.894966	YES	NA	NA	NA	NO	yes
Q15942	246	ZYX	0.999475	0.997684	0.999393	YES	NA	NA	NA	NO	yes
Q15911	353	ZFHX3	0.994145	0.994529	0.994682	YES	0.993907	0.999675	0.991685	YES	yes
Q15904	172	ATP6AP1	1	1	1	YES	1	1	1	YES	yes
Q15750	395	TAB1	0.971641	0.900767	0.98939	YES	0.982754	0.926904	0.937896	YES	yes
Q15654	158	TRIP6	0.899735	0.891516	NA	YES	NA	NA	NA	NO	yes
Q15652	1457	JMJD1C	0.911903	0.797078	0.963544	YES	NA	0.998628	0.942582	YES	yes
Q15637	328	SF1	0.999981	0.999987	0.999919	YES	0.999946	0.985648	NA	YES	yes
Q15293	55	RCN1	1	1	1	YES	NA	NA	0.999693	NO	yes
Q15155;P69849;Q5JPE7	620;620;620	NOMO1;NOMO3;NOMO2	NA	1	1	YES	1	NA	1	YES	yes
Q15149	638	PLEC	1	1	NA	YES	NA	1	NA	NO	yes
Q14686	1933	NCOA6	0.988119	0.941555	NA	YES	0.932589	NA	0.941555	YES	yes
Q14684	728	RRP1B	0.887806	0.949401	NA	YES	NA	NA	NA	NO	yes
Q14677	624	CLINT1	1	NA	1	YES	1	1	1	YES	yes
Q14671	797	PUM1	NA	0.956509	0.960055	YES	0.997486	0.960055	0.941935	YES	yes
Q14657	142	LAGE3	1	NA	1	YES	NA	NA	NA	NO	yes
Q14247	322	CTTN	0.835341	NA	0.813525	YES	NA	NA	NA	NO	no
Q14157	779	UBAP2L	NA	0.987491	0.979864	YES	NA	0.960927	0.976543	YES	yes
Q14157	439	UBAP2L	NA	0.994047	0.940846	YES	0.892244	0.999385	0.978888	YES	yes
Q14119	111	VEZF1	0.817077	0.854449	0.861456	YES	NA	0.846657	0.832574	YES	yes
Q14119	108	VEZF1	0.758941	0.847397	0.887081	YES	0.913106	NA	0.868188	YES	yes
Q14119	117	VEZF1	0.973055	0.999188	0.997185	YES	0.997865	0.998446	0.998068	YES	yes
Q14119	118	VEZF1	0.994607	0.999188	0.999277	YES	0.999896	0.999384	0.99948	YES	yes
Q14004	1287	CDK13	0.919384	0.985102	0.923544	YES	0.902317	0.925712	0.91309	YES	yes
Q13950	333	RUNX2	0.976056	0.998969	NA	YES	NA	NA	NA	NO	no
Q13586	170	STIM1	0.786019	0.960195	NA	YES	0.935649	0.883666	0.999746	YES	yes
Q13492;Q5T5P2	297;743	PICALM;KIAA1217	1	1	1	YES	1	1	0.999999	YES	yes
Q13492	356	PICALM	NA	0.894451	0.860163	YES	0.766427	NA	NA	NO	yes
Q13283	268	G3BP1	1	0.999996	0.999995	YES	0.999889	0.999613	0.999912	YES	yes
Q12830	2056	BPTF	0.90399	NA	0.892114	YES	NA	NA	NA	NO	yes
Q12830	2229	BPTF	0.998094	0.97479	NA	YES	0.887986	0.865977	0.864596	YES	yes
Q12830	2237	BPTF	0.907598	NA	0.995422	YES	0.999806	0.975731	0.999876	YES	yes
Q12797	454	ASPH	0.998163	0.998874	0.998867	YES	0.996962	0.997886	0.9969	YES	yes
Q09666	4917	AHNAK	NA	1	1	YES	NA	1	1	YES	yes
Q09666	247	AHNAK	1	NA	1	YES	NA	NA	NA	NO	yes
Q09666	5603	AHNAK	0.999881	0.999854	0.999701	YES	0.996372	0.999748	0.999641	YES	yes
Q07912	818	TNK2	0.803952	NA	0.870674	YES	NA	NA	NA	NO	no
Q07157	976	TJP1	0.95332	0.982084	NA	YES	NA	0.991683	0.975946	YES	yes
Q06546	264	GABPA	0.99999	NA	0.999943	YES	0.999981	NA	NA	NO	yes
Q05209	622	PTPN12	0.946491	NA	0.832546	YES	NA	0.807806	NA	NO	yes
Q04727	330	TLE4	1	1	1	YES	NA	NA	NA	NO	yes
Q04726	332	TLE3	0.969653	NA	0.991491	YES	NA	NA	NA	NO	yes
Q04637	61	EIF4G1	0.927225	0.995022	0.876252	YES	0.975468	0.921715	0.985124	YES	yes
Q01167	424	FOXK2	0.991745	0.999202	NA	YES	0.996801	0.999989	0.999894	YES	yes
Q01082	2297	SPTBN1	0.999975	NA	0.999829	YES	NA	0.967762	0.999997	YES	yes
Q01082	2324	SPTBN1	0.934436	0.936364	0.968161	YES	0.997639	0.937142	NA	YES	yes
P85037	682	FOXK1	NA	0.857505	0.840292	YES	NA	NA	NA	NO	yes
P85037	662	FOXK1	1	NA	0.999976	YES	NA	NA	0.999997	NO	yes
P85037	679	FOXK1	0.942071	0.999629	0.915433	YES	NA	NA	0.975638	NO	yes
P82909	37	MRPS36	1	NA	1	YES	NA	1	1	YES	yes
P78344	506	EIF4G2	0.848382	0.999432	0.992637	YES	0.949623	0.99928	0.995742	YES	yes
P78337	196	PITX1	0.900506	0.985502	0.985606	YES	0.994732	0.987744	0.98362	YES	yes
P78312	708	FAM193A	0.846056	NA	0.900939	YES	NA	0.908624	NA	NO	yes
P54253	82	ATXN1	0.990018	0.99908	0.999125	YES	0.997985	0.999097	0.994339	YES	yes
P52948	1064	NUP98	0.99898	0.999966	NA	YES	NA	0.999996	NA	NO	yes
P52948	428	NUP98	NA	0.919396	0.982232	YES	0.998634	0.918918	0.972138	YES	yes
P52948	262	NUP98	NA	0.870736	0.902299	YES	0.898242	NA	NA	NO	yes
P52948	281	NUP98	0.873254	NA	0.992327	YES	0.955505	NA	NA	NO	yes
P52594	291	AGFG1	0.960144	0.95058	0.996072	YES	NA	NA	NA	NO	yes
P52594	302	AGFG1	0.922985	0.857037	0.89614	YES	NA	NA	NA	NO	yes
P52594	362	AGFG1	0.999905	0.995816	NA	YES	0.999864	0.999106	0.994061	YES	yes
P52594	367	AGFG1	0.99917	0.997521	0.99153	YES	0.992364	0.992436	NA	YES	yes
P51610	775	HCFC1	NA	0.778771	0.999848	YES	NA	0.988172	0.999958	YES	yes
P51610	870	HCFC1	0.992266	NA	0.893657	YES	NA	0.912359	0.886885	YES	yes
P51610	1386	HCFC1	0.882503	0.987971	NA	YES	NA	NA	NA	NO	yes
P51610	480	HCFC1	1	1	1	YES	NA	1	NA	NO	yes
P51610	597	HCFC1	0.885305	NA	0.842537	YES	NA	NA	NA	NO	yes
P51610	619	HCFC1	0.871367	0.921794	0.929645	YES	NA	NA	0.964217	NO	yes
P51610	669	HCFC1	0.911226	0.908006	0.999342	YES	NA	0.976372	NA	NO	yes
P51610	1150	HCFC1	1	1	1	YES	1	1	1	YES	yes
P51610	1497	HCFC1	0.82149	NA	0.787377	YES	0.94995	NA	0.767659	YES	yes
P51610	405	HCFC1	0.999992	0.999854	0.999991	YES	0.999989	0.999659	0.999998	YES	yes
P51610	490	HCFC1	1	1	1	YES	1	0.999955	1	YES	yes
P51610	515	HCFC1	0.999991	0.999806	0.993284	YES	0.855781	0.999999	0.999898	YES	yes
P51610	562	HCFC1	0.934636	0.868969	0.990515	YES	0.999897	0.984499	0.999744	YES	yes
P51610	563	HCFC1	0.924733	NA	0.972698	YES	0.999069	0.898648	0.998003	YES	yes
P51610	579	HCFC1	1	0.999999	1	YES	1	1	1	YES	yes
P51610	588	HCFC1	0.830949	0.934305	0.920634	YES	0.993642	0.933028	0.986726	YES	yes
P51610	612	HCFC1	0.996069	NA	0.997606	YES	0.999785	0.999295	0.99658	YES	yes
P51610	620	HCFC1	0.934062	0.997176	0.991627	YES	0.994654	0.988608	0.99232	YES	yes
P51610	622	HCFC1	0.958355	0.992307	0.936417	YES	0.932547	0.977061	0.937693	YES	yes
P51610	623	HCFC1	0.883593	0.929073	0.902944	YES	0.972763	0.97565	0.912011	YES	yes
P51610	625	HCFC1	0.998075	0.981962	0.983247	YES	0.991167	0.999423	0.991391	YES	yes
P51610	638	HCFC1	0.999996	0.999939	0.999153	YES	0.999996	0.999999	0.999616	YES	yes
P51610	640	HCFC1	0.999996	0.999939	0.983417	YES	0.999996	0.999999	0.999	YES	yes
P51610	642	HCFC1	0.999996	0.999939	0.915815	YES	0.999996	0.999999	0.999	YES	yes
P51610	651	HCFC1	0.999957	0.999976	1	YES	0.999754	0.997605	0.999937	YES	yes
P51610	652	HCFC1	0.999921	0.999989	1	YES	0.997137	0.997992	0.999603	YES	yes
P51610	658	HCFC1	1	1	1	YES	0.999935	0.999993	NA	YES	yes
P51610	685	HCFC1	0.997736	0.999855	1	YES	0.997539	0.999998	1	YES	yes
P51610	694	HCFC1	0.992308	0.924562	0.993047	YES	0.988163	0.950255	0.893912	YES	yes
P51610	726	HCFC1	0.997222	0.995754	NA	YES	0.936045	0.985843	0.994764	YES	yes
P51610	761	HCFC1	0.878301	0.921126	NA	YES	0.990074	0.992978	0.992202	YES	yes
P51610	771	HCFC1	0.994814	0.927945	0.999596	YES	0.995289	0.995992	0.999829	YES	yes
P51610	779	HCFC1	0.967747	0.832846	0.984619	YES	0.976162	0.846782	0.882991	YES	yes
P51610	787	HCFC1	0.967275	0.855762	0.89496	YES	0.780187	0.989941	0.881434	YES	yes
P51610	801	HCFC1	0.997463	0.998175	0.999563	YES	0.997463	0.995012	0.995012	YES	yes
P51610	831	HCFC1	1	1	NA	YES	1	1	1	YES	yes
P51610	861	HCFC1	0.972725	NA	0.90036	YES	0.965609	0.934229	0.912345	YES	yes
P51610	858	HCFC1	0.806235	NA	0.987786	YES	0.995434	NA	NA	NO	yes
P51003	7	PAPOLA	0.990342	0.89026	NA	YES	0.935245	NA	0.997047	YES	yes
P50897	199	PPT1	1	1	1	YES	1	1	1	YES	yes
P50402	49	EMD	0.992374	0.986679	NA	YES	0.864237	NA	0.982414	YES	yes
P49848	481	TAF6	NA	0.941333	0.944645	YES	NA	0.921001	0.920962	YES	yes
P49792	1509	RANBP2	NA	0.753366	0.996983	YES	NA	NA	NA	NO	yes
P49792	1513	RANBP2	0.998	0.999889	0.993643	YES	0.997559	0.994515	0.907356	YES	yes
P49790	624	NUP153	1	1	NA	YES	NA	0.999559	0.999974	YES	yes
P49790	1041	NUP153	0.985565	0.994639	0.998608	YES	NA	NA	NA	NO	yes
P49790	1055	NUP153	0.999996	NA	0.999991	YES	NA	NA	NA	NO	yes
P49790	1180	NUP153	0.991921	NA	0.987796	YES	NA	NA	0.894423	NO	yes
P49790	556	NUP153	0.999996	NA	0.999998	YES	NA	NA	NA	NO	yes
P49790	1017	NUP153	0.980295	NA	0.991881	YES	0.977393	0.938513	NA	YES	yes
P49790	1018	NUP153	0.828891	NA	0.915927	YES	0.878238	0.862209	NA	YES	yes
P49790	1113	NUP153	0.925776	0.952969	0.76618	YES	0.922992	0.959335	0.903153	YES	yes
P49790	1156	NUP153	0.995256	0.988354	0.999911	YES	0.990976	0.998846	0.999971	YES	yes
P49790	1170	NUP153	0.999983	0.999995	0.999226	YES	0.999999	0.999929	0.999968	YES	yes
P49790	515	NUP153	0.999761	0.999815	0.999713	YES	0.99886	0.996928	NA	YES	yes
P49790	544	NUP153	0.923446	0.994529	0.996572	YES	0.981074	0.995166	0.983077	YES	yes
P49790	632	NUP153	0.993844	0.995718	0.840482	YES	0.994618	0.994039	0.995152	YES	yes
P49790	908	NUP153	0.999837	0.99981	0.99978	YES	0.999896	0.999757	0.999837	YES	yes
P49790	937	NUP153	0.999889	0.999843	0.999812	YES	0.999731	0.999775	0.999843	YES	yes
P49790	1179	NUP153	0.91887	NA	0.899559	YES	0.86997	NA	NA	NO	yes
P49336	411	CDK8	0.929065	0.99828	0.851273	YES	0.994603	0.994977	0.931043	YES	yes
P49336	412	CDK8	0.78946	0.99828	0.851273	YES	0.994603	0.990678	0.987137	YES	yes
P48723	185	HSPA13	0.999897	0.99966	0.999837	YES	0.993529	0.999438	0.999431	YES	yes
P48634	1796	PRRC2A	1	1	1	YES	1	1	1	YES	yes
P48382	439	RFX5	0.874296	0.985508	0.913132	YES	NA	NA	NA	NO	yes
P48029	623	SLC6A8	0.965375	NA	0.888147	YES	NA	NA	NA	NO	yes
P46977	550	STT3A	0.98934	0.998956	NA	YES	NA	NA	NA	NO	yes
P43243	22	MATR3	0.998798	NA	0.990914	YES	0.791296	0.999862	0.833803	YES	no
P40222	519	TXLNA	NA	0.999981	0.750783	YES	0.999999	1	NA	YES	yes
P39880	734	CUX1	0.999705	0.99986	NA	YES	0.97811	0.999927	0.999964	YES	yes
P35658	1929	NUP214	NA	0.999988	0.999771	YES	NA	NA	NA	NO	yes
P35658	1087	NUP214	0.962062	0.999226	NA	YES	NA	0.942567	0.991878	YES	yes
P35658	1146	NUP214	0.905735	0.92539	0.84085	YES	NA	0.940583	0.932192	YES	yes
P35658	1325	NUP214	0.996502	0.844166	0.993549	YES	NA	0.94135	0.991877	YES	yes
P35658	1055	NUP214	0.953865	0.954914	0.9195	YES	NA	0.811945	NA	NO	yes
P35658	1056	NUP214	0.944641	0.791159	0.93792	YES	NA	NA	NA	NO	yes
P35658	1549	NUP214	0.896267	NA	0.875266	YES	NA	NA	NA	NO	yes
P35658	601	NUP214	0.93314	0.905472	0.931227	YES	NA	NA	0.820122	NO	yes
P35658	602	NUP214	0.936986	0.912323	0.879107	YES	NA	NA	0.934563	NO	yes
P35658	636	NUP214	0.914368	0.986477	NA	YES	NA	NA	0.988259	NO	yes
P35658	1058	NUP214	0.983364	0.862421	0.802074	YES	0.972802	0.898829	0.803329	YES	yes
P35658	1137	NUP214	0.859077	0.86686	0.813789	YES	0.819685	NA	0.859199	YES	yes
P35658	1201	NUP214	0.971893	0.9956	0.999846	YES	0.976426	0.979759	0.968795	YES	yes
P35658	1202	NUP214	0.970503	0.999294	0.999343	YES	0.939988	0.993141	0.943899	YES	yes
P35658	1305	NUP214	0.945963	0.95318	NA	YES	0.94461	0.954327	0.750935	YES	yes
P35658	1904	NUP214	0.98394	0.976374	0.986378	YES	0.994614	0.981158	0.908485	YES	yes
P35658	1905	NUP214	0.884837	0.869544	0.894136	YES	0.954252	0.785285	NA	YES	yes
P35658	1907	NUP214	0.99082	0.864971	0.825384	YES	0.954252	0.895845	NA	YES	yes
P35658	526	NUP214	0.999997	0.999971	0.999989	YES	0.999883	0.999935	0.999106	YES	yes
P35658	1229	NUP214	NA	0.929236	0.823787	YES	0.922953	NA	NA	NO	no
P35658	1306	NUP214	NA	0.976685	0.865077	YES	0.917745	NA	NA	NO	yes
P32519	474	ELF1	NA	0.990369	0.98163	YES	0.983952	0.972532	0.987116	YES	yes
P31629	251	HIVEP2	NA	0.996541	0.934787	YES	NA	0.957339	0.986568	YES	yes
P31629	1062	HIVEP2	NA	0.999988	0.999807	YES	NA	NA	NA	NO	yes
P31629	1274	HIVEP2	1	1	1	YES	NA	NA	NA	NO	no
P31629	2157	HIVEP2	1	NA	1	YES	NA	NA	NA	NO	yes
P31629	392	HIVEP2	0.999644	0.999805	NA	YES	NA	NA	NA	NO	yes
P31629	549	HIVEP2	0.759386	NA	0.969303	YES	NA	NA	NA	NO	yes
P30622	143	CLIP1	0.999526	0.995874	0.999784	YES	0.986749	0.797441	0.999997	YES	yes
P28356	172	HOXD9	0.999999	1	1	YES	0.99999	0.999997	0.999999	YES	yes
P27816	797	MAP4	1	1	1	YES	1	0.999994	0.999997	YES	yes
P27816	804	MAP4	NA	0.971571	0.925731	YES	0.931799	0.878481	NA	YES	no
P27540	643	ARNT	NA	0.896977	0.922672	YES	NA	0.918358	NA	NO	yes
P22670	244	RFX1	0.999998	0.999999	NA	YES	NA	NA	NA	NO	yes
P18846	189	ATF1	NA	0.882961	0.894846	YES	NA	0.877932	NA	NO	yes
P18846	183	ATF1	0.882961	0.869661	0.905946	YES	0.903976	0.893965	0.968766	YES	yes
P18583	253	SON	0.873102	0.927802	0.931429	YES	0.927918	0.917611	0.942212	YES	yes
P18583	254	SON	0.934318	0.85714	0.949196	YES	0.999472	NA	0.906265	YES	yes
P18583	252	SON	0.957638	0.97626	0.958293	YES	0.754206	NA	NA	NO	yes
P18146	120	EGR1	0.950764	0.869367	0.95214	YES	0.945195	0.815762	0.9441	YES	yes
P17275	95	JUNB	0.999301	1	0.97772	YES	NA	NA	NA	NO	yes
P16144	1485	ITGB4	NA	0.920479	0.982553	YES	NA	NA	NA	NO	yes
P15822	845	HIVEP1	0.878379	0.825858	NA	YES	NA	NA	NA	NO	no
P15822	1919	HIVEP1	0.881288	0.980188	NA	YES	0.999648	0.999839	NA	YES	yes
P15822	2325	HIVEP1	0.997949	NA	0.996752	YES	0.998892	NA	NA	NO	yes
P14859	255	POU2F1	NA	1	0.998156	YES	0.984442	1	0.999779	YES	yes
P14625	219	HSP90B1	1	1	1	YES	1	1	1	YES	yes
P14625	64	HSP90B1	1	1	1	YES	1	1	1	YES	yes
P0C7T5	203	ATXN1L	0.841708	0.984629	0.780902	YES	0.855845	0.974779	0.808237	YES	no
P09769;P06241;P07947	181;186;195	FGR;FYN;YES1	1	NA	1	YES	NA	NA	NA	NO	no
P09769;P06241;P07947	183;188;197	FGR;FYN;YES1	1	NA	1	YES	NA	NA	NA	NO	no
P08670	49	VIM	0.935969	0.997971	0.992522	YES	0.997259	0.952232	0.925646	YES	yes
P07858	194	CTSB	0.839494	0.95311	0.996598	YES	NA	NA	NA	NO	yes
P07711	218	CTSL	0.999544	0.976626	NA	YES	NA	NA	NA	NO	yes
P05783	30	KRT18	0.997534	0.999954	0.999954	YES	0.951257	0.998636	0.999921	YES	yes
P05387	74	RPLP2	0.999988	1	0.961896	YES	NA	0.99999	NA	NO	yes
P04792	184	HSPB1	0.994461	0.995239	0.999901	YES	0.840345	0.999507	0.999989	YES	yes
P04792	174	HSPB1	0.999991	0.999712	0.999999	YES	0.999905	NA	NA	NO	yes
P02545	612	LMNA	0.999999	0.999998	NA	YES	NA	NA	NA	NO	yes
P02545	613	LMNA	0.999998	0.999851	NA	YES	NA	NA	NA	NO	yes
P02545	643	LMNA	1	0.999997	1	YES	1	NA	1	YES	yes
O96005	297	CLPTM1	0.99973	0.99982	0.999997	YES	NA	NA	NA	NO	yes
O95628	309	CNOT4	0.932845	NA	0.999253	YES	NA	NA	NA	NO	yes
O95628	316	CNOT4	NA	0.952421	0.934082	YES	0.986567	0.99245	NA	YES	yes
O95628	324	CNOT4	0.990167	0.999977	0.944139	YES	0.999869	0.999578	0.99619	YES	no
O95487	344	SEC24B	0.898908	0.998688	0.936992	YES	NA	0.776432	0.974697	YES	yes
O95487	310	SEC24B	NA	0.956237	0.918048	YES	0.93204	0.918298	0.963117	YES	yes
O95487	342	SEC24B	0.977505	0.998082	0.834055	YES	0.911642	0.937625	0.910812	YES	yes
O95486	162	SEC24A	0.976525	0.968014	NA	YES	NA	NA	NA	NO	yes
O94913	181	PCF11	0.982495	0.970672	0.996864	YES	NA	0.84772	0.907249	YES	yes
O94901	734	SUN1	0.908847	0.779255	NA	YES	0.793992	NA	0.845687	YES	no
O76096	114	CST7	0.89787	0.988819	NA	YES	NA	NA	NA	NO	yes
O75376	2233	NCOR1	0.976217	0.956934	0.96897	YES	NA	0.848041	0.906758	YES	yes
O75376	1883	NCOR1	0.913958	0.99349	0.982773	YES	NA	0.835735	NA	NO	yes
O75376	1027	NCOR1	0.984921	NA	0.980633	YES	0.901692	0.88473	0.85367	YES	yes
O75376	1040	NCOR1	0.838269	0.988388	0.980797	YES	0.98776	0.994053	0.977508	YES	yes
O75179	2001	ANKRD17	1	1	1	YES	1	1	1	YES	yes
O75170	887	PPP6R2	1	1	1	YES	1	1	1	YES	yes
O60675	133	MAFK	NA	0.937375	0.925149	YES	NA	0.816485	NA	NO	yes
O60675	153	MAFK	0.999763	0.984191	0.931211	YES	NA	NA	NA	NO	yes
O60568	65	PLOD3	NA	0.99954	0.987975	YES	0.981575	0.933057	NA	YES	yes
O43852	133	CALU	NA	1	1	YES	1	1	1	YES	yes
O43670	263	ZNF207	NA	0.929479	0.771983	YES	NA	NA	NA	NO	yes
O43670	266	ZNF207	0.994643	0.99408	0.96604	YES	0.933813	NA	NA	NO	yes
O43567	89	RNF13	0.999432	NA	0.923013	YES	0.996735	0.91539	0.980582	YES	no
O43426	1336	SYNJ1	1	0.999993	NA	YES	1	0.999872	1	YES	yes
O15550	731	KDM6A	NA	0.896043	0.901002	YES	NA	NA	0.991052	NO	yes
O15460	263	P4HA2	NA	0.873293	0.947459	YES	NA	NA	NA	NO	no
O15027	823	SEC16A	1	1	1	YES	1	1	1	YES	yes
O15018	2254	PDZD2	0.98561	0.998803	0.977779	YES	NA	NA	NA	NO	yes
O14974	564	PPP1R12A	NA	0.977017	0.804811	YES	NA	NA	NA	NO	yes
O14974	590	PPP1R12A	NA	0.846204	0.958266	YES	NA	NA	NA	NO	yes
O14974	637	PPP1R12A	NA	0.970348	0.870303	YES	NA	NA	NA	NO	yes
O14974	577	PPP1R12A	0.983561	0.943353	0.773658	YES	NA	NA	NA	NO	yes
O14974	578	PPP1R12A	0.93334	0.9628	0.899751	YES	0.792812	0.896651	0.978819	YES	yes
O14974	570	PPP1R12A	0.946264	0.903386	0.970414	YES	0.946232	NA	NA	NO	yes
O14974	571	PPP1R12A	0.948674	0.948727	0.970414	YES	0.946232	NA	NA	NO	yes
O14964	299	HGS	0.789779	NA	0.863934	YES	NA	NA	NA	NO	yes
O14686	2402	KMT2D	NA	0.999627	0.999996	YES	0.99977	0.999998	0.999999	YES	yes
O14497	255	ARID1A	0.950473	0.830982	0.869212	YES	0.862795	0.845978	0.903724	YES	yes
O00268	409	TAF4	NA	0.99145	0.879948	YES	NA	NA	0.865755	NO	yes
O00268	528	TAF4	1	1	1	YES	1	1	1	YES	yes
M0QZ24;O00754	119;932	MAN2B1	0.99551	0.972865	0.999973	YES	0.99901	0.999886	NA	YES	yes
H7C469;P07339	65;265	CTSD	0.988074	0.987997	NA	YES	0.88834	NA	0.96328	YES	yes
H0YHG0;P82979	428;115	SARNP	NA	0.999823	0.999851	YES	NA	NA	0.999614	NO	yes
A8CG34;Q96HA1	670;693	POM121C;POM121	0.999978	0.999919	0.999926	YES	NA	0.997209	NA	NO	yes
A8CG34;Q96HA1	671;694	POM121C;POM121	0.999431	0.998722	0.999584	YES	NA	0.99892	NA	NO	yes
A8CG34	984	POM121C	0.923262	NA	0.987713	YES	NA	NA	NA	NO	yes
A5YKK6	1038	CNOT1	0.869341	NA	0.940841	YES	0.976848	0.985755	0.900096	YES	yes
A5YKK6	1041	CNOT1	0.998783	0.948743	0.950269	YES	0.999963	NA	0.968934	YES	yes
A5YKK6	1042	CNOT1	0.998766	0.901315	0.934978	YES	0.996259	0.898748	0.888724	YES	yes
A5YKK6	1051	CNOT1	1	1	1	YES	0.999999	0.999999	1	YES	yes
A3KN83	126	SBNO1	0.999455	0.999646	0.999868	YES	0.999676	0.99953	0.999699	YES	yes
A3KN83	130	SBNO1	NA	0.936179	0.922816	YES	0.988594	0.938775	0.840235	YES	yes
A0A0G2JR68;Q9HAP2	73;602	MLXIP	0.996316	0.847336	NA	YES	NA	NA	0.932568	NO	no
A0A0B4J203;Q6UN15	205;205	FIP1L1	0.990912	0.902409	0.875952	YES	0.997266	0.921748	NA	YES	yes
A0A0B4J203;Q6UN15	253;253	FIP1L1	NA	0.9479	0.9657	YES	0.941227	0.980876	0.845617	YES	yes
Q9Y618	1570	NCOR2	NA	NA	NA	NO	NA	NA	0.986153	NO	yes
Q9Y618	1827	NCOR2	NA	NA	NA	NO	NA	NA	0.921712	NO	yes
Q9Y520	2633	PRRC2C	NA	NA	NA	NO	NA	NA	1	NO	yes
Q9Y520	2681	PRRC2C	NA	NA	NA	NO	NA	NA	0.797399	NO	no
Q9Y450	152	HBS1L	NA	NA	NA	NO	NA	NA	0.895568	NO	no
Q9UPP1	501	PHF8	NA	NA	NA	NO	NA	NA	0.999653	NO	no
Q9ULM3	998	YEATS2	NA	NA	NA	NO	NA	NA	0.989968	NO	yes
Q9ULM3	531	YEATS2	NA	NA	NA	NO	NA	NA	0.973369	NO	no
Q9ULM3	525	YEATS2	NA	NA	NA	NO	NA	NA	0.837314	NO	no
Q9ULM3	1011	YEATS2	NA	NA	NA	NO	NA	NA	0.830705	NO	no
Q9ULL5	363	PRR12	NA	NA	NA	NO	NA	NA	0.855467	NO	yes
Q9UKY1	449	ZHX1	NA	NA	NA	NO	NA	NA	0.792218	NO	yes
Q9UJX2	576	CDC23	NA	NA	NA	NO	NA	NA	0.817162	NO	no
Q9UHD9	125	UBQLN2	NA	NA	NA	NO	NA	NA	0.823599	NO	yes
Q9UGU0	220	TCF20	NA	NA	NA	NO	NA	NA	0.866921	NO	yes
Q9P2N6	534	KANSL3	NA	NA	NA	NO	NA	NA	0.917715	NO	yes
Q9P258	20	RCC2	NA	NA	NA	NO	NA	NA	0.953932	NO	no
Q9P0X4	981	CACNA1I	NA	NA	NA	NO	NA	NA	1	NO	no
Q9P0X4	986	CACNA1I	NA	NA	NA	NO	NA	NA	1	NO	no
Q9NZN8	101	CNOT2	NA	NA	NA	NO	NA	NA	0.808914	NO	no
Q9HCK8	256	CHD8	NA	NA	NA	NO	NA	NA	0.999908	NO	no
Q9HCJ0	1602	TNRC6C	NA	NA	NA	NO	NA	NA	0.783179	NO	yes
Q9HCD6	1647	TANC2	NA	NA	NA	NO	NA	NA	0.841112	NO	yes
Q9HBD1	561	RC3H2	NA	NA	NA	NO	NA	NA	0.998336	NO	yes
Q9HBD1	952	RC3H2	NA	NA	NA	NO	NA	NA	0.875651	NO	no
Q9H7S9	196	ZNF703	NA	NA	NA	NO	NA	NA	0.999242	NO	no
Q9H0E9	280	BRD8	NA	NA	NA	NO	NA	NA	0.830119	NO	yes
Q99959	203	PKP2	NA	NA	NA	NO	NA	NA	0.999975	NO	no
Q99873	191	PRMT1	NA	NA	NA	NO	NA	NA	0.999921	NO	no
Q96T58	2681	SPEN	NA	NA	NA	NO	NA	NA	0.986455	NO	no
Q96RK0	734	CIC	NA	NA	NA	NO	NA	NA	0.827958	NO	yes
Q96PU8	217	QKI	NA	NA	NA	NO	NA	NA	0.961919	NO	yes
Q96PK6	256	RBM14	NA	NA	NA	NO	NA	NA	0.971698	NO	yes
Q96L91	3019	EP400	NA	NA	NA	NO	NA	NA	0.999187	NO	yes
Q96L91	2686	EP400	NA	NA	NA	NO	NA	NA	0.997495	NO	yes
Q96L91	1527	EP400	NA	NA	NA	NO	NA	NA	0.91006	NO	yes
Q96KR1	434	ZFR	NA	NA	NA	NO	NA	NA	0.831668	NO	yes
Q96I24	442	FUBP3	NA	NA	NA	NO	NA	NA	0.910313	NO	yes
Q96HE7	282	ERO1L	NA	NA	NA	NO	NA	NA	1	NO	yes
Q96HA1;A8CG34	694;671	POM121;POM121C	NA	NA	NA	NO	NA	NA	0.997403	NO	yes
Q96HA1;A8CG34	697;674	POM121;POM121C	NA	NA	NA	NO	NA	NA	0.929353	NO	no
Q96HA1	1000	POM121	NA	NA	NA	NO	NA	NA	0.812593	NO	no
Q96BD5	273	PHF21A	NA	NA	NA	NO	NA	NA	0.886629	NO	yes
Q92750	187	TAF4B	NA	NA	NA	NO	NA	NA	0.82057	NO	yes
Q92615	585	LARP4B	NA	NA	NA	NO	NA	NA	0.99543	NO	no
Q92540	948	SMG7	NA	NA	NA	NO	NA	NA	1	NO	yes
Q8WYQ9	619	ZCCHC14	NA	NA	NA	NO	NA	NA	0.935415	NO	no
Q8WY36	258	BBX	NA	NA	NA	NO	NA	NA	0.861647	NO	yes
Q8TEK3	1449	DOT1L	NA	NA	NA	NO	NA	NA	0.795268	NO	no
Q8TCN5	217	ZNF507	NA	NA	NA	NO	NA	NA	0.998475	NO	yes
Q8TB72	85	PUM2	NA	NA	NA	NO	NA	NA	0.983644	NO	yes
Q8NFD5	1577	ARID1B	NA	NA	NA	NO	NA	NA	0.858503	NO	yes
Q8NEZ4	1840	KMT2C	NA	NA	NA	NO	NA	NA	0.852214	NO	yes
Q8NDX5	645	PHC3	NA	NA	NA	NO	NA	NA	0.907665	NO	no
Q8N1I0	1787	DOCK4	NA	NA	NA	NO	NA	NA	0.98534	NO	no
Q8IZ21	233	PHACTR4	NA	NA	NA	NO	NA	NA	0.999985	NO	yes
Q8IVW6	165	ARID3B	NA	NA	NA	NO	NA	NA	0.76256	NO	yes
Q86YP4	300	GATAD2A	NA	NA	NA	NO	NA	NA	0.95537	NO	no
Q86SU0	341	ILDR1	NA	NA	NA	NO	NA	NA	0.912502	NO	no
Q7Z417	376	NUFIP2	NA	NA	NA	NO	NA	NA	0.803217	NO	yes
Q7LBC6	659	KDM3B	NA	NA	NA	NO	NA	NA	0.812432	NO	yes
Q6PJT7	77	ZC3H14	NA	NA	NA	NO	NA	NA	0.915852	NO	no
Q6PJT7	78	ZC3H14	NA	NA	NA	NO	NA	NA	0.887265	NO	yes
Q6MZP7	257	LIN54	NA	NA	NA	NO	NA	NA	0.984919	NO	no
Q5VZL5	891	ZMYM4	NA	NA	NA	NO	NA	NA	0.867626	NO	no
Q5VWN6	1098	FAM208B	NA	NA	NA	NO	NA	NA	0.810881	NO	yes
Q5VT52	411	RPRD2	NA	NA	NA	NO	NA	NA	0.980964	NO	yes
Q5VT52	470	RPRD2	NA	NA	NA	NO	NA	NA	0.798611	NO	no
Q5VT52	500	RPRD2	NA	NA	NA	NO	NA	NA	0.764663	NO	yes
Q5T8P6	691	RBM26	NA	NA	NA	NO	NA	NA	0.821935	NO	yes
Q5T6F2	372	UBAP2	NA	NA	NA	NO	NA	NA	0.987548	NO	yes
Q5T6F2	486	UBAP2	NA	NA	NA	NO	NA	NA	0.872458	NO	yes
Q5T6F2	630	UBAP2	NA	NA	NA	NO	NA	NA	0.802842	NO	no
Q5JTV8	266	TOR1AIP1	NA	NA	NA	NO	NA	NA	0.903339	NO	no
Q5HYC2	1765	KIAA2026	NA	NA	NA	NO	NA	NA	0.97934	NO	yes
Q4LDE5	2088	SVEP1	NA	NA	NA	NO	NA	NA	0.999194	NO	no
Q4LDE5	2090	SVEP1	NA	NA	NA	NO	NA	NA	0.999194	NO	no
Q4LDE5	2092	SVEP1	NA	NA	NA	NO	NA	NA	0.998174	NO	no
Q2TAL8	365	QRICH1	NA	NA	NA	NO	NA	NA	0.816692	NO	yes
Q15723	375	ELF2	NA	NA	NA	NO	NA	NA	0.830033	NO	no
Q15652	1083	JMJD1C	NA	NA	NA	NO	NA	NA	0.984556	NO	no
Q15652	2073	JMJD1C	NA	NA	NA	NO	NA	NA	0.921663	NO	yes
Q15233	440	NONO	NA	NA	NA	NO	NA	NA	0.999917	NO	no
Q14814	275	MEF2D	NA	NA	NA	NO	NA	NA	0.912767	NO	yes
Q14157	277	UBAP2L	NA	NA	NA	NO	NA	NA	0.979601	NO	yes
Q13227	161	GPS2	NA	NA	NA	NO	NA	NA	0.908749	NO	yes
Q12948	340	FOXC1	NA	NA	NA	NO	NA	NA	0.846416	NO	no
Q12830	2101	BPTF	NA	NA	NA	NO	NA	NA	0.891318	NO	yes
Q12830	2246	BPTF	NA	NA	NA	NO	NA	NA	0.773748	NO	no
Q09472	1890	EP300	NA	NA	NA	NO	NA	NA	1	NO	yes
Q05209	625	PTPN12	NA	NA	NA	NO	NA	NA	0.791814	NO	no
P98171	203	ARHGAP4	NA	NA	NA	NO	NA	NA	0.757672	NO	yes
P78312	260	FAM193A	NA	NA	NA	NO	NA	NA	0.897388	NO	no
P61201	221	COPS2	NA	NA	NA	NO	NA	NA	1	NO	no
P54259	428	ATN1	NA	NA	NA	NO	NA	NA	0.957463	NO	no
P53814	377	SMTN	NA	NA	NA	NO	NA	NA	0.990257	NO	no
P51610	1063	HCFC1	NA	NA	NA	NO	NA	NA	0.922788	NO	yes
P51610	733	HCFC1	NA	NA	NA	NO	NA	NA	0.850297	NO	yes
P49792	1757	RANBP2	NA	NA	NA	NO	NA	NA	0.871999	NO	yes
P49792	2499	RANBP2	NA	NA	NA	NO	NA	NA	0.805466	NO	yes
P49790	1456	NUP153	NA	NA	NA	NO	NA	NA	0.997429	NO	yes
P49790	1042	NUP153	NA	NA	NA	NO	NA	NA	0.778652	NO	yes
P49790	1031	NUP153	NA	NA	NA	NO	NA	NA	0.758726	NO	yes
P46013	858	MKI67	NA	NA	NA	NO	NA	NA	0.953503	NO	yes
P35658	1038	NUP214	NA	NA	NA	NO	NA	NA	0.988304	NO	yes
P35613	158	BSG	NA	NA	NA	NO	NA	NA	0.998297	NO	no
P27816	864	MAP4	NA	NA	NA	NO	NA	NA	0.765263	NO	no
P27540	642	ARNT	NA	NA	NA	NO	NA	NA	0.898242	NO	yes
P15822	1744	HIVEP1	NA	NA	NA	NO	NA	NA	0.963345	NO	no
P15822	827	HIVEP1	NA	NA	NA	NO	NA	NA	0.948173	NO	no
P15336	294	ATF2	NA	NA	NA	NO	NA	NA	0.956783	NO	yes
P0C7T5	40	ATXN1L	NA	NA	NA	NO	NA	NA	0.98631	NO	yes
P08670	5	VIM	NA	NA	NA	NO	NA	NA	0.955817	NO	yes
P05783	18	KRT18	NA	NA	NA	NO	NA	NA	0.987218	NO	yes
P04406	210	GAPDH	NA	NA	NA	NO	NA	NA	0.84737	NO	yes
P00519	840	ABL1	NA	NA	NA	NO	NA	NA	0.853873	NO	no
O95487	315	SEC24B	NA	NA	NA	NO	NA	NA	0.841092	NO	yes
O75376	51	NCOR1	NA	NA	NA	NO	NA	NA	0.965623	NO	yes
O75376	1806	NCOR1	NA	NA	NA	NO	NA	NA	0.833182	NO	yes
O75179	1850	ANKRD17	NA	NA	NA	NO	NA	NA	0.956112	NO	no
O75179	1845	ANKRD17	NA	NA	NA	NO	NA	NA	0.800317	NO	no
O60907	160	TBL1X	NA	NA	NA	NO	NA	NA	0.981891	NO	no
O60664	76	PLIN3	NA	NA	NA	NO	NA	NA	0.978929	NO	yes
O15047	278	SETD1A	NA	NA	NA	NO	NA	NA	0.859363	NO	yes
O14974	588	PPP1R12A	NA	NA	NA	NO	NA	NA	0.847956	NO	no
O14497	256	ARID1A	NA	NA	NA	NO	NA	NA	0.977922	NO	yes
O00754;M0QZ24	932;119	MAN2B1	NA	NA	NA	NO	NA	NA	0.983296	NO	yes
A0A0B4J203;Q6UN15	206;206	FIP1L1	NA	NA	NA	NO	NA	NA	0.78996	NO	yes
U3KPZ7;Q9P2N5	468;523	RBM27	NA	NA	NA	NO	0.836811	NA	0.959443	YES	yes
Q9Y6Q9	860	NCOA3	NA	NA	NA	NO	NA	0.910499	NA	NO	no
Q9Y6Q9	910	NCOA3	NA	0.799143	NA	NO	NA	0.844428	NA	NO	yes
Q9Y6Q9	857	NCOA3	NA	NA	NA	NO	1	NA	NA	NO	yes
Q9Y618	1826	NCOR2	NA	NA	NA	NO	NA	0.860758	NA	NO	no
Q9Y520	2221	PRRC2C	NA	NA	NA	NO	NA	0.805419	NA	NO	yes
Q9Y520	2238	PRRC2C	NA	NA	NA	NO	0.978179	NA	0.987974	YES	yes
Q9Y520	2242	PRRC2C	NA	NA	NA	NO	0.954121	NA	0.782966	YES	yes
Q9Y520	2469	PRRC2C	1	NA	NA	NO	0.999976	NA	NA	NO	yes
Q9Y520	2692	PRRC2C	NA	0.781733	NA	NO	0.758314	NA	NA	NO	yes
Q9Y4L1	598	HYOU1	NA	NA	0.999989	NO	NA	NA	NA	NO	yes
Q9Y4L1	517	HYOU1	NA	NA	0.946874	NO	NA	NA	NA	NO	no
Q9Y4G8	1166	RAPGEF2	NA	NA	NA	NO	NA	0.999992	0.999998	YES	yes
Q9Y4B6	891	VPRBP	NA	NA	0.844247	NO	NA	NA	NA	NO	yes
Q9Y4B5	187	MTCL1	NA	NA	NA	NO	0.999999	NA	1	YES	yes
Q9Y4B4	983	RAD54L2	NA	0.924985	NA	NO	NA	NA	NA	NO	yes
Q9Y4B4	1075	RAD54L2	NA	NA	NA	NO	0.941453	NA	NA	NO	yes
Q9Y2X9	694	ZNF281	NA	NA	0.984399	NO	0.996946	0.990864	0.990627	YES	yes
Q9Y2W2	622	WBP11	NA	NA	NA	NO	NA	0.847985	0.959718	YES	no
Q9Y2F5	438	ICE1	NA	NA	NA	NO	0.999598	NA	NA	NO	yes
Q9UQR1	113	ZNF148	NA	NA	NA	NO	NA	1	1	YES	no
Q9UQ35	2259	SRRM2	NA	NA	NA	NO	NA	0.9999	NA	NO	no
Q9UQ35	2456	SRRM2	NA	NA	NA	NO	NA	0.997655	NA	NO	no
Q9UQ35	2236	SRRM2	NA	1	NA	NO	NA	NA	NA	NO	yes
Q9UQ35	111	SRRM2	NA	NA	NA	NO	0.943479	NA	0.982423	YES	yes
Q9UQ35	119	SRRM2	0.897433	NA	NA	NO	0.921354	0.973709	NA	YES	yes
Q9UQ35	2388	SRRM2	1	NA	NA	NO	1	NA	NA	NO	yes
Q9UQ35	2459	SRRM2	NA	NA	NA	NO	0.988776	NA	NA	NO	yes
Q9UPQ9	327	TNRC6B	NA	NA	NA	NO	NA	0.959187	NA	NO	no
Q9UPN9	638	TRIM33	NA	NA	NA	NO	NA	0.80066	NA	NO	yes
Q9UPN6	611	SCAF8	NA	NA	0.999835	NO	NA	NA	NA	NO	yes
Q9UPN6	807	SCAF8	NA	0.993064	NA	NO	NA	NA	NA	NO	no
Q9UPN6	614	SCAF8	NA	0.959281	NA	NO	NA	NA	NA	NO	yes
Q9UPN6	779	SCAF8	NA	NA	NA	NO	0.973433	0.980804	0.945641	YES	yes
Q9UPN4	1082	CEP131	0.904328	NA	NA	NO	NA	NA	NA	NO	no
Q9UNF1	81	MAGED2	NA	0.999855	NA	NO	NA	0.998209	0.955626	YES	yes
Q9UN79	308	SOX13	NA	NA	0.913294	NO	0.87305	NA	NA	NO	no
Q9ULU4	779	ZMYND8	0.8948	NA	NA	NO	NA	NA	NA	NO	no
Q9ULU4	780	ZMYND8	0.974719	NA	NA	NO	NA	NA	NA	NO	yes
Q9ULU4	746	ZMYND8	NA	0.997648	NA	NO	0.994658	0.943365	0.973755	YES	no
Q9ULU4	504	ZMYND8	NA	NA	NA	NO	0.869165	NA	NA	NO	no
Q9ULM3	703	YEATS2	NA	NA	NA	NO	NA	0.999738	0.999532	YES	yes
Q9ULM3	1014	YEATS2	NA	NA	NA	NO	NA	0.990618	NA	NO	yes
Q9ULM3	389	YEATS2	NA	NA	0.857469	NO	0.895909	0.981024	0.959681	YES	yes
Q9ULJ3	320	ZBTB21	NA	NA	NA	NO	NA	0.841769	NA	NO	yes
Q9ULH4	403	LRFN2	NA	NA	NA	NO	NA	0.994435	NA	NO	no
Q9UKY7	144	CDV3	NA	NA	0.999997	NO	NA	NA	NA	NO	no
Q9UKY7	165	CDV3	0.866503	NA	NA	NO	0.788063	NA	0.873955	YES	yes
Q9UKY1	227	ZHX1	NA	NA	NA	NO	0.901751	0.87301	0.912518	YES	yes
Q9UKY1	228	ZHX1	NA	NA	NA	NO	0.901751	0.957834	0.912391	YES	yes
Q9UKY1	450	ZHX1	NA	NA	NA	NO	0.797234	0.993219	0.938762	YES	yes
Q9UKE5	568	TNIK	0.999881	NA	NA	NO	0.999753	0.999997	0.99999	YES	yes
Q9UIU6	649	SIX4	NA	NA	NA	NO	NA	0.999546	NA	NO	yes
Q9UIU6	437	SIX4	0.799329	NA	NA	NO	0.775312	NA	NA	NO	no
Q9UHY1	534	NRBP1	NA	NA	0.84234	NO	NA	NA	0.89811	NO	yes
Q9UHR5	238	SAP30BP	NA	0.828717	NA	NO	NA	NA	NA	NO	yes
Q9UHR5	239	SAP30BP	0.901535	NA	NA	NO	NA	NA	NA	NO	yes
Q9UHR5	231	SAP30BP	NA	NA	NA	NO	0.935585	0.897745	0.921345	YES	no
Q9UHR5	232	SAP30BP	NA	NA	0.900529	NO	0.921321	0.9442	NA	YES	yes
Q9UHR5	241	SAP30BP	NA	NA	NA	NO	0.856785	NA	NA	NO	yes
Q9UHD9	121	UBQLN2	NA	NA	0.789753	NO	NA	NA	NA	NO	yes
Q9UHD9	124	UBQLN2	NA	NA	NA	NO	0.887946	NA	NA	NO	yes
Q9UHD8	55	44448	NA	NA	0.996638	NO	NA	NA	NA	NO	no
Q9UGP4	298	LIMD1	NA	NA	NA	NO	NA	0.989422	NA	NO	yes
Q9UGL1	116	KDM5B	NA	NA	NA	NO	1	NA	NA	NO	no
Q9UGL1	117	KDM5B	NA	NA	NA	NO	1	NA	NA	NO	no
Q9P2R6	1231	RERE	NA	NA	NA	NO	0.856063	NA	NA	NO	yes
Q9P2N6	805	KANSL3	NA	NA	NA	NO	NA	0.995986	NA	NO	yes
Q9P2N6	859	KANSL3	0.961153	NA	NA	NO	NA	NA	NA	NO	yes
Q9P2N6	720	KANSL3	0.97203	NA	NA	NO	0.840174	NA	NA	NO	yes
Q9P2N6	787	KANSL3	NA	NA	NA	NO	0.998406	NA	NA	NO	no
Q9P2N6	860	KANSL3	NA	NA	NA	NO	0.870804	NA	NA	NO	yes
Q9P2D6	749	FAM135A	NA	NA	NA	NO	0.991473	NA	0.998605	YES	yes
Q9P265	217	DIP2B	NA	0.986819	NA	NO	0.999864	NA	NA	NO	no
Q9P219	1519	CCDC88C	0.814007	NA	NA	NO	NA	NA	NA	NO	no
Q9P1Y5	338	CAMSAP3	NA	NA	NA	NO	0.974799	0.998631	NA	YES	yes
Q9NZN8	111	CNOT2	NA	NA	0.822844	NO	NA	NA	NA	NO	no
Q9NZM4	270	GLTSCR1	0.764032	NA	NA	NO	NA	NA	NA	NO	no
Q9NZM4	1260	GLTSCR1	0.999901	NA	NA	NO	0.998722	NA	0.999255	YES	no
Q9NZM4	431	GLTSCR1	NA	0.933624	NA	NO	0.910785	NA	NA	NO	no
Q9NZJ4	2858	SACS	NA	NA	NA	NO	NA	1	NA	NO	no
Q9NZI5	146	GRHL1	NA	0.901841	NA	NO	NA	NA	0.975421	NO	no
Q9NYJ8	180	TAB2	NA	NA	NA	NO	0.999907	NA	NA	NO	yes
Q9NYJ8	456	TAB2	NA	NA	NA	NO	0.999895	NA	NA	NO	yes
Q9NYB9	361	ABI2	NA	NA	NA	NO	0.95352	NA	NA	NO	no
Q9NXV6	323	CDKN2AIP	NA	NA	0.935828	NO	NA	NA	NA	NO	yes
Q9NXV6	387	CDKN2AIP	NA	NA	NA	NO	0.840252	0.979001	0.895486	YES	yes
Q9NXV6	337	CDKN2AIP	NA	NA	NA	NO	0.846269	NA	NA	NO	no
Q9NXE8	195	CWC25	NA	NA	NA	NO	0.871046	NA	0.871046	YES	no
Q9NXE8	196	CWC25	NA	NA	NA	NO	0.976696	NA	0.976696	YES	no
Q9NUL7	356	DDX28	NA	NA	NA	NO	NA	0.996409	NA	NO	no
Q9NUL3	435	STAU2	NA	NA	NA	NO	0.992792	0.913506	0.9945	YES	no
Q9NTZ6	130	RBM12	NA	NA	0.905942	NO	NA	NA	NA	NO	yes
Q9NTZ6	138	RBM12	NA	0.797034	NA	NO	NA	NA	0.881787	NO	yes
Q9NTZ6	103	RBM12	NA	NA	NA	NO	1	0.999999	1	YES	yes
Q9NTZ6	137	RBM12	0.762036	NA	NA	NO	0.921408	NA	NA	NO	yes
Q9NSI2	39	FAM207A	NA	NA	NA	NO	0.810446	NA	NA	NO	yes
Q9NQX3	260	GPHN	0.995946	NA	NA	NO	0.991855	0.999999	0.991684	YES	yes
Q9NPI6	382	DCP1A	NA	NA	NA	NO	NA	0.9948	NA	NO	yes
Q9NPG3	862	UBN1	NA	NA	NA	NO	NA	0.925587	NA	NO	yes
Q9NPG3	989	UBN1	0.776878	NA	NA	NO	NA	NA	NA	NO	yes
Q9NPF5	418	DMAP1	0.808422	NA	NA	NO	NA	NA	NA	NO	no
Q9HCK8	2522	CHD8	NA	NA	NA	NO	NA	0.875667	0.910808	YES	yes
Q9HCJ0	1453	TNRC6C	NA	NA	NA	NO	NA	0.976507	NA	NO	yes
Q9HCJ0	1603	TNRC6C	NA	NA	0.843151	NO	0.899207	0.768618	0.860986	YES	yes
Q9HCJ0	547	TNRC6C	NA	NA	NA	NO	0.995487	0.99326	NA	YES	no
Q9HCE3	479	ZNF532	NA	NA	NA	NO	NA	0.948774	0.958317	YES	no
Q9HCE3	456	ZNF532	NA	NA	NA	NO	1	1	NA	YES	yes
Q9HCD5	395	NCOA5	0.858367	NA	NA	NO	NA	NA	NA	NO	yes
Q9HCD5	418	NCOA5	0.757212	NA	NA	NO	NA	NA	NA	NO	yes
Q9HC78	436	ZBTB20	NA	NA	NA	NO	0.997065	0.999423	NA	YES	no
Q9HC78	465	ZBTB20	NA	NA	NA	NO	0.871035	NA	0.86578	YES	yes
Q9HC35	869	EML4	0.999997	NA	NA	NO	NA	NA	NA	NO	no
Q9HBM6	152	TAF9B	NA	NA	NA	NO	NA	0.852504	NA	NO	yes
Q9HBD1	756	RC3H2	NA	NA	0.805269	NO	NA	NA	NA	NO	no
Q9HBD1	755	RC3H2	NA	NA	NA	NO	NA	0.979661	0.984758	YES	yes
Q9HBD1	897	RC3H2	NA	NA	NA	NO	NA	0.999959	NA	NO	yes
Q9HBD1	468	RC3H2	NA	0.771106	NA	NO	NA	0.982791	0.797646	YES	no
Q9HBD1	471	RC3H2	NA	NA	0.851032	NO	0.836695	0.882758	NA	YES	yes
Q9HBD1	472	RC3H2	NA	NA	0.9718	NO	0.966929	NA	NA	NO	yes
Q9HAW4	718	CLSPN	NA	NA	NA	NO	NA	0.886616	0.991926	YES	no
Q9H7S9	259	ZNF703	0.999996	NA	NA	NO	0.999999	1	0.999999	YES	yes
Q9H7S9	210	ZNF703	NA	NA	NA	NO	0.978974	NA	NA	NO	no
Q9H792	511	PEAK1	0.885319	NA	NA	NO	0.809225	NA	0.838198	YES	yes
Q9H792	510	PEAK1	0.982594	NA	NA	NO	0.781841	NA	NA	NO	no
Q9H4I2	593	ZHX3	NA	NA	0.867479	NO	NA	NA	NA	NO	yes
Q9H4I2	591	ZHX3	NA	0.88585	NA	NO	NA	NA	NA	NO	yes
Q9H4A3	1949	WNK1	NA	NA	NA	NO	NA	0.939905	NA	NO	yes
Q9H4A3	2370	WNK1	NA	NA	NA	NO	NA	0.910595	NA	NO	yes
Q9H4A3	1235	WNK1	NA	NA	NA	NO	0.975617	0.897527	0.925241	YES	yes
Q9H4A3	1245	WNK1	NA	NA	NA	NO	0.855494	NA	0.981059	YES	yes
Q9H4A3	1848	WNK1	NA	NA	0.999114	NO	0.851403	0.994684	0.998873	YES	yes
Q9H4A3	1849	WNK1	NA	NA	0.833888	NO	0.989137	0.93865	0.945134	YES	yes
Q9H4A3	1935	WNK1	NA	NA	NA	NO	0.999111	NA	0.997521	YES	yes
Q9H4A3	1850	WNK1	NA	NA	NA	NO	0.999644	NA	NA	NO	yes
Q9H4A3	2372	WNK1	NA	NA	NA	NO	0.858108	NA	NA	NO	no
Q9H361;P11940	630;635	PABPC3;PABPC1	NA	NA	0.999748	NO	NA	0.998708	NA	NO	yes
Q9H334	448	FOXP1	NA	NA	NA	NO	NA	0.999228	NA	NO	yes
Q9H2Y7	920	ZNF106	NA	NA	NA	NO	1	NA	NA	NO	no
Q9H2Y7	915	ZNF106	NA	NA	NA	NO	1	NA	NA	NO	no
Q9H2P0	358	ADNP	NA	NA	NA	NO	0.999618	NA	0.998389	YES	yes
Q9H2F5	780	EPC1	NA	NA	NA	NO	0.913934	0.909392	0.853435	YES	yes
Q9H1H9	636	KIF13A	NA	NA	1	NO	NA	NA	NA	NO	no
Q9H1B7	169	IRF2BPL	NA	NA	0.999633	NO	NA	NA	NA	NO	yes
Q9H0E9	287	BRD8	NA	NA	0.965228	NO	0.97954	0.80063	0.963367	YES	yes
Q9H0E9	276	BRD8	0.939163	NA	NA	NO	0.989935	NA	NA	NO	yes
Q9H0E9	279	BRD8	NA	NA	NA	NO	0.919651	NA	NA	NO	no
Q9H0E3	321	SAP130	NA	0.948166	NA	NO	NA	NA	NA	NO	no
Q9H0E3	346	SAP130	0.999332	NA	NA	NO	0.999999	0.999445	0.99984	YES	yes
Q9C0K7	335	STRADB	NA	NA	NA	NO	0.997793	NA	NA	NO	no
Q9C0K7	332	STRADB	NA	NA	NA	NO	0.997793	NA	NA	NO	no
Q9BZL6	395	PRKD2	0.941271	NA	NA	NO	NA	NA	NA	NO	no
Q9BZL6	396	PRKD2	0.941271	NA	NA	NO	NA	NA	NA	NO	no
Q9BYJ9	198	YTHDF1	NA	0.983351	NA	NO	NA	NA	NA	NO	yes
Q9BWW4	347	SSBP3	NA	NA	NA	NO	0.999997	NA	NA	NO	yes
Q9BWN1	289	PRR14	NA	NA	NA	NO	NA	1	1	YES	no
Q9BWF3	280	RBM4	NA	NA	NA	NO	0.920893	NA	0.918911	YES	yes
Q9BWF3	315	RBM4	NA	0.956507	NA	NO	0.939478	0.968503	0.954962	YES	no
Q9BTC0	606	DIDO1	NA	NA	NA	NO	NA	0.991927	0.940283	YES	yes
Q9BTA9	456	WAC	NA	NA	NA	NO	NA	0.992746	0.986825	YES	yes
Q9BTA9	391	WAC	NA	NA	NA	NO	0.984657	NA	NA	NO	no
Q9BQC3	467	DPH2	NA	0.917371	NA	NO	0.953105	0.819203	0.804522	YES	yes
Q99856	379	ARID3A	NA	NA	NA	NO	0.913017	NA	NA	NO	yes
Q99700	220	ATXN2	NA	0.877599	NA	NO	NA	0.805141	NA	NO	yes
Q99700	666	ATXN2	NA	0.982469	NA	NO	0.982529	0.992879	NA	YES	yes
Q99627	183	COPS8	NA	NA	NA	NO	1	1	1	YES	yes
Q99614	187	TTC1	1	NA	NA	NO	NA	NA	NA	NO	no
Q99594	156	TEAD3	0.994472	NA	NA	NO	NA	NA	NA	NO	yes
Q96T58	2924	SPEN	NA	NA	NA	NO	NA	0.789262	0.942942	YES	yes
Q96T58	2476	SPEN	NA	NA	0.989292	NO	NA	0.910786	NA	NO	no
Q96T58	2811	SPEN	NA	NA	NA	NO	NA	0.896815	NA	NO	yes
Q96T58	3436	SPEN	NA	NA	NA	NO	NA	0.889388	NA	NO	no
Q96T58	2530	SPEN	NA	NA	NA	NO	NA	0.846453	NA	NO	yes
Q96T58	2548	SPEN	NA	0.96111	NA	NO	NA	NA	NA	NO	no
Q96T58	2586	SPEN	0.995166	NA	NA	NO	0.92372	0.999835	NA	YES	yes
Q96T58	2928	SPEN	NA	NA	NA	NO	0.984325	NA	0.965864	YES	yes
Q96T58	2619	SPEN	NA	NA	NA	NO	0.899918	NA	NA	NO	yes
Q96T58	2460	SPEN	NA	0.79594	NA	NO	0.757414	NA	NA	NO	no
Q96ST3	266	SIN3A	NA	NA	0.994387	NO	NA	NA	NA	NO	no
Q96ST3	251	SIN3A	NA	0.835807	NA	NO	NA	NA	NA	NO	yes
Q96S55	387	WRNIP1	NA	NA	1	NO	NA	NA	NA	NO	no
Q96RT1	1070	ERBB2IP	NA	NA	1	NO	1	1	1	YES	yes
Q96RN5	404	MED15	NA	NA	0.953884	NO	NA	NA	NA	NO	no
Q96RK0	535	CIC	NA	NA	0.881841	NO	NA	NA	NA	NO	yes
Q96RK0	530	CIC	NA	NA	0.919776	NO	NA	NA	NA	NO	no
Q96RK0	534	CIC	0.89719	NA	NA	NO	NA	NA	NA	NO	yes
Q96RK0	665	CIC	NA	NA	NA	NO	0.978776	1	0.999949	YES	yes
Q96RK0	880	CIC	NA	NA	NA	NO	0.994382	0.999966	0.994359	YES	yes
Q96RK0	1002	CIC	NA	NA	NA	NO	0.87631	NA	NA	NO	yes
Q96RK0	738	CIC	NA	NA	NA	NO	0.83185	NA	NA	NO	no
Q96RK0	542	CIC	NA	NA	0.811797	NO	0.763221	NA	NA	NO	yes
Q96QT6	671	PHF12	NA	NA	0.999999	NO	NA	NA	NA	NO	no
Q96QT6	472	PHF12	NA	0.994184	NA	NO	NA	0.999812	0.99938	YES	yes
Q96QT6	617	PHF12	0.768524	NA	NA	NO	NA	NA	NA	NO	no
Q96QT6	684	PHF12	0.873107	NA	NA	NO	NA	NA	NA	NO	no
Q96Q11	112	TRNT1	NA	NA	NA	NO	NA	0.999989	NA	NO	no
Q96PV6	222	LENG8	NA	NA	0.968954	NO	NA	NA	NA	NO	no
Q96PV6	210	LENG8	NA	0.876136	NA	NO	NA	0.806123	NA	NO	yes
Q96PK6	520	RBM14	NA	NA	NA	NO	NA	0.994531	NA	NO	no
Q96PK6	242	RBM14	NA	NA	NA	NO	0.999874	0.97451	0.927328	YES	yes
Q96PK6	518	RBM14	NA	NA	0.822182	NO	0.764437	0.870702	0.810122	YES	yes
Q96PK6	523	RBM14	NA	NA	NA	NO	0.919334	NA	0.912531	YES	no
Q96PK6	527	RBM14	NA	NA	NA	NO	0.987893	NA	NA	NO	yes
Q96P16	285	RPRD1A	NA	NA	NA	NO	NA	0.992403	NA	NO	no
Q96N67	190	DOCK7	NA	NA	NA	NO	0.995919	NA	NA	NO	yes
Q96LU7	723	MYRFL	NA	NA	NA	NO	0.847022	0.861766	NA	YES	yes
Q96L91	3027	EP400	NA	NA	0.968904	NO	NA	0.994455	NA	NO	yes
Q96L91	2708	EP400	NA	NA	NA	NO	NA	0.829328	NA	NO	yes
Q96L91	2707	EP400	NA	NA	NA	NO	NA	0.829328	NA	NO	yes
Q96L91	2696	EP400	0.97371	NA	NA	NO	NA	0.995369	NA	NO	yes
Q96L91	1624	EP400	0.909405	NA	NA	NO	NA	NA	0.930397	NO	no
Q96L91	2716	EP400	NA	0.981841	NA	NO	0.976343	NA	0.902426	YES	yes
Q96L91	2878	EP400	0.994971	NA	NA	NO	0.88953	0.914013	NA	YES	yes
Q96L91	1492	EP400	NA	NA	NA	NO	0.800315	NA	NA	NO	no
Q96KR1	207	ZFR	NA	NA	0.941289	NO	NA	NA	NA	NO	yes
Q96KR1	532	ZFR	NA	NA	NA	NO	NA	0.918019	NA	NO	yes
Q96KR1	102	ZFR	0.999988	NA	NA	NO	NA	0.999999	NA	NO	yes
Q96KR1	429	ZFR	NA	NA	NA	NO	0.998363	NA	NA	NO	yes
Q96KR1	479	ZFR	NA	NA	NA	NO	0.9891	NA	NA	NO	no
Q96KR1	148	ZFR	NA	NA	NA	NO	0.884786	NA	NA	NO	yes
Q96KM6	237	ZNF512B	NA	NA	NA	NO	0.999939	NA	0.991025	YES	yes
Q96JY6	142	PDLIM2	NA	NA	0.771626	NO	NA	NA	NA	NO	yes
Q96JY6	134	PDLIM2	NA	NA	NA	NO	0.956563	NA	NA	NO	yes
Q96JM2	292	ZNF462	NA	0.884545	NA	NO	NA	NA	NA	NO	yes
Q96JF6	774	ZNF594	0.868731	NA	NA	NO	NA	NA	NA	NO	no
Q96IZ7	264	RSRC1	NA	NA	0.770087	NO	NA	0.913933	NA	NO	no
Q96I24	428	FUBP3	NA	NA	NA	NO	NA	0.964171	NA	NO	no
Q96HP0	185	DOCK6	NA	NA	NA	NO	NA	0.99865	NA	NO	no
Q96HC4	309	PDLIM5	0.994181	NA	NA	NO	0.939985	0.999882	NA	YES	yes
Q96HA1;A8CG34	693;670	POM121;POM121C	NA	NA	NA	NO	0.994056	NA	0.999673	YES	yes
Q96HA1;A8CG34	640;617	POM121;POM121C	NA	NA	NA	NO	0.969367	NA	NA	NO	no
Q96HA1	996	POM121	NA	0.914534	NA	NO	0.956157	NA	0.998559	YES	no
Q96DF8	440	DGCR14	NA	NA	NA	NO	0.834592	NA	NA	NO	yes
Q96D71	258	REPS1	0.999847	NA	NA	NO	NA	0.999976	0.99992	YES	yes
Q96CB8	324	INTS12	0.783074	NA	NA	NO	0.843191	NA	NA	NO	yes
Q96BD5	122	PHF21A	NA	0.806933	NA	NO	NA	NA	0.874074	NO	yes
Q96BD5	272	PHF21A	0.853201	NA	NA	NO	NA	NA	NA	NO	yes
Q96BD5	125	PHF21A	0.994987	NA	NA	NO	0.890304	0.920776	0.764385	YES	yes
Q96BD5	142	PHF21A	NA	NA	NA	NO	0.89066	0.846658	0.839939	YES	no
Q96BD5	276	PHF21A	NA	NA	NA	NO	0.856563	NA	0.895922	YES	yes
Q96BD5	124	PHF21A	NA	NA	NA	NO	0.86365	NA	NA	NO	yes
Q96AE7	186	TTC17	1	NA	NA	NO	NA	NA	NA	NO	no
Q96AE4	195	FUBP1	NA	NA	NA	NO	1	NA	NA	NO	yes
Q969V6	295	MKL1	NA	NA	NA	NO	0.999938	0.999859	NA	YES	yes
Q969V3	430	NCLN	NA	NA	1	NO	NA	NA	NA	NO	no
Q93052	209	LPP	NA	NA	NA	NO	NA	0.967925	0.998534	YES	yes
Q93052	211	LPP	NA	NA	NA	NO	0.994852	0.972167	0.938768	YES	yes
Q93009	74	USP7	NA	NA	NA	NO	0.985475	NA	NA	NO	no
Q92841	672	DDX17	NA	NA	NA	NO	NA	0.865071	0.867049	YES	no
Q92793	139	CREBBP	NA	NA	NA	NO	NA	0.84422	NA	NO	no
Q92793	141	CREBBP	0.850601	NA	NA	NO	NA	NA	NA	NO	yes
Q92766	517	RREB1	NA	0.983482	NA	NO	NA	NA	NA	NO	no
Q92750	46	TAF4B	NA	NA	0.999999	NO	NA	NA	NA	NO	no
Q92750	383	TAF4B	NA	NA	NA	NO	NA	0.909766	NA	NO	yes
Q92615	581	LARP4B	NA	NA	NA	NO	NA	0.999204	0.999995	YES	yes
Q92610	514	ZNF592	NA	NA	NA	NO	NA	0.867392	NA	NO	yes
Q92610	950	ZNF592	NA	NA	NA	NO	0.963992	0.974858	0.944164	YES	yes
Q92585	325	MAML1	NA	NA	0.810283	NO	NA	NA	NA	NO	no
Q92585	965	MAML1	NA	NA	1	NO	NA	NA	0.999831	NO	yes
Q92585	335	MAML1	0.876912	NA	NA	NO	NA	NA	NA	NO	no
Q92585	321	MAML1	NA	NA	NA	NO	0.816904	NA	NA	NO	no
Q92576	1758	PHF3	0.997451	NA	NA	NO	NA	NA	NA	NO	no
Q92576	1770	PHF3	NA	NA	NA	NO	0.886013	NA	0.888979	YES	yes
Q92542	419	NCSTN	NA	NA	NA	NO	0.999705	NA	NA	NO	yes
Q92542	505	NCSTN	NA	NA	NA	NO	0.998821	NA	NA	NO	no
Q92541	675	RTF1	NA	NA	NA	NO	NA	0.979262	0.821946	YES	yes
Q92540	624	SMG7	NA	NA	NA	NO	0.999828	0.998662	0.99479	YES	yes
Q92540	632	SMG7	NA	0.900788	NA	NO	0.969159	0.921986	0.834758	YES	no
Q92538	1856	GBF1	NA	NA	NA	NO	NA	0.994669	0.995158	YES	yes
Q8WYQ9	620	ZCCHC14	NA	NA	NA	NO	NA	0.761832	0.986107	YES	no
Q8WYQ9	608	ZCCHC14	NA	0.999962	NA	NO	NA	0.999768	NA	NO	yes
Q8WXI9	497	GATAD2B	NA	NA	NA	NO	NA	0.95137	0.990811	YES	yes
Q8WWM7	268	ATXN2L	NA	NA	NA	NO	0.947096	NA	NA	NO	no
Q8WWI1	822	LMO7	NA	NA	NA	NO	NA	0.927136	NA	NO	yes
Q8WWI1	1576	LMO7	0.853626	NA	NA	NO	NA	NA	0.798879	NO	yes
Q8WWI1	1406	LMO7	NA	NA	NA	NO	0.999965	0.999956	NA	YES	yes
Q8WWI1	1577	LMO7	NA	NA	NA	NO	0.963887	0.952526	0.869006	YES	yes
Q8WWI1	1584	LMO7	NA	0.871891	NA	NO	0.872066	0.79971	0.823213	YES	yes
Q8WVJ2	142	NUDCD2	NA	NA	NA	NO	NA	0.881943	NA	NO	no
Q8WVJ2	146	NUDCD2	NA	NA	NA	NO	0.991081	NA	0.919927	YES	yes
Q8WUH6	73	TMEM263	0.904815	NA	NA	NO	0.912244	NA	0.809398	YES	yes
Q8TF68	80	ZNF384	NA	0.942269	NA	NO	NA	NA	NA	NO	yes
Q8TEW0	437	PARD3	NA	NA	0.80302	NO	NA	NA	0.851027	NO	yes
Q8TEK3	882	DOT1L	NA	NA	NA	NO	1	0.999997	1	YES	no
Q8TDM6	1181	DLG5	NA	NA	NA	NO	0.993977	NA	NA	NO	yes
Q8TCU4	854	ALMS1	NA	0.764111	NA	NO	NA	NA	NA	NO	yes
Q8TCU4	1707	ALMS1	NA	0.822185	NA	NO	NA	0.933553	NA	NO	yes
Q8TCU4	1701	ALMS1	0.819699	NA	NA	NO	NA	NA	NA	NO	no
Q8TCU4	1502	ALMS1	0.999852	NA	NA	NO	0.999988	0.998982	0.99999	YES	yes
Q8TCU4	1511	ALMS1	NA	NA	NA	NO	0.96452	NA	NA	NO	no
Q8TCU4	1235	ALMS1	NA	NA	NA	NO	0.756014	NA	NA	NO	no
Q8NFH5	296	NUP35	0.947994	NA	NA	NO	NA	NA	NA	NO	yes
Q8NFH5	297	NUP35	NA	0.913688	NA	NO	0.962423	NA	NA	NO	yes
Q8NFD5	1573	ARID1B	NA	0.99291	NA	NO	0.833052	0.995336	NA	YES	no
Q8NEZ4	2215	KMT2C	NA	NA	0.996626	NO	NA	NA	NA	NO	no
Q8NEZ4	2308	KMT2C	NA	NA	NA	NO	0.989369	0.824374	NA	YES	yes
Q8NEZ4	2230	KMT2C	NA	NA	NA	NO	0.999999	NA	NA	NO	yes
Q8NEZ2	169	VPS37A	NA	0.924831	NA	NO	NA	NA	NA	NO	yes
Q8NEZ2	172	VPS37A	0.908947	NA	NA	NO	NA	NA	NA	NO	yes
Q8NEZ2	178	VPS37A	0.918818	NA	NA	NO	NA	0.886688	NA	NO	yes
Q8NEY1	757	NAV1	NA	NA	NA	NO	NA	0.997663	NA	NO	no
Q8NEY1	763	NAV1	NA	NA	NA	NO	NA	0.988123	NA	NO	no
Q8NEY1	764	NAV1	NA	NA	NA	NO	NA	0.988123	NA	NO	no
Q8NDX5	674	PHC3	0.921848	NA	NA	NO	NA	NA	NA	NO	yes
Q8NDV7	1679	TNRC6A	NA	0.900185	NA	NO	NA	NA	NA	NO	no
Q8NDV7	1691	TNRC6A	NA	0.811975	NA	NO	NA	NA	NA	NO	no
Q8NDV7	1686	TNRC6A	NA	NA	NA	NO	0.995791	NA	0.937127	YES	yes
Q8NBK3	142	SUMF1	NA	NA	0.913764	NO	0.993405	NA	0.774704	YES	yes
Q8N6T3	141	ARFGAP1	NA	NA	NA	NO	0.999996	NA	NA	NO	yes
Q8N684	212	CPSF7	NA	NA	NA	NO	NA	0.999859	NA	NO	yes
Q8N5L8	85	RPP25L	NA	1	NA	NO	NA	NA	NA	NO	no
Q8N465	60	D2HGDH	0.999703	NA	NA	NO	NA	NA	NA	NO	no
Q8N465	61	D2HGDH	0.996226	NA	NA	NO	NA	NA	NA	NO	no
Q8N122	700	RPTOR	NA	NA	0.824135	NO	0.956246	NA	NA	NO	yes
Q8IZW8	154	TNS4	NA	0.919316	NA	NO	NA	NA	NA	NO	no
Q8IZV2	14	CMTM8	NA	0.779437	NA	NO	NA	NA	NA	NO	no
Q8IZL8	712	PELP1	0.996517	NA	NA	NO	NA	NA	NA	NO	no
Q8IZH2	1629	XRN1	NA	NA	NA	NO	NA	0.899681	NA	NO	yes
Q8IZH2	1702	XRN1	NA	NA	NA	NO	0.920614	NA	NA	NO	yes
Q8IZC4	92	RTKN2	1	NA	NA	NO	NA	NA	NA	NO	no
Q8IZ21	191	PHACTR4	NA	NA	NA	NO	0.817538	0.84342	0.957858	YES	yes
Q8IY33	488	MICALL2	NA	0.997416	NA	NO	NA	NA	NA	NO	yes
Q8IXW5	123	RPAP2	NA	NA	0.999737	NO	NA	NA	NA	NO	no
Q8IWZ3	1813	ANKHD1	NA	0.819937	NA	NO	NA	0.902345	0.908198	YES	yes
Q8IWZ3	1653	ANKHD1	NA	0.912535	NA	NO	NA	NA	NA	NO	no
Q8IWZ3	1816	ANKHD1	0.835838	NA	NA	NO	NA	NA	NA	NO	yes
Q8IWZ3	1817	ANKHD1	0.804619	NA	NA	NO	NA	NA	NA	NO	yes
Q8IWZ3	1656	ANKHD1	NA	NA	NA	NO	0.998971	NA	0.996816	YES	yes
Q8IWZ3	1799	ANKHD1	NA	NA	NA	NO	0.98954	0.968744	0.966944	YES	yes
Q8IWI9	1663	MGA	0.960043	NA	NA	NO	NA	NA	NA	NO	yes
Q8IWI9	1866	MGA	NA	NA	NA	NO	0.997844	NA	0.999838	YES	yes
Q8IWB9	170	TEX2	NA	NA	NA	NO	NA	0.997846	NA	NO	no
Q8IWB9	175	TEX2	0.993807	NA	NA	NO	0.926697	0.911718	0.851722	YES	yes
Q8IVW6	558	ARID3B	NA	NA	NA	NO	0.970857	0.960101	0.994597	YES	yes
Q8IVT2	178	MISP	NA	NA	0.991011	NO	NA	NA	NA	NO	yes
Q8IVL1	1552	NAV2	NA	0.863637	NA	NO	NA	0.79138	0.770183	YES	yes
Q8IVL1	1549	NAV2	NA	NA	NA	NO	0.862635	0.898965	0.89434	YES	yes
Q8IVL1	1545	NAV2	0.893189	NA	NA	NO	0.972622	NA	NA	NO	no
Q8IVH2	390	FOXP4	NA	NA	NA	NO	0.865868	0.861454	NA	YES	yes
Q8IUG5	2155	MYO18B	NA	NA	NA	NO	NA	0.978552	NA	NO	no
Q8IUD6	278	RNF135	NA	0.913197	NA	NO	NA	NA	NA	NO	no
Q86YP4	182	GATAD2A	NA	NA	NA	NO	NA	0.986754	0.995241	YES	yes
Q86YP4	586	GATAD2A	NA	NA	0.796938	NO	NA	0.916098	NA	NO	yes
Q86YP4	327	GATAD2A	NA	0.885523	NA	NO	NA	NA	NA	NO	yes
Q86YP4	589	GATAD2A	0.927482	NA	NA	NO	0.996798	NA	0.995764	YES	yes
Q86YP4	625	GATAD2A	NA	NA	0.993179	NO	0.999998	0.999999	1	YES	yes
Q86YP4	175	GATAD2A	NA	0.978015	NA	NO	0.984495	NA	NA	NO	no
Q86Y37	118	CACUL1	NA	NA	NA	NO	NA	0.771754	0.815085	YES	yes
Q86XN7	602	PROSER1	NA	NA	0.837026	NO	0.91007	0.909192	0.892866	YES	yes
Q86VV8	2194	RTTN	NA	NA	NA	NO	NA	1	NA	NO	no
Q86V48	785	LUZP1	NA	NA	NA	NO	NA	1	NA	NO	yes
Q86UE4	495	MTDH	NA	NA	NA	NO	0.787567	NA	NA	NO	no
Q86SU0	342	ILDR1	NA	NA	NA	NO	NA	0.994251	0.998359	YES	no
Q7Z5L9	383	IRF2BP2	NA	NA	NA	NO	NA	0.991792	NA	NO	yes
Q7Z5L9	217	IRF2BP2	NA	0.953975	NA	NO	0.996251	0.908327	NA	YES	yes
Q7Z589	574	EMSY	NA	NA	NA	NO	NA	0.942834	NA	NO	yes
Q7Z589	271	EMSY	NA	0.911207	NA	NO	NA	0.91711	0.886812	YES	yes
Q7Z589	262	EMSY	0.922727	NA	NA	NO	NA	0.871943	NA	NO	yes
Q7Z589	228	EMSY	1	NA	NA	NO	NA	NA	1	NO	yes
Q7Z589	535	EMSY	NA	NA	NA	NO	0.932417	0.822882	0.875247	YES	yes
Q7Z589	557	EMSY	NA	NA	0.931953	NO	0.921356	0.90821	0.902977	YES	yes
Q7Z589	236	EMSY	NA	NA	0.990212	NO	0.810552	NA	NA	NO	yes
Q7Z589	270	EMSY	NA	NA	NA	NO	0.792912	NA	NA	NO	yes
Q7Z589	1088	EMSY	NA	NA	NA	NO	0.881655	NA	NA	NO	no
Q7Z589	561	EMSY	NA	NA	NA	NO	0.788711	NA	NA	NO	yes
Q7Z460	579	CLASP1	0.884548	NA	NA	NO	0.934586	0.917292	0.937817	YES	yes
Q7Z434	365	MAVS	NA	0.948762	NA	NO	NA	NA	NA	NO	yes
Q7Z434	284	MAVS	NA	0.787493	NA	NO	NA	NA	NA	NO	no
Q7Z434	321	MAVS	0.896855	NA	NA	NO	0.913014	NA	NA	NO	no
Q7Z434	366	MAVS	0.851189	NA	NA	NO	0.917996	NA	NA	NO	yes
Q7Z3K3	434	POGZ	NA	NA	0.894511	NO	NA	NA	NA	NO	yes
Q7Z3K3	289	POGZ	NA	NA	0.966998	NO	NA	NA	0.995552	NO	yes
Q7Z3K3	699	POGZ	NA	NA	NA	NO	NA	0.831694	NA	NO	yes
Q7Z3K3	251	POGZ	NA	0.884563	NA	NO	NA	NA	NA	NO	yes
Q7Z3K3	266	POGZ	0.789915	NA	NA	NO	NA	0.882467	0.878066	YES	yes
Q7Z3K3	429	POGZ	NA	NA	NA	NO	0.996165	0.999437	NA	YES	yes
Q7Z3J3;A6NKT7;Q99666;O14715;P0DJD0;P0DJD1;P49792	979;979;978;978;963;971;1954	RGPD4;RGPD3;RGPD5;RGPD8;RGPD1;RGPD2;RANBP2	0.832102	NA	NA	NO	NA	NA	NA	NO	no
Q7Z3J3;A6NKT7;Q99666;O14715;P0DJD0;P0DJD1	1518;1518;1517;1517;1502;1510	RGPD4;RGPD3;RGPD5;RGPD8;RGPD1;RGPD2	NA	NA	NA	NO	NA	0.976835	0.995829	YES	no
Q7LBC6	657	KDM3B	NA	0.942285	NA	NO	NA	NA	NA	NO	yes
Q7LBC6	651	KDM3B	NA	NA	NA	NO	0.864193	NA	NA	NO	yes
Q70E73	799	RAPH1	NA	NA	0.839011	NO	NA	NA	NA	NO	yes
Q6ZRS2	1186	SRCAP	NA	NA	NA	NO	NA	0.995495	NA	NO	no
Q6ZNB6	57	NFXL1	NA	NA	0.995767	NO	NA	NA	NA	NO	yes
Q6YHU6	169	THADA	NA	NA	NA	NO	1	NA	NA	NO	no
Q6XZF7	511	DNMBP	0.995113	NA	NA	NO	NA	NA	NA	NO	no
Q6VMQ6	992	ATF7IP	NA	NA	NA	NO	0.980507	NA	NA	NO	yes
Q6VMQ6	988	ATF7IP	NA	0.888558	NA	NO	0.980285	NA	NA	NO	no
Q6VMQ6	877	ATF7IP	NA	NA	NA	NO	0.974877	NA	NA	NO	yes
Q6UVJ0	347	SASS6	NA	0.998947	NA	NO	NA	NA	NA	NO	no
Q6UVJ0	500	SASS6	NA	NA	NA	NO	0.883947	0.87831	0.91152	YES	yes
Q6PKG0	770	LARP1	NA	NA	NA	NO	NA	0.85895	NA	NO	yes
Q6PKG0	769	LARP1	NA	NA	NA	NO	0.764137	NA	NA	NO	no
Q6PJT7	389	ZC3H14	NA	NA	0.957373	NO	NA	NA	NA	NO	yes
Q6PJT7	202	ZC3H14	NA	NA	0.999402	NO	NA	0.982546	0.961785	YES	yes
Q6PJT7	204	ZC3H14	NA	0.982885	NA	NO	NA	0.998592	NA	NO	no
Q6PJT7	132	ZC3H14	0.889545	NA	NA	NO	NA	0.915426	0.913439	YES	yes
Q6PJT7	134	ZC3H14	NA	NA	0.900741	NO	0.915105	NA	NA	NO	yes
Q6PJT7	325	ZC3H14	NA	NA	NA	NO	0.882192	NA	NA	NO	no
Q6P4R8	1283	NFRKB	NA	NA	0.912103	NO	NA	NA	NA	NO	no
Q6P4R8	1151	NFRKB	NA	NA	0.767918	NO	NA	NA	NA	NO	yes
Q6P4R8	1146	NFRKB	NA	NA	NA	NO	NA	0.876205	0.944959	YES	no
Q6P4R8	750	NFRKB	NA	NA	NA	NO	NA	0.84872	NA	NO	yes
Q6P4R8	1154	NFRKB	NA	NA	NA	NO	NA	0.802405	NA	NO	yes
Q6P4R8	1045	NFRKB	NA	NA	0.963537	NO	NA	0.999795	NA	NO	no
Q6P4R8	1282	NFRKB	NA	0.840457	NA	NO	NA	NA	NA	NO	no
Q6P4R8	1027	NFRKB	NA	0.862143	NA	NO	0.980571	NA	0.907862	YES	yes
Q6P4R8	1168	NFRKB	NA	NA	NA	NO	0.987623	0.981899	0.975071	YES	yes
Q6P4R8	1067	NFRKB	1	NA	NA	NO	1	NA	NA	NO	yes
Q6P4R8	1130	NFRKB	0.980427	NA	NA	NO	0.999403	NA	NA	NO	yes
Q6P4R8	1224	NFRKB	NA	NA	NA	NO	0.896768	NA	NA	NO	no
Q6P4R8	1174	NFRKB	NA	NA	NA	NO	0.794123	NA	NA	NO	yes
Q6P4R8	905	NFRKB	NA	NA	NA	NO	0.798927	NA	NA	NO	no
Q6P4R8	1173	NFRKB	NA	NA	NA	NO	0.787399	NA	NA	NO	yes
Q6P2S7	899	GNN	NA	NA	NA	NO	0.977827	NA	NA	NO	no
Q6NXT4	367	SLC30A6	0.815494	NA	NA	NO	NA	NA	NA	NO	no
Q6NXT4	375	SLC30A6	NA	NA	NA	NO	0.865886	NA	0.762724	YES	yes
Q6NXT4	374	SLC30A6	NA	0.881802	NA	NO	0.992991	NA	NA	NO	yes
Q6NUQ1	70	RINT1	NA	NA	1	NO	NA	NA	NA	NO	no
Q6MZP7	235	LIN54	NA	NA	NA	NO	NA	0.864125	NA	NO	yes
Q6MZP7	237	LIN54	NA	0.799145	NA	NO	NA	NA	NA	NO	yes
Q6MZP7	261	LIN54	NA	NA	NA	NO	0.888298	NA	0.930658	YES	no
Q6MZP7	321	LIN54	0.992222	NA	NA	NO	0.997996	0.997506	NA	YES	yes
Q6MZP7	338	LIN54	NA	NA	NA	NO	0.99978	0.99019	0.971647	YES	no
Q6MZP7	423	LIN54	NA	NA	NA	NO	0.891935	0.905746	0.860232	YES	no
Q6MZP7	368	LIN54	0.784898	NA	NA	NO	0.821222	NA	NA	NO	yes
Q6MZP7	238	LIN54	NA	NA	NA	NO	0.877556	NA	NA	NO	yes
Q6MZP7	286	LIN54	NA	NA	NA	NO	0.891008	NA	NA	NO	no
Q6KC79	160	NIPBL	NA	0.979932	NA	NO	NA	0.99719	NA	NO	yes
Q6IQ23	121	PLEKHA7	NA	NA	NA	NO	0.883157	NA	NA	NO	no
Q6IE81	531	JADE1	1	NA	NA	NO	NA	NA	NA	NO	no
Q6AI12	214	ANKRD40	NA	NA	NA	NO	0.972326	NA	NA	NO	yes
Q68DE3	1926	KIAA2018	NA	NA	NA	NO	0.999461	NA	NA	NO	no
Q68CP9	631	ARID2	NA	NA	0.956773	NO	NA	NA	NA	NO	no
Q63HR2	950	TNS2	NA	NA	NA	NO	0.881051	NA	NA	NO	yes
Q5XG87	769	PAPD7	NA	NA	NA	NO	0.949105	NA	NA	NO	yes
Q5VWN6	967	FAM208B	NA	0.989024	NA	NO	NA	NA	NA	NO	yes
Q5VWN6	1595	FAM208B	0.917853	NA	NA	NO	NA	NA	NA	NO	yes
Q5VUA4	1693	ZNF318	NA	NA	NA	NO	NA	0.999889	NA	NO	no
Q5VUA4	1328	ZNF318	NA	NA	NA	NO	NA	0.850441	NA	NO	no
Q5VUA4	1333	ZNF318	NA	NA	NA	NO	NA	0.833779	NA	NO	yes
Q5VUA4	1342	ZNF318	NA	NA	NA	NO	0.939481	0.830551	NA	YES	yes
Q5VUA4	866	ZNF318	NA	NA	NA	NO	0.993189	0.995995	0.998398	YES	yes
Q5VUA4	1341	ZNF318	NA	NA	NA	NO	0.943392	NA	NA	NO	yes
Q5VT52	476	RPRD2	NA	NA	NA	NO	NA	0.951486	NA	NO	yes
Q5VT52	999	RPRD2	NA	NA	NA	NO	NA	0.894925	NA	NO	no
Q5VT52	604	RPRD2	0.867872	NA	NA	NO	NA	0.788362	0.837572	YES	yes
Q5TGY3	1074	AHDC1	NA	0.851354	NA	NO	NA	NA	NA	NO	no
Q5TC84	415	OGFRL1	NA	NA	NA	NO	0.987851	NA	NA	NO	no
Q5T8P6	690	RBM26	NA	0.846284	NA	NO	NA	NA	NA	NO	yes
Q5T6F2	485	UBAP2	NA	NA	0.908095	NO	NA	0.863841	NA	NO	yes
Q5T6F2	494	UBAP2	NA	0.990876	NA	NO	NA	0.919056	0.997514	YES	yes
Q5T6F2	1006	UBAP2	0.914273	NA	NA	NO	NA	NA	0.99422	NO	yes
Q5T6F2	633	UBAP2	0.777904	NA	NA	NO	NA	NA	0.859447	NO	yes
Q5T6F2	427	UBAP2	NA	NA	NA	NO	0.999999	0.999965	0.994652	YES	yes
Q5T6F2	487	UBAP2	NA	NA	NA	NO	0.938295	0.946287	NA	YES	yes
Q5T3J3	167	LRIF1	NA	NA	0.981186	NO	NA	NA	0.995257	NO	yes
Q5T3J3	51	LRIF1	NA	0.88805	NA	NO	NA	0.926269	0.933005	YES	yes
Q5T1R4	516	HIVEP3	0.999013	NA	NA	NO	NA	NA	NA	NO	no
Q5T1N1	287	AKNAD1	NA	NA	0.880397	NO	NA	NA	NA	NO	no
Q5T1M5	330	FKBP15	NA	NA	0.76042	NO	NA	NA	NA	NO	no
Q5T0B9	130	ZNF362	NA	NA	0.904656	NO	NA	NA	NA	NO	yes
Q5T0B9	128	ZNF362	NA	NA	NA	NO	NA	0.791645	NA	NO	yes
Q5T0B9	113	ZNF362	NA	NA	NA	NO	0.883931	NA	NA	NO	yes
Q5JTW2	622	CEP78	NA	0.88059	NA	NO	NA	NA	NA	NO	yes
Q5JRA6	591	MIA3	NA	1	NA	NO	0.999926	NA	1	YES	yes
Q5HYK7	99	SH3D19	NA	NA	0.980051	NO	0.999999	0.999945	0.999914	YES	yes
Q4VCS5	195	AMOT	NA	NA	NA	NO	0.990993	0.979733	NA	YES	yes
Q4L180	1108	FILIP1L	NA	NA	NA	NO	0.999825	0.920387	0.997921	YES	yes
Q4KMQ1	654	TPRN	NA	0.913865	NA	NO	NA	NA	NA	NO	yes
Q4KMP7	44	TBC1D10B	NA	NA	NA	NO	NA	0.837108	NA	NO	no
Q3YBR2	2	TBRG1	NA	NA	NA	NO	NA	1	NA	NO	no
Q3YBR2	9	TBRG1	NA	NA	NA	NO	NA	1	NA	NO	no
Q3YBR2	10	TBRG1	NA	NA	NA	NO	NA	1	NA	NO	no
Q3MJ13	212	WDR72	0.983408	NA	NA	NO	NA	NA	NA	NO	no
Q2TAL8	364	QRICH1	0.989677	NA	NA	NO	0.9904	0.941691	0.840995	YES	yes
Q2M2I8	360	AAK1	0.93114	NA	NA	NO	0.99605	0.988727	NA	YES	yes
Q2KHR3	660	QSER1	NA	NA	NA	NO	NA	0.99828	0.954728	YES	no
Q2KHR3	131	QSER1	NA	NA	0.994437	NO	0.935069	0.996647	NA	YES	yes
Q2KHR3	17	QSER1	NA	NA	NA	NO	0.961339	0.951682	0.999764	YES	yes
Q2KHR3	1283	QSER1	NA	0.930916	NA	NO	0.791694	NA	NA	NO	no
Q17RS7	759	GEN1	NA	NA	0.751322	NO	NA	NA	NA	NO	no
Q17RS7	753	GEN1	NA	0.903804	NA	NO	NA	NA	NA	NO	no
Q16594	194	TAF9	NA	NA	NA	NO	0.984487	NA	NA	NO	yes
Q16186	211	ADRM1	0.868719	NA	NA	NO	NA	NA	NA	NO	yes
Q16186	219	ADRM1	0.922616	NA	NA	NO	NA	NA	NA	NO	yes
Q15942	11	ZYX	NA	0.921907	NA	NO	NA	NA	NA	NO	yes
Q15788	638	NCOA1	NA	NA	NA	NO	NA	0.834109	NA	NO	no
Q15751	1840	HERC1	0.999987	NA	NA	NO	NA	NA	NA	NO	no
Q15750	391	TAB1	0.997799	NA	NA	NO	NA	NA	NA	NO	yes
Q15750	502	TAB1	NA	0.997064	NA	NO	0.999551	NA	0.994659	YES	yes
Q15750	399	TAB1	NA	NA	NA	NO	0.851538	NA	NA	NO	yes
Q15723	500	ELF2	NA	NA	NA	NO	NA	0.9844	NA	NO	yes
Q15723	372	ELF2	NA	NA	NA	NO	NA	0.9386	NA	NO	no
Q15723	497	ELF2	NA	NA	NA	NO	0.995482	0.866192	NA	YES	yes
Q15723	572	ELF2	NA	NA	NA	NO	0.990435	NA	NA	NO	yes
Q15723	400	ELF2	NA	0.880183	NA	NO	0.888606	NA	NA	NO	yes
Q15723	412	ELF2	NA	NA	NA	NO	0.756486	NA	NA	NO	no
Q15714	439	TSC22D1	NA	NA	NA	NO	1	NA	1	YES	yes
Q15654	156	TRIP6	NA	NA	0.769942	NO	NA	NA	NA	NO	yes
Q15652	1091	JMJD1C	NA	NA	NA	NO	NA	0.778817	NA	NO	yes
Q15652	699	JMJD1C	NA	NA	NA	NO	NA	0.958401	NA	NO	no
Q15652	1379	JMJD1C	NA	NA	NA	NO	NA	0.8923	NA	NO	no
Q15652	1087	JMJD1C	0.897566	NA	NA	NO	0.947137	0.989342	0.995213	YES	yes
Q15652	969	JMJD1C	NA	NA	NA	NO	0.992545	0.999952	NA	YES	no
Q15652	1185	JMJD1C	NA	NA	NA	NO	0.912731	NA	NA	NO	no
Q15648	1263	MED1	NA	0.773404	NA	NO	NA	NA	NA	NO	no
Q15413	3797	RYR3	NA	NA	NA	NO	1	NA	NA	NO	no
Q15413	3803	RYR3	NA	NA	NA	NO	1	NA	NA	NO	no
Q15032	377	R3HDM1	NA	NA	NA	NO	1	1	1	YES	yes
Q14980	2092	NUMA1	0.912073	NA	NA	NO	0.986567	NA	NA	NO	yes
Q14966	789	ZNF638	NA	NA	NA	NO	NA	0.826567	NA	NO	yes
Q14896	384	MYBPC3	NA	NA	NA	NO	1	NA	NA	NO	no
Q14847	182	LASP1	NA	0.766633	NA	NO	NA	NA	NA	NO	yes
Q14686	1932	NCOA6	NA	NA	0.914196	NO	NA	NA	NA	NO	yes
Q14684	731	RRP1B	NA	0.791653	NA	NO	NA	NA	0.913794	NO	yes
Q14684	730	RRP1B	NA	NA	NA	NO	0.765564	NA	0.875193	YES	yes
Q14676	1582	MDC1	NA	NA	NA	NO	NA	0.766139	NA	NO	no
Q14247	331	CTTN	NA	0.996434	NA	NO	0.987205	0.958867	NA	YES	yes
Q14247	345	CTTN	NA	NA	NA	NO	0.987403	0.901559	NA	YES	yes
Q14161	556	GIT2	NA	NA	NA	NO	NA	0.992122	NA	NO	yes
Q14161	555	GIT2	NA	0.999792	NA	NO	NA	NA	NA	NO	yes
Q14161	551	GIT2	0.943937	NA	NA	NO	NA	NA	0.994188	NO	no
Q14157	262	UBAP2L	NA	NA	NA	NO	NA	0.988532	NA	NO	yes
Q14157	444	UBAP2L	NA	NA	0.776733	NO	NA	0.886782	NA	NO	yes
Q14157	357	UBAP2L	NA	NA	NA	NO	NA	0.813653	NA	NO	yes
Q14157	425	UBAP2L	NA	NA	NA	NO	NA	0.975474	NA	NO	yes
Q14157	429	UBAP2L	NA	NA	NA	NO	NA	0.798437	NA	NO	yes
Q14157	325	UBAP2L	0.862617	NA	NA	NO	0.95586	0.786207	NA	YES	yes
Q14119	110	VEZF1	NA	NA	0.861456	NO	0.913106	NA	0.868191	YES	yes
Q14106	170	TOB2	NA	NA	NA	NO	0.999998	1	NA	YES	yes
Q14004	1286	CDK13	NA	0.930252	NA	NO	NA	0.892183	NA	NO	yes
Q13698	346	CACNA1S	NA	NA	1	NO	NA	NA	NA	NO	no
Q13698	349	CACNA1S	NA	NA	1	NO	NA	NA	NA	NO	no
Q13625	328	TP53BP2	NA	NA	NA	NO	NA	0.81116	0.818467	YES	yes
Q13620	152	CUL4B	NA	NA	NA	NO	NA	0.869753	0.941639	YES	yes
Q13576	599	IQGAP2	NA	NA	NA	NO	NA	0.999811	NA	NO	no
Q13576	596	IQGAP2	NA	NA	NA	NO	NA	0.988528	NA	NO	no
Q13576	595	IQGAP2	NA	NA	NA	NO	NA	0.896543	NA	NO	no
Q13546	331	RIPK1	0.88244	NA	NA	NO	NA	NA	0.861506	NO	yes
Q13530	307	SERINC3	NA	NA	0.821138	NO	NA	NA	NA	NO	no
Q13492	370	PICALM	NA	NA	NA	NO	NA	0.89756	NA	NO	yes
Q13492	453	PICALM	0.882326	NA	NA	NO	0.93396	0.99313	0.868713	YES	yes
Q13310	643	PABPC4	NA	0.911587	NA	NO	0.893657	0.893657	NA	YES	yes
Q13283	262	G3BP1	NA	NA	NA	NO	NA	0.99892	NA	NO	yes
Q13207	629	TBX2	NA	NA	NA	NO	0.934284	0.988747	0.921059	YES	no
Q12948	320	FOXC1	NA	0.999254	NA	NO	0.992713	NA	NA	NO	yes
Q12882	65	DPYD	NA	NA	1	NO	NA	NA	NA	NO	no
Q12882	66	DPYD	NA	NA	1	NO	NA	NA	NA	NO	no
Q12857	329	NFIA	NA	0.834138	NA	NO	NA	NA	NA	NO	no
Q12830	2233	BPTF	NA	NA	NA	NO	NA	0.766001	0.993456	YES	yes
Q12830	1712	BPTF	NA	NA	NA	NO	NA	0.908756	NA	NO	yes
Q12830	1762	BPTF	NA	NA	NA	NO	NA	0.960389	NA	NO	no
Q12830	2345	BPTF	NA	NA	NA	NO	NA	0.861617	NA	NO	no
Q12830	2230	BPTF	NA	0.917641	NA	NO	NA	NA	NA	NO	yes
Q12830	2058	BPTF	NA	0.85401	NA	NO	NA	0.790838	NA	NO	yes
Q12830	2059	BPTF	NA	0.85401	NA	NO	NA	0.790838	NA	NO	yes
Q12830	2103	BPTF	NA	0.836068	NA	NO	NA	0.998704	NA	NO	yes
Q12830	2346	BPTF	0.918955	NA	NA	NO	NA	NA	NA	NO	yes
Q12830	2343	BPTF	0.891098	NA	NA	NO	NA	0.774017	NA	NO	no
Q12830	1709	BPTF	NA	NA	0.99564	NO	0.995482	NA	0.977895	YES	yes
Q12830	2081	BPTF	NA	0.999927	NA	NO	0.999566	NA	0.998666	YES	yes
Q12830	2098	BPTF	NA	0.99944	NA	NO	0.917512	NA	NA	NO	yes
Q12815	243	TROAP	NA	NA	0.988874	NO	NA	NA	NA	NO	yes
Q12778	648	FOXO1	NA	NA	NA	NO	0.771273	NA	NA	NO	yes
Q0JRZ9	488	FCHO2	0.775432	NA	NA	NO	NA	NA	NA	NO	no
Q09666	5386	AHNAK	0.99991	NA	NA	NO	NA	NA	NA	NO	yes
Q07912	817	TNK2	NA	NA	0.887443	NO	NA	NA	NA	NO	no
Q07912	814	TNK2	NA	0.902764	NA	NO	NA	0.886137	NA	NO	yes
Q06546	275	GABPA	NA	NA	NA	NO	NA	0.999992	NA	NO	yes
Q05209	630	PTPN12	NA	0.777066	NA	NO	NA	NA	NA	NO	no
Q05209	626	PTPN12	NA	NA	NA	NO	0.80377	NA	NA	NO	no
Q04726	333	TLE3	0.82404	NA	NA	NO	NA	0.971254	NA	NO	yes
Q04637	1058	EIF4G1	NA	NA	NA	NO	0.978972	0.994461	0.996256	YES	yes
Q03164	3210	KMT2A	NA	NA	0.883545	NO	NA	NA	NA	NO	no
Q03164	3050	KMT2A	0.911155	NA	NA	NO	NA	0.908589	0.963401	YES	no
Q02086	187	SP2	0.934459	NA	NA	NO	NA	0.977591	NA	NO	no
Q02078	281	MEF2A	NA	NA	NA	NO	0.859983	NA	NA	NO	yes
Q01196	295	RUNX1	NA	NA	NA	NO	NA	0.98815	NA	NO	no
Q01082	2317	SPTBN1	NA	0.774552	NA	NO	NA	NA	NA	NO	yes
Q00839	187	HNRNPU	NA	NA	NA	NO	NA	0.914889	NA	NO	yes
Q00839	197	HNRNPU	NA	NA	0.997734	NO	0.999815	0.999999	0.999942	YES	yes
P98171	199	ARHGAP4	NA	NA	NA	NO	NA	0.835093	NA	NO	yes
P98171	202	ARHGAP4	NA	0.816566	NA	NO	NA	NA	NA	NO	yes
P98082	727	DAB2	NA	NA	NA	NO	0.999965	0.999155	0.995855	YES	yes
P85037	644	FOXK1	NA	NA	0.776154	NO	NA	NA	NA	NO	yes
P85037	681	FOXK1	NA	0.914347	NA	NO	NA	NA	NA	NO	yes
P85037	530	FOXK1	NA	NA	NA	NO	0.87911	NA	NA	NO	yes
P78364	555	PHC1	NA	NA	NA	NO	0.979305	NA	NA	NO	yes
P78337	188	PITX1	0.999921	NA	NA	NO	0.999995	NA	NA	NO	yes
P78312	707	FAM193A	NA	NA	NA	NO	0.905907	NA	NA	NO	yes
P62072	87	TIMM10	NA	NA	NA	NO	NA	0.999315	NA	NO	no
P61964	82	WDR5	NA	1	NA	NO	NA	NA	NA	NO	no
P59923	919	ZNF445	NA	NA	NA	NO	NA	1	NA	NO	no
P57740	67	NUP107	NA	NA	NA	NO	0.89192	NA	NA	NO	yes
P55265	391	ADAR	0.916333	NA	NA	NO	NA	NA	NA	NO	yes
P55265	397	ADAR	NA	NA	NA	NO	0.865944	NA	NA	NO	yes
P55198	507	MLLT6	NA	NA	NA	NO	NA	0.872866	NA	NO	yes
P55198	401	MLLT6	NA	NA	NA	NO	1	1	NA	YES	yes
P55198	572	MLLT6	NA	NA	NA	NO	0.871017	0.984519	0.845946	YES	no
P55198	573	MLLT6	NA	NA	NA	NO	0.830713	NA	0.790373	YES	no
P55197	341	MLLT10	NA	NA	NA	NO	NA	0.889336	NA	NO	no
P55197	266	MLLT10	0.936203	NA	NA	NO	NA	NA	NA	NO	no
P52948	568	NUP98	NA	NA	0.911137	NO	NA	NA	0.972875	NO	yes
P52948	263	NUP98	NA	0.887865	NA	NO	NA	NA	NA	NO	yes
P52948	264	NUP98	0.881056	NA	NA	NO	NA	0.932079	NA	NO	yes
P52948	268	NUP98	NA	NA	NA	NO	0.970746	NA	0.803006	YES	yes
P52594	304	AGFG1	NA	NA	NA	NO	NA	0.784536	NA	NO	yes
P52594	368	AGFG1	NA	NA	NA	NO	0.757628	NA	0.961921	YES	yes
P52306	413	RAP1GDS1	NA	NA	NA	NO	1	NA	NA	NO	no
P51610	634	HCFC1	NA	NA	0.968716	NO	NA	NA	NA	NO	yes
P51610	495	HCFC1	NA	NA	NA	NO	NA	0.958224	0.985485	YES	yes
P51610	695	HCFC1	NA	NA	NA	NO	NA	0.97679	NA	NO	yes
P51610	746	HCFC1	NA	NA	NA	NO	NA	0.969357	NA	NO	yes
P51610	739	HCFC1	NA	0.940482	NA	NO	NA	NA	NA	NO	yes
P51610	698	HCFC1	NA	0.930383	NA	NO	NA	NA	NA	NO	yes
P51610	1486	HCFC1	NA	0.890801	NA	NO	NA	NA	NA	NO	yes
P51610	1488	HCFC1	NA	0.945574	NA	NO	NA	0.782637	NA	NO	yes
P51610	738	HCFC1	0.777885	NA	NA	NO	NA	NA	NA	NO	yes
P51610	1058	HCFC1	0.851123	NA	NA	NO	0.893462	NA	0.97562	YES	yes
P51610	1162	HCFC1	NA	NA	NA	NO	1	1	0.999998	YES	yes
P51610	678	HCFC1	NA	NA	NA	NO	0.999591	0.999926	NA	YES	yes
P51610	808	HCFC1	NA	NA	NA	NO	0.98642	NA	0.780326	YES	yes
P51610	603	HCFC1	NA	NA	NA	NO	0.999809	NA	NA	NO	yes
P51610	666	HCFC1	NA	NA	NA	NO	0.907347	NA	NA	NO	yes
P51610	496	HCFC1	NA	NA	NA	NO	0.898726	NA	NA	NO	yes
P51610	587	HCFC1	NA	NA	NA	NO	0.852192	NA	NA	NO	yes
P51610	518	HCFC1	NA	NA	NA	NO	0.776915	NA	NA	NO	yes
P51610	749	HCFC1	NA	NA	NA	NO	0.952878	NA	NA	NO	yes
P51003	698	PAPOLA	NA	NA	0.821546	NO	NA	NA	NA	NO	no
P51003	699	PAPOLA	NA	0.921609	NA	NO	NA	NA	0.848441	NO	yes
P51003	628	PAPOLA	NA	NA	NA	NO	0.863329	NA	NA	NO	no
P50616	171	TOB1	NA	NA	NA	NO	0.993954	NA	NA	NO	no
P50539	104	MXI1	NA	NA	NA	NO	1	NA	NA	NO	no
P50539	105	MXI1	NA	NA	NA	NO	1	NA	NA	NO	no
P50402	53	EMD	NA	NA	0.905753	NO	NA	NA	NA	NO	yes
P49959	667	MRE11A	NA	NA	NA	NO	NA	0.99928	NA	NO	no
P49959	668	MRE11A	NA	NA	NA	NO	NA	0.869176	NA	NO	no
P49848	595	TAF6	NA	NA	NA	NO	0.971424	NA	NA	NO	yes
P49848	586	TAF6	NA	0.982447	NA	NO	0.960248	NA	NA	NO	yes
P49792;Q7Z3J3;A6NKT7;Q99666;O14715;P0DJD0;P0DJD1	1953;978;978;977;977;962;970	RANBP2;RGPD4;RGPD3;RGPD5;RGPD8;RGPD1;RGPD2	NA	NA	NA	NO	0.942792	NA	NA	NO	yes
P49792;Q7Z3J3;A6NKT7;Q99666;O14715	1894;919;919;918;918	RANBP2;RGPD4;RGPD3;RGPD5;RGPD8	NA	NA	NA	NO	0.997838	NA	NA	NO	yes
P49792	1514	RANBP2	NA	NA	NA	NO	NA	0.981502	0.950023	YES	yes
P49792	1399	RANBP2	NA	NA	NA	NO	0.990912	NA	NA	NO	yes
P49792	2480	RANBP2	NA	NA	NA	NO	0.970628	NA	NA	NO	no
P49790	643	NUP153	NA	NA	0.999351	NO	NA	NA	NA	NO	yes
P49790	1177	NUP153	NA	NA	0.997643	NO	NA	NA	NA	NO	yes
P49790	481	NUP153	NA	NA	0.862846	NO	NA	NA	NA	NO	yes
P49790	491	NUP153	NA	NA	0.7679	NO	NA	NA	NA	NO	yes
P49790	1457	NUP153	NA	NA	0.89444	NO	NA	NA	NA	NO	yes
P49790	910	NUP153	NA	NA	NA	NO	NA	0.934767	NA	NO	yes
P49790	1038	NUP153	NA	0.863779	NA	NO	NA	NA	NA	NO	yes
P49790	895	NUP153	NA	0.980671	NA	NO	NA	0.884674	NA	NO	yes
P49790	890	NUP153	NA	0.820946	NA	NO	NA	0.902514	NA	NO	yes
P49790	909	NUP153	0.917947	NA	NA	NO	NA	0.935724	0.861681	YES	yes
P49790	535	NUP153	0.923447	NA	NA	NO	NA	NA	0.94383	NO	yes
P49790	1112	NUP153	0.997451	NA	NA	NO	0.892258	0.98729	0.946099	YES	yes
P49790	920	NUP153	NA	0.9474	NA	NO	0.922742	0.926935	0.945244	YES	yes
P49790	892	NUP153	0.949728	NA	NA	NO	0.886502	NA	NA	NO	yes
P49790	1178	NUP153	NA	NA	NA	NO	0.845283	NA	NA	NO	yes
P49750	484	YLPM1	NA	NA	0.983888	NO	NA	NA	NA	NO	no
P49750	478	YLPM1	0.972405	NA	NA	NO	NA	NA	NA	NO	no
P49750	481	YLPM1	0.794437	NA	NA	NO	0.908016	NA	0.997326	YES	no
P49750	556	YLPM1	NA	NA	NA	NO	0.991686	0.936314	NA	YES	yes
P49448;P00367	117;117	GLUD2;GLUD1	NA	NA	NA	NO	0.994102	NA	NA	NO	no
P49336	410	CDK8	NA	0.939842	NA	NO	NA	NA	0.777538	NO	no
P49116	322	NR2C2	0.874618	NA	NA	NO	NA	NA	NA	NO	no
P48634	1788	PRRC2A	NA	NA	0.860532	NO	NA	NA	NA	NO	no
P48431	249	SOX2	NA	NA	NA	NO	NA	0.847731	NA	NO	no
P48431	246	SOX2	NA	NA	NA	NO	1	1	1	YES	no
P46977	546	STT3A	NA	NA	NA	NO	NA	0.996666	NA	NO	yes
P46937	350	YAP1	0.853397	NA	NA	NO	NA	NA	NA	NO	yes
P46821	1782	MAP1B	NA	0.9996	NA	NO	NA	NA	NA	NO	yes
P46100	591	ATRX	NA	NA	NA	NO	0.935561	0.938402	NA	YES	no
P42166	292	TMPO	NA	NA	NA	NO	0.77314	NA	NA	NO	no
P35968	1231	KDR	1	NA	NA	NO	NA	NA	NA	NO	no
P35968	1235	KDR	1	NA	NA	NO	NA	NA	NA	NO	no
P35658	1985	NUP214	NA	NA	0.871471	NO	NA	NA	NA	NO	yes
P35658	580	NUP214	NA	NA	0.838862	NO	NA	NA	NA	NO	yes
P35658	1198	NUP214	NA	0.999822	NA	NO	NA	0.999689	0.890629	YES	yes
P35658	503	NUP214	NA	0.920965	NA	NO	NA	NA	NA	NO	yes
P35658	1246	NUP214	NA	0.919797	NA	NO	NA	NA	NA	NO	yes
P35658	1304	NUP214	NA	0.800906	NA	NO	NA	NA	NA	NO	no
P35658	598	NUP214	0.861243	NA	NA	NO	NA	NA	NA	NO	yes
P35658	1912	NUP214	0.9918	NA	NA	NO	0.923499	NA	0.92952	YES	yes
P35658	509	NUP214	NA	NA	NA	NO	0.91512	0.876539	0.986782	YES	yes
P35658	575	NUP214	NA	NA	NA	NO	0.990262	0.999547	0.999668	YES	no
P35658	1353	NUP214	0.930154	NA	NA	NO	0.874189	NA	NA	NO	yes
P35658	621	NUP214	NA	NA	0.999177	NO	0.998328	NA	NA	NO	yes
P35658	496	NUP214	NA	NA	NA	NO	0.905764	NA	NA	NO	yes
P35658	1916	NUP214	NA	NA	0.807561	NO	0.751928	NA	NA	NO	yes
P35222	23	CTNNB1	NA	0.999994	NA	NO	0.973264	0.999965	0.997632	YES	yes
P31629	416	HIVEP2	NA	NA	0.998196	NO	NA	NA	NA	NO	yes
P31629	1380	HIVEP2	NA	NA	0.962268	NO	NA	NA	NA	NO	yes
P31629	1320	HIVEP2	NA	NA	0.99706	NO	NA	0.994269	NA	NO	yes
P31629	420	HIVEP2	NA	1	NA	NO	NA	NA	NA	NO	yes
P31629	1278	HIVEP2	NA	0.999715	NA	NO	NA	NA	NA	NO	yes
P31629	163	HIVEP2	NA	0.978475	NA	NO	NA	NA	NA	NO	yes
P31629	1050	HIVEP2	NA	0.958678	NA	NO	NA	NA	NA	NO	no
P31629	924	HIVEP2	0.993797	NA	NA	NO	NA	NA	NA	NO	yes
P30939	238	HTR1F	0.842277	NA	NA	NO	NA	NA	NA	NO	no
P30622	140	CLIP1	NA	0.834499	NA	NO	NA	NA	NA	NO	yes
P27540	629	ARNT	0.931587	NA	NA	NO	NA	NA	0.979406	NO	yes
P23769	182	GATA2	NA	0.974401	NA	NO	NA	NA	NA	NO	no
P23769	196	GATA2	0.864589	NA	NA	NO	NA	NA	NA	NO	no
P22681	601	CBL	NA	0.999999	NA	NO	0.998765	1	0.999756	YES	yes
P20810	404	CAST	1	NA	NA	NO	NA	NA	NA	NO	yes
P18846	184	ATF1	NA	NA	NA	NO	NA	0.856729	NA	NO	yes
P18583	1097	SON	NA	NA	NA	NO	NA	0.992193	NA	NO	yes
P18583	1615	SON	NA	NA	0.97361	NO	NA	0.967956	NA	NO	yes
P18583	1091	SON	NA	NA	NA	NO	NA	0.977325	NA	NO	yes
P18583	244	SON	0.966079	NA	NA	NO	NA	NA	NA	NO	yes
P18583	265	SON	NA	NA	NA	NO	0.772818	NA	NA	NO	yes
P18146	132	EGR1	NA	NA	0.99962	NO	NA	NA	NA	NO	no
P17544	455	ATF7	NA	NA	NA	NO	NA	1	0.999996	YES	yes
P17027	206	ZNF23	NA	NA	NA	NO	NA	1	NA	NO	no
P15923	74	TCF3	NA	NA	NA	NO	0.973338	0.895526	0.990556	YES	no
P15880	285	RPS2	0.99999	NA	NA	NO	0.999958	NA	NA	NO	yes
P15822	588	HIVEP1	NA	NA	0.781674	NO	NA	NA	NA	NO	no
P15822	1416	HIVEP1	NA	NA	NA	NO	NA	1	NA	NO	yes
P15822	667	HIVEP1	NA	NA	NA	NO	NA	0.988213	NA	NO	yes
P15822	1863	HIVEP1	NA	NA	0.920151	NO	NA	0.953493	NA	NO	yes
P15822	1864	HIVEP1	NA	0.913844	NA	NO	NA	NA	NA	NO	yes
P15822	1632	HIVEP1	NA	NA	NA	NO	0.902382	0.798746	NA	YES	yes
P15822	1918	HIVEP1	NA	0.996989	NA	NO	0.926266	0.999895	NA	YES	yes
P15822	331	HIVEP1	NA	0.959694	NA	NO	0.930157	NA	NA	NO	no
P15822	332	HIVEP1	NA	0.755261	NA	NO	0.780869	NA	NA	NO	no
P15336	290	ATF2	NA	0.999991	NA	NO	0.997548	0.861629	0.920938	YES	yes
P14859	442	POU2F1	NA	NA	NA	NO	NA	0.904006	NA	NO	no
P12757	72	SKIL	NA	NA	0.996217	NO	NA	NA	NA	NO	no
P12757	74	SKIL	0.852746	NA	NA	NO	NA	NA	NA	NO	no
P12757	75	SKIL	NA	NA	NA	NO	0.897313	0.862777	0.8549	YES	no
P12645	346	BMP3	NA	NA	0.914816	NO	NA	NA	NA	NO	no
P12270	1676	TPR	NA	0.957388	NA	NO	NA	0.972667	0.789765	YES	yes
P12270	1679	TPR	NA	0.84589	NA	NO	NA	NA	NA	NO	yes
P12270	1660	TPR	0.787273	NA	NA	NO	NA	NA	NA	NO	yes
P10244	607	MYBL2	NA	NA	NA	NO	0.865687	NA	NA	NO	no
P0CJ78	94	ZNF865	NA	0.827438	NA	NO	NA	NA	NA	NO	no
P0C7T5	217	ATXN1L	NA	NA	NA	NO	0.886491	NA	0.865152	YES	yes
P0C7T5	205	ATXN1L	NA	NA	NA	NO	0.843838	NA	NA	NO	no
P09012	148	SNRPA	NA	NA	0.99905	NO	0.999619	NA	NA	NO	yes
P09012	131	SNRPA	NA	NA	NA	NO	0.969368	NA	NA	NO	yes
P08670	7	VIM	NA	NA	0.946277	NO	NA	NA	0.930733	NO	yes
P08670	51	VIM	NA	NA	0.94153	NO	NA	NA	0.817765	NO	yes
P08670	39	VIM	NA	0.92426	NA	NO	NA	0.988433	NA	NO	yes
P05556	214	ITGB1	NA	NA	NA	NO	NA	0.961863	NA	NO	yes
P05388	286	RPLP0	NA	NA	NA	NO	NA	0.776404	NA	NO	no
P04792	187	HSPB1	0.774178	NA	NA	NO	NA	NA	NA	NO	yes
P04075	344	ALDOA	NA	NA	NA	NO	0.8281	NA	0.882226	YES	no
P04066	383	FUCA1	0.873864	NA	NA	NO	NA	NA	NA	NO	yes
P04062	310	GBA	0.772498	NA	NA	NO	NA	NA	NA	NO	yes
P02786	729	TFRC	NA	NA	NA	NO	NA	1	1	YES	yes
P02545	628	LMNA	NA	NA	0.993451	NO	NA	NA	NA	NO	yes
P02545	603	LMNA	NA	NA	0.978852	NO	NA	NA	NA	NO	yes
P02545	619	LMNA	NA	NA	0.883216	NO	NA	NA	NA	NO	yes
P02545	599	LMNA	NA	NA	NA	NO	NA	0.864185	NA	NO	yes
P00519	855	ABL1	NA	NA	NA	NO	NA	0.872015	NA	NO	yes
O95881	136	TXNDC12	NA	NA	1	NO	NA	1	NA	NO	yes
O95865	167	DDAH2	0.851891	NA	NA	NO	NA	NA	NA	NO	yes
O95835	490	LATS1	NA	NA	NA	NO	NA	0.969208	NA	NO	no
O95835	484	LATS1	NA	NA	NA	NO	0.819665	NA	NA	NO	no
O95789	612	ZMYM6	NA	NA	NA	NO	0.939902	NA	0.996386	YES	yes
O95789	382	ZMYM6	NA	NA	NA	NO	0.811151	NA	NA	NO	no
O95487	347	SEC24B	NA	NA	NA	NO	0.886789	NA	NA	NO	yes
O95180	2023	CACNA1H	NA	NA	NA	NO	NA	0.901824	NA	NO	no
O95081	191	AGFG2	NA	NA	0.99395	NO	NA	NA	NA	NO	yes
O95081	177	AGFG2	NA	NA	0.985832	NO	NA	NA	NA	NO	yes
O95081	185	AGFG2	NA	NA	0.974564	NO	NA	NA	NA	NO	yes
O94913	184	PCF11	NA	NA	NA	NO	NA	0.780556	NA	NO	no
O94842	405	TOX4	NA	NA	NA	NO	0.855399	0.991467	NA	YES	yes
O75629	162	CREG1	NA	NA	NA	NO	NA	1	1	YES	yes
O75376	1042	NCOR1	NA	NA	0.800458	NO	NA	NA	NA	NO	yes
O75376	1484	NCOR1	NA	NA	NA	NO	NA	0.937378	NA	NO	yes
O75376	2079	NCOR1	NA	NA	NA	NO	NA	0.884088	NA	NO	yes
O75376	1487	NCOR1	NA	0.809686	NA	NO	NA	NA	NA	NO	yes
O75376	1877	NCOR1	0.989166	NA	NA	NO	NA	NA	NA	NO	no
O75376	1043	NCOR1	NA	0.900218	NA	NO	0.900185	0.941719	NA	YES	no
O75376	1812	NCOR1	NA	NA	NA	NO	0.999997	NA	NA	NO	yes
O75376	54	NCOR1	NA	NA	NA	NO	0.998041	NA	NA	NO	yes
O75376	1861	NCOR1	NA	NA	NA	NO	0.909686	NA	NA	NO	yes
O75179	1839	ANKRD17	NA	NA	0.858246	NO	NA	NA	NA	NO	yes
O75179	1844	ANKRD17	NA	NA	0.7934	NO	NA	NA	NA	NO	no
O75179	1838	ANKRD17	NA	NA	NA	NO	NA	0.776052	NA	NO	no
O75179	1825	ANKRD17	NA	0.885137	NA	NO	NA	0.938113	0.861665	YES	yes
O75179	2382	ANKRD17	NA	0.894323	NA	NO	NA	NA	NA	NO	yes
O75179	1826	ANKRD17	NA	0.989134	NA	NO	0.97457	0.995284	NA	YES	yes
O75179	2005	ANKRD17	NA	NA	NA	NO	0.98014	0.832734	NA	YES	no
O75179	2006	ANKRD17	NA	NA	NA	NO	0.98014	0.832734	NA	YES	no
O75179	2041	ANKRD17	NA	NA	NA	NO	0.947313	NA	0.854479	YES	yes
O75179	1820	ANKRD17	0.93949	NA	NA	NO	0.809658	NA	NA	NO	yes
O75179	1821	ANKRD17	0.93949	NA	NA	NO	0.820917	NA	NA	NO	yes
O75179	1537	ANKRD17	NA	NA	NA	NO	0.867131	NA	NA	NO	yes
O75170	899	PPP6R2	NA	NA	NA	NO	NA	0.999973	NA	NO	no
O75170	907	PPP6R2	NA	NA	NA	NO	0.998828	NA	0.999626	YES	no
O75113	416	N4BP1	NA	NA	NA	NO	0.993675	NA	NA	NO	yes
O60907	169	TBL1X	0.998098	NA	NA	NO	NA	NA	NA	NO	yes
O60675	156	MAFK	NA	0.94955	NA	NO	NA	NA	0.999979	NO	yes
O60675	134	MAFK	NA	NA	NA	NO	0.867734	0.953977	0.887039	YES	yes
O60318	117	MCM3AP	NA	NA	NA	NO	NA	0.889658	NA	NO	yes
O60237	543	PPP1R12B	NA	NA	NA	NO	0.999676	NA	NA	NO	yes
O43913	286	ORC5	NA	NA	NA	NO	NA	0.999709	NA	NO	no
O43670	267	ZNF207	0.930607	NA	NA	NO	NA	NA	NA	NO	yes
O43670	321	ZNF207	0.975779	NA	NA	NO	NA	NA	NA	NO	yes
O43660	121	PLRG1	NA	NA	NA	NO	0.872008	NA	NA	NO	no
O43597	101	SPRY2	NA	NA	NA	NO	NA	0.905363	NA	NO	no
O43548	498	TGM5	NA	NA	0.9286	NO	NA	NA	NA	NO	no
O43548	493	TGM5	NA	NA	0.865278	NO	NA	NA	NA	NO	no
O43491	899	EPB41L2	0.871156	NA	NA	NO	NA	NA	0.989974	NO	yes
O43432	277	EIF4G3	0.837671	NA	NA	NO	NA	NA	NA	NO	yes
O43432	278	EIF4G3	0.837671	NA	NA	NO	NA	NA	NA	NO	yes
O43432	258	EIF4G3	NA	NA	NA	NO	0.776924	0.894675	NA	YES	yes
O43426	1383	SYNJ1	NA	NA	NA	NO	NA	0.986441	NA	NO	yes
O43399	121	TPD52L2	NA	NA	NA	NO	0.987801	NA	NA	NO	yes
O15525	148	MAFG	NA	NA	NA	NO	NA	0.987737	NA	NO	no
O15516	711	CLOCK	0.999999	NA	NA	NO	NA	NA	NA	NO	yes
O15460	261	P4HA2	NA	NA	0.900496	NO	NA	NA	0.854535	NO	yes
O15234	699	CASC3	NA	NA	NA	NO	0.999997	NA	0.999999	YES	yes
O15047	275	SETD1A	NA	NA	NA	NO	0.842695	NA	NA	NO	yes
O15047	256	SETD1A	NA	NA	NA	NO	0.797782	NA	NA	NO	no
O15027	1981	SEC16A	NA	NA	0.98597	NO	NA	NA	NA	NO	yes
O15014	1195	ZNF609	NA	NA	NA	NO	0.885896	NA	NA	NO	yes
O15014	952	ZNF609	NA	NA	NA	NO	0.887346	NA	NA	NO	no
O14974	565	PPP1R12A	NA	NA	0.804811	NO	NA	NA	NA	NO	yes
O14974	396	PPP1R12A	NA	NA	NA	NO	NA	0.792613	NA	NO	yes
O14974	381	PPP1R12A	NA	0.905671	NA	NO	NA	NA	NA	NO	yes
O14974	566	PPP1R12A	NA	0.909769	NA	NO	NA	0.914584	NA	NO	yes
O14974	594	PPP1R12A	0.908093	NA	NA	NO	NA	NA	NA	NO	yes
O14907	61	TAX1BP3	NA	NA	NA	NO	NA	1	1	YES	yes
O14827	761	RASGRF2	NA	NA	NA	NO	NA	0.823312	NA	NO	no
O14686	4772	KMT2D	NA	NA	NA	NO	0.992907	NA	0.936045	YES	no
O14639	452	ABLIM1	NA	NA	0.953439	NO	NA	NA	NA	NO	yes
O14639	462	ABLIM1	0.999751	NA	NA	NO	NA	NA	NA	NO	yes
O14497	238	ARID1A	0.967297	NA	NA	NO	NA	NA	NA	NO	yes
O14497	241	ARID1A	0.958602	NA	NA	NO	NA	NA	NA	NO	no
O00571	114	DDX3X	NA	NA	NA	NO	NA	1	NA	NO	no
O00555	887	CACNA1A	0.999477	NA	NA	NO	NA	NA	NA	NO	no
O00268	558	TAF4	NA	NA	0.936654	NO	NA	NA	NA	NO	no
O00268	714	TAF4	0.79059	NA	NA	NO	NA	0.80089	NA	NO	yes
O00151	123	PDLIM1	NA	NA	0.87834	NO	NA	NA	NA	NO	yes
H0YHG0;P82979	499;186	SARNP	NA	0.981906	NA	NO	0.902389	0.992768	NA	YES	yes
H0YAE9;O00584	84;103	RNASET2	NA	NA	NA	NO	1	1	NA	YES	yes
A8CG34;Q96HA1;A6NF01	715;738;322	POM121C;POM121;POM121B	NA	NA	0.999997	NO	NA	NA	NA	NO	yes
A8CG34;Q96HA1	674;697	POM121C;POM121	NA	NA	NA	NO	NA	0.980292	NA	NO	yes
A8CG34;Q96HA1	658;681	POM121C;POM121	NA	0.999978	NA	NO	NA	0.99992	NA	NO	yes
A8CG34;Q96HA1	663;686	POM121C;POM121	0.885104	NA	NA	NO	NA	NA	NA	NO	yes
A8CG34;A6NF01;Q96HA1	715;322;738	POM121C;POM121B;POM121	NA	0.999999	NA	NO	NA	NA	NA	NO	yes
A8CG34	977	POM121C	NA	0.963283	NA	NO	NA	NA	NA	NO	yes
A6NF01;Q96HA1;A8CG34	322;738;715	POM121B;POM121;POM121C	NA	NA	NA	NO	0.999992	NA	0.988823	YES	no
A6NF01;A8CG34;Q96HA1	322;715;738	POM121B;POM121C;POM121	NA	NA	NA	NO	NA	0.999042	NA	NO	no
A6NF01	272	POM121B	NA	NA	NA	NO	NA	0.920437	NA	NO	no
A6NF01	278	POM121B	NA	NA	NA	NO	NA	0.919304	NA	NO	no
A6NF01	277	POM121B	NA	NA	NA	NO	0.938698	0.992182	0.913034	YES	no
A6NF01	281	POM121B	NA	NA	NA	NO	0.995729	NA	NA	NO	no
A5YKK6	1037	CNOT1	NA	NA	0.83378	NO	NA	NA	NA	NO	no
A5YKK6	1047	CNOT1	NA	NA	0.792468	NO	NA	NA	NA	NO	no
A5YKK6	1043	CNOT1	NA	NA	NA	NO	NA	0.978096	0.788053	YES	yes
A3KN83	112	SBNO1	NA	NA	NA	NO	NA	0.883208	NA	NO	yes
A0AVK6	681	E2F8	NA	NA	0.999662	NO	0.998778	0.9995	NA	YES	no
A0AVK6	682	E2F8	NA	NA	0.984317	NO	0.904174	0.884329	NA	YES	no
A0AV96	519	RBM47	NA	NA	0.996575	NO	NA	NA	NA	NO	no
A0AV96	523	RBM47	NA	NA	NA	NO	0.940668	NA	0.999681	YES	yes
A0A0C4DFX4;Q6ZRS2	2229;2406	SRCAP	NA	NA	NA	NO	0.999722	NA	0.981895	YES	no

## Sheet: Detailed information of MS data
Detailed information of MS data in Table S7
Replicate 1 (Light)
Proteins	Positions within proteins	Protein	Protein names	Gene names	Localization prob	Score diff	PEP	Score	Delta score	Score for localization	Number of GalT_UC1	Amino acid	Sequence window	Modification window	Peptide window coverage	GalT_UC1 Probabilities	GalT_UC1 Score diffs	Position in peptide	Charge	Mass error [ppm]	Intensity	Intensity___1	Intensity___2	Intensity___3	Ratio mod/base	id	Protein group IDs	Positions	Position	Peptide IDs	Mod. peptide IDs	Evidence IDs	MS/MS IDs	Best localization evidence ID	Best localization MS/MS ID	Best localization scan number	Best score evidence ID	Best score MS/MS ID	Best score scan number	Best PEP evidence ID	Best PEP MS/MS ID	Best PEP scan number
A0A0B4J203;Q6UN15	205;205	A0A0B4J203	Pre-mRNA 3'-end-processing factor FIP1	FIP1L1	0.990912	20.4816	4.73222e-23	106.29	84.938	106.29	1	T	EKQKRIRMGLEVIPVTSTTNKITAEDCTMEV	X;X;X;X;X;X;X;X;X;X;X;X;X;X;X;GalT_UC1;X;X;X;X;X;X;X;X;X;X;X;X;X;X;X	XXXXXXXPPPPPPPPPPPPPPXXXXXXXXXX	MGLEVIPVT(0.991)S(0.009)TTNK	MGLEVIPVT(20.48)S(-20.48)T(-39.08)T(-40.1)NK	9	3	-0.66205	14614000	14614000	0	0	NaN	565	1	205	205	313	385	604	1356	604	1356	40946	604	1356	40946	604	1356	40946
A0A0G2JR68;Q9HAP2	73;602	A0A0G2JR68	MLX-interacting protein	MLXIP	0.996316	24.3208	0	260.49	242.79	260.49	1	S	VIMTSGPLKREGMLASTVSQSNVVIAPAAIA	X;X;X;X;X;X;X;X;X;X;X;X;X;X;X;GalT_UC1;X;X;X;X;X;X;X;X;X;X;X;X;X;X;X	XXXXXXXXXXPPPPPPPPPPPPPPPPPPPPP	EGMLAS(0.996)T(0.004)VSQSNVVIAPAAIAR	EGMLAS(24.32)T(-24.32)VS(-81.35)QS(-122.88)NVVIAPAAIAR	6	3	-0.26662	15418000	15418000	0	0	NaN	0	3	73	73	102	129	208	512;513	208	513	56652	208	513	56652	208	513	56652
A3KN83	126	A3KN83	Protein strawberry notch homolog 1	SBNO1	0.999455	32.6322	2.14245e-231	208.51	186.85	208.51	1;2	T	VTTNRQTITLTKFIQTTASTRPSVSAPTVRN	X;X;X;X;X;X;X;X;X;X;X;X;X;X;X;GalT_UC1;X;X;GalT_UC1;X;X;X;X;X;X;X;X;X;X;X;X	XXXXXXXXXXXXPPPPPPPPPPPPPPPPPPX	FIQT(0.999)T(0.001)ASTRPSVSAPTVR	FIQT(32.63)T(-32.63)AS(-81.95)T(-89.2)RPS(-147.59)VS(-155.12)APT(-172.68)VR	4	4	-0.16214	110070000	79912000	30153000	0	NaN	568	6	126	126	132	164;165	263;264;265;266	656;657;658;659;660;661;662;663	266	661	21861	266	661	21861	266	661	21861
A5YKK6	1038	A5YKK6	CCR4-NOT transcription complex subunit 1	CNOT1	0.869341	8.73194	7.88929e-50	122.75	105.04	122.75	2	T	QAQVPAKAPLAGQVSTMVTTSTTTTVAKTVT	X;X;X;X;X;X;X;X;X;X;X;X;X;X;X;GalT_UC1;X;X;X;GalT_UC1;GalT_UC1;X;X;X;X;X;X;X;GalT_UC1;X;X	XXXXXXXPPPPPPPPPPPPPPPPPPPPPXXX	APLAGQVS(0.118)T(0.869)MVT(0.128)T(0.856)S(0.024)T(0.002)T(0.002)TTVAK	APLAGQVS(-8.73)T(8.73)MVT(-8.73)T(8.73)S(-15.37)T(-26.01)T(-26.01)T(-36.28)T(-46.16)VAK	9	4	-0.033565	59331000	0	59331000	0	NaN	570	7	1038	1038	25	27	40;41	106;107	41	107	27022	41	107	27022	41	107	27022
A5YKK6	1041	A5YKK6	CCR4-NOT transcription complex subunit 1	CNOT1	0.998783	29.6343	2.28103e-214	201.72	185.75	201.72	2	T	VPAKAPLAGQVSTMVTTSTTTTVAKTVTVTR	X;X;X;X;X;X;X;X;X;X;X;X;X;X;X;GalT_UC1;GalT_UC1;X;X;X;X;X;X;X;X;GalT_UC1;X;X;X;X;X	XXXXPPPPPPPPPPPPPPPPPPPPPXXXXXX	APLAGQVST(0.001)MVT(0.999)T(0.999)S(0.001)TTTTVAK	APLAGQVS(-39.08)T(-29.63)MVT(29.63)T(29.63)S(-29.63)T(-39.08)T(-48.31)T(-66.11)T(-74.68)VAK	12	4	-0.023552	84829000	0	84829000	0	NaN	571	7	1041	1041	25	27	42	108;109	42	108	27305	42	108	27305	42	108	27305
A5YKK6	1042	A5YKK6	CCR4-NOT transcription complex subunit 1	CNOT1	0.998766	29.6343	2.28103e-214	201.72	185.75	201.72	2	T	PAKAPLAGQVSTMVTTSTTTTVAKTVTVTRP	X;X;X;X;X;X;X;X;X;X;X;GalT_UC1;X;X;GalT_UC1;GalT_UC1;X;X;X;X;X;X;X;X;GalT_UC1;X;X;X;X;X;X	XXXPPPPPPPPPPPPPPPPPPPPPXXXXXXX	APLAGQVST(0.001)MVT(0.999)T(0.999)S(0.001)TTTTVAK	APLAGQVS(-39.08)T(-29.63)MVT(29.63)T(29.63)S(-29.63)T(-39.08)T(-48.31)T(-66.11)T(-74.68)VAK	13	4	-0.023552	134140000	0	134140000	0	NaN	572	7	1042	1042	25	27	41;42	107;108;109	42	108	27305	42	108	27305	42	108	27305
A5YKK6	1051	A5YKK6	CCR4-NOT transcription complex subunit 1	CNOT1	1	63.147	2.01146e-216	208.6	167.51	208.6	1	T	VSTMVTTSTTTTVAKTVTVTRPTGVSFKKDV	X;X;GalT_UC1;X;X;GalT_UC1;GalT_UC1;GalT_UC1;X;X;X;X;X;X;X;GalT_UC1;X;X;X;X;X;X;X;X;X;X;X;X;X;X;X	XXXXXXXXXXXXXXXPPPPPPPPPPPPPXXX	T(1)VTVTRPTGVSFK	T(63.15)VT(-63.15)VT(-126.98)RPT(-159.18)GVS(-175.98)FK	1	4	-0.38076	149790000	149790000	0	0	18.079	575	7	1051	1051	644	802	1261;1262	2973;2974;2975;2976;2977	1261	2974	16116	1261	2974	16116	1261	2974	16116
A8CG34	984	A8CG34	Nuclear envelope pore membrane protein POM 121C	POM121C	0.923262	10.8063	0	235.76	225.46	235.76	1	T	GSSFTFGNSAAPAPATAPTPAPASTIKIVPA	X;X;X;X;X;X;X;X;X;X;X;X;X;X;X;GalT_UC1;X;X;X;X;X;X;X;X;X;X;X;X;X;X;X	PPPPPPPPPPPPPPPPPPPPPPPPPPPXXXX	PALTPSFGSSFTFGNS(0.077)AAPAPAT(0.923)APTPAPASTIK	PALT(-150.81)PS(-134.83)FGS(-91)S(-81.62)FT(-62.28)FGNS(-10.81)AAPAPAT(10.81)APT(-42.22)PAPAS(-69.7)T(-80.26)IK	23	4	0.13887	159020000	159020000	0	0	NaN	581	11	984	984	351	429	672	1496;1497;1498;1499	672	1499	75343	672	1499	75343	672	1499	75343
A8CG34;Q96HA1	663;686	A8CG34	Nuclear envelope pore membrane protein POM 121C;Nuclear envelope pore membrane protein POM 121	POM121C;POM121	0.885104	10.4868	8.4026e-13	61.345	56.137	61.345	2	T	VPATDTKAPPTLQAETATKPQATSAPSPAPK	X;X;X;X;X;X;X;X;X;X;GalT_UC1;X;X;X;X;GalT_UC1;X;X;X;X;X;X;X;X;X;X;X;X;X;X;X	XXXXXXXPPPPPPPPPPPPPPPPPPPPPPPP	APPT(0.581)LQAET(0.885)AT(0.425)KPQAT(0.054)S(0.037)APS(0.018)PAPK	APPT(1.81)LQAET(10.49)AT(-1.81)KPQAT(-13.41)S(-13.41)APS(-18)PAPK	9	3	0.28638	32838000	0	32838000	0	0.57949	579	11	663	663	26	28;29	45	120;121;122	45	120	14248	45	120	14248	45	120	14248
A8CG34;Q96HA1	670;693	A8CG34	Nuclear envelope pore membrane protein POM 121C;Nuclear envelope pore membrane protein POM 121	POM121C;POM121	0.999978	46.7006	0	239.58	217.11	144.5	1;2	T	APPTLQAETATKPQATSAPSPAPKQSFLFGT	X;X;X;X;X;X;X;X;X;X;X;X;X;X;X;GalT_UC1;GalT_UC1;X;X;X;X;X;X;X;X;X;X;X;X;X;X	PPPPPPPPPPPPPPPPPPPPPPPPXXXXXXX	APPTLQAETATKPQAT(1)S(0.998)APS(0.002)PAPK	APPT(-97.67)LQAET(-88.44)AT(-66.41)KPQAT(46.7)S(26.37)APS(-26.37)PAPK	16	5	-0.041916	1851200000	1201900000	649290000	0	32.668	580	11	670	670	26	28;29	43;44;46;47	110;111;112;113;114;115;116;117;118;119;123;124;125;126;127;128;129;130;131;132;133;134;135;136	43	111	14185	46	126	19148	46	126	19148
A8CG34;Q96HA1	671;694	A8CG34	Nuclear envelope pore membrane protein POM 121C;Nuclear envelope pore membrane protein POM 121	POM121C;POM121	0.999431	32.4946	3.41284e-100	144.5	128.65	140.1	2	S	PPTLQAETATKPQATSAPSPAPKQSFLFGTQ	X;X;X;X;X;X;X;X;X;X;X;X;X;X;GalT_UC1;GalT_UC1;X;X;X;X;X;X;X;X;X;X;X;X;X;X;X	PPPPPPPPPPPPPPPPPPPPPPPXXXXXXXX	APPTLQAETATKPQAT(1)S(0.999)APS(0.001)PAPK	APPT(-100.09)LQAET(-62.02)AT(-42.69)KPQAT(42.69)S(32.49)APS(-32.49)PAPK	17	4	0.49348	649290000	0	649290000	0	11.458	7	11	671	671	26	28;29	43;44	110;111;112;113;114;115;116;117;118;119	44	116	14190	43	111	14185	43	111	14185
H7C469;P07339	65;265	H7C469	Cathepsin D;Cathepsin D light chain;Cathepsin D heavy chain	CTSD	0.988074	19.703	0.000222754	70.056	28.657	70.056	1	T	TDSKYYKGSLSYLNVTRKAYWQVHLDQVEVA	X;X;X;X;X;X;X;X;X;X;X;X;X;X;X;GalT_UC1;X;X;X;X;X;X;X;X;X;X;X;X;X;X;X	XXXXXXXPPPPPPPPPPXXXXXXXXXXXXXX	GS(0.001)LS(0.011)YLNVT(0.988)R	GS(-28.66)LS(-19.7)YLNVT(19.7)R	9	3	0.017231	14868000	14868000	0	0	NaN	589	18	65	65	172	211	329	783;784	329	783	24080	329	783	24080	329	783	24080
M0QZ24;O00754	119;932	M0QZ24	Lysosomal alpha-mannosidase;Lysosomal alpha-mannosidase A peptide;Lysosomal alpha-mannosidase B peptide;Lysosomal alpha-mannosidase C peptide;Lysosomal alpha-mannosidase D peptide;Lysosomal alpha-mannosidase E peptide	MAN2B1	0.99551	23.4581	1.33568e-05	83	44.586	83	1	S	LEHQFAVGEDSGRNLSAPVTLNLRDLFSTFT	X;X;X;X;X;X;X;X;X;X;X;X;X;X;X;GalT_UC1;X;X;X;X;X;X;X;X;X;X;X;X;X;X;X	XXXXXXXXXXXXXPPPPPPPPPPPXXXXXXX	NLS(0.996)APVT(0.004)LNLR	NLS(23.46)APVT(-23.46)LNLR	3	3	-0.0591	9251500	9251500	0	0	NaN	19	19	119	119	333	408	635	1418;1419	635	1418	39199	635	1418	39199	635	1418	39199
O00268	528	O00268	Transcription initiation factor TFIID subunit 4	TAF4	1	131.839	0	256.31	233.09	256.31	1	S	IIARQVTPTTIIKQVSQAQTTVQPSATLQRS	X;X;X;X;X;X;X;X;X;X;X;X;X;X;X;GalT_UC1;X;X;X;X;X;X;X;X;X;X;X;X;X;X;X	XXXXXXXXXXXXXPPPPPPPPPPPPPPPPPX	QVS(1)QAQTTVQPSATLQR	QVS(131.84)QAQT(-131.84)T(-150.02)VQPS(-197.49)AT(-232.95)LQR	3	3	0.18677	231460000	231460000	0	0	35.956	20	20	528	528	428	519	792	1785;1786;1787;1788	792	1786	15133	792	1786	15133	792	1786	15133
O00268	714	O00268	Transcription initiation factor TFIID subunit 4	TAF4	0.79059	9.05792	2.54354e-31	107.33	95.853	107.33	1	T	SSSVQRTAGKTAATVTSALQPPVLSLTQPTQ	X;X;X;X;X;X;X;X;X;X;X;X;X;X;X;GalT_UC1;X;X;X;X;X;X;X;X;X;X;X;X;X;X;X	XXXXXXXXXXPPPPPPPPPPPPPPPPPPPPP	T(0.013)AAT(0.098)VT(0.791)S(0.098)ALQPPVLSLTQPTQVGVGK	T(-17.84)AAT(-9.06)VT(9.06)S(-9.06)ALQPPVLS(-82.4)LT(-89.23)QPT(-98.82)QVGVGK	6	3	-0.0011407	20559000	20559000	0	0	NaN	590	20	714	714	542	674	1075	2487;2488	1075	2488	72036	1075	2488	72036	1075	2488	72036
O00555	887	O00555	Voltage-dependent P/Q-type calcium channel subunit alpha-1A	CACNA1A	0.999477	32.8137	0.0328679	40.725	13.043	40.725	1	S	PSGSAGLDARRPWAGSQEAELSREGPYGRES	X;X;X;X;X;X;X;X;X;X;X;X;X;X;X;GalT_UC1;X;X;X;X;X;X;X;X;X;X;X;X;X;X;X	XXXXXXXXXXPPPPPPPPPPPPPXXXXXXXX	RPWAGS(0.999)QEAELS(0.001)R	RPWAGS(32.81)QEAELS(-32.81)R	6	3	-0.79009	11615000	11615000	0	0	NaN	22	23	887	887	434	529	806	1817	806	1817	24745	806	1817	24745	806	1817	24745
O14497	238	O14497	AT-rich interactive domain-containing protein 1A	ARID1A	0.967297	14.6091	2.53481e-36	74.446	68.351	74.446		T	PPPAPAYALSSPRGGTPGSGAAAAAGSKPPP	X;X;X;X;X;X;X;X;X;X;X;X;X;X;X;GalT_UC1;X;X;GalT_UC1;X;X;X;X;X;X;X;X;X;X;X;X	XXXXXXXXXXXXXPPPPPPPPPPPPPPPPPP	GGT(0.967)PGS(0.959)GAAAAAGS(0.073)KPPPS(0.001)SSASASSSSSSFAQQR	GGT(14.61)PGS(13.57)GAAAAAGS(-13.57)KPPPS(-36.59)S(-38.97)S(-44.43)AS(-54.38)AS(-62.57)S(-62.57)S(-66.13)S(-69.13)S(-71.51)S(-73.18)FAQQR	3	5	0.62872	25785000	0	25785000	0	4.1306	592	24	238	238	157	193;195	308	750	308	750	9645	308	750	9645	308	750	9645
O14497	241	O14497	AT-rich interactive domain-containing protein 1A	ARID1A	0.958602	13.57	2.53481e-36	74.446	68.351	74.446		S	APAYALSSPRGGTPGSGAAAAAGSKPPPSSS	X;X;X;X;X;X;X;X;X;X;X;X;GalT_UC1;X;X;GalT_UC1;X;X;X;X;X;X;X;X;X;X;X;X;X;X;X	XXXXXXXXXXPPPPPPPPPPPPPPPPPPPPP	GGT(0.967)PGS(0.959)GAAAAAGS(0.073)KPPPS(0.001)SSASASSSSSSFAQQR	GGT(14.61)PGS(13.57)GAAAAAGS(-13.57)KPPPS(-36.59)S(-38.97)S(-44.43)AS(-54.38)AS(-62.57)S(-62.57)S(-66.13)S(-69.13)S(-71.51)S(-73.18)FAQQR	6	5	0.62872	25785000	0	25785000	0	4.1306	23	24	241	241	157	193;195	308	750	308	750	9645	308	750	9645	308	750	9645
O14497	255	O14497	AT-rich interactive domain-containing protein 1A	ARID1A	0.950473	13.0499	0	371.9	337.52	371.9	1	S	GSGAAAAAGSKPPPSSSASASSSSSSFAQQR	X;X;X;X;X;X;X;X;X;X;X;X;X;X;X;GalT_UC1;X;X;X;X;X;X;X;X;X;X;X;X;X;X;X	PPPPPPPPPPPPPPPPPPPPPPPPPPPPPPP	GGTPGSGAAAAAGSKPPPS(0.047)S(0.95)S(0.002)ASASSSSSSFAQQR	GGT(-142.71)PGS(-152.68)GAAAAAGS(-51.18)KPPPS(-13.05)S(13.05)S(-25.93)AS(-63.54)AS(-75.74)S(-87.75)S(-111.26)S(-122.74)S(-145.16)S(-166.84)FAQQR	20	4	0.38031	407890000	407890000	0	0	65.341	24	24	255	255	157	193;195	305;306	738;739;740;741;742;743;744;745;746;747	305	741	12952	305	741	12952	305	741	12952
O14639	462	O14639	Actin-binding LIM protein 1	ABLIM1	0.999751	36.1985	4.71255e-50	134.25	91.22	134.25	1	S	IHRSTSQGSINSPVYSRHSYTPTTSRSPQHF	X;X;X;X;X;X;X;X;X;X;X;X;X;X;X;GalT_UC1;X;X;X;X;X;X;X;X;X;X;X;X;X;X;X	XXXPPPPPPPPPPPPPPXXXXXXXXXXXXXX	STSQGSINSPVYS(1)R	S(-68.22)T(-59.85)S(-51.11)QGS(-64.16)INS(-36.2)PVYS(36.2)R	13	3	0.090176	29923000	29923000	0	0	NaN	25	25	462	462	530	654	1006	2301;2302	1006	2302	10646	1006	2302	10646	1006	2302	10646
O14964	299	O14964	Hepatocyte growth factor-regulated tyrosine kinase substrate	HGS	0.789779	6.23471	0	225.17	216.56	225.17	1	S	STYTSYPKAEPMPSASSAPPASSLYSSPVNS	X;X;X;X;X;X;X;X;X;X;X;X;X;X;X;GalT_UC1;X;X;X;X;X;X;X;X;X;X;X;X;X;X;X	XXXXXXXXPPPPPPPPPPPPPPPPPPPPPPP	AEPMPS(0.002)AS(0.79)S(0.188)APPAS(0.003)S(0.003)LYS(0.013)SPVNSSAPLAEDIDPELAR	AEPMPS(-25.34)AS(6.23)S(-6.23)APPAS(-24.01)S(-24.01)LYS(-17.69)S(-34.84)PVNS(-75.23)S(-90.35)APLAEDIDPELAR	8	4	0.66549	229110000	229110000	0	0	NaN	29	27	299	299	8	10	15	40;41	15	41	80187	15	41	80187	15	41	80187
O14974	570	O14974	Protein phosphatase 1 regulatory subunit 12A	PPP1R12A	0.946264	12.5061	0	221.91	210.02	221.91	2;3	T	FGRRQDDLISSSVPSTTSTPTVTSAAGLQKS	X;X;X;X;X;X;X;X;X;X;X;X;X;X;GalT_UC1;GalT_UC1;GalT_UC1;X;X;X;GalT_UC1;X;GalT_UC1;GalT_UC1;X;X;X;X;X;X;X	XXXPPPPPPPPPPPPPPPPPPPPPPPPPPPX	RQDDLISSSVPS(0.053)T(0.946)T(0.943)S(0.053)T(0.003)PTVTSAAGLQK	RQDDLIS(-60.07)S(-48.56)S(-36.79)VPS(-12.51)T(12.51)T(12.51)S(-12.51)T(-24.77)PT(-48.56)VT(-86.45)S(-113.58)AAGLQK	13	4	0.057692	936570000	0	833540000	103030000	NaN	595	28	570	570	401;435	488;489;530;531;532	752;807;808;810;811;812	1700;1701;1818;1819;1821;1822;1823;1824;1825;1826;1827;1828;1829;1830;1831;1832;1833;1834;1835	812	1831	37314	812	1831	37314	812	1831	37314
O14974	571	O14974	Protein phosphatase 1 regulatory subunit 12A	PPP1R12A	0.948674	17.0626	0	221.91	210.02	136.68	1;2;3	T	GRRQDDLISSSVPSTTSTPTVTSAAGLQKSL	X;X;X;X;X;X;X;X;X;X;X;X;X;X;GalT_UC1;GalT_UC1;X;X;X;GalT_UC1;X;X;GalT_UC1;X;X;X;X;X;X;X;X	XXPPPPPPPPPPPPPPPPPPPPPPPPPPPXX	RQDDLIS(0.003)S(0.011)S(0.014)VPS(0.133)T(0.865)T(0.949)S(0.022)T(0.004)PTVTSAAGLQK	RQDDLIS(-27.46)S(-19.66)S(-19.66)VPS(-8.63)T(8.63)T(17.06)S(-17.06)T(-25.28)PT(-47.2)VT(-55.34)S(-70.73)AAGLQK	14	3	-0.090073	1003400000	66873000	833540000	103030000	NaN	596	28	571	571	401;435	488;489;530;531;532	752;807;808;810;811;812;816	1700;1701;1818;1819;1821;1822;1823;1824;1825;1826;1827;1828;1829;1830;1831;1832;1833;1834;1835;1840;1841;1842;1843;1844;1845	811	1828	37258	812	1831	37314	812	1831	37314
O14974	577	O14974	Protein phosphatase 1 regulatory subunit 12A	PPP1R12A	0.983561	19.1228	8.69751e-55	125.5	104.84	125.5	1;2	T	LISSSVPSTTSTPTVTSAAGLQKSLLSSTST	X;X;X;X;X;X;X;X;GalT_UC1;X;X;X;X;X;X;GalT_UC1;GalT_UC1;X;X;X;X;X;X;X;X;X;X;X;X;X;X	PPPPPPPPPPPPPPPPPPPPPPPXXXXXXXX	RQDDLISSSVPSTTST(0.002)PT(0.002)VT(0.984)S(0.012)AAGLQK	RQDDLIS(-77.94)S(-71.13)S(-63.02)VPS(-54.54)T(-45.69)T(-36.51)S(-36.51)T(-26.99)PT(-26.99)VT(19.12)S(-19.12)AAGLQK	20	3	0.18123	111280000	55569000	55710000	0	NaN	598	28	577	577	401;435	488;489;530;531;532	814;817	1837;1846;1847;1848;1849	817	1847	45774	817	1847	45774	817	1847	45774
O14974	578	O14974	Protein phosphatase 1 regulatory subunit 12A	PPP1R12A	0.93334	14.9832	7.72453e-32	108.34	94.433	54.368	2;3	S	ISSSVPSTTSTPTVTSAAGLQKSLLSSTSTT	X;X;X;X;X;X;X;GalT_UC1;GalT_UC1;X;X;X;X;X;GalT_UC1;GalT_UC1;X;X;X;X;X;X;X;X;X;X;X;X;X;X;GalT_UC1	PPPPPPPPPPPPPPPPPPPPPPXXXXXXXXX	RQDDLIS(0.001)S(0.002)S(0.008)VPS(0.13)T(0.55)T(0.55)S(0.55)T(0.144)PT(0.066)VT(0.066)S(0.933)AAGLQK	RQDDLIS(-33.92)S(-28.13)S(-21.8)VPS(-7.71)T(0)T(0)S(0)T(-7.71)PT(-14.98)VT(-14.98)S(14.98)AAGLQK	21	4	-0.14388	36681000	0	14695000	21986000	NaN	35	28	578	578	401;435	488;489;530;531;532	807;813	1818;1836	807	1818	30696	808	1819	32090	808	1819	32090
O14974	594	O14974	Protein phosphatase 1 regulatory subunit 12A	PPP1R12A	0.908093	10.0211	0.000109046	74.841	53.082	74.841	1	T	AAGLQKSLLSSTSTTTKITTGSSSAGTQSST	X;X;X;X;X;X;X;X;X;X;X;X;X;X;X;GalT_UC1;X;X;X;X;X;X;X;X;X;X;X;X;X;X;X	XXXXXXPPPPPPPPPPPXXXXXXXXXXXXXX	SLLSSTST(0.001)T(0.09)T(0.908)K	S(-61.44)LLS(-63.58)S(-58.07)T(-44.64)S(-36.21)T(-28.49)T(-10.02)T(10.02)K	10	3	0.21873	13777000	13777000	0	0	NaN	600	28	594	594	464	570	882	2017	882	2017	8959	882	2017	8959	882	2017	8959
O15018	2254	O15018	PDZ domain-containing protein 2;Processed PDZ domain-containing protein 2	PDZD2	0.98561	18.4496	2.56218e-44	119.88	105.46	119.88	1	T	PPHSLGRSRDSQVPVTSSVVPEAKASRGGLP	X;X;X;X;X;X;X;X;X;X;X;X;X;X;X;GalT_UC1;X;X;X;X;X;X;X;X;X;X;X;X;X;X;X	XXXXXXXPPPPPPPPPPPPPPPPPXXXXXXX	SRDSQVPVT(0.986)S(0.014)SVVPEAK	S(-64.22)RDS(-43.87)QVPVT(18.45)S(-18.45)S(-35.71)VVPEAK	9	3	0.2713	24193000	24193000	0	0	8.4825	605	29	2254	2254	90;497	114;608	182;932	469;2138	932	2138	17071	932	2138	17071	932	2138	17071
O15027	823	O15027	Protein transport protein Sec16A	SEC16A	1	177.337	0	436.6	415.35	344.96	1	T	HQEDTYGALDFTLSRTLENPVNVYNPSHSDS	X;X;X;X;X;X;X;X;X;X;X;X;X;X;X;GalT_UC1;X;X;X;X;X;X;X;X;X;X;X;X;X;X;X	XXXXXXXXXXXXXXXPPPPPPPPPPPPPPPP	T(1)LENPVNVYNPSHSDSLASQQSVASHPR	T(177.34)LENPVNVYNPS(-177.34)HS(-212.95)DS(-237.57)LAS(-267.39)QQS(-293.39)VAS(-331.43)HPR	1	4	0.16641	444510000	444510000	0	0	10.327	606	30	823	823	577	715	1133;1134;1135	2655;2656;2657;2658;2659;2660;2661;2662;2663;2664	1135	2661	32242	1134	2659	32370	1135	2661	32242
O15516	711	O15516	Circadian locomoter output cycles protein kaput	CLOCK	0.999999	61.6211	0.000176018	75.213	61.8	75.213	1	T	TQDRQIRFSQGQQLVTKLVTAPVACGAVMVP	X;X;X;X;X;X;X;X;X;X;X;X;X;X;X;GalT_UC1;X;X;X;X;X;X;X;X;X;X;X;X;X;X;X	XXXXXXXPPPPPPPPPPXXXXXXXXXXXXXX	FSQGQQLVT(1)K	FS(-61.62)QGQQLVT(61.62)K	9	3	0.77232	4648300	4648300	0	0	NaN	609	32	711	711	140	173	279	692	279	692	9160	279	692	9160	279	692	9160
O43426	1336	O43426	Synaptojanin-1	SYNJ1	1	92.8042	8.75357e-130	177.1	157.26	177.1	1	S	KIDPFEDLSFNLLAVSKAQLSVQTSPVPTPD	X;X;X;X;X;X;X;X;X;X;X;X;X;X;X;GalT_UC1;X;X;X;X;X;X;X;X;X;X;X;X;X;X;X	XPPPPPPPPPPPPPPPPXXXXXXXXXXXXXX	IDPFEDLSFNLLAVS(1)K	IDPFEDLS(-92.8)FNLLAVS(92.8)K	15	3	0.2305	11700000	11700000	0	0	NaN	47	35	1336	1336	201	244	381	896;897;898	381	898	93693	381	898	93693	381	898	93693
O43432	277	O43432	Eukaryotic translation initiation factor 4 gamma 3	EIF4G3	0.837671	7.41407	4.96163e-292	199.08	161.98	91.622	2	S	LPLPPSPTTVSSVARSTIAAPTSSALSSQPI	X;X;X;X;X;X;X;X;X;X;X;X;X;X;X;GalT_UC1;GalT_UC1;X;X;X;X;X;X;X;X;X;X;X;X;X;X	XXXXXXXXXXXXXXXPPPPPPPPPPPPPPPP	S(0.838)T(0.838)IAAPT(0.253)S(0.066)S(0.003)ALS(0.001)S(0.003)QPIFTTAIDDR	S(7.41)T(7.41)IAAPT(-7.41)S(-13.53)S(-28.17)ALS(-34.58)S(-28.17)QPIFT(-57.36)T(-65.63)AIDDR	1	4	0.097833	400850000	388480000	12375000	0	NaN	48	36	277	277	522	645;646	990;994	2267;2273	990	2267	53336	994	2273	64535	994	2273	64535
O43432	278	O43432	Eukaryotic translation initiation factor 4 gamma 3	EIF4G3	0.837671	7.41407	4.96163e-292	199.08	161.98	91.622	2	T	PLPPSPTTVSSVARSTIAAPTSSALSSQPIF	X;X;X;X;X;X;X;X;X;X;X;X;X;X;GalT_UC1;GalT_UC1;X;X;X;X;X;X;X;X;X;X;X;X;X;X;X	XXXXXXXXXXXXXXPPPPPPPPPPPPPPPPP	S(0.838)T(0.838)IAAPT(0.253)S(0.066)S(0.003)ALS(0.001)S(0.003)QPIFTTAIDDR	S(7.41)T(7.41)IAAPT(-7.41)S(-13.53)S(-28.17)ALS(-34.58)S(-28.17)QPIFT(-57.36)T(-65.63)AIDDR	2	4	0.097833	400850000	388480000	12375000	0	NaN	611	36	278	278	522	645;646	990;994	2267;2273	990	2267	53336	994	2273	64535	994	2273	64535
O43491	899	O43491	Band 4.1-like protein 2	EPB41L2	0.871156	8.30034	0.00521563	52.725	36.232	52.725	1	T	SQRTEISTKEVPIVQTETKTITYESPQIDGG	X;X;X;X;X;X;X;X;X;X;X;X;X;X;X;GalT_UC1;X;X;X;X;X;X;X;X;X;X;X;X;X;X;X	XXXXXXXXXPPPPPPPPPPXXXXXXXXXXXX	EVPIVQT(0.871)ET(0.129)K	EVPIVQT(8.3)ET(-8.3)K	7	3	-0.1779	4291400	4291400	0	0	NaN	613	37	899	899	120	148	238	594	238	594	13834	238	594	13834	238	594	13834
O43567	89	O43567	E3 ubiquitin-protein ligase RNF13	RNF13	0.999432	32.4704	2.10123e-47	112.13	92.08	112.13	1	S	ENACEPIVPPPVKDNSSGTFIVLIRRLDCNF	X;X;X;X;X;X;X;X;X;X;X;X;X;X;X;GalT_UC1;X;X;X;X;X;X;X;X;X;X;X;X;X;X;X	XXXXXXXXXXXXXPPPPPPPPPPPPXXXXXX	DNS(0.999)S(0.001)GTFIVLIR	DNS(32.47)S(-32.47)GT(-57.84)FIVLIR	3	3	0.92642	0	0	0	0	NaN	51	38	89	89	85	108	174;175	448;449	175	449	55273	175	449	55273	175	449	55273
O43670	266	O43670	BUB3-interacting and GLEBS motif-containing protein ZNF207	ZNF207	0.994643	22.4046	0	323.14	301.55	323.14	2	T	TKPLFPSAGQMGTPVTSSSTASSNSESLSAS	X;X;X;X;X;X;X;X;X;X;X;X;X;X;X;GalT_UC1;GalT_UC1;X;X;X;X;X;X;X;X;X;X;X;X;X;X	XXPPPPPPPPPPPPPPPPPPPPPPPPPPPPP	PLFPSAGQMGT(0.074)PVT(0.995)S(0.931)SSTASSNSESLSASSK	PLFPS(-86.01)AGQMGT(-11.28)PVT(22.4)S(11.28)S(-33.38)S(-75.79)T(-105.97)AS(-153.04)S(-170.68)NS(-195.8)ES(-240.84)LS(-266.14)AS(-274.49)S(-281.02)K	14	4	0.18007	359060000	0	359060000	0	NaN	614	39	266	266	367	446	691	1541;1542;1543;1544;1545;1546	691	1542	38207	691	1542	38207	691	1542	38207
O43670	267	O43670	BUB3-interacting and GLEBS motif-containing protein ZNF207	ZNF207	0.930607	11.2763	0	323.14	301.55	323.14	2	S	KPLFPSAGQMGTPVTSSSTASSNSESLSASS	X;X;X;X;X;X;X;X;X;X;X;X;X;X;GalT_UC1;GalT_UC1;X;X;X;X;X;X;X;X;X;X;X;X;X;X;X	XPPPPPPPPPPPPPPPPPPPPPPPPPPPPPP	PLFPSAGQMGT(0.074)PVT(0.995)S(0.931)SSTASSNSESLSASSK	PLFPS(-86.01)AGQMGT(-11.28)PVT(22.4)S(11.28)S(-33.38)S(-75.79)T(-105.97)AS(-153.04)S(-170.68)NS(-195.8)ES(-240.84)LS(-266.14)AS(-274.49)S(-281.02)K	15	4	0.18007	359060000	0	359060000	0	NaN	52	39	267	267	367	446	691	1541;1542;1543;1544;1545;1546	691	1542	38207	691	1542	38207	691	1542	38207
O43670	321	O43670	BUB3-interacting and GLEBS motif-containing protein ZNF207	ZNF207	0.975779	16.5468	1.26172e-05	41.76	23.622	41.76	1	T	PLNSTPATTTEPPKPTFPAYTQSTASTTSTT	X;X;X;X;X;X;X;X;X;X;X;X;X;X;X;GalT_UC1;X;X;X;X;X;X;X;X;X;X;X;X;X;X;X	XXXXXXXXXXXXXXPPPPPPPPPPPPPPPPP	PT(0.976)FPAYT(0.022)QS(0.001)T(0.001)ASTTSTTNSTAAK	PT(16.55)FPAYT(-16.55)QS(-30.02)T(-30.02)AS(-38.57)T(-39.48)T(-40.88)S(-41.44)T(-41.44)T(-41.44)NS(-41.7)T(-41.7)AAK	2	3	1.39	8244100	8244100	0	0	NaN	615	39	321	321	385	470	727	1644	727	1644	22948	727	1644	22948	727	1644	22948
O60675	153	O60675	Transcription factor MafK	MAFK	0.999763	38.3919	2.03088e-128	172.11	152.84	119.16	1	S	TIVKSTELSSTSVPFSAAS____________	X;X;X;X;X;X;X;X;X;X;X;X;X;X;X;GalT_UC1;X;X;X;X;X;X;X;X;X;X;X;X;X;X;X	XXXXPPPPPPPPPPPPPPPXXXXXXXXXXXX	STELSSTSVPFS(1)AAS	S(-96.35)T(-88.61)ELS(-80.15)S(-71.04)T(-61.32)S(-40.39)VPFS(38.39)AAS(-38.39)	12	2	-0.043664	620670000	620670000	0	0	NaN	54	41	153	153	519	641	983;984	2257;2258;2259	984	2259	42452	983	2258	42171	983	2258	42171
O60907	169	O60907	F-box-like/WD repeat-containing protein TBL1X	TBL1X	0.998098	28.3274	2.51692e-56	113.53	106.08	113.53	1	T	LAQQQASAAAAAAAATAAATAATTTSAGVSH	X;X;X;X;X;X;X;X;X;X;X;X;X;X;X;GalT_UC1;X;X;X;X;X;X;X;X;X;X;X;X;X;X;X	PPPPPPPPPPPPPPPPPPPPPPPPPPPPPPP	LAQQQAS(0.001)AAAAAAAAT(0.998)AAATAATTTSAGVSHQNPSK	LAQQQAS(-28.33)AAAAAAAAT(28.33)AAAT(-34.17)AAT(-44.65)T(-49.19)T(-53.64)S(-58)AGVS(-75.16)HQNPS(-68.82)K	16	4	0.22922	12990000	12990000	0	0	NaN	618	43	169	169	263	326	525	1201	525	1201	49527	525	1201	49527	525	1201	49527
O75170	887	O75170	Serine/threonine-protein phosphatase 6 regulatory subunit 2	PPP6R2	1	167.721	1.80124e-201	191.93	182.01	191.93	1	T	DSRLLSPACPAPKEVTAAPAVAVPPEATVAI	X;X;X;X;X;X;X;X;X;X;X;X;X;X;X;GalT_UC1;X;X;X;X;X;X;X;X;X;X;X;X;X;X;X	XXXXXXXXXXXXXPPPPPPPPPPPPPPPPPP	EVT(1)AAPAVAVPPEATVAITTALSK	EVT(167.72)AAPAVAVPPEAT(-167.72)VAIT(-186.67)T(-188.96)ALS(-190.78)K	3	3	0.087707	29826000	29826000	0	0	NaN	619	44	887	887	123	151	242;243	598;599	243	599	80030	243	599	80030	243	599	80030
O75179	1820	O75179	Ankyrin repeat domain-containing protein 17	ANKRD17	0.93949	13.8609	0.000143011	66.673	66.673	43.955	2	S	PKNRLKSSSANSKIGSSAPTTTAANTSLMGI	X;X;X;X;X;X;X;X;X;X;X;X;X;X;X;GalT_UC1;GalT_UC1;X;X;X;X;X;X;X;X;X;X;X;X;X;X	XXXXXXXXXXXXXPPPPPPPPPPPPPPPPPP	IGS(0.939)S(0.939)APT(0.084)T(0.028)T(0.009)AANTSLMGIK	IGS(13.86)S(13.86)APT(-13.86)T(-20.23)T(-26.13)AANT(-42.63)S(-43.62)LMGIK	3	3	0.0070113	238030000	0	238030000	0	NaN	55	45	1820	1820	210	256	402;403	951;952	402	951	24110	403	952	24260	403	952	24260
O75179	1821	O75179	Ankyrin repeat domain-containing protein 17	ANKRD17	0.93949	13.8609	0.000143011	66.673	66.673	43.955	2	S	KNRLKSSSANSKIGSSAPTTTAANTSLMGIK	X;X;X;X;X;X;X;X;X;X;X;X;X;X;GalT_UC1;GalT_UC1;X;X;X;X;X;X;X;X;X;X;X;X;X;X;X	XXXXXXXXXXXXPPPPPPPPPPPPPPPPPPP	IGS(0.939)S(0.939)APT(0.084)T(0.028)T(0.009)AANTSLMGIK	IGS(13.86)S(13.86)APT(-13.86)T(-20.23)T(-26.13)AANT(-42.63)S(-43.62)LMGIK	4	3	0.0070113	238030000	0	238030000	0	NaN	56	45	1821	1821	210	256	402;403	951;952	402	951	24110	403	952	24260	403	952	24260
O75179	2001	O75179	Ankyrin repeat domain-containing protein 17	ANKRD17	1	101.644	2.4752e-12	101.64	77.894	101.64	1	T	NGSPSSPSVRRQLFVTVVKTSNATTTTVTTT	X;X;X;X;X;X;X;X;X;X;X;X;X;X;X;GalT_UC1;X;X;X;X;X;X;X;X;X;X;X;X;X;X;X	XXXXXXXXXXPPPPPPPPPXXXXXXXXXXXX	RQLFVT(1)VVK	RQLFVT(101.64)VVK	6	3	-0.26746	330590000	330590000	0	0	28.029	622	45	2001	2001	412;436	500;533	766;767;818	1721;1722;1723;1724;1725;1850;1851	818	1850	15013	818	1850	15013	818	1850	15013
O75376	1027	O75376	Nuclear receptor corepressor 1	NCOR1	0.984921	18.7784	1.92412e-26	108.58	99.105	88.507	1	T	HQVITNLPEGVRLPTTRPTRPPPPLIPSSKT	X;X;X;X;X;X;X;X;X;X;X;X;X;X;X;GalT_UC1;X;X;X;X;X;X;X;X;X;X;X;X;GalT_UC1;X;X	XXXXXXXXXXXXPPPPPPPPPPPPPPPPPPX	LPT(0.013)T(0.985)RPT(0.002)RPPPPLIPSSK	LPT(-18.78)T(18.78)RPT(-26.86)RPPPPLIPS(-67.18)S(-75.23)K	4	5	-0.1135	85062000	85062000	0	0	NaN	625	46	1027	1027	291	356	564;565	1286;1287;1288;1289;1290;1291	565	1291	20457	564	1287	20304	564	1287	20304
O75376	1040	O75376	Nuclear receptor corepressor 1	NCOR1	0.838269	7.14593	0.00380034	72.325	46.888	72.325	1	S	PTTRPTRPPPPLIPSSKTTVASEKPSFIMGG	X;X;X;X;X;X;X;X;X;X;X;X;X;X;X;GalT_UC1;X;X;GalT_UC1;X;X;X;X;X;X;X;X;X;X;X;X	XXXXPPPPPPPPPPPPPXXXXXXXXXXXXXX	PTRPPPPLIPS(0.162)S(0.838)K	PT(-58.58)RPPPPLIPS(-7.15)S(7.15)K	12	3	0.044248	37222000	37222000	0	0	NaN	61	46	1040	1040	291;388	356;474	733;734	1659;1660;1661	734	1661	12997	734	1661	12997	734	1661	12997
O75376	1877	O75376	Nuclear receptor corepressor 1	NCOR1	0.989166	19.6137	2.26945e-39	124.21	101.99	124.21	1	S	EQQQLEQKTLEVEKRSVQCLYTSSAFPSGKP	X;X;X;X;X;X;X;X;X;X;X;X;X;X;X;GalT_UC1;X;X;X;X;X;X;X;X;X;X;X;X;X;X;X	XXXXXXXXXXXXXXXPPPPPPPPPPPPPPPX	S(0.989)VQCLYT(0.011)SSAFPSGK	S(19.61)VQCLYT(-19.61)S(-46.56)S(-69.01)AFPS(-113.66)GK	1	3	-0.13478	13120000	13120000	0	0	NaN	63	46	1877	1877	537	665;666	1039	2389;2390	1039	2390	29423	1039	2390	29423	1039	2390	29423
O75376	1883	O75376	Nuclear receptor corepressor 1	NCOR1	0.913958	8.15993	0.00428392	53.237	38.421	53.237	2	T	QKTLEVEKRSVQCLYTSSAFPSGKPQPHSSV	X;X;X;X;X;X;X;X;X;X;X;X;X;X;X;GalT_UC1;X;GalT_UC1;X;X;X;X;X;X;X;X;X;X;X;X;X	XXXXXXXXXPPPPPPPPPPPPPPPXXXXXXX	S(0.017)VQCLYT(0.914)S(0.507)S(0.548)AFPS(0.014)GK	S(-19.14)VQCLYT(8.16)S(-0.42)S(0.42)AFPS(-16.09)GK	7	4	-0.5867	11591000	0	11591000	0	NaN	628	46	1883	1883	537	665;666	1038	2388	1038	2388	20169	1038	2388	20169	1038	2388	20169
O75376	2233	O75376	Nuclear receptor corepressor 1	NCOR1	0.976217	18.1733	1.66075e-12	66.828	51.062	66.828	1	T	SSGGGDSDMAAAQPGTEIFNLPAVTTSGSVS	X;X;X;X;X;X;X;X;X;X;X;X;X;X;X;GalT_UC1;X;X;X;X;X;X;X;X;X;X;X;X;X;X;X	PPPPPPPPPPPPPPPPPPPPPPPPPPPPPPP	KLNSSGGGDS(0.004)DMAAAQPGT(0.976)EIFNLPAVT(0.015)T(0.002)S(0.002)GSVSSR	KLNS(-46.8)S(-42.24)GGGDS(-23.73)DMAAAQPGT(18.17)EIFNLPAVT(-18.17)T(-26.5)S(-26.5)GS(-39.53)VS(-39.53)S(-39.53)R	19	4	-0.14614	47023000	47023000	0	0	NaN	623	46	2233	2233	247	304	490	1142;1143	490	1143	61607	490	1143	61607	490	1143	61607
O76096	114	O76096	Cystatin-F	CST7	0.89787	9.44061	0.0284105	41.283	31.002	41.283	1	T	CKKNQHLRLDDCDFQTNHTLKQTLSCYSEVW	X;X;X;X;X;X;X;X;X;X;X;X;X;X;X;GalT_UC1;X;X;X;X;X;X;X;X;X;X;X;X;X;X;X	XXXXXXXXPPPPPPPPPPPPPXXXXXXXXXX	LDDCDFQT(0.898)NHT(0.102)LK	LDDCDFQT(9.44)NHT(-9.44)LK	8	3	-1.1518	23321000	23321000	0	0	NaN	630	47	114	114	268	331	533	1216	533	1216	14488	533	1216	14488	533	1216	14488
O94901	734	O94901	SUN domain-containing protein 1	SUN1	0.908847	10.475	0.0024955	63.727	30.318	63.727	1	S	TLEHIPKTLSPTGNISSAPKDFAVYGLENEY	X;X;X;X;X;X;X;X;X;X;X;X;X;X;X;GalT_UC1;X;X;X;X;X;X;X;X;X;X;X;X;X;X;X	XXXXXXXPPPPPPPPPPPPPXXXXXXXXXXX	TLS(0.001)PT(0.008)GNIS(0.909)S(0.081)APK	T(-35.09)LS(-29.55)PT(-20.34)GNIS(10.48)S(-10.48)APK	9	3	-1.0704	9208600	9208600	0	0	NaN	65	49	734	734	583	726	1158	2726	1158	2726	12426	1158	2726	12426	1158	2726	12426
O94913	181	O94913	Pre-mRNA cleavage complex 2 protein Pcf11	PCF11	0.982495	18.6363	4.40995e-120	156.67	137.79	156.67	1	S	LNKSPEEPSTPGTVVSSPSISTPPIVPDIQK	X;X;X;X;X;X;X;X;X;X;X;X;X;X;X;GalT_UC1;X;X;X;X;X;X;X;X;X;X;X;X;X;X;X	XXXPPPPPPPPPPPPPPPPPPPPPPPPPPPP	SPEEPSTPGT(0.002)VVS(0.982)S(0.013)PS(0.002)ISTPPIVPDIQK	S(-72.76)PEEPS(-53.36)T(-36.44)PGT(-27.64)VVS(18.64)S(-18.64)PS(-27.64)IS(-36.44)T(-36.44)PPIVPDIQK	13	4	0.18426	28892000	28892000	0	0	NaN	66	50	181	181	482	589	905	2071;2072;2073;2074	905	2074	68231	905	2074	68231	905	2074	68231
O95486	162	O95486	Protein transport protein Sec24A	SEC24A	0.976525	19.7282	9.00419e-170	177.56	160.75	177.56	1	S	SQTNHCPRASSQPTVSGNTSLTTNHQYVSSG	X;X;X;X;X;X;X;X;X;X;X;X;X;X;X;GalT_UC1;X;X;X;X;X;X;X;X;X;X;X;X;X;X;X	XXXXXXXXPPPPPPPPPPPPPPPPPPPPPPP	AS(0.001)S(0.001)QPT(0.01)VS(0.977)GNT(0.01)SLTTNHQYVSSGYPSLQNSFIK	AS(-29.28)S(-29.28)QPT(-19.73)VS(19.73)GNT(-19.73)S(-34.77)LT(-45.84)T(-45.84)NHQYVS(-66.79)S(-76.06)GYPS(-114.87)LQNS(-151.42)FIK	8	4	0.025757	501490000	501490000	0	0	41.068	72	52	162	162	51	67	121	357;358	121	358	52718	121	358	52718	121	358	52718
O95487	342	O95487	Protein transport protein Sec24B	SEC24B	0.977505	19.172	1.63306e-201	190.46	172.76	190.46	1	S	TRTPPTANHPVEPVTSVTQPSELLQQKGVQY	X;X;X;X;X;X;X;X;X;X;X;X;X;X;X;GalT_UC1;X;X;X;X;X;X;X;X;X;X;X;X;X;X;X	XXPPPPPPPPPPPPPPPPPPPPPPPPPXXXX	TPPTANHPVEPVT(0.012)S(0.978)VT(0.01)QPS(0.001)ELLQQK	T(-109.44)PPT(-109.44)ANHPVEPVT(-19.17)S(19.17)VT(-19.9)QPS(-31.65)ELLQQK	14	4	-0.00083365	293360000	293360000	0	0	34.219	75	53	342	342	597	743	1180	2793;2794;2795;2796;2797;2798	1180	2796	40959	1180	2796	40959	1180	2796	40959
O95487	344	O95487	Protein transport protein Sec24B	SEC24B	0.898908	9.93256	7.00772e-179	185.33	167.75	185.33	1	T	TPPTANHPVEPVTSVTQPSELLQQKGVQYGE	X;X;X;X;X;X;X;X;X;X;X;X;X;X;X;GalT_UC1;X;X;X;X;X;X;X;X;X;X;X;X;X;X;X	PPPPPPPPPPPPPPPPPPPPPPPPPXXXXXX	TPPTANHPVEPVTS(0.091)VT(0.899)QPS(0.01)ELLQQK	T(-133.45)PPT(-119.44)ANHPVEPVT(-38.52)S(-9.93)VT(9.93)QPS(-19.68)ELLQQK	16	4	-0.044692	725310000	725310000	0	0	84.603	633	53	344	344	597	743	1181;1182	2799;2800;2801;2802;2803;2804;2805;2806	1182	2806	42388	1182	2806	42388	1182	2806	42388
O95628	309	O95628	CCR4-NOT transcription complex subunit 4	CNOT4	0.932845	11.4276	3.35291e-164	162.68	145.77	162.68		S	ISNSDTPSPPPGLSKSNPVIPISSSNHSARS	X;X;X;X;X;X;X;X;X;X;X;X;X;X;X;GalT_UC1;X;X;X;X;X;X;X;X;X;X;X;X;X;X;GalT_UC1	XXXXXXXXXXXXXXXPPPPPPPPPPPPPPPX	S(0.933)NPVIPIS(0.067)SSNHSAR	S(11.43)NPVIPIS(-11.43)S(-53.97)S(-80.27)NHS(-135.1)AR	1	3	0.14128	101660000	101660000	0	0	NaN	76	54	309	309	475	582	897	2043	897	2043	9808	897	2043	9808	897	2043	9808
O95628	324	O95628	CCR4-NOT transcription complex subunit 4	CNOT4	0.990167	20.1016	1.70847e-14	95.666	90.123	95.666	1	S	SNPVIPISSSNHSARSPFEGAVTESQSLFSD	GalT_UC1;X;X;X;X;X;X;GalT_UC1;X;X;X;X;X;X;X;GalT_UC1;X;X;X;X;X;X;X;X;X;X;X;X;X;X;X	XXXXXXXXXXXXXXXPPPPPPPPPPPPPPPP	S(0.99)PFEGAVT(0.01)ESQSLFSDNFR	S(20.1)PFEGAVT(-20.1)ES(-38.05)QS(-53.75)LFS(-62.58)DNFR	1	3	-0.17894	21202000	21202000	0	0	NaN	78	54	324	324	483	590	906	2075;2076	906	2075	64614	906	2075	64614	906	2075	64614
O95865	167	O95865	N(G),N(G)-dimethylarginine dimethylaminohydrolase 2	DDAH2	0.851891	7.88303	1.93063e-09	72.681	49.77	72.681		S	VADTFRDFAVSTVPVSGPSHLRGLCGMGGPR	X;X;X;X;X;X;X;X;X;X;X;X;X;X;X;GalT_UC1;X;X;X;X;X;X;X;X;X;X;X;X;X;X;X	XXXXXXPPPPPPPPPPPPPPPPXXXXXXXXX	DFAVS(0.005)T(0.139)VPVS(0.852)GPS(0.005)HLR	DFAVS(-22.58)T(-7.88)VPVS(7.88)GPS(-22.58)HLR	10	3	0.2353	7450100	7450100	0	0	NaN	79	55	167	167	77	100	164	431	164	431	36212	164	431	36212	164	431	36212
O96005	297	O96005	Cleft lip and palate transmembrane protein 1	CLPTM1	0.99973	35.6895	0.00186985	53.869	42.497	53.869	1	S	NDYWNLQKDYYPINESLASLPLRVSFCPLSL	X;X;X;X;X;X;X;X;X;X;X;X;X;X;X;GalT_UC1;X;X;X;X;X;X;X;X;X;X;X;X;X;X;X	XXXXXXXXPPPPPPPPPPPPPPPXXXXXXXX	DYYPINES(1)LASLPLR	DYYPINES(35.69)LAS(-35.69)LPLR	8	3	-0.54377	0	0	0	0	NaN	80	56	297	297	94	119	196	491	196	491	73502	196	491	73502	196	491	73502
P02545	612	P02545	Prelamin-A/C;Lamin-A/C	LMNA	0.999999	61.9978	0	278.27	256.74	278.27	1;2	S	KASASGSGAQVGGPISSGSSASSVTVTRSYR	X;X;X;X;X;X;X;X;X;X;X;X;X;X;X;GalT_UC1;GalT_UC1;X;X;X;X;X;X;X;X;X;X;X;X;X;X	XPPPPPPPPPPPPPPPPPPPPPPPPPPPXXX	ASASGSGAQVGGPIS(1)S(1)GSSASSVTVTR	AS(-82.31)AS(-62.76)GS(-62.76)GAQVGGPIS(62)S(62)GS(-62)S(-62)AS(-94.25)S(-114.63)VT(-152.6)VT(-180.37)R	15	4	-0.48427	641020000	208140000	432880000	0	4.5754	84	58	612	612	41	51;52	87;88;91	252;253;254;255;256;272;273;274;275;276	88	256	15836	88	256	15836	88	256	15836
P02545	613	P02545	Prelamin-A/C;Lamin-A/C	LMNA	0.999998	61.9978	0	278.27	256.74	278.27	1;2	S	ASASGSGAQVGGPISSGSSASSVTVTRSYRS	X;X;X;X;X;X;X;X;X;X;X;X;X;X;GalT_UC1;GalT_UC1;X;X;X;X;X;X;X;X;X;X;X;X;X;X;X	PPPPPPPPPPPPPPPPPPPPPPPPPPPXXXX	ASASGSGAQVGGPIS(1)S(1)GSSASSVTVTR	AS(-82.31)AS(-62.76)GS(-62.76)GAQVGGPIS(62)S(62)GS(-62)S(-62)AS(-94.25)S(-114.63)VT(-152.6)VT(-180.37)R	16	4	-0.48427	5400900000	4968000000	432880000	0	38.549	85	58	613	613	41	51;52	87;88;89	252;253;254;255;256;257;258;259;260;261;262;263;264;265;266;267;268	88	256	15836	88	256	15836	89	260	22617
P02545	643	P02545	Prelamin-A/C;Lamin-A/C	LMNA	1	139.478	0	278.95	262.29	278.95	1	T	SVGGSGGGSFGDNLVTRSYLLGNSSPRTQSP	X;X;X;X;X;X;X;X;X;X;X;X;X;X;X;GalT_UC1;X;X;X;X;X;X;X;X;X;X;X;X;X;X;X	PPPPPPPPPPPPPPPPPXXXXXXXXXXXXXX	SVGGSGGGSFGDNLVT(1)R	S(-202.94)VGGS(-208.79)GGGS(-139.48)FGDNLVT(139.48)R	16	3	-0.043957	519190000	519190000	0	0	30.208	636	58	643	643	534	661	1033;1034	2376;2377;2378;2379;2380;2381;2382;2383	1033	2381	22968	1033	2381	22968	1033	2381	22968
P04062	310	P04062	Glucosylceramidase	GBA	0.772498	7.04911	3.66538e-23	104.24	78.771	104.24	1	S	QRDFIARDLGPTLANSTHHNVRLLMLDDQRL	X;X;X;X;X;X;X;X;X;X;X;X;X;X;X;GalT_UC1;X;X;X;X;X;X;X;X;X;X;X;X;X;X;X	XXXXXXXPPPPPPPPPPPPPPPXXXXXXXXX	DLGPT(0.152)LANS(0.772)T(0.075)HHNVR	DLGPT(-7.05)LANS(7.05)T(-10.12)HHNVR	9	4	-0.4035	11986000	11986000	0	0	NaN	86	59	310	310	79	102	167	436;437	167	437	8555	167	437	8555	167	437	8555
P04066	383	P04066	Tissue alpha-L-fucosidase	FUCA1	0.873864	8.96929	3.06731e-05	82.85	53.894	82.85	1	T	AIYASKPWRVQWEKNTTSVWYTSKGSAVYAI	X;X;X;X;X;X;X;X;X;X;X;X;X;X;X;GalT_UC1;X;X;X;X;X;X;X;X;X;X;X;X;X;X;X	XXXXXXXXXXXXXXPPPPPPPPPPXXXXXXX	NT(0.874)T(0.111)S(0.015)VWYTSK	NT(8.97)T(-8.97)S(-17.56)VWYT(-75.14)S(-76.28)K	2	3	0.39029	4654400	4654400	0	0	NaN	637	60	383	383	344	422	660	1468	660	1468	12139	660	1468	12139	660	1468	12139
P04792	174	P04792	Heat shock protein beta-1	HSPB1	0.999991	50.5574	2.57127e-231	209.64	184.47	209.64	1	T	PEGTLTVEAPMPKLATQSNEITIPVTFESRA	X;X;X;X;X;X;X;X;X;X;X;X;X;X;X;GalT_UC1;X;X;X;X;X;X;X;X;X;X;X;X;X;X;X	XXXXXXXXXXXXXPPPPPPPPPPPPPPPPPX	LAT(1)QSNEITIPVTFESR	LAT(50.56)QS(-50.56)NEIT(-147.26)IPVT(-174.55)FES(-202.98)R	3	3	-0.67552	19348000	19348000	0	0	NaN	639	64	174	174	265	328	530	1209;1210;1211	530	1211	55139	530	1211	55139	530	1211	55139
P04792	184	P04792	Heat shock protein beta-1	HSPB1	0.994461	22.8776	4.15093e-83	147.18	128.73	147.18	1	T	MPKLATQSNEITIPVTFESRAQLGGPEAAKS	X;X;X;X;X;X;X;X;X;X;X;X;X;X;X;GalT_UC1;X;X;X;X;X;X;X;X;X;X;X;X;X;X;X	XXXPPPPPPPPPPPPPPPPPXXXXXXXXXXX	LATQSNEIT(0.005)IPVT(0.994)FESR	LAT(-75.9)QS(-58.9)NEIT(-22.88)IPVT(22.88)FES(-33.83)R	13	3	-0.32544	649600000	649600000	0	0	NaN	640	64	184	184	265	328	529	1207;1208	529	1208	52773	529	1208	52773	529	1208	52773
P04792	187	P04792	Heat shock protein beta-1	HSPB1	0.774178	5.35077	4.62061e-20	122.42	103.18	122.42	1	S	LATQSNEITIPVTFESRAQLGGPEAAKSDET	X;X;X;X;X;X;X;X;X;X;X;X;X;X;X;GalT_UC1;X;X;X;X;X;X;X;X;X;X;X;X;X;X;X	PPPPPPPPPPPPPPPPPXXXXXXXXXXXXXX	LATQSNEITIPVT(0.226)FES(0.774)R	LAT(-68.22)QS(-83.98)NEIT(-60.89)IPVT(-5.35)FES(5.35)R	16	2	0.057636	71672000	71672000	0	0	NaN	88	64	187	187	265	328	528	1205;1206	528	1205	52475	528	1205	52475	528	1205	52475
P05387	74	P05387	60S acidic ribosomal protein P2	RPLP2	0.999988	49.5758	4.34e-147	169.05	156.01	169.05	1	S	IGKLASVPAGGAVAVSAAPGSAAPAAGSAPA	X;X;X;X;X;X;X;X;X;X;X;X;X;X;X;GalT_UC1;X;X;X;X;X;X;X;X;X;X;X;X;X;X;X	XXXPPPPPPPPPPPPPPPPPPPPPPPPPPPP	LASVPAGGAVAVS(1)AAPGSAAPAAGSAPAAAEEK	LAS(-60.61)VPAGGAVAVS(49.58)AAPGS(-49.58)AAPAAGS(-97.02)APAAAEEK	13	4	-0.019397	193760000	193760000	0	0	NaN	89	65	74	74	264	327	526;527	1202;1203;1204	527	1204	42598	527	1204	42598	527	1204	42598
P05783	30	P05783	Keratin, type I cytoskeletal 18	KRT18	0.997534	26.0696	0	322.31	291.39	306.64	1	S	SLGSVQAPSYGARPVSSAASVYAGAGGSGSR	GalT_UC1;X;X;X;X;X;X;X;X;X;X;X;X;X;X;GalT_UC1;X;X;X;X;X;X;X;X;X;X;X;X;X;X;X	XXXXXXXXXXXXXPPPPPPPPPPPPPPPPPP	PVS(0.998)S(0.002)AASVYAGAGGSGSR	PVS(26.07)S(-26.07)AAS(-120.13)VYAGAGGS(-269.2)GS(-289.67)R	3	3	-0.040762	1290300000	1290300000	0	0	57.308	90	66	30	30	393	479	740;741;742;743	1675;1676;1677;1678;1679;1680;1681;1682;1683;1684	741	1680	11638	740	1678	11056	741	1680	11638
P07711	218	P07711	Cathepsin L1;Cathepsin L1 heavy chain;Cathepsin L1 light chain	CTSL	0.999544	33.4129	0.00309023	45.614	35.865	45.614		S	PYEATEESCKYNPKYSVANDTGFVDIPKQEK	X;X;X;X;X;X;X;X;X;X;X;X;X;X;X;GalT_UC1;X;X;X;X;X;X;X;X;X;X;X;X;X;X;X	XXXXXXXXXXXXXXPPPPPPPPPPPPPPXXX	YS(1)VANDTGFVDIPK	YS(33.41)VANDT(-33.41)GFVDIPK	2	3	-0.98241	18137000	18137000	0	0	NaN	94	70	218	218	725	898	1395	3305	1395	3305	43302	1395	3305	43302	1395	3305	43302
P07858	194	P07858	Cathepsin B;Cathepsin B light chain;Cathepsin B heavy chain	CTSB	0.839494	7.23804	0.000239008	57.293	39.154	57.293	1	S	CRPYSIPPCEHHVNGSRPPCTGEGDTPKCSK	X;X;X;X;X;X;X;X;X;X;X;X;X;X;X;GalT_UC1;X;X;X;X;X;X;X;X;X;X;X;X;X;X;X	XXPPPPPPPPPPPPPPPPPPPPPPPPPPXXX	PYS(0.002)IPPCEHHVNGS(0.839)RPPCT(0.159)GEGDTPK	PYS(-26.71)IPPCEHHVNGS(7.24)RPPCT(-7.24)GEGDT(-37.56)PK	14	5	-1.0138	29016000	29016000	0	0	NaN	95	71	194	194	396	483	747	1691	747	1691	11260	747	1691	11260	747	1691	11260
P08670	49	P08670	Vimentin	VIM	0.935969	11.6568	6.20814e-91	159.94	124.64	159.94	1	S	STRTYSLGSALRPSTSRSLYASSPGGVYATR	X;X;X;X;X;X;X;X;X;X;X;X;X;X;X;GalT_UC1;X;X;X;X;X;X;X;X;X;X;X;X;X;X;X	XXXPPPPPPPPPPPPPPXXXXXXXXXXXXXX	TYSLGSALRPST(0.064)S(0.936)R	T(-147.58)YS(-127.66)LGS(-88.7)ALRPS(-38.92)T(-11.66)S(11.66)R	13	3	-0.52891	35646000	35646000	0	0	NaN	96	73	49	49	647	806	1266;1267	2983;2984;2985;2986	1266	2985	16785	1266	2985	16785	1266	2985	16785
P09769;P06241;P07947	181;186;195	P09769	Tyrosine-protein kinase Fgr;Tyrosine-protein kinase Fyn;Tyrosine-protein kinase Yes	FGR;FYN;YES1	1	50.0403	0.0334303	50.04	27.211	50.04	2	S	GAFLIRESETTKGAYSLSIRDWDQTRGDHVK	X;X;X;X;X;X;X;X;X;X;X;X;X;X;X;GalT_UC1;X;GalT_UC1;X;X;X;X;X;X;X;X;X;X;X;X;X	XXXXXXXXXXXXPPPPPPPPXXXXXXXXXXX	GAYS(1)LS(1)IR	GAYS(50.04)LS(50.04)IR	4	3	-0.71321	6082200	0	6082200	0	NaN	92	67	181	181	150	186	295	723	295	723	28643	295	723	28643	295	723	28643
P09769;P06241;P07947	183;188;197	P09769	Tyrosine-protein kinase Fgr;Tyrosine-protein kinase Fyn;Tyrosine-protein kinase Yes	FGR;FYN;YES1	1	50.0403	0.0334303	50.04	27.211	50.04	2	S	FLIRESETTKGAYSLSIRDWDQTRGDHVKHY	X;X;X;X;X;X;X;X;X;X;X;X;X;GalT_UC1;X;GalT_UC1;X;X;X;X;X;X;X;X;X;X;X;X;X;X;X	XXXXXXXXXXPPPPPPPPXXXXXXXXXXXXX	GAYS(1)LS(1)IR	GAYS(50.04)LS(50.04)IR	6	3	-0.71321	6082200	0	6082200	0	NaN	93	67	183	183	150	186	295	723	295	723	28643	295	723	28643	295	723	28643
P0C7T5	203	P0C7T5	Ataxin-1-like	ATXN1L	0.841708	7.87112	1.2344e-33	110.94	101.25	92.275	1	S	PPQAPSPAHSFNKAPSATSPSGQLPHHSSTQ	X;X;X;X;X;X;X;X;X;X;X;X;X;X;X;GalT_UC1;X;X;X;X;X;X;X;X;X;X;X;X;X;X;X	XXXXXXXXXXXXXPPPPPPPPPPPPPPPPPP	APS(0.842)AT(0.137)S(0.021)PSGQLPHHSSTQPLDLAPGR	APS(7.87)AT(-7.87)S(-16.08)PS(-39.19)GQLPHHS(-73.11)S(-75.65)T(-78.05)QPLDLAPGR	3	4	0.77231	56744000	56744000	0	0	10.987	98	78	203	203	27	31	50;51	144;145;146;147;148;149	51	148	24813	50	144	24758	50	144	24758
P12270	1660	P12270	Nucleoprotein TPR	TPR	0.787273	6.5799	1.08311e-19	78.236	74.134	78.236	1	S	ITLKTTPASGERGIASTSDPPTANIKPTPVV	X;X;X;X;X;X;X;X;X;X;X;X;X;X;X;GalT_UC1;X;X;X;X;X;X;X;X;X;X;X;X;X;X;X	XXXXXXXXXXXXPPPPPPPPPPPPPPPPPPP	GIAS(0.787)T(0.173)S(0.039)DPPTANIKPTPVVSTPSK	GIAS(6.58)T(-6.58)S(-13.02)DPPT(-32.69)ANIKPT(-47.99)PVVS(-62.56)T(-66.47)PS(-69.65)K	4	3	0.2082	70933000	70933000	0	0	NaN	100	81	1660	1660	161	199	312	754;755	312	754	31925	312	754	31925	312	754	31925
P12757	74	P12757	Ski-like protein	SKIL	0.852746	10.6379	6.60891e-24	107.37	90.878	107.37	1	T	EAPVETDGEHVKRTCTSVPETLHLNPSLKHT	X;X;X;X;X;X;X;X;X;X;X;X;X;X;X;GalT_UC1;X;X;X;X;X;X;X;X;X;X;X;X;X;X;X	XXXXXXXXXXXXXPPPPPPPPPPPPPPPPXX	T(0.074)CT(0.853)S(0.074)VPETLHLNPSLK	T(-10.64)CT(10.64)S(-10.64)VPET(-57.89)LHLNPS(-81.55)LK	3	4	-0.57584	14401000	14401000	0	0	NaN	641	82	74	74	553	686	1092	2531;2532	1092	2532	31718	1092	2532	31718	1092	2532	31718
P14625	64	P14625	Endoplasmin	HSP90B1	1	119.386	2.54086e-39	119.39	97.065	119.39	1	S	VQREEEAIQLDGLNASQIRELREKSEKFAFQ	X;X;X;X;X;X;X;X;X;X;X;X;X;X;X;GalT_UC1;X;X;X;X;X;X;X;X;X;X;X;X;X;X;X	XXXPPPPPPPPPPPPPPPPXXXXXXXXXXXX	EEEAIQLDGLNAS(1)QIR	EEEAIQLDGLNAS(119.39)QIR	13	3	0.08118	26379000	26379000	0	0	NaN	102	84	64	64	98	124	201	499;500	201	500	48198	201	500	48198	201	500	48198
P14625	219	P14625	Endoplasmin	HSP90B1	1	136.256	0	323.08	314.99	323.08	1	T	LVADKVIVTSKHNNDTQHIWESDSNEFSVIA	X;X;X;X;X;X;X;X;X;X;X;X;X;X;X;GalT_UC1;X;X;X;X;X;X;X;X;X;X;X;X;X;X;X	XXXXXXXXXXXPPPPPPPPPPPPPPPPPPPP	HNNDT(1)QHIWESDSNEFSVIADPR	HNNDT(136.26)QHIWES(-136.26)DS(-184.04)NEFS(-273.55)VIADPR	5	4	-0.04076	550440000	550440000	0	0	NaN	642	84	219	219	194	237	371;372;373	872;873;874;875;876;877;878;879;880;881;882;883;884;885	372	880	46204	372	880	46204	372	880	46204
P15822	845	P15822	Zinc finger protein 40	HIVEP1	0.878379	8.63866	6.19707e-15	86.727	66.359	86.727	1	T	SLDCLPITRSNSMPTTGYSAVPANIIPPPHP	X;X;X;X;X;X;X;X;X;X;X;X;X;X;X;GalT_UC1;X;X;X;X;X;X;X;X;X;X;X;X;X;X;X	XXXXXXXXXPPPPPPPPPPPPPPPPPPPPPP	SNSMPT(0.12)T(0.878)GYSAVPANIIPPPHPLR	S(-32.61)NS(-32.61)MPT(-8.64)T(8.64)GYS(-32.61)AVPANIIPPPHPLR	7	4	-0.33739	5460900	5460900	0	0	NaN	648	87	845	845	477	584	899	2045	899	2045	53995	899	2045	53995	899	2045	53995
P15822	1919	P15822	Zinc finger protein 40	HIVEP1	0.881288	8.87382	2.48159e-20	93.766	79.934	93.766	1	S	GDKVNIQEQSQQPVTSLSLFNIKDTQQLAFP	X;X;X;X;X;X;X;X;X;X;X;X;X;X;X;GalT_UC1;X;X;X;X;X;X;X;X;X;X;X;X;X;X;X	XXXPPPPPPPPPPPPPPPPPPPPXXXXXXXX	VNIQEQSQQPVT(0.114)S(0.881)LS(0.004)LFNIK	VNIQEQS(-33.46)QQPVT(-8.87)S(8.87)LS(-23.33)LFNIK	13	3	0.63488	7015900	7015900	0	0	NaN	107	87	1919	1919	673	838	1312	3115;3116	1312	3116	63915	1312	3116	63915	1312	3116	63915
P15822	2325	P15822	Zinc finger protein 40	HIVEP1	0.997949	27.4011	0.00309182	62.408	39.874	62.408	1	T	EEILRSSMAGKAVAITQSPSSVRLPPAAAEH	X;X;X;X;X;X;X;X;X;X;X;X;X;X;X;GalT_UC1;X;X;X;X;X;X;X;X;X;X;X;X;X;X;X	XXXXXXXXXXXPPPPPPPPPPPPXXXXXXXX	AVAIT(0.998)QS(0.002)PSSVR	AVAIT(27.4)QS(-27.4)PS(-36.97)S(-44.6)VR	5	3	0.45958	28149000	28149000	0	0	5.8182	647	87	2325	2325	61	82	141	391	141	391	11915	141	391	11915	141	391	11915
P15880	285	P15880	40S ribosomal protein S2	RPS2	0.99999	51.4129	0.0082744	55.567	44.923	55.567	1	T	TDHLVKTHTRVSVQRTQAPAVATT_______	X;X;X;X;X;X;X;X;X;X;X;X;X;X;X;GalT_UC1;X;X;X;X;X;X;X;X;X;X;X;X;X;X;X	XXXXXXXXXXXXXXXPPPPPPPPPXXXXXXX	T(1)QAPAVATT	T(51.41)QAPAVAT(-51.41)T(-55.57)	1	2	0.11045	50604000	50604000	0	0	NaN	650	88	285	285	603	751	1191	2823	1191	2823	8737	1191	2823	8737	1191	2823	8737
P17275	95	P17275	Transcription factor jun-B	JUNB	0.999301	33.333	7.75156e-15	84.249	71.447	84.249	1	S	LKLASSELERLIVPNSNGVITTTPTPPGQYF	X;X;X;X;X;X;X;X;X;X;X;X;X;X;X;GalT_UC1;X;X;X;X;X;X;X;X;X;X;X;X;X;X;X	XXXXXXXXXXPPPPPPPPPPPPPPPPPPPPP	LIVPNS(0.999)NGVITTTPTPPGQYFYPR	LIVPNS(33.33)NGVIT(-33.33)T(-36.44)T(-51.54)PT(-58.31)PPGQYFYPR	6	4	0.65493	3943600	3943600	0	0	NaN	110	91	95	95	277	341	546	1256;1257	546	1257	70828	546	1257	70828	546	1257	70828
P18146	120	P18146	Early growth response protein 1	EGR1	0.950764	12.8579	3.47002e-190	201.84	182.89	201.84	1	S	FPDISLNNEKVLVETSYPSQTTRLPPITYTG	X;X;X;X;X;X;X;X;X;X;X;X;X;X;X;GalT_UC1;X;X;X;X;X;X;X;X;X;X;X;X;X;X;X	XXXXXXXXXXPPPPPPPPPPPPPXXXXXXXX	VLVET(0.049)S(0.951)YPSQTTR	VLVET(-12.86)S(12.86)YPS(-71.84)QT(-102.95)T(-112.58)R	6	3	-0.057603	219440000	219440000	0	0	NaN	111	92	120	120	670	835	1308	3092;3093;3094;3095;3096;3097;3098;3099	1308	3093	18137	1308	3093	18137	1308	3093	18137
P18583	244	P18583	Protein SON	SON	0.966079	17.8743	0.000594563	50.608	31.55	50.608	1	S	SVAVMPEPSMTKILDSFAAAPVPTTTLVLKS	X;X;X;X;X;X;X;X;X;X;X;X;X;X;X;GalT_UC1;X;X;X;X;X;X;X;X;X;X;X;X;X;X;X	XXXXXXXXXXXXPPPPPPPPPPPPPPPPPPX	ILDS(0.966)FAAAPVPT(0.016)T(0.016)T(0.002)LVLK	ILDS(17.87)FAAAPVPT(-17.87)T(-17.87)T(-26.05)LVLK	4	3	0.62726	0	0	0	0	0	112	93	244	244	218	265;266	423	1015	423	1015	77787	423	1015	77787	423	1015	77787
P18583	252	P18583	Protein SON	SON	0.957638	10.532	1.57729e-68	139.3	112.51	139.3	2	T	SMTKILDSFAAAPVPTTTLVLKSSEPVVTMS	X;X;X;X;X;X;X;X;X;X;X;X;X;X;X;GalT_UC1;GalT_UC1;GalT_UC1;X;X;X;X;X;X;X;X;X;X;GalT_UC1;X;X	XXXXPPPPPPPPPPPPPPPPPPXXXXXXXXX	ILDSFAAAPVPT(0.958)T(0.521)T(0.521)LVLK	ILDS(-69.57)FAAAPVPT(10.53)T(0)T(0)LVLK	12	4	-0.38246	38686000	0	38686000	0	1.4856	652	93	252	252	218	265;266	414;415	977;978	414	977	59345	414	977	59345	414	977	59345
P18583	253	P18583	Protein SON	SON	0.873102	11.1503	7.45836e-158	184.21	164.12	184.21	1;2	T	MTKILDSFAAAPVPTTTLVLKSSEPVVTMSV	X;X;X;X;X;X;X;X;X;X;X;X;X;X;GalT_UC1;GalT_UC1;X;X;X;X;X;X;X;X;X;X;X;GalT_UC1;X;X;X	XXXPPPPPPPPPPPPPPPPPPXXXXXXXXXX	ILDSFAAAPVPT(0.067)T(0.873)T(0.06)LVLK	ILDS(-94.59)FAAAPVPT(-11.15)T(11.15)T(-11.64)LVLK	13	3	0.35815	871920000	833230000	38686000	0	33.482	653	93	253	253	218	265;266	414;415;418;421	977;978;983;984;985;986;987;988;989;990;991;992;993;994;995;996;997;998;999;1000;1001;1002;1003;1004;1005;1006;1007;1008;1013	418	987	74233	418	987	74233	418	987	74233
P18583	254	P18583	Protein SON	SON	0.934318	11.8683	1.08686e-69	142.1	129.42	142.1	1;2	T	TKILDSFAAAPVPTTTLVLKSSEPVVTMSVE	X;X;X;X;X;X;X;X;X;X;X;X;X;GalT_UC1;X;GalT_UC1;X;X;X;X;X;X;X;X;X;X;GalT_UC1;X;X;X;X	XXPPPPPPPPPPPPPPPPPPXXXXXXXXXXX	ILDSFAAAPVPT(0.005)T(0.061)T(0.934)LVLK	ILDS(-101.02)FAAAPVPT(-22.79)T(-11.87)T(11.87)LVLK	14	3	0.11016	109320000	70638000	38686000	0	4.1981	654	93	254	254	218	265;266	414;415;416;419	977;978;979;980;981;1009;1010;1011	416	979	71816	416	979	71816	416	979	71816
P18846	183	P18846	Cyclic AMP-dependent transcription factor ATF-1	ATF1	0.882961	9.99545	2.40393e-31	107.45	90.374	107.45	1	T	VVQTASGDMQTYQIRTTPSATSLPQTVVMTS	X;X;X;X;X;X;X;X;X;X;X;X;X;X;X;GalT_UC1;X;X;X;X;X;X;X;X;X;X;X;X;X;X;X	XXXXXXXXXXXXXXXPPPPPPPPPPPPPPPP	T(0.883)T(0.088)PS(0.01)AT(0.01)S(0.01)LPQTVVMTSPVTLTSQTTK	T(10)T(-10)PS(-19.68)AT(-19.68)S(-19.68)LPQT(-38.05)VVMT(-77.15)S(-83.54)PVT(-98.52)LT(-99.83)S(-103.93)QT(-104.69)T(-104.69)K	1	3	-0.38803	39540000	39540000	0	0	NaN	656	94	183	183	628	782	1237	2914;2915	1237	2915	65320	1237	2915	65320	1237	2915	65320
P20810	404	P20810	Calpastatin	CAST	1	50.1161	0.012175	50.116	20.817	50.116	1	S	TEKTEESKAAAPAPVSEAVCRTSMCSIQSAP	X;X;X;X;X;X;X;X;X;X;X;X;X;X;X;GalT_UC1;X;X;X;X;X;X;X;X;X;X;X;X;X;X;X	XXXXXXXXPPPPPPPPPPPPPXXXXXXXXXX	AAAPAPVS(1)EAVCR	AAAPAPVS(50.12)EAVCR	8	3	0.010328	12684000	12684000	0	0	NaN	114	95	404	404	0	0	0	0	0	0	12450	0	0	12450	0	0	12450
P22670	244	P22670	MHC class II regulatory factor RFX1	RFX1	0.999998	56.365	1.92386e-202	188.38	171.87	188.38	1	T	PQQLQVHGVQQSVPVTQERSVVQATPQAPKP	X;X;X;X;X;X;X;X;X;X;X;X;X;X;X;GalT_UC1;X;X;X;X;X;X;X;X;X;X;X;X;X;X;X	PPPPPPPPPPPPPPPPPPPXXXXXXXXXXXX	TAGAPTGTVPQQLQVHGVQQSVPVT(1)QER	T(-159.76)AGAPT(-140.83)GT(-118.02)VPQQLQVHGVQQS(-56.37)VPVT(56.37)QER	25	4	-0.13416	53249000	53249000	0	0	NaN	658	97	244	244	546	679	1085	2517;2518	1085	2518	39647	1085	2518	39647	1085	2518	39647
P23769	196	P23769	Endothelial transcription factor GATA-2	GATA2	0.864589	9.73262	8.66029e-26	78.71	66.63	78.71		S	VSPDPSTTGAASPASSSAGGSAARGEDKDGV	X;X;X;X;X;X;X;X;X;X;X;X;X;X;X;GalT_UC1;X;X;X;X;X;X;X;X;X;X;X;X;X;X;X	PPPPPPPPPPPPPPPPPPPPPPPPXXXXXXX	EVS(0.001)PDPSTTGAAS(0.002)PAS(0.092)S(0.865)S(0.041)AGGSAAR	EVS(-31.62)PDPS(-46.23)T(-46.23)T(-46.23)GAAS(-26.25)PAS(-9.73)S(9.73)S(-13.29)AGGS(-36)AAR	17	3	-0.45388	6145300	6145300	0	0	NaN	115	99	196	196	122	150	241	597	241	597	13484	241	597	13484	241	597	13484
P27540	629	P27540	Aryl hydrocarbon receptor nuclear translocator	ARNT	0.931587	17.1944	0.000824722	40.179	25.565	40.179	1	S	PSASAGQMLAQISRHSNPTQGATPTWTPTTR	X;X;X;X;X;X;X;X;X;X;X;X;X;X;X;GalT_UC1;X;X;X;X;X;X;X;X;X;X;X;X;X;X;X	XXXXXXXXXXXXXXPPPPPPPPPPPPPPPPP	HS(0.932)NPT(0.016)QGAT(0.018)PT(0.018)WT(0.005)PT(0.005)T(0.005)R	HS(17.19)NPT(-17.53)QGAT(-17.19)PT(-17.19)WT(-22.32)PT(-22.32)T(-22.32)R	2	3	0.64839	96188000	96188000	0	0	NaN	116	100	629	629	195	238	375	888	375	888	14598	375	888	14598	375	888	14598
P27816	797	P27816	Microtubule-associated protein 4	MAP4	1	86.9492	8.30324e-103	167.73	131.21	167.73	1	S	PEKRASPSKPASAPASRSGSKSTQTVAKTTT	X;X;X;X;X;X;X;X;X;X;X;X;X;X;X;GalT_UC1;X;X;X;X;X;X;GalT_UC1;X;X;X;X;X;X;X;X	XXXXPPPPPPPPPPPPPXXXXXXXXXXXXXX	ASPSKPASAPAS(1)R	AS(-135.11)PS(-137.26)KPAS(-86.95)APAS(86.95)R	12	3	0.4157	1839100000	1839100000	0	0	23.375	117	101	797	797	47;354	61;432	105;106;107;108;109;110;111;112;113;676	307;308;309;310;311;312;313;314;315;316;317;318;319;320;321;322;323;324;325;326;327;328;329;330;331;332;333;334;335;336;337;338;339;340;341;342;343;344;345;346;347;1505;1506;1507	105	307	3697	105	307	3697	105	307	3697
P28356	172	P28356	Homeobox protein Hox-D9	HOXD9	0.999999	60.4212	0	228.84	211.56	228.84	1	T	HYGIKPETRAAPAPATAASTTSSSSTSLSSS	X;X;X;X;X;X;X;X;X;X;X;X;X;X;X;GalT_UC1;X;X;X;X;X;X;X;X;X;X;X;X;X;X;X	XXXXXXXXXPPPPPPPPPPPPPPPPPPPPPP	AAPAPAT(1)AASTTSSSSTSLSSSSK	AAPAPAT(60.42)AAS(-60.42)T(-87.94)T(-113.58)S(-137.22)S(-149.19)S(-168.63)S(-184.83)T(-184.83)S(-197.73)LS(-205.51)S(-211.26)S(-220)S(-220)K	7	3	0.44633	89914000	89914000	0	0	NaN	662	102	172	172	4	5	6	14;15;16	6	15	10409	6	15	10409	6	15	10409
P30622	143	P30622	CAP-Gly domain-containing linker protein 1	CLIP1	0.999526	33.628	3.78259e-251	196.11	166.22	196.11		S	VQAEDEANGLQTTPASRATSPLCTSTASMVS	X;X;X;X;X;X;X;X;X;X;X;X;X;X;X;GalT_UC1;X;X;X;X;X;X;X;X;X;X;X;X;X;X;X	PPPPPPPPPPPPPPPPPXXXXXXXXXXXXXX	KVQAEDEANGLQTTPAS(1)R	KVQAEDEANGLQT(-43.95)T(-33.63)PAS(33.63)R	17	3	0.33792	93109000	93109000	0	0	NaN	119	104	143	143	258;690	320;856	519;1338	1187;3166	519	1187	9128	519	1187	9128	519	1187	9128
P30939	238	P30939	5-hydroxytryptamine receptor 1F	HTR1F	0.842277	8.52492	0.00038681	50.079	38.288	50.079	1	T	EEVNGQVLLESGEKSTKSVSTSYVLEKSLSD	X;X;X;X;X;X;X;X;X;X;X;X;X;X;X;GalT_UC1;X;X;X;X;X;X;X;X;X;X;X;X;X;X;X	XXXXXXXXXXXXXXPPPPPPPPPPPPPPPPP	S(0.118)T(0.842)KS(0.018)VS(0.018)T(0.003)S(0.001)YVLEKSLSDPSTDFDK	S(-8.52)T(8.52)KS(-16.77)VS(-16.77)T(-24.25)S(-31.04)YVLEKS(-42.13)LS(-42.13)DPS(-42.13)T(-46.13)DFDK	2	4	0.46005	78120000	78120000	0	0	NaN	664	105	238	238	524	648	996	2275	996	2275	40668	996	2275	40668	996	2275	40668
P31629	392	P31629	Transcription factor HIVEP2	HIVEP2	0.999644	34.4869	3.6706e-157	180.09	146.29	180.09	1	S	KGQDSEPSLNLLSPHSKGSTDSGYFSRSESA	X;X;X;X;X;X;X;X;X;X;X;X;X;X;X;GalT_UC1;X;X;X;X;X;X;X;X;X;X;X;X;X;X;X	PPPPPPPPPPPPPPPPPXXXXXXXXXXXXXX	KGQDSEPSLNLLSPHS(1)K	KGQDS(-143.49)EPS(-104.32)LNLLS(-34.49)PHS(34.49)K	16	4	-0.29192	10786000	10786000	0	0	NaN	121	106	392	392	244	299	481	1122;1123	481	1123	16982	481	1123	16982	481	1123	16982
P31629	549	P31629	Transcription factor HIVEP2	HIVEP2	0.759386	9.9165	1.80358e-99	154.72	144.92	154.72	1	S	PVDSSPLIRSNSVPTSSATNLTIPPSLRGSH	X;X;X;X;X;X;X;X;X;X;X;X;X;X;X;GalT_UC1;X;X;X;X;X;X;X;X;X;X;X;X;X;X;X	XXXXXXXXXPPPPPPPPPPPPPPPPPPPXXX	S(0.077)NS(0.077)VPT(0.077)S(0.759)S(0.008)ATNLTIPPSLR	S(-9.92)NS(-9.92)VPT(-9.92)S(9.92)S(-19.58)AT(-47.03)NLT(-107.85)IPPS(-136.4)LR	7	3	-0.15854	26455000	26455000	0	0	NaN	123	106	549	549	478	585	900	2046;2047;2048;2049;2050;2051;2052;2053;2054;2055	900	2051	45237	900	2051	45237	900	2051	45237
P31629	924	P31629	Transcription factor HIVEP2	HIVEP2	0.993797	22.2362	0.000366815	70.977	46.042	70.977	1	S	KEPEKPVEEFQWPQRSETLSQLPAEKLPPKK	X;X;X;X;X;X;X;X;X;X;X;X;X;X;X;GalT_UC1;X;X;X;X;X;X;X;X;X;X;X;X;X;X;X	XXXXXXXXXXXXXXXPPPPPPPPPPPXXXXX	S(0.994)ET(0.006)LSQLPAEK	S(22.24)ET(-22.24)LS(-35.75)QLPAEK	1	3	0.58303	5948200	5948200	0	0	NaN	122	106	924	924	444	545	838	1890	838	1890	13791	838	1890	13791	838	1890	13791
P31629	1274	P31629	Transcription factor HIVEP2	HIVEP2	1	64.8363	4.72486e-05	88.948	68.171	64.836	1	T	HVAEHTGKKPAEYAHTKEQTYPCYSGASGLH	X;X;X;X;X;X;X;X;X;X;X;X;X;X;X;GalT_UC1;X;X;X;X;X;X;X;X;X;X;X;X;X;X;X	XXXXXXXXPPPPPPPPPXXXXXXXXXXXXXX	KPAEYAHT(1)K	KPAEYAHT(64.84)K	8	2	-0.33456	6604600	6604600	0	0	NaN	665	106	1274	1274	249	306	492;493	1145;1146;1147	493	1147	588	492	1146	652	492	1146	652
P31629	2157	P31629	Transcription factor HIVEP2	HIVEP2	1	55.2279	6.94125e-05	55.228	42.289	55.228	1	S	RAPSPRRALYHNPPLSMGQYLQAEPIVLGPP	X;X;X;X;X;X;X;X;X;X;X;X;X;X;X;GalT_UC1;X;X;X;X;X;X;X;X;X;X;X;X;X;X;X	XXXXXXXPPPPPPPPPPPPPPPPPPPPPPPP	ALYHNPPLS(1)MGQYLQAEPIVLGPPNLR	ALYHNPPLS(55.23)MGQYLQAEPIVLGPPNLR	9	4	-0.45555	9615000	9615000	0	0	NaN	120	106	2157	2157	22	24	36	97	36	97	80900	36	97	80900	36	97	80900
P35658	526	P35658	Nuclear pore complex protein Nup214	NUP214	0.999997	55.6629	7.21327e-46	124.1	108.72	124.1	1	S	AAPGPGPSTFSFVPPSKASLAPTPAASPVAP	X;X;X;X;X;X;X;X;X;X;X;X;X;X;X;GalT_UC1;X;X;X;X;X;X;X;X;X;X;X;X;X;X;X	PPPPPPPPPPPPPPPPPXXXXXXXXXXXXXX	AAPGPGPSTFSFVPPS(1)K	AAPGPGPS(-103.74)T(-88.77)FS(-55.66)FVPPS(55.66)K	16	3	-0.099671	28505000	28505000	0	0	NaN	125	108	526	526	5	6	7	17;18	7	17	42844	7	17	42844	7	17	42844
P35658	598	P35658	Nuclear pore complex protein Nup214	NUP214	0.861243	9.10989	7.30974e-42	113.17	97.778	113.17	1;2	T	VKVNLSEKFTAAATSTPVSSSQSAPPMSPFS	X;X;X;X;X;X;X;X;X;X;X;X;X;GalT_UC1;X;GalT_UC1;X;X;X;X;X;X;X;X;X;X;X;X;X;X;X	XXXXXXXXPPPPPPPPPPPPPPPPPPPPPPP	FT(0.002)AAAT(0.002)S(0.014)T(0.861)PVS(0.106)S(0.015)SQSAPPMSPFSSASK	FT(-26.54)AAAT(-26.54)S(-17.96)T(9.11)PVS(-9.11)S(-17.54)S(-34.84)QS(-64.98)APPMS(-86.93)PFS(-92.72)S(-97.92)AS(-97.92)K	8	3	-0.0071563	191050000	182130000	8920000	0	NaN	673	108	598	598	142	175;176	283;284	699;700;701	284	701	46064	284	701	46064	284	701	46064
P35658	601	P35658	Nuclear pore complex protein Nup214	NUP214	0.93314	11.8656	3.9187e-202	192.69	175.89	192.69	2	S	NLSEKFTAAATSTPVSSSQSAPPMSPFSSAS	X;X;X;X;X;X;X;X;X;X;X;X;X;X;X;GalT_UC1;GalT_UC1;X;X;X;X;X;X;X;X;X;X;X;X;X;X	XXXXXPPPPPPPPPPPPPPPPPPPPPPPPPP	FTAAATS(0.002)T(0.063)PVS(0.933)S(0.937)S(0.065)QSAPPMSPFSSASK	FT(-70.17)AAAT(-34.9)S(-30.36)T(-11.87)PVS(11.87)S(11.87)S(-11.87)QS(-34.9)APPMS(-99.72)PFS(-119.87)S(-119.87)AS(-119.87)K	11	4	0.13064	132110000	0	132110000	0	NaN	133	108	601	601	142	175;176	281;282	694;695;696;697;698	281	695	34820	281	695	34820	281	695	34820
P35658	602	P35658	Nuclear pore complex protein Nup214	NUP214	0.936986	11.8656	3.9187e-202	192.69	175.89	192.69	2	S	LSEKFTAAATSTPVSSSQSAPPMSPFSSASK	X;X;X;X;X;X;X;X;X;X;X;X;X;X;GalT_UC1;GalT_UC1;X;X;X;X;X;X;X;X;X;X;X;X;X;X;X	XXXXPPPPPPPPPPPPPPPPPPPPPPPPPPP	FTAAATS(0.002)T(0.063)PVS(0.933)S(0.937)S(0.065)QSAPPMSPFSSASK	FT(-70.17)AAAT(-34.9)S(-30.36)T(-11.87)PVS(11.87)S(11.87)S(-11.87)QS(-34.9)APPMS(-99.72)PFS(-119.87)S(-119.87)AS(-119.87)K	12	4	0.13064	132110000	0	132110000	0	NaN	134	108	602	602	142	175;176	281;282	694;695;696;697;698	281	695	34820	281	695	34820	281	695	34820
P35658	636	P35658	Nuclear pore complex protein Nup214	NUP214	0.914368	10.2856	2.00129e-78	138.55	120.85	138.55	1	S	SGPLSHPTPLSAPPSSVPLKSSVLPSPSGRS	X;X;X;X;X;X;X;X;X;X;X;X;X;X;X;GalT_UC1;X;X;X;X;X;X;X;X;X;X;X;X;X;X;X	PPPPPPPPPPPPPPPPPPPPXXXXXXXXXXX	PAASGPLSHPTPLSAPPS(0.086)S(0.914)VPLK	PAAS(-101.62)GPLS(-81.83)HPT(-50.87)PLS(-50.87)APPS(-10.29)S(10.29)VPLK	19	4	-0.5818	48701000	48701000	0	0	NaN	144	108	636	636	348	426	667	1482;1483;1484;1485;1486;1487;1488;1489	667	1485	38938	667	1485	38938	667	1485	38938
P35658	1055	P35658	Nuclear pore complex protein Nup214	NUP214	0.953865	13.179	6.66407e-243	211.67	194.34	211.67	1	T	LVHGSSPGVMGTSVATSASKIIPQGADSTML	X;X;X;X;X;X;X;X;X;X;X;X;X;X;X;GalT_UC1;X;X;X;X;X;X;X;X;X;X;X;X;X;X;X	PPPPPPPPPPPPPPPPPPPPXXXXXXXXXXX	SHLVHGSSPGVMGTSVAT(0.954)S(0.046)ASK	S(-148.63)HLVHGS(-127.94)S(-137.78)PGVMGT(-62.98)S(-38.67)VAT(13.18)S(-13.18)AS(-38.67)K	18	4	0.23336	38874000	38874000	0	0	NaN	683	108	1055	1055	450	554	857	1945;1946;1947	857	1946	10659	857	1946	10659	857	1946	10659
P35658	1056	P35658	Nuclear pore complex protein Nup214	NUP214	0.944641	12.8302	0	235.71	207.39	235.71	1	S	VHGSSPGVMGTSVATSASKIIPQGADSTMLA	X;X;X;X;X;X;X;X;X;X;X;X;X;X;X;GalT_UC1;X;X;X;X;X;X;X;X;X;X;X;X;X;X;X	PPPPPPPPPPPPPPPPPPPXXXXXXXXXXXX	SHLVHGSSPGVMGTSVAT(0.049)S(0.945)AS(0.006)K	S(-182.18)HLVHGS(-141.07)S(-141.07)PGVMGT(-72.95)S(-63.45)VAT(-12.83)S(12.83)AS(-21.88)K	19	4	0.17867	288960000	288960000	0	0	NaN	149	108	1056	1056	450	554	855;856	1937;1938;1939;1940;1941;1942;1943;1944	855	1938	10043	855	1938	10043	855	1938	10043
P35658	1058	P35658	Nuclear pore complex protein Nup214	NUP214	0.983364	17.8059	5.51262e-146	172.26	172.26	172.26	1	S	GSSPGVMGTSVATSASKIIPQGADSTMLATK	X;X;X;X;X;X;X;X;X;X;X;X;X;X;X;GalT_UC1;X;X;X;X;X;X;X;X;X;X;X;X;X;X;X	PPPPPPPPPPPPPPPPPXXXXXXXXXXXXXX	SHLVHGSSPGVMGTSVATS(0.016)AS(0.983)K	S(-94.76)HLVHGS(-71.69)S(-79.63)PGVMGT(-61.23)S(-61.23)VAT(-34.65)S(-17.81)AS(17.81)K	21	5	0.18604	21354000	21354000	0	0	NaN	150	108	1058	1058	450	554	854	1933;1934;1935;1936	854	1934	10038	854	1934	10038	854	1934	10038
P35658	1087	P35658	Nuclear pore complex protein Nup214	NUP214	0.962062	17.0516	3.71553e-12	67.449	57.791	67.449	1	S	TKTVKHGAPSPSHPISAPQAAAAAALRRQMA	X;X;X;X;X;X;X;X;X;X;X;X;X;X;X;GalT_UC1;X;X;X;X;X;X;X;X;X;X;X;X;X;X;X	XXXXXPPPPPPPPPPPPPPPPPPPPPPXXXX	HGAPS(0.019)PS(0.019)HPIS(0.962)APQAAAAAALR	HGAPS(-17.05)PS(-17.05)HPIS(17.05)APQAAAAAALR	11	4	0.24404	24574000	24574000	0	0	NaN	135	108	1087	1087	186	228	361	850;851	361	850	19251	361	850	19251	361	850	19251
P35658	1137	P35658	Nuclear pore complex protein Nup214	NUP214	0.859077	10.8608	4.51706e-78	142.1	128.44	142.1	1;2	T	VVNVQELKNNPATPSTAMGSSVPYSTAKTPH	X;X;X;X;X;X;X;X;X;X;X;X;X;X;X;GalT_UC1;X;X;X;X;X;X;X;X;GalT_UC1;X;X;X;X;X;X	XXXXXXXXPPPPPPPPPPPPPPPPPPPPXXX	NNPAT(0.07)PS(0.07)T(0.859)AMGSSVPYSTAK	NNPAT(-10.86)PS(-10.86)T(10.86)AMGS(-69.65)S(-86.51)VPYS(-114.01)T(-126.25)AK	8	3	0.062252	42049000	35070000	6979800	0	NaN	676	108	1137	1137	334	409;410	636;637	1420;1421;1422	637	1422	25261	637	1422	25261	637	1422	25261
P35658	1146	P35658	Nuclear pore complex protein Nup214	NUP214	0.905735	9.82672	3.44223e-147	158.4	158.4	158.4		S	NPATPSTAMGSSVPYSTAKTPHPVLTPVAAN	X;X;X;X;X;X;GalT_UC1;X;X;X;X;X;X;X;X;GalT_UC1;X;X;X;X;X;X;X;X;X;X;X;X;X;X;X	PPPPPPPPPPPPPPPPPPPXXXXXXXXXXXX	NNPATPSTAMGSSVPYS(0.906)T(0.094)AK	NNPAT(-118.21)PS(-124.2)T(-111.86)AMGS(-74.26)S(-53.09)VPYS(9.83)T(-9.83)AK	17	3	0.053088	775730000	775730000	0	0	NaN	138	108	1146	1146	334	409;410	638	1423	638	1423	24223	638	1423	24223	638	1423	24223
P35658	1201	P35658	Nuclear pore complex protein Nup214	NUP214	0.971893	15.2638	3.78296e-259	215.53	191.45	154.74	1;2	T	SGDKASGTAKIETAVTSTPSASGQFSKPFSF	X;X;X;X;X;X;X;X;X;X;X;X;X;X;X;GalT_UC1;GalT_UC1;X;X;X;X;X;X;X;X;X;X;X;X;X;X	XXXXXXXXXXPPPPPPPPPPPPPPPPPXXXX	IET(0.056)AVT(0.972)S(0.971)T(0.001)PSASGQFSK	IET(-15.26)AVT(15.26)S(15.26)T(-28.23)PS(-62.1)AS(-79.98)GQFS(-111.36)K	6	4	-0.16428	1880900000	1074700000	806210000	0	NaN	675	108	1201	1201	205	250;251	390;391;392;393;394	917;918;919;920;921;922;923;924;925;926;927;928;929;930;931;932;933;934;935;936;937;938	390	919	15598	394	933	22041	394	933	22041
P35658	1202	P35658	Nuclear pore complex protein Nup214	NUP214	0.970503	15.2638	5.59573e-99	154.74	131.26	154.74	2	S	GDKASGTAKIETAVTSTPSASGQFSKPFSFS	X;X;X;X;X;X;X;X;X;X;X;GalT_UC1;X;X;GalT_UC1;GalT_UC1;X;X;X;X;X;X;X;X;X;X;X;X;X;X;X	XXXXXXXXXPPPPPPPPPPPPPPPPPXXXXX	IET(0.056)AVT(0.972)S(0.971)T(0.001)PSASGQFSK	IET(-15.26)AVT(15.26)S(15.26)T(-28.23)PS(-62.1)AS(-79.98)GQFS(-111.36)K	7	4	-0.16428	806210000	0	806210000	0	NaN	136	108	1202	1202	205	250;251	390;391	917;918;919;920;921	390	919	15598	390	919	15598	390	919	15598
P35658	1305	P35658	Nuclear pore complex protein Nup214	NUP214	0.945963	12.6831	2.26912e-149	179.81	157.28	179.81	1	T	ASSSRPVAPSGTALSTTSSKLETPPSKLGEL	X;X;X;X;X;X;X;X;X;X;X;X;X;X;X;GalT_UC1;X;X;X;X;X;X;X;X;X;X;X;X;X;X;X	XXXXXPPPPPPPPPPPPPPPXXXXXXXXXXX	PVAPSGTALS(0.051)T(0.946)T(0.003)SSK	PVAPS(-95.64)GT(-68.83)ALS(-12.68)T(12.68)T(-24.96)S(-48.29)S(-56.06)K	11	3	-0.063941	110240000	110240000	0	0	NaN	682	108	1305	1305	389	475	735	1662;1663;1664;1665	735	1663	11373	735	1663	11373	735	1663	11373
P35658	1325	P35658	Nuclear pore complex protein Nup214	NUP214	0.996502	24.5467	0	326.89	296.98	326.89	1	S	LETPPSKLGELLFPSSLAGETLGSFSGLRVG	X;X;X;X;X;X;X;X;X;X;X;X;X;X;X;GalT_UC1;X;X;X;X;X;X;X;X;X;X;X;X;X;X;X	XXXXXXXPPPPPPPPPPPPPPPPPPPPPPXX	LGELLFPS(0.003)S(0.997)LAGETLGSFSGLR	LGELLFPS(-24.55)S(24.55)LAGET(-113.16)LGS(-164.13)FS(-182.49)GLR	9	3	0.093897	45985000	45985000	0	0	NaN	137	108	1325	1325	272	335	538	1223;1224;1225;1226;1227;1228;1229;1230	538	1224	95094	538	1224	95094	538	1224	95094
P35658	1353	P35658	Nuclear pore complex protein Nup214	NUP214	0.930154	11.5638	7.08864e-70	145.46	120.07	145.46	1	S	RVGQADDSTKPTNKASSTSLTSTQPTKTSGV	X;X;X;X;X;X;X;X;X;X;X;X;X;X;X;GalT_UC1;X;X;X;X;X;X;X;X;X;X;X;X;X;X;X	XXXXXXXXXXXXXXPPPPPPPPPPPPPXXXX	AS(0.93)S(0.065)T(0.005)SLTSTQPTK	AS(11.56)S(-11.56)T(-22.77)S(-44.06)LT(-90.42)S(-104.76)T(-116.03)QPT(-129.19)K	2	3	0.12664	368230000	368230000	0	0	NaN	126	108	1353	1353	52	69	124	361;362;363	124	362	7188	124	362	7188	124	362	7188
P35658	1549	P35658	Nuclear pore complex protein Nup214	NUP214	0.896267	9.44516	0	272.91	254.03	223.64	1	S	SDSVKKEPVLAQPAVSNSGTAASSTSLVALS	X;X;X;X;X;X;X;X;X;X;X;X;X;X;X;GalT_UC1;X;X;X;X;X;X;X;X;X;X;X;X;X;X;X	XXXXXPPPPPPPPPPPPPPPPPPPPPPPPPP	KEPVLAQPAVS(0.896)NS(0.102)GT(0.002)AASSTSLVALSAEATPATTGVPDAR	KEPVLAQPAVS(9.45)NS(-9.45)GT(-27.09)AAS(-44.1)S(-44.1)T(-44.1)S(-44.1)LVALS(-79.72)AEAT(-146.11)PAT(-164.75)T(-181.34)GVPDAR	11	4	0.076011	248650000	248650000	0	0	NaN	127	108	1549	1549	112;241	140;296	475	1109;1110	475	1110	63752	476	1112	63795	476	1112	63795
P35658	1904	P35658	Nuclear pore complex protein Nup214	NUP214	0.98394	17.3659	0	228.01	212.07	129.02	1;2;3	S	LGGKPSQDAANKNPFSSASGGFGSTATSNTS	X;X;X;X;X;X;X;X;X;X;X;X;X;X;X;GalT_UC1;GalT_UC1;X;X;X;X;X;X;GalT_UC1;X;X;GalT_UC1;X;X;X;X	XXXXPPPPPPPPPPPPPPPPPPPPPPPPPPP	NPFS(0.984)S(0.885)AS(0.131)GGFGSTATSNTSNLFGNSGAK	NPFS(17.37)S(8.79)AS(-8.79)GGFGS(-33.83)T(-49.33)AT(-56.71)S(-63.82)NT(-87.26)S(-94.31)NLFGNS(-123.7)GAK	4	4	0.041988	717840000	451200000	248570000	18073000	NaN	139	108	1904	1904	335;382	411;412;413;467	639;640;641;642;643;644;723	1424;1425;1426;1427;1428;1429;1430;1431;1432;1433;1434;1435;1637;1638	641	1428	40452	643	1433	41061	643	1433	41061
P35658	1905	P35658	Nuclear pore complex protein Nup214	NUP214	0.884837	8.79273	1.40836e-68	129.02	120.68	129.02	2;3	S	GGKPSQDAANKNPFSSASGGFGSTATSNTSN	X;X;X;X;X;X;X;X;X;X;X;X;X;X;GalT_UC1;GalT_UC1;X;X;X;X;X;X;X;X;X;GalT_UC1;X;X;X;X;X	XXXXXXXXXXXPPPPPPPPPPPPPPPPPPPP	NPFS(0.984)S(0.885)AS(0.131)GGFGSTATSNTSNLFGNSGAK	NPFS(17.37)S(8.79)AS(-8.79)GGFGS(-33.83)T(-49.33)AT(-56.71)S(-63.82)NT(-87.26)S(-94.31)NLFGNS(-123.7)GAK	5	4	0.041988	89166000	0	71093000	18073000	NaN	140	108	1905	1905	335;382	411;412;413;467	639;641	1424;1427;1428	641	1428	40452	641	1428	40452	641	1428	40452
P35658	1907	P35658	Nuclear pore complex protein Nup214	NUP214	0.99082	20.3783	0	248.46	248.46	248.46	1	S	KPSQDAANKNPFSSASGGFGSTATSNTSNLF	X;X;X;X;X;X;X;X;X;X;X;X;X;X;X;GalT_UC1;X;X;X;X;X;X;X;X;X;X;X;X;X;X;X	XXXXXXXXXPPPPPPPPPPPPPPPPPPPPPP	NPFSS(0.009)AS(0.991)GGFGSTATSNTSNLFGNSGAK	NPFS(-40.09)S(-20.38)AS(20.38)GGFGS(-59.12)T(-68.38)AT(-68.38)S(-77.46)NT(-95.09)S(-111.99)NLFGNS(-179.64)GAK	7	3	0.024801	187990000	187990000	0	0	NaN	141	108	1907	1907	335;382	411;412;413;467	645	1436;1437	645	1437	52007	645	1437	52007	645	1437	52007
P35658	1912	P35658	Nuclear pore complex protein Nup214	NUP214	0.9918	21.3154	0	228.01	212.07	228.01	2	S	AANKNPFSSASGGFGSTATSNTSNLFGNSGA	X;X;X;X;X;X;X;GalT_UC1;X;X;X;X;X;X;X;GalT_UC1;X;X;X;X;X;X;X;X;X;X;X;X;X;X;X	XXXXPPPPPPPPPPPPPPPPPPPPPPPPPPP	NPFS(0.922)S(0.078)AS(0.001)GGFGS(0.992)T(0.001)AT(0.007)SNTSNLFGNSGAK	NPFS(10.75)S(-10.75)AS(-31.7)GGFGS(21.32)T(-31.7)AT(-21.32)S(-41.9)NT(-71.34)S(-86.46)NLFGNS(-182.92)GAK	12	4	0.014906	117250000	0	117250000	0	NaN	142	108	1912	1912	335;382	411;412;413;467	643	1432;1433	643	1433	41061	643	1433	41061	643	1433	41061
P35968	1231	P35968	Vascular endothelial growth factor receptor 2	KDR	1	45.3592	0.018162	45.359	10.747	45.359	2	S	NTAGISQYLQNSKRKSRPVSVKTFEDIPLEE	X;X;X;X;X;X;X;X;X;X;X;X;X;X;X;GalT_UC1;X;X;X;GalT_UC1;X;X;X;X;X;X;X;X;X;X;X	XXXXXXXXXXXXXXXPPPPPPPXXXXXXXXX	S(1)RPVS(1)VK	S(45.36)RPVS(45.36)VK	1	3	-2.7616	0	0	0	0	NaN	154	109	1231	1231	499	612	937	2146	937	2146	68491	937	2146	68491	937	2146	68491
P35968	1235	P35968	Vascular endothelial growth factor receptor 2	KDR	1	45.3592	0.018162	45.359	10.747	45.359	2	S	ISQYLQNSKRKSRPVSVKTFEDIPLEEPEVK	X;X;X;X;X;X;X;X;X;X;X;GalT_UC1;X;X;X;GalT_UC1;X;X;X;X;X;X;X;X;X;X;X;X;X;X;X	XXXXXXXXXXXPPPPPPPXXXXXXXXXXXXX	S(1)RPVS(1)VK	S(45.36)RPVS(45.36)VK	5	3	-2.7616	0	0	0	0	NaN	155	109	1235	1235	499	612	937	2146	937	2146	68491	937	2146	68491	937	2146	68491
P39880	734	P39880	Homeobox protein cut-like 1	CUX1	0.999705	35.3008	3.33789e-91	153.25	134.88	153.25	1	S	AQQAALDPALKQAPLSQSDITILTPKLLSTS	X;X;X;X;X;X;X;X;X;X;X;X;X;X;X;GalT_UC1;X;X;X;X;X;X;X;X;X;X;X;X;X;X;X	XXXXXXXXXXXPPPPPPPPPPPPPPPXXXXX	QAPLS(1)QSDITILTPK	QAPLS(35.3)QS(-35.3)DIT(-78.47)ILT(-118.82)PK	5	3	0.10774	35594000	35594000	0	0	NaN	156	110	734	734	399	486	750	1696;1697;1698	750	1697	43323	750	1697	43323	750	1697	43323
P43243	22	P43243	Matrin-3	MATR3	0.998798	29.1961	9.08644e-179	185.33	166.87	185.33	1	S	QSSLSRDSQGHGRDLSAAGIGLLAAATQSLS	X;X;X;X;X;X;X;X;X;X;X;X;X;X;X;GalT_UC1;X;X;X;X;X;X;X;X;X;X;X;X;X;X;X	XXXXXXXXXXXXXPPPPPPPPPPPPPPPPPP	DLS(0.999)AAGIGLLAAAT(0.001)QSLSMPASLGR	DLS(29.2)AAGIGLLAAAT(-29.2)QS(-65.22)LS(-89.9)MPAS(-124.84)LGR	3	3	0.065561	34779000	34779000	0	0	NaN	157	112	22	22	81	104	169	439;440;441	169	440	97527	169	440	97527	169	440	97527
P46937	350	P46937	Transcriptional coactivator YAP1	YAP1	0.853397	7.7702	9.4529e-06	46.307	37.657	46.307	1	S	PSTANSPKCQELALRSQLPTLEQDGGTQNPV	X;X;X;X;X;X;X;X;X;X;X;X;X;X;X;GalT_UC1;X;X;X;X;X;X;X;X;X;X;X;X;X;X;X	XXXXXXXXXXXXXXXPPPPPPPPPPPPPPPP	S(0.853)QLPT(0.143)LEQDGGT(0.004)QNPVSSPGMSQELR	S(7.77)QLPT(-7.77)LEQDGGT(-23.42)QNPVS(-41.55)S(-43.87)PGMS(-46.07)QELR	1	3	-0.38359	11870000	11870000	0	0	NaN	158	113	350	350	490	599	919	2111	919	2111	50575	919	2111	50575	919	2111	50575
P46977	550	P46977	Dolichyl-diphosphooligosaccharide--protein glycosyltransferase subunit STT3A	STT3A	0.98934	19.7218	2.12187e-50	132.79	100.7	132.79	1	T	MANRTILVDNNTWNNTHISRVGQAMASTEEK	X;X;X;X;X;X;X;X;X;X;X;X;X;X;X;GalT_UC1;X;X;X;X;X;X;X;X;X;X;X;X;X;X;X	XXXXPPPPPPPPPPPPPPPPXXXXXXXXXXX	TILVDNNT(0.011)WNNT(0.989)HISR	T(-112.04)ILVDNNT(-19.72)WNNT(19.72)HIS(-39.44)R	12	4	0.05631	18345000	18345000	0	0	NaN	691	114	550	550	569	705	1119	2599;2600	1119	2600	31270	1119	2600	31270	1119	2600	31270
P48029	623	P48029	Sodium- and chloride-dependent creatine transporter 1	SLC6A8	0.965375	14.9646	3.98335e-06	79.23	60.653	79.23	1	S	AQDADVRGLTTLTPVSESSKVVVVESVM___	X;X;X;X;X;X;X;X;X;X;X;X;X;X;X;GalT_UC1;X;X;X;X;X;X;X;X;X;X;X;X;X;X;X	XXXXXXXPPPPPPPPPPPPPXXXXXXXXXXX	GLTTLT(0.031)PVS(0.965)ES(0.003)SK	GLT(-38.71)T(-38.71)LT(-14.96)PVS(14.96)ES(-24.46)S(-38.71)K	9	3	-0.38949	8483100	8483100	0	0	NaN	159	115	623	623	165	203	318	763;764	318	764	19083	318	764	19083	318	764	19083
P48382	439	P48382	DNA-binding protein RFX5	RFX5	0.874296	8.4231	1.40805e-117	168.61	140.28	168.61	1	S	GPHDKGVKRTAEVPVSEASGQAPPAKAAKQD	X;X;X;X;X;X;X;X;X;X;X;X;X;X;X;GalT_UC1;X;X;X;X;X;X;X;X;X;X;X;X;X;X;X	XXXXXXXXXPPPPPPPPPPPPPPPPPXXXXX	T(0.126)AEVPVS(0.874)EASGQAPPAK	T(-8.42)AEVPVS(8.42)EAS(-73.83)GQAPPAK	7	3	0.76198	53853000	53853000	0	0	4.5104	160	116	439	439	544	676	1077	2492;2493;2494;2495	1077	2493	13955	1077	2493	13955	1077	2493	13955
P48634	1796	P48634	Protein PRRC2A	PRRC2A	1	91.6674	3.65131e-149	180.97	148.5	180.97	1	S	AEKELTASVTEAIPVSRDWELLPSAAASAEP	X;X;X;X;X;X;X;X;X;X;X;X;X;X;X;GalT_UC1;X;X;X;X;X;X;X;X;X;X;X;X;X;X;X	XXXPPPPPPPPPPPPPPXXXXXXXXXXXXXX	ELTASVTEAIPVS(1)R	ELT(-123.18)AS(-108.24)VT(-91.67)EAIPVS(91.67)R	13	3	-0.10687	16094000	16094000	0	0	NaN	162	117	1796	1796	107	134	215	522;523;524	215	523	40940	215	523	40940	215	523	40940
P48723	185	P48723	Heat shock 70 kDa protein 13	HSPA13	0.999897	39.8575	6.22035e-216	204.5	169.49	204.5	1	S	AVISVPAEFDLKQRNSTIEAANLAGLKILRV	X;X;X;X;X;X;X;X;X;X;X;X;X;X;X;GalT_UC1;X;X;X;X;X;X;X;X;X;X;X;X;X;X;X	XXXXXXXXXXXXXXPPPPPPPPPPPPPXXXX	NS(1)TIEAANLAGLK	NS(39.86)T(-39.86)IEAANLAGLK	2	3	-0.30864	23264000	23264000	0	0	NaN	163	118	185	185	342	420	656;657	1461;1462;1463;1464	656	1462	27659	656	1462	27659	656	1462	27659
P49116	322	P49116	Nuclear receptor subfamily 2 group C member 2	NR2C2	0.874618	9.42699	1.75999e-39	93.764	88.314	93.764	1	T	SEITRAFDTLAKALNTTDSSSSPSLADGIDT	X;X;X;X;X;X;X;X;X;X;X;X;X;X;X;GalT_UC1;X;X;X;X;X;X;X;X;X;X;X;X;X;X;X	XXXXXXXXXXXXPPPPPPPPPPPPPPPPPPP	ALNT(0.875)T(0.1)DS(0.01)S(0.012)S(0.002)S(0.002)PSLADGIDTSGGGSIHVISR	ALNT(9.43)T(-9.43)DS(-19.29)S(-18.62)S(-27.56)S(-27.56)PS(-36.22)LADGIDT(-73.59)S(-73.31)GGGS(-89.14)IHVIS(-92.89)R	4	4	-0.25843	7999200	7999200	0	0	NaN	693	119	322	322	18	20	32	85;86	32	85	47817	32	85	47817	32	85	47817
P49336	411	P49336	Cyclin-dependent kinase 8	CDK8	0.929065	11.4866	1.04588e-231	208.68	182.96	208.68	1;2	T	TQGPPLKKVRVVPPTTTSGGLIMTSDYQRSN	X;X;X;X;X;X;X;X;X;X;X;X;X;X;X;GalT_UC1;GalT_UC1;X;X;X;X;X;X;X;X;X;X;X;X;X;X	XXXXXXXXXXPPPPPPPPPPPPPPPPPPPXX	VVPPT(0.066)T(0.929)T(0.005)SGGLIMTSDYQR	VVPPT(-11.49)T(11.49)T(-22.73)S(-54.97)GGLIMT(-142)S(-166.29)DYQR	6	3	0.32532	226560000	171070000	55491000	0	NaN	695	121	411	411	712	882;883	1369;1370	3244;3245;3246;3247;3248;3249;3250;3251;3252	1370	3246	42578	1370	3246	42578	1370	3246	42578
P49336	412	P49336	Cyclin-dependent kinase 8	CDK8	0.78946	6.63525	0.0171115	49.343	36.983	49.343	2	T	QGPPLKKVRVVPPTTTSGGLIMTSDYQRSNP	X;X;X;X;X;X;X;X;X;X;X;X;X;X;GalT_UC1;GalT_UC1;X;X;X;X;X;X;X;X;X;X;X;X;X;X;X	XXXXXXXXXPPPPPPPPPPPPPPPPPPPXXX	VVPPT(0.268)T(0.789)T(0.789)S(0.152)GGLIMT(0.001)SDYQR	VVPPT(-6.64)T(6.64)T(6.64)S(-9.26)GGLIMT(-34.88)S(-39.06)DYQR	7	4	0.44772	55491000	0	55491000	0	NaN	696	121	412	412	712	882;883	1369	3244	1369	3244	31897	1369	3244	31897	1369	3244	31897
P49750	478	P49750	YLP motif-containing protein 1	YLPM1	0.972405	15.4713	1.00082e-84	143.82	137.02	143.82	1	T	QSSQVPEKPRPALLPTPVSFGSAPPTTYHPP	X;X;X;X;X;X;X;X;X;X;X;X;X;X;X;GalT_UC1;X;X;X;X;X;X;X;X;X;X;X;X;X;X;X	XXXXXXXXXXPPPPPPPPPPPPPPPPPPPPP	PALLPT(0.972)PVS(0.028)FGSAPPTTYHPPLQSAGPSEQVNSK	PALLPT(15.47)PVS(-15.47)FGS(-51.88)APPT(-64.41)T(-64.41)YHPPLQS(-99.8)AGPS(-116.92)EQVNS(-120.85)K	6	4	0.24831	118490000	118490000	0	0	NaN	697	123	478	478	350	428	670	1493;1494	670	1493	67094	670	1493	67094	670	1493	67094
P49750	481	P49750	YLP motif-containing protein 1	YLPM1	0.794437	7.13526	4.71135e-53	100.55	95.54	57.142	1	S	QVPEKPRPALLPTPVSFGSAPPTTYHPPLQS	X;X;X;X;X;X;X;X;X;X;X;X;X;X;X;GalT_UC1;X;X;X;X;X;X;X;X;X;X;X;X;X;X;X	XXXXXXXPPPPPPPPPPPPPPPPPPPPPPPP	PALLPT(0.154)PVS(0.794)FGS(0.047)APPT(0.004)T(0.001)YHPPLQSAGPSEQVNSK	PALLPT(-7.14)PVS(7.14)FGS(-12.28)APPT(-23.35)T(-28.39)YHPPLQS(-41.38)AGPS(-46.04)EQVNS(-54.59)K	9	4	0.22617	30791000	30791000	0	0	NaN	166	123	481	481	350	428	671	1495	671	1495	69848	669	1491	67016	669	1491	67016
P49790	515	P49790	Nuclear pore complex protein Nup153	NUP153	0.999761	36.225	1.47673e-128	172.92	136.5	172.92	1	T	SPINSSQALTNKVQMTSPSSTGSPMFKFSSP	X;X;X;X;X;X;X;X;X;X;X;X;X;X;X;GalT_UC1;X;X;X;X;X;X;X;X;X;X;X;X;X;X;X	XXXXXXXXXXXXPPPPPPPPPPPPPPPXXXX	VQMT(1)SPSSTGSPMFK	VQMT(36.22)S(-36.22)PS(-68.68)S(-88.56)T(-111.71)GS(-133.92)PMFK	4	3	-0.14536	83170000	83170000	0	0	NaN	713	124	515	515	692	858	1341	3169;3170;3171;3172	1341	3170	25689	1341	3170	25689	1341	3170	25689
P49790	535	P49790	Nuclear pore complex protein Nup153	NUP153	0.923447	10.8313	0	249.13	233.74	206.43	1;2	T	TGSPMFKFSSPIVKSTEANVLPPSSIGFTFS	X;X;X;X;X;X;X;X;X;X;X;X;X;X;X;GalT_UC1;X;X;X;X;X;X;X;X;GalT_UC1;X;X;X;X;X;X	XXXXXXXXXXXXXXPPPPPPPPPPPPPPPPP	S(0.077)T(0.923)EANVLPPS(0.077)S(0.923)IGFTFSVPVAK	S(-10.83)T(10.83)EANVLPPS(-10.83)S(10.83)IGFT(-68.82)FS(-109.76)VPVAK	2	4	0.70603	361520000	104240000	257280000	0	NaN	710	124	535	535	518	639;640	979;980;981;982	2235;2236;2237;2238;2239;2240;2241;2242;2243;2244;2245;2246;2247;2248;2249;2250;2251;2252;2253;2254;2255;2256	982	2254	65029	979	2240	79378	979	2240	79378
P49790	544	P49790	Nuclear pore complex protein Nup153	NUP153	0.923446	10.8313	2.85453e-241	206.43	196.51	206.43	1;2	S	SPIVKSTEANVLPPSSIGFTFSVPVAKTAEL	X;X;X;X;X;X;GalT_UC1;X;X;X;X;X;X;X;X;GalT_UC1;X;X;X;X;X;X;X;X;X;X;X;GalT_UC1;X;X;X	XXXXXPPPPPPPPPPPPPPPPPPPPPPXXXX	S(0.077)T(0.923)EANVLPPS(0.077)S(0.923)IGFTFSVPVAK	S(-10.83)T(10.83)EANVLPPS(-10.83)S(10.83)IGFT(-68.82)FS(-109.76)VPVAK	11	4	0.70603	271100000	13824000	257280000	0	NaN	186	124	544	544	518	639;640	978;982	2234;2253;2254;2255;2256	982	2254	65029	982	2254	65029	982	2254	65029
P49790	556	P49790	Nuclear pore complex protein Nup153	NUP153	0.999996	53.7989	7.73208e-124	157.7	142.6	157.7	1	T	PPSSIGFTFSVPVAKTAELSGSSSTLEPIIS	X;X;X;GalT_UC1;X;X;X;X;X;X;X;X;X;X;X;GalT_UC1;X;X;X;X;X;X;X;X;X;X;X;X;X;X;X	XXXXXXXXXXXXXXXPPPPPPPPPPPPPPPP	T(1)AELSGSSSTLEPIISSSAHHVTTVNSTNCK	T(53.8)AELS(-53.8)GS(-68.86)S(-72.23)S(-89.47)T(-89.47)LEPIIS(-128.12)S(-128.12)S(-128.12)AHHVT(-152.37)T(-152.37)VNS(-146.83)T(-145.81)NCK	1	5	-0.87971	18603000	18603000	0	0	NaN	712	124	556	556	543	675	1076	2489;2490;2491	1076	2490	39735	1076	2490	39735	1076	2490	39735
P49790	624	P49790	Nuclear pore complex protein Nup153	NUP153	1	149.046	0	259.48	259.48	259.48	1;2	S	LDILKSPGFASPKIDSVAAQPTATSPVVYTR	X;X;X;X;X;X;X;X;X;X;X;X;X;X;X;GalT_UC1;X;X;X;X;X;X;X;GalT_UC1;X;X;X;X;X;X;X	XXXXXXXXXXXXXPPPPPPPPPPPPPPPPPP	IDS(1)VAAQPTATSPVVYTR	IDS(149.05)VAAQPT(-149.05)AT(-183.33)S(-204.63)PVVYT(-234.1)R	3	3	0.30319	163260000	129250000	34010000	0	3.0775	173	124	624	624	202;203	245;246;248	382;383;385	899;900;901;902;911	383	902	33057	383	902	33057	383	902	33057
P49790	632	P49790	Nuclear pore complex protein Nup153	NUP153	0.993844	22.4248	4.11034e-231	206.32	206.32	206.32	1;2	T	FASPKIDSVAAQPTATSPVVYTRPAISSFSS	X;X;X;X;X;X;X;GalT_UC1;X;X;X;X;X;X;X;GalT_UC1;X;X;X;X;X;X;X;X;X;X;X;X;X;X;X	XXXXXPPPPPPPPPPPPPPPPPPXXXXXXXX	IDSVAAQPTAT(0.994)S(0.006)PVVYTR	IDS(-74.01)VAAQPT(-33.26)AT(22.42)S(-22.42)PVVYT(-66.46)R	11	3	0.12106	805000000	770990000	34010000	0	15.175	704	124	632	632	202;203	245;246;248	382;384;386	899;900;903;904;905;906;907;908;909;910;912	384	904	33392	384	904	33392	384	904	33392
P49790	892	P49790	Nuclear pore complex protein Nup153	NUP153	0.949728	13.1839	0	259.48	253.24	259.48	1	S	AKPGTKSGFKGFDTSSSSSNSAASSSFKFGV	X;X;X;X;X;X;X;X;X;X;X;X;X;X;X;GalT_UC1;X;X;X;X;X;X;X;X;X;X;X;X;X;X;X	XXXXXXXXXXPPPPPPPPPPPPPPPPPPXXX	GFDT(0.002)S(0.046)S(0.95)S(0.002)SSNSAASSSFK	GFDT(-26.11)S(-13.18)S(13.18)S(-26.11)S(-63.37)S(-109.37)NS(-168.87)AAS(-214.2)S(-214.2)S(-229)FK	6	3	-0.14547	470530000	470530000	0	0	NaN	170	124	892	892	151	187	296	724;725	296	725	11787	296	725	11787	296	725	11787
P49790	908	P49790	Nuclear pore complex protein Nup153	NUP153	0.999837	37.8809	0	282.24	267.15	282.24	1;2	S	SSSNSAASSSFKFGVSSSSSGPSQTLTSTGN	X;X;X;X;X;X;X;X;X;X;X;X;X;X;X;GalT_UC1;GalT_UC1;X;X;X;X;X;X;X;GalT_UC1;X;GalT_UC1;X;X;X;X	XXXXXXXXXXXXPPPPPPPPPPPPPPPPPPP	FGVS(1)SSSSGPSQTLTSTGNFK	FGVS(37.88)S(-37.88)S(-62.04)S(-85.29)S(-129.01)GPS(-168.77)QT(-212.26)LT(-247.59)S(-258.95)T(-265.74)GNFK	4	3	0.10464	1575200000	1467800000	107470000	0	33.015	167	124	908	908	130	159;160	255;256;257;258;259	623;624;625;626;627;628;629;630;631;632;633;634;635;636;637;638;639;640;641;642;643;644;645;646;647;648;649	259	639	33570	259	639	33570	259	639	33570
P49790	909	P49790	Nuclear pore complex protein Nup153	NUP153	0.917947	14.1851	0.000174756	69.398	53.859	69.398	2	S	SSNSAASSSFKFGVSSSSSGPSQTLTSTGNF	X;X;X;X;X;X;X;X;X;X;X;X;X;X;GalT_UC1;GalT_UC1;X;X;X;X;X;X;X;X;X;X;X;X;X;X;X	XXXXXXXXXXXPPPPPPPPPPPPPPPPPPPP	FGVS(0.979)S(0.918)S(0.048)S(0.048)S(0.007)GPS(0.001)QTLTSTGNFK	FGVS(21.72)S(14.19)S(-14.19)S(-14.19)S(-23.08)GPS(-32.31)QT(-47.86)LT(-54.48)S(-59.02)T(-60.14)GNFK	5	3	0.64294	5988800	0	5988800	0	0.12552	168	124	909	909	130	159;160	255	623	255	623	24285	255	623	24285	255	623	24285
P49790	937	P49790	Nuclear pore complex protein Nup153	NUP153	0.999889	39.5508	0	272.92	254.3	272.92	1	S	GNFKFGDQGGFKIGVSSDSGSINPMSEGFKF	X;X;X;X;X;X;X;X;X;X;X;X;X;X;X;GalT_UC1;X;X;X;X;X;X;X;X;X;X;X;X;X;X;X	XXXXXXXXXXXXPPPPPPPPPPPPPPPPPPX	IGVS(1)SDSGSINPMSEGFK	IGVS(39.55)S(-39.55)DS(-88.71)GS(-144.16)INPMS(-230.66)EGFK	4	3	0.13992	170090000	170090000	0	0	NaN	175	124	937	937	212	258	405	954;955;956;957;958;959;960;961	405	957	41848	405	957	41848	405	957	41848
P49790	1017	P49790	Nuclear pore complex protein Nup153	NUP153	0.980295	19.6428	0	329.79	306.5	243.41	2	S	VSNLGQEEKKEELPKSSSAGFSFGTGVINST	X;X;X;X;X;X;X;X;X;X;X;X;X;X;X;GalT_UC1;GalT_UC1;X;X;X;X;X;X;X;X;X;X;X;X;X;X	XXXXXXXXXXXXXXXPPPPPPPPPPPPPPPP	S(0.98)S(0.829)S(0.091)AGFS(0.09)FGT(0.01)GVINSTPAPANTIVTSENK	S(19.64)S(10.02)S(-10.02)AGFS(-10.02)FGT(-19.64)GVINS(-82.46)T(-98.91)PAPANT(-163.99)IVT(-201.42)S(-211.77)ENK	1	4	-0.2638	234350000	0	234350000	0	NaN	180	124	1017	1017	510	627;628	957;958	2188;2189;2190;2191	957	2190	54144	961	2200	64882	962	2204	64924
P49790	1018	P49790	Nuclear pore complex protein Nup153	NUP153	0.828891	10.0231	0	329.79	306.5	243.41	2	S	SNLGQEEKKEELPKSSSAGFSFGTGVINSTP	X;X;X;X;X;X;X;X;X;X;X;X;X;X;GalT_UC1;GalT_UC1;X;X;X;X;X;X;X;X;X;X;X;X;X;X;X	XXXXXXXXXXXXXXPPPPPPPPPPPPPPPPP	S(0.98)S(0.829)S(0.091)AGFS(0.09)FGT(0.01)GVINSTPAPANTIVTSENK	S(19.64)S(10.02)S(-10.02)AGFS(-10.02)FGT(-19.64)GVINS(-82.46)T(-98.91)PAPANT(-163.99)IVT(-201.42)S(-211.77)ENK	2	4	-0.2638	234350000	0	234350000	0	NaN	181	124	1018	1018	510	627;628	957;958	2188;2189;2190;2191	957	2190	54144	961	2200	64882	962	2204	64924
P49790	1041	P49790	Nuclear pore complex protein Nup153	NUP153	0.985565	21.3638	6.57521e-124	157.91	132.04	153.95	1	T	TGVINSTPAPANTIVTSENKSSFNLGTIETK	X;X;X;X;X;X;X;X;X;X;X;X;X;X;X;GalT_UC1;X;X;X;X;X;X;X;X;X;X;X;X;X;GalT_UC1;X	PPPPPPPPPPPPPPPPPPPPXXXXXXXXXXX	SSSAGFSFGTGVINSTPAPANT(0.007)IVT(0.986)S(0.007)ENK	S(-126.81)S(-126.81)S(-126.81)AGFS(-98.48)FGT(-88.2)GVINS(-54.59)T(-44.88)PAPANT(-21.36)IVT(21.36)S(-21.36)ENK	25	4	0.035367	44344000	44344000	0	0	NaN	709	124	1041	1041	510	627;628	959;960	2192;2193;2194;2195;2196;2197;2198	959	2193	63515	960	2197	64105	960	2197	64105
P49790	1055	P49790	Nuclear pore complex protein Nup153	NUP153	0.999996	54.3842	6.14159e-40	128.27	113.51	128.27	1	T	VTSENKSSFNLGTIETKSASVAPFTCKTSEA	X;GalT_UC1;X;X;X;X;X;X;X;X;X;X;X;X;X;GalT_UC1;X;X;X;X;X;X;X;X;X;X;X;X;X;X;X	XXXXXXPPPPPPPPPPPXXXXXXXXXXXXXX	SSFNLGTIET(1)K	S(-96.79)S(-89.39)FNLGT(-54.38)IET(54.38)K	10	3	-0.6292	4715700	4715700	0	0	NaN	707	124	1055	1055	505	620	946	2163	946	2163	26709	946	2163	26709	946	2163	26709
P49790	1112	P49790	Nuclear pore complex protein Nup153	NUP153	0.997451	25.8584	1.29008e-250	214.82	182.2	76.326	1;2	T	VFVLGRTEEKQQEPVTSTSLVFGKKADNEEP	X;X;X;X;X;X;X;X;X;X;X;X;X;X;X;GalT_UC1;GalT_UC1;X;X;X;X;X;X;X;X;X;X;X;X;X;X	XXXXXXXXXXPPPPPPPPPPPPPPXXXXXXX	QQEPVT(0.997)S(0.926)T(0.074)S(0.003)LVFGK	QQEPVT(25.86)S(11.09)T(-11.09)S(-25.86)LVFGK	6	4	-0.32953	900210000	884890000	15316000	0	NaN	706	124	1112	1112	421	510;511	782;783	1767;1768;1769;1770	782	1767	20870	783	1768	31674	783	1768	31674
P49790	1113	P49790	Nuclear pore complex protein Nup153	NUP153	0.925776	11.0922	5.06818e-06	76.326	55.096	76.326	2	S	FVLGRTEEKQQEPVTSTSLVFGKKADNEEPK	X;X;X;X;X;X;X;X;X;X;X;X;X;X;GalT_UC1;GalT_UC1;X;X;X;X;X;X;X;X;X;X;X;X;X;X;X	XXXXXXXXXPPPPPPPPPPPPPPXXXXXXXX	QQEPVT(0.997)S(0.926)T(0.074)S(0.003)LVFGK	QQEPVT(25.86)S(11.09)T(-11.09)S(-25.86)LVFGK	7	4	-0.32953	15316000	0	15316000	0	NaN	179	124	1113	1113	421	510;511	782	1767	782	1767	20870	782	1767	20870	782	1767	20870
P49790	1156	P49790	Nuclear pore complex protein Nup153	NUP153	0.995256	23.2277	3.23058e-122	172.56	139.01	172.56	1	T	TKDENSSKSTFSFSMTKPSEKESEQPAKATF	X;X;X;X;X;X;X;X;X;X;X;X;X;X;X;GalT_UC1;X;X;X;X;X;X;X;X;X;X;X;X;X;GalT_UC1;X	XXXXXXXXPPPPPPPPPPPPPXXXXXXXXXX	STFSFSMT(0.995)KPS(0.005)EK	S(-117.79)T(-117.52)FS(-90.93)FS(-49.87)MT(23.23)KPS(-23.23)EK	8	4	-0.093832	183570000	183570000	0	0	NaN	711	124	1156	1156	520	642	986;987	2262;2263;2264	986	2263	20300	986	2263	20300	986	2263	20300
P49790	1170	P49790	Nuclear pore complex protein Nup153	NUP153	0.999983	51.8747	1.3708e-46	141.32	129.4	141.32	1	T	MTKPSEKESEQPAKATFAFGAQTSTTADQGA	X;GalT_UC1;X;X;X;X;X;X;X;X;X;X;X;X;X;GalT_UC1;X;X;X;X;X;X;X;X;X;X;X;X;X;X;X	XXXXXXXXXXXXXXPPPPPPPPPPPPPPPPP	AT(1)FAFGAQTSTTADQGAAK	AT(51.87)FAFGAQT(-51.87)S(-51.87)T(-56.96)T(-56.96)ADQGAAK	2	2	0.39653	73430000	73430000	0	0	1.339	698	124	1170	1170	58	77;79	136;137	380;381;382	136	380	23672	136	380	23672	137	382	24218
P49790	1179	P49790	Nuclear pore complex protein Nup153	NUP153	0.91887	10.9205	8.25109e-08	80.522	66.363	80.522	2	T	EQPAKATFAFGAQTSTTADQGAAKPVFSFLN	X;X;X;X;X;X;X;X;X;X;X;X;X;X;X;GalT_UC1;GalT_UC1;X;X;X;X;X;X;X;X;X;X;X;X;X;X	XXXXXPPPPPPPPPPPPPPPPPPPXXXXXXX	ATFAFGAQT(0.008)S(0.081)T(0.919)T(0.992)ADQGAAK	AT(-57.04)FAFGAQT(-21.34)S(-10.92)T(10.92)T(21.34)ADQGAAK	11	4	-0.63767	57608000	0	57608000	0	1.0505	699	124	1179	1179	58	77;79	132;133	375;376	133	376	16513	133	376	16513	133	376	16513
P49790	1180	P49790	Nuclear pore complex protein Nup153	NUP153	0.991921	21.3376	8.25109e-08	80.522	66.363	80.522	2	T	QPAKATFAFGAQTSTTADQGAAKPVFSFLNN	X;X;X;X;X;X;X;X;X;X;X;X;X;X;GalT_UC1;GalT_UC1;X;X;X;X;X;X;X;X;X;X;X;X;X;X;X	XXXXPPPPPPPPPPPPPPPPPPPXXXXXXXX	ATFAFGAQT(0.008)S(0.081)T(0.919)T(0.992)ADQGAAK	AT(-57.04)FAFGAQT(-21.34)S(-10.92)T(10.92)T(21.34)ADQGAAK	12	4	-0.63767	57608000	0	57608000	0	1.0505	700	124	1180	1180	58	77;79	132;133	375;376	133	376	16513	133	376	16513	133	376	16513
P49792	1513	P49792	E3 SUMO-protein ligase RanBP2	RANBP2	0.998	27.0297	1.72432e-128	172.11	131.68	172.11	1	T	KCAACQNPRKQSLPATSIPTPASFKFGTSET	X;X;X;X;X;X;X;X;X;X;X;X;X;X;X;GalT_UC1;X;X;X;X;X;X;X;X;X;X;X;X;X;X;X	XXXXXXXXXPPPPPPPPPPPPPPPPXXXXXX	QS(0.002)LPAT(0.998)SIPTPASFK	QS(-27.03)LPAT(27.03)S(-46.57)IPT(-94.47)PAS(-134.69)FK	6	3	-0.68107	26302000	26302000	0	0	NaN	714	125	1513	1513	252;422	310;512	500;784	1161;1771;1772;1773;1774	784	1772	43874	784	1772	43874	784	1772	43874
Q7Z3J3;A6NKT7;Q99666;O14715;P49792	919;919;918;918;1894	P49792	RanBP2-like and GRIP domain-containing protein 4;RanBP2-like and GRIP domain-containing protein 3;RANBP2-like and GRIP domain-containing protein 5/6;RANBP2-like and GRIP domain-containing protein 8;E3 SUMO-protein ligase RanBP2	RGPD4;RGPD3;RGPD5;RGPD8;RANBP2	0.99867	28.7571	4.34186e-56	136.27	101.52	136.27	1	S	NTEFKSTKEGFSIPVSADGFKFGISEPGNQE	X;X;X;X;X;X;X;X;X;X;X;X;X;X;X;GalT_UC1;X;X;X;X;X;X;X;X;X;X;X;X;X;X;X	XXXXXXXXPPPPPPPPPPPPPXXXXXXXXXX	EGFS(0.001)IPVS(0.999)ADGFK	EGFS(-28.76)IPVS(28.76)ADGFK	8	3	0.072181	415550000	415550000	0	0	NaN	3	8;125	919;1894	1894	101	128	205;206;207	506;507;508;509;510;511	206	508	50788	206	508	50788	206	508	50788
Q7Z3J3;A6NKT7;Q99666;O14715;P0DJD0;P0DJD1;P49792	978;978;977;977;962;970;1953	P49792	RanBP2-like and GRIP domain-containing protein 4;RanBP2-like and GRIP domain-containing protein 3;RANBP2-like and GRIP domain-containing protein 5/6;RANBP2-like and GRIP domain-containing protein 8;RANBP2-like and GRIP domain-containing protein 1;RANBP2-like and GRIP domain-containing protein 2;E3 SUMO-protein ligase RanBP2	RGPD4;RGPD3;RGPD5;RGPD8;RGPD1;RGPD2;RANBP2	0.944657	12.3238	3.67456e-98	161.27	149.95	161.27	1	S	FGQTSSTFTFADLAKSTSGEGFQFGKKDPNF;FGQTSSTFTFADVAKSTSGEGFQFGKKDPNF	X;X;X;X;X;X;X;X;X;X;X;X;X;X;X;GalT_UC1;X;X;X;X;X;X;X;X;X;X;X;X;X;X;X	XXXXXXXXXXXXXXXPPPPPPPPPPPXXXXX	S(0.945)T(0.055)SGEGFQFGK	S(12.32)T(-12.32)S(-46.41)GEGFQFGK	1	3	0.075672	26973000	26973000	0	0	NaN	5	8;125	978;1953	1953	529	653	1004	2298;2299	1004	2298	12711	1004	2298	12711	1004	2298	12711
Q7Z3J3;A6NKT7;Q99666;O14715;P0DJD0;P0DJD1;P49792	979;979;978;978;963;971;1954	P49792	RanBP2-like and GRIP domain-containing protein 4;RanBP2-like and GRIP domain-containing protein 3;RANBP2-like and GRIP domain-containing protein 5/6;RANBP2-like and GRIP domain-containing protein 8;RANBP2-like and GRIP domain-containing protein 1;RANBP2-like and GRIP domain-containing protein 2;E3 SUMO-protein ligase RanBP2	RGPD4;RGPD3;RGPD5;RGPD8;RGPD1;RGPD2;RANBP2	0.832102	7.18038	8.01477e-05	63.16	53.872	63.16		T	GQTSSTFTFADLAKSTSGEGFQFGKKDPNFK;GQTSSTFTFADVAKSTSGEGFQFGKKDPNFK	X;X;X;X;X;X;X;X;X;X;X;X;X;X;X;GalT_UC1;X;X;X;X;X;X;X;X;X;X;X;X;X;X;X	XXXXXXXXXXXXXXPPPPPPPPPPPXXXXXX	S(0.159)T(0.832)S(0.009)GEGFQFGK	S(-7.18)T(7.18)S(-19.84)GEGFQFGK	2	2	0.31235	19739000	19739000	0	0	NaN	577	8;125	979;1954	1954	529	653	1005	2300	1005	2300	12790	1005	2300	12790	1005	2300	12790
P50402	49	P50402	Emerin	EMD	0.992374	24.155	0	244.36	226.96	244.36	1	S	YEKKIFEYETQRRRLSPPSSSAASSYSFSDL	X;X;X;X;X;X;X;X;X;X;X;X;X;X;X;GalT_UC1;X;X;X;X;X;X;X;X;X;X;X;X;X;X;X	XXXXXXXXXXXXXXPPPPPPPPPPPPPPPPP	LS(0.992)PPS(0.004)S(0.004)SAASSYSFSDLNSTR	LS(24.15)PPS(-24.15)S(-24.15)S(-58.7)AAS(-107.17)S(-128.01)YS(-182.16)FS(-217.58)DLNS(-238.65)T(-240.92)R	2	3	-0.10547	52874000	52874000	0	0	NaN	189	127	49	49	298	363	573	1301;1302;1303;1304	573	1304	42645	573	1304	42645	573	1304	42645
P50897	199	P50897	Palmitoyl-protein thioesterase 1	PPT1	1	107.114	1.10106e-18	107.11	87.007	107.11	1	S	EYWHDPIKEDVYRNHSIFLADINQERGINES	X;X;X;X;X;X;X;X;X;X;X;X;X;X;X;GalT_UC1;X;X;X;X;X;X;X;X;X;X;X;X;X;X;X	XXXXXXXXXXXXXPPPPPPPPPPPPPXXXXX	NHS(1)IFLADINQER	NHS(107.11)IFLADINQER	3	4	-0.012204	10229000	10229000	0	0	NaN	191	129	199	199	330	405	631	1407;1408	631	1408	25957	631	1408	25957	631	1408	25957
P51003	7	P51003	Poly(A) polymerase alpha	PAPOLA	0.990342	20.1107	8.05946e-69	136.3	117.42	136.3	1	T	_________MPFPVTTQGSQQTQPPQKHYGI	X;X;X;X;X;X;X;X;X;X;X;X;X;X;X;GalT_UC1;X;X;X;X;X;X;X;X;X;X;X;X;X;X;X	XXXXXXXXXXPPPPPPPPPPPPPPPPPXXXX	PFPVT(0.01)T(0.99)QGSQQTQPPQK	PFPVT(-20.11)T(20.11)QGS(-54.67)QQT(-101.21)QPPQK	6	3	0.16256	49851000	49851000	0	0	NaN	725	130	7	7	358	436	680	1513;1514;1515;1516	680	1514	17210	680	1514	17210	680	1514	17210
P51610	405	P51610	Host cell factor 1;HCF N-terminal chain 1;HCF N-terminal chain 2;HCF N-terminal chain 3;HCF N-terminal chain 4;HCF N-terminal chain 5;HCF N-terminal chain 6;HCF C-terminal chain 1;HCF C-terminal chain 2;HCF C-terminal chain 3;HCF C-terminal chain 4;HCF C-terminal chain 5;HCF C-terminal chain 6	HCFC1	0.999992	50.7218	3.63825e-202	192.69	184.2	192.69	1	T	ADSYLLQLQKYDIPATAATATSPTPNPVPSV	X;X;X;X;X;X;X;X;X;X;X;X;X;X;X;GalT_UC1;X;X;X;X;X;X;X;X;X;X;X;X;X;X;X	XXXXXXXXXXPPPPPPPPPPPPPPPPPPPPP	YDIPAT(1)AATATSPTPNPVPSVPANPPK	YDIPAT(50.72)AAT(-50.72)AT(-88.64)S(-97.49)PT(-106.07)PNPVPS(-151.2)VPANPPK	6	3	0.27406	229390000	229390000	0	0	NaN	763	131	405	405	720	892	1389	3296;3297;3298	1389	3297	54249	1389	3297	54249	1389	3297	54249
P51610	480	P51610	Host cell factor 1;HCF N-terminal chain 1;HCF N-terminal chain 2;HCF N-terminal chain 3;HCF N-terminal chain 4;HCF N-terminal chain 5;HCF N-terminal chain 6;HCF C-terminal chain 1;HCF C-terminal chain 2;HCF C-terminal chain 3;HCF C-terminal chain 4;HCF C-terminal chain 5;HCF C-terminal chain 6	HCFC1	1	45.368	0.0285891	45.368	24.117	45.368		T	PTVPGSSISVPTAARTQGVPAVLKVTGPQAT	X;X;X;X;X;X;X;X;X;X;X;X;X;X;X;GalT_UC1;X;X;X;X;X;X;X;X;X;GalT_UC1;X;X;X;X;GalT_UC1	XXXXXXXXXXXXXXXPPPPPPPPPXXXXXXX	T(1)QGVPAVLK	T(45.37)QGVPAVLK	1	2	0.13114	28415000	28415000	0	0	NaN	758	131	480	480	604	752	1192	2824	1192	2824	13405	1192	2824	13405	1192	2824	13405
P51610	490	P51610	Host cell factor 1;HCF N-terminal chain 1;HCF N-terminal chain 2;HCF N-terminal chain 3;HCF N-terminal chain 4;HCF N-terminal chain 5;HCF N-terminal chain 6;HCF C-terminal chain 1;HCF C-terminal chain 2;HCF C-terminal chain 3;HCF C-terminal chain 4;HCF C-terminal chain 5;HCF C-terminal chain 6	HCFC1	1	103.391	1.32355e-190	188.44	173.52	188.44	1	T	PTAARTQGVPAVLKVTGPQATTGTPLVTMRP	X;X;X;X;X;GalT_UC1;X;X;X;X;X;X;X;X;X;GalT_UC1;X;X;X;X;GalT_UC1;X;X;X;X;X;X;X;X;X;X	XXXXXXXXXXXXXXPPPPPPPPPPPPPPPPP	VT(1)GPQATTGTPLVTMRPASQAGK	VT(103.39)GPQAT(-103.39)T(-123.15)GT(-142.71)PLVT(-145.62)MRPAS(-174.81)QAGK	2	4	-0.29013	83889000	66587000	17302000	0	1.7241	760	131	490	490	704;705	872;874	1358;1360;1361	3220;3222;3223;3224;3225;3226;3227;3228	1361	3228	26103	1361	3228	26103	1361	3228	26103
P51610	515	P51610	Host cell factor 1;HCF N-terminal chain 1;HCF N-terminal chain 2;HCF N-terminal chain 3;HCF N-terminal chain 4;HCF N-terminal chain 5;HCF N-terminal chain 6;HCF C-terminal chain 1;HCF C-terminal chain 2;HCF C-terminal chain 3;HCF C-terminal chain 4;HCF C-terminal chain 5;HCF C-terminal chain 6	HCFC1	0.999991	50.2365	3.01494e-103	162.36	134.68	162.36	1	T	LVTMRPASQAGKAPVTVTSLPAGVRMVVPTQ	X;X;X;X;X;X;X;X;X;X;X;X;X;X;X;GalT_UC1;X;X;X;X;X;X;X;X;X;X;X;X;X;X;X	XXXXXXXXXXXXPPPPPPPPPPPPPXXXXXX	APVT(1)VTSLPAGVR	APVT(50.24)VT(-50.24)S(-81.58)LPAGVR	4	3	-0.38867	142330000	142330000	0	0	4.5599	726	131	515	515	29	35	56	169;170;171;172;173;174;175	56	170	27965	56	170	27965	56	170	27965
P51610	562	P51610	Host cell factor 1;HCF N-terminal chain 1;HCF N-terminal chain 2;HCF N-terminal chain 3;HCF N-terminal chain 4;HCF N-terminal chain 5;HCF N-terminal chain 6;HCF C-terminal chain 1;HCF C-terminal chain 2;HCF C-terminal chain 3;HCF C-terminal chain 4;HCF C-terminal chain 5;HCF C-terminal chain 6	HCFC1	0.934636	11.5548	1.04009e-298	223.06	202.41	223.06	1	S	AALAAAAAATQKIPPSSAPTVLSVPAGTTIV	X;X;X;X;X;X;X;X;X;X;X;X;X;X;X;GalT_UC1;X;X;X;X;X;X;X;X;X;X;X;X;X;X;X	XXXXXXXXXXXXPPPPPPPPPPPPPPPPPPP	IPPS(0.935)S(0.065)APTVLSVPAGTTIVK	IPPS(11.55)S(-11.55)APT(-45.43)VLS(-125.99)VPAGT(-181.02)T(-186.56)IVK	4	3	0.058573	697350000	697350000	0	0	23.352	196	131	562	562	222	272	433;434;435	1030;1031;1032;1033;1034;1035;1036;1037;1038	433	1031	53932	433	1031	53932	433	1031	53932
P51610	563	P51610	Host cell factor 1;HCF N-terminal chain 1;HCF N-terminal chain 2;HCF N-terminal chain 3;HCF N-terminal chain 4;HCF N-terminal chain 5;HCF N-terminal chain 6;HCF C-terminal chain 1;HCF C-terminal chain 2;HCF C-terminal chain 3;HCF C-terminal chain 4;HCF C-terminal chain 5;HCF C-terminal chain 6	HCFC1	0.924733	10.8975	2.95978e-169	170.11	152.9	170.11	1	S	ALAAAAAATQKIPPSSAPTVLSVPAGTTIVK	X;X;X;X;X;X;X;X;X;X;X;X;X;X;X;GalT_UC1;X;X;X;X;X;X;X;X;X;X;X;X;X;X;X	XXXXXXXXXXXPPPPPPPPPPPPPPPPPPPP	IPPS(0.075)S(0.925)APTVLSVPAGTTIVK	IPPS(-10.9)S(10.9)APT(-42.05)VLS(-112.59)VPAGT(-147.64)T(-154.27)IVK	5	3	-0.090273	0	0	0	0	0	197	131	563	563	222	272	437	1040	437	1040	55467	437	1040	55467	437	1040	55467
P51610	579	P51610	Host cell factor 1;HCF N-terminal chain 1;HCF N-terminal chain 2;HCF N-terminal chain 3;HCF N-terminal chain 4;HCF N-terminal chain 5;HCF N-terminal chain 6;HCF C-terminal chain 1;HCF C-terminal chain 2;HCF C-terminal chain 3;HCF C-terminal chain 4;HCF C-terminal chain 5;HCF C-terminal chain 6	HCFC1	1	85.9283	1.84195e-150	184.87	164.99	184.87	1;2	T	APTVLSVPAGTTIVKTMAVTPGTTTLPATVK	X;X;X;X;X;X;X;X;X;X;X;X;X;X;X;GalT_UC1;X;X;X;X;X;X;X;X;GalT_UC1;X;X;X;X;X;X	XXXXXXXXXXXXXXXPPPPPPPPPPPPPPPP	T(1)MAVTPGTTTLPATVK	T(85.93)MAVT(-85.93)PGT(-121.71)T(-128.89)T(-142.19)LPAT(-168.51)VK	1	3	0.037057	669120000	469080000	200050000	0	8.0938	755	131	579	579	586	729;730	1161;1162;1163;1164	2738;2739;2740;2741;2742;2743;2744;2745;2746;2747;2748;2749;2750;2751;2752	1164	2744	33568	1164	2744	33568	1164	2744	33568
P51610	588	P51610	Host cell factor 1;HCF N-terminal chain 1;HCF N-terminal chain 2;HCF N-terminal chain 3;HCF N-terminal chain 4;HCF N-terminal chain 5;HCF N-terminal chain 6;HCF C-terminal chain 1;HCF C-terminal chain 2;HCF C-terminal chain 3;HCF C-terminal chain 4;HCF C-terminal chain 5;HCF C-terminal chain 6	HCFC1	0.830949	8.42693	1.26181e-49	129.71	112.34	129.71	2	T	GTTIVKTMAVTPGTTTLPATVKVASSPVMVS	X;X;X;X;X;X;GalT_UC1;X;X;X;X;X;X;X;X;GalT_UC1;X;X;X;X;X;X;X;X;GalT_UC1;X;X;X;X;X;X	XXXXXXPPPPPPPPPPPPPPPPXXXXXXXXX	T(1)MAVTPGT(0.007)T(0.119)T(0.831)LPAT(0.042)VK	T(53.12)MAVT(-43.42)PGT(-20.49)T(-8.43)T(8.43)LPAT(-12.94)VK	10	4	-0.40193	132130000	0	132130000	0	1.5983	756	131	588	588	586	729;730	1161	2738;2739;2740	1161	2739	23825	1162	2741	23907	1162	2741	23907
P51610	597	P51610	Host cell factor 1;HCF N-terminal chain 1;HCF N-terminal chain 2;HCF N-terminal chain 3;HCF N-terminal chain 4;HCF N-terminal chain 5;HCF N-terminal chain 6;HCF C-terminal chain 1;HCF C-terminal chain 2;HCF C-terminal chain 3;HCF C-terminal chain 4;HCF C-terminal chain 5;HCF C-terminal chain 6	HCFC1	0.885305	8.8767	0.000964157	55.841	45.373	55.841	1	S	VTPGTTTLPATVKVASSPVMVSNPATRMLKT	X;X;X;X;X;X;GalT_UC1;X;X;X;X;X;X;X;X;GalT_UC1;X;X;X;X;X;X;X;X;X;X;X;X;X;X;GalT_UC1	XXXXXXXXXXXXXPPPPPPPPPPPPPPXXXX	VAS(0.885)S(0.115)PVMVSNPATR	VAS(8.88)S(-8.88)PVMVS(-45.19)NPAT(-52.58)R	3	3	-0.59479	5517700	5517700	0	0	NaN	206	131	597	597	652	811	1272	2993	1272	2993	18067	1272	2993	18067	1272	2993	18067
P51610	612	P51610	Host cell factor 1;HCF N-terminal chain 1;HCF N-terminal chain 2;HCF N-terminal chain 3;HCF N-terminal chain 4;HCF N-terminal chain 5;HCF N-terminal chain 6;HCF C-terminal chain 1;HCF C-terminal chain 2;HCF C-terminal chain 3;HCF C-terminal chain 4;HCF C-terminal chain 5;HCF C-terminal chain 6	HCFC1	0.996069	24.7139	1.24246e-180	189.13	189.13	120.08	1	T	SSPVMVSNPATRMLKTAAAQVGTSVSSATNT	GalT_UC1;X;X;X;X;X;X;X;X;X;X;X;X;X;X;GalT_UC1;X;X;X;X;X;X;X;X;X;X;X;X;X;X;X	XXXXXXXXXXXXXXXPPPPPPPPPPPPPPPP	T(0.996)AAAQVGT(0.003)S(0.001)VSSATNTSTRPIITVHK	T(24.71)AAAQVGT(-24.71)S(-32.74)VS(-44.68)S(-55.37)AT(-69.8)NT(-78.05)S(-86.78)T(-90.44)RPIIT(-100.52)VHK	1	5	0.13627	348140000	348140000	0	0	1.0132	747	131	612	612	540;541	669;670;672;673	1044;1065;1070;1073	2401;2453;2454;2471;2472;2483;2484	1065	2453	21401	1045	2405	10920	1045	2405	10920
P51610	619	P51610	Host cell factor 1;HCF N-terminal chain 1;HCF N-terminal chain 2;HCF N-terminal chain 3;HCF N-terminal chain 4;HCF N-terminal chain 5;HCF N-terminal chain 6;HCF C-terminal chain 1;HCF C-terminal chain 2;HCF C-terminal chain 3;HCF C-terminal chain 4;HCF C-terminal chain 5;HCF C-terminal chain 6	HCFC1	0.871367	10.4732	1.21528e-29	96.045	91.33	96.045	2	T	NPATRMLKTAAAQVGTSVSSATNTSTRPIIT	X;X;X;X;X;X;X;X;X;X;X;X;X;X;X;GalT_UC1;GalT_UC1;X;X;X;X;X;X;X;X;X;X;X;X;X;X	XXXXXXXXPPPPPPPPPPPPPPPPPPPPPPP	T(0.008)AAAQVGT(0.871)S(0.934)VS(0.135)S(0.051)ATNTSTRPIITVHK	T(-20.52)AAAQVGT(10.47)S(12.31)VS(-10.47)S(-12.31)AT(-35.91)NT(-47.71)S(-49.47)T(-49.47)RPIIT(-62.98)VHK	8	4	0.086601	181630000	0	181630000	0	0.52861	748	131	619	619	540;541	669;670;672;673	1062	2445;2446;2447	1062	2445	18157	1062	2445	18157	1062	2445	18157
P51610	620	P51610	Host cell factor 1;HCF N-terminal chain 1;HCF N-terminal chain 2;HCF N-terminal chain 3;HCF N-terminal chain 4;HCF N-terminal chain 5;HCF N-terminal chain 6;HCF C-terminal chain 1;HCF C-terminal chain 2;HCF C-terminal chain 3;HCF C-terminal chain 4;HCF C-terminal chain 5;HCF C-terminal chain 6	HCFC1	0.934062	12.3117	1.31837e-280	219.01	206.33	96.045	1;2	S	PATRMLKTAAAQVGTSVSSATNTSTRPIITV	X;X;X;X;X;X;X;X;X;X;X;X;X;X;GalT_UC1;GalT_UC1;X;X;X;X;GalT_UC1;X;X;X;X;X;X;X;X;X;X	XXXXXXXPPPPPPPPPPPPPPPPPPPPPPPP	T(0.008)AAAQVGT(0.871)S(0.934)VS(0.135)S(0.051)ATNTSTRPIITVHK	T(-20.52)AAAQVGT(10.47)S(12.31)VS(-10.47)S(-12.31)AT(-35.91)NT(-47.71)S(-49.47)T(-49.47)RPIIT(-62.98)VHK	9	4	0.086601	407420000	163340000	244080000	0	1.1857	202	131	620	620	540;541	669;670;672;673	1043;1057;1058;1062;1067	2398;2399;2400;2431;2432;2433;2434;2445;2446;2447;2459;2460;2461	1062	2445	18157	1067	2460	21466	1067	2460	21466
P51610	622	P51610	Host cell factor 1;HCF N-terminal chain 1;HCF N-terminal chain 2;HCF N-terminal chain 3;HCF N-terminal chain 4;HCF N-terminal chain 5;HCF N-terminal chain 6;HCF C-terminal chain 1;HCF C-terminal chain 2;HCF C-terminal chain 3;HCF C-terminal chain 4;HCF C-terminal chain 5;HCF C-terminal chain 6	HCFC1	0.958355	13.8164	0	231.75	218.5	231.75	1;2	S	TRMLKTAAAQVGTSVSSATNTSTRPIITVHK	X;X;X;X;X;X;X;X;X;X;X;X;X;X;X;GalT_UC1;GalT_UC1;X;GalT_UC1;X;X;X;X;X;X;X;X;X;X;X;X	XXXXXPPPPPPPPPPPPPPPPPPPPPPPPPP	TAAAQVGTS(0.04)VS(0.958)S(0.004)AT(0.998)NTSTRPIITVHK	T(-78.86)AAAQVGT(-40.66)S(-13.82)VS(13.82)S(-27.37)AT(27.37)NT(-40.66)S(-53.68)T(-66.41)RPIIT(-146.87)VHK	11	4	-0.1141	1197300000	565260000	632000000	0	3.4844	203	131	622	622	540;541	669;670;672;673	1042;1059;1060;1061;1063;1071;1072	2396;2397;2435;2436;2437;2438;2439;2440;2441;2442;2443;2444;2448;2449;2450;2473;2474;2475;2476;2477;2478;2479;2480;2481;2482	1060	2441	16887	1060	2441	16887	1060	2441	16887
P51610	623	P51610	Host cell factor 1;HCF N-terminal chain 1;HCF N-terminal chain 2;HCF N-terminal chain 3;HCF N-terminal chain 4;HCF N-terminal chain 5;HCF N-terminal chain 6;HCF C-terminal chain 1;HCF C-terminal chain 2;HCF C-terminal chain 3;HCF C-terminal chain 4;HCF C-terminal chain 5;HCF C-terminal chain 6	HCFC1	0.883593	9.60503	2.1592e-84	143.38	130.49	72.496	2	S	RMLKTAAAQVGTSVSSATNTSTRPIITVHKS	X;X;X;X;X;X;X;X;X;X;X;X;X;X;GalT_UC1;GalT_UC1;X;X;X;X;X;X;X;X;X;X;X;X;X;X;GalT_UC1	XXXXPPPPPPPPPPPPPPPPPPPPPPPPPPX	TAAAQVGT(0.013)S(0.101)VS(0.886)S(0.884)AT(0.1)NT(0.013)S(0.002)T(0.002)R	T(-41.11)AAAQVGT(-18.74)S(-9.61)VS(9.61)S(9.61)AT(-9.61)NT(-18.74)S(-27.38)T(-27.38)R	12	4	-0.14833	435730000	0	435730000	0	1.2681	204	131	623	623	540;541	669;670;672;673	1042;1061;1063	2396;2397;2444;2448;2449;2450	1042	2397	8226	1063	2449	18244	1063	2449	18244
P51610	625	P51610	Host cell factor 1;HCF N-terminal chain 1;HCF N-terminal chain 2;HCF N-terminal chain 3;HCF N-terminal chain 4;HCF N-terminal chain 5;HCF N-terminal chain 6;HCF C-terminal chain 1;HCF C-terminal chain 2;HCF C-terminal chain 3;HCF C-terminal chain 4;HCF C-terminal chain 5;HCF C-terminal chain 6	HCFC1	0.998075	27.3721	0	231.75	218.5	231.75	1;2	T	LKTAAAQVGTSVSSATNTSTRPIITVHKSGT	X;X;X;X;X;X;X;X;X;X;GalT_UC1;X;GalT_UC1;X;X;GalT_UC1;X;X;X;X;X;X;X;X;X;X;X;X;GalT_UC1;X;GalT_UC1	XXPPPPPPPPPPPPPPPPPPPPPPPPPPXXX	TAAAQVGTS(0.04)VS(0.958)S(0.004)AT(0.998)NTSTRPIITVHK	T(-78.86)AAAQVGT(-40.66)S(-13.82)VS(13.82)S(-27.37)AT(27.37)NT(-40.66)S(-53.68)T(-66.41)RPIIT(-146.87)VHK	14	4	-0.1141	817800000	210030000	607780000	0	2.3801	749	131	625	625	540;541	669;670;672;673	1057;1058;1059;1060;1063;1068;1069	2431;2432;2433;2434;2435;2436;2437;2438;2439;2440;2441;2442;2443;2448;2449;2450;2462;2463;2464;2465;2466;2467;2468;2469;2470	1060	2441	16887	1060	2441	16887	1060	2441	16887
P51610	638	P51610	Host cell factor 1;HCF N-terminal chain 1;HCF N-terminal chain 2;HCF N-terminal chain 3;HCF N-terminal chain 4;HCF N-terminal chain 5;HCF N-terminal chain 6;HCF C-terminal chain 1;HCF C-terminal chain 2;HCF C-terminal chain 3;HCF C-terminal chain 4;HCF C-terminal chain 5;HCF C-terminal chain 6	HCFC1	0.999996	58.69	4.20866e-22	101.94	95.359	67.864	2;3	S	SATNTSTRPIITVHKSGTVTVAQQAQVVTTV	GalT_UC1;X;GalT_UC1;X;GalT_UC1;X;X;X;X;X;X;X;X;X;X;GalT_UC1;X;GalT_UC1;X;GalT_UC1;X;X;X;X;X;X;X;X;X;X;X	XXXXXXXXXXXXXXXPPPPPPPPPPPPPPPP	S(1)GT(1)VT(1)VAQQAQVVTTVVGGVTK	S(58.69)GT(58.69)VT(58.69)VAQQAQVVT(-58.69)T(-61.87)VVGGVT(-63.45)K	1	5	0.16419	1604600000	0	1577000000	27628000	NaN	200	131	638	638	449	551;552;553	845;847;848;849	1911;1912;1914;1915;1916;1917;1918;1919;1920;1921;1922;1923;1924;1925;1926	845	1911	24295	847	1914	29620	847	1914	29620
P51610	640	P51610	Host cell factor 1;HCF N-terminal chain 1;HCF N-terminal chain 2;HCF N-terminal chain 3;HCF N-terminal chain 4;HCF N-terminal chain 5;HCF N-terminal chain 6;HCF C-terminal chain 1;HCF C-terminal chain 2;HCF C-terminal chain 3;HCF C-terminal chain 4;HCF C-terminal chain 5;HCF C-terminal chain 6	HCFC1	0.999996	58.69	4.20866e-22	101.94	95.359	67.864	2;3	T	TNTSTRPIITVHKSGTVTVAQQAQVVTTVVG	GalT_UC1;X;GalT_UC1;X;X;X;X;X;X;X;X;X;X;GalT_UC1;X;GalT_UC1;X;GalT_UC1;X;X;X;X;X;X;X;X;X;X;X;X;X	XXXXXXXXXXXXXPPPPPPPPPPPPPPPPPP	S(1)GT(1)VT(1)VAQQAQVVTTVVGGVTK	S(58.69)GT(58.69)VT(58.69)VAQQAQVVT(-58.69)T(-61.87)VVGGVT(-63.45)K	3	5	0.16419	1604600000	0	1577000000	27628000	NaN	741	131	640	640	449	551;552;553	845;847;848;849	1911;1912;1914;1915;1916;1917;1918;1919;1920;1921;1922;1923;1924;1925;1926	845	1911	24295	847	1914	29620	847	1914	29620
P51610	642	P51610	Host cell factor 1;HCF N-terminal chain 1;HCF N-terminal chain 2;HCF N-terminal chain 3;HCF N-terminal chain 4;HCF N-terminal chain 5;HCF N-terminal chain 6;HCF C-terminal chain 1;HCF C-terminal chain 2;HCF C-terminal chain 3;HCF C-terminal chain 4;HCF C-terminal chain 5;HCF C-terminal chain 6	HCFC1	0.999996	58.69	3.23815e-12	67.864	63.473	67.864	3	T	TSTRPIITVHKSGTVTVAQQAQVVTTVVGGV	GalT_UC1;X;X;X;X;X;X;X;X;X;X;GalT_UC1;X;GalT_UC1;X;GalT_UC1;X;X;X;X;X;X;X;X;X;X;X;X;X;X;X	XXXXXXXXXXXPPPPPPPPPPPPPPPPPPPP	S(1)GT(1)VT(1)VAQQAQVVTTVVGGVTK	S(58.69)GT(58.69)VT(58.69)VAQQAQVVT(-58.69)T(-61.87)VVGGVT(-63.45)K	5	5	0.16419	27628000	0	0	27628000	NaN	742	131	642	642	449	551;552;553	845	1911;1912	845	1911	24295	845	1911	24295	845	1911	24295
P51610	651	P51610	Host cell factor 1;HCF N-terminal chain 1;HCF N-terminal chain 2;HCF N-terminal chain 3;HCF N-terminal chain 4;HCF N-terminal chain 5;HCF N-terminal chain 6;HCF C-terminal chain 1;HCF C-terminal chain 2;HCF C-terminal chain 3;HCF C-terminal chain 4;HCF C-terminal chain 5;HCF C-terminal chain 6	HCFC1	0.999957	45.3199	1.59683e-63	128.82	116.46	105.03	1;3	T	HKSGTVTVAQQAQVVTTVVGGVTKTITLVKS	X;X;X;X;X;X;X;X;X;X;X;X;X;X;X;GalT_UC1;GalT_UC1;X;X;X;X;X;GalT_UC1;X;X;X;X;X;X;X;X	XXPPPPPPPPPPPPPPPPPPPPPPXXXXXXX	SGTVTVAQQAQVVT(1)T(1)VVGGVT(1)K	S(-60.73)GT(-51.63)VT(-41.99)VAQQAQVVT(45.32)T(41.99)VVGGVT(95.34)K	14	4	0.30559	53934000	10940000	0	42995000	NaN	743	131	651	651	449	551;552;553	846;851	1913;1929;1930	846	1913	24434	851	1930	36728	851	1930	36728
P51610	652	P51610	Host cell factor 1;HCF N-terminal chain 1;HCF N-terminal chain 2;HCF N-terminal chain 3;HCF N-terminal chain 4;HCF N-terminal chain 5;HCF N-terminal chain 6;HCF C-terminal chain 1;HCF C-terminal chain 2;HCF C-terminal chain 3;HCF C-terminal chain 4;HCF C-terminal chain 5;HCF C-terminal chain 6	HCFC1	0.999921	41.9915	1.36841e-29	105.03	88.601	105.03	3	T	KSGTVTVAQQAQVVTTVVGGVTKTITLVKSP	X;X;X;X;X;X;X;X;X;X;X;X;X;X;GalT_UC1;GalT_UC1;X;X;X;X;X;GalT_UC1;X;X;X;X;X;X;X;X;X	XPPPPPPPPPPPPPPPPPPPPPPXXXXXXXX	SGTVTVAQQAQVVT(1)T(1)VVGGVT(1)K	S(-60.73)GT(-51.63)VT(-41.99)VAQQAQVVT(45.32)T(41.99)VVGGVT(95.34)K	15	4	0.30559	42995000	0	0	42995000	NaN	744	131	652	652	449	551;552;553	846	1913	846	1913	24434	846	1913	24434	846	1913	24434
P51610	658	P51610	Host cell factor 1;HCF N-terminal chain 1;HCF N-terminal chain 2;HCF N-terminal chain 3;HCF N-terminal chain 4;HCF N-terminal chain 5;HCF N-terminal chain 6;HCF C-terminal chain 1;HCF C-terminal chain 2;HCF C-terminal chain 3;HCF C-terminal chain 4;HCF C-terminal chain 5;HCF C-terminal chain 6	HCFC1	1	95.338	1.36841e-29	105.03	88.601	105.03	3	T	VAQQAQVVTTVVGGVTKTITLVKSPISVPGG	X;X;X;X;X;X;X;X;GalT_UC1;GalT_UC1;X;X;X;X;X;GalT_UC1;X;X;X;X;X;X;X;X;X;X;GalT_UC1;X;X;X;X	PPPPPPPPPPPPPPPPPXXXXXXXXXXXXXX	SGTVTVAQQAQVVT(1)T(1)VVGGVT(1)K	S(-60.73)GT(-51.63)VT(-41.99)VAQQAQVVT(45.32)T(41.99)VVGGVT(95.34)K	21	4	0.30559	42995000	0	0	42995000	NaN	745	131	658	658	449	551;552;553	846	1913	846	1913	24434	846	1913	24434	846	1913	24434
P51610	669	P51610	Host cell factor 1;HCF N-terminal chain 1;HCF N-terminal chain 2;HCF N-terminal chain 3;HCF N-terminal chain 4;HCF N-terminal chain 5;HCF N-terminal chain 6;HCF C-terminal chain 1;HCF C-terminal chain 2;HCF C-terminal chain 3;HCF C-terminal chain 4;HCF C-terminal chain 5;HCF C-terminal chain 6	HCFC1	0.911226	10.1134	1.17588e-230	203.39	181.72	203.39	1	S	VGGVTKTITLVKSPISVPGGSALISNLGKVM	X;X;X;X;GalT_UC1;X;X;X;X;X;X;X;X;X;X;GalT_UC1;X;X;X;X;X;X;X;X;X;X;X;X;X;X;X	XXXXXXXXXXXXPPPPPPPPPPPPPPPPPXX	S(0.089)PIS(0.911)VPGGSALISNLGK	S(-10.11)PIS(10.11)VPGGS(-96.28)ALIS(-147.37)NLGK	4	3	0.30074	10963000	10963000	0	0	NaN	201	131	669	669	485	593	910	2084;2085	910	2085	55855	910	2085	55855	910	2085	55855
P51610	685	P51610	Host cell factor 1;HCF N-terminal chain 1;HCF N-terminal chain 2;HCF N-terminal chain 3;HCF N-terminal chain 4;HCF N-terminal chain 5;HCF N-terminal chain 6;HCF C-terminal chain 1;HCF C-terminal chain 2;HCF C-terminal chain 3;HCF C-terminal chain 4;HCF C-terminal chain 5;HCF C-terminal chain 6	HCFC1	0.997736	26.4421	0	323.44	308.02	323.44	1	S	VPGGSALISNLGKVMSVVQTKPVQTSAVTGQ	X;X;X;X;X;X;X;X;X;X;X;X;X;X;X;GalT_UC1;X;X;X;X;X;X;X;X;GalT_UC1;X;X;X;X;X;X	XXXXXXXXXXXXXPPPPPPPPPPPPPPPPPP	VMS(0.998)VVQT(0.002)KPVQTSAVTGQASTGPVTQIIQTK	VMS(26.44)VVQT(-26.44)KPVQT(-81.79)S(-92.38)AVT(-133.07)GQAS(-188.78)T(-188.78)GPVT(-222.03)QIIQT(-287.45)K	3	4	0.31006	294870000	294870000	0	0	NaN	207	131	685	685	671	836	1309	3100;3101;3102;3103;3104;3105;3106;3107;3108	1309	3104	50822	1309	3104	50822	1309	3104	50822
P51610	694	P51610	Host cell factor 1;HCF N-terminal chain 1;HCF N-terminal chain 2;HCF N-terminal chain 3;HCF N-terminal chain 4;HCF N-terminal chain 5;HCF N-terminal chain 6;HCF C-terminal chain 1;HCF C-terminal chain 2;HCF C-terminal chain 3;HCF C-terminal chain 4;HCF C-terminal chain 5;HCF C-terminal chain 6	HCFC1	0.992308	21.1065	7.56033e-168	183.7	166.1	183.7	1	T	NLGKVMSVVQTKPVQTSAVTGQASTGPVTQI	X;X;X;X;X;X;X;X;X;X;X;X;X;X;X;GalT_UC1;X;X;X;X;X;X;X;X;X;X;X;X;X;X;X	XXXXPPPPPPPPPPPPPPPPPPPPPPPPPPP	PVQT(0.992)S(0.008)AVTGQASTGPVTQIIQTK	PVQT(21.11)S(-21.11)AVT(-65.46)GQAS(-127.37)T(-134.87)GPVT(-154.93)QIIQT(-173.71)K	4	3	0.10208	162190000	162190000	0	0	NaN	740	131	694	694	392;671	478;836	738;739;1310	1669;1670;1671;1672;1673;1674;3109;3110;3111;3112;3113	738	1672	42692	738	1672	42692	738	1672	42692
P51610	726	P51610	Host cell factor 1;HCF N-terminal chain 1;HCF N-terminal chain 2;HCF N-terminal chain 3;HCF N-terminal chain 4;HCF N-terminal chain 5;HCF N-terminal chain 6;HCF C-terminal chain 1;HCF C-terminal chain 2;HCF C-terminal chain 3;HCF C-terminal chain 4;HCF C-terminal chain 5;HCF C-terminal chain 6	HCFC1	0.997222	25.5688	9.85472e-157	173.25	156.59	173.25	1;2	T	QTKGPLPAGTILKLVTSADGKPTTIITTTQA	X;X;X;X;X;X;X;X;X;X;X;X;X;X;X;GalT_UC1;X;X;X;X;X;X;X;X;X;X;X;GalT_UC1;X;X;X	XXXXXXXXXXXXXPPPPPPPPPPPPPPPPPP	LVT(0.997)S(0.003)ADGKPTT(0.001)IIT(0.025)T(0.487)T(0.487)QASGAGTK	LVT(25.57)S(-25.57)ADGKPT(-49.87)T(-25.57)IIT(-12.94)T(0)T(0)QAS(-61.51)GAGT(-83.71)K	3	4	0.091919	79378000	12585000	66793000	0	NaN	734	131	726	726	309	378;379	592;593;594	1333;1334;1335;1336;1337;1338;1339;1340;1341	593	1338	18875	593	1338	18875	593	1338	18875
P51610	738	P51610	Host cell factor 1;HCF N-terminal chain 1;HCF N-terminal chain 2;HCF N-terminal chain 3;HCF N-terminal chain 4;HCF N-terminal chain 5;HCF N-terminal chain 6;HCF C-terminal chain 1;HCF C-terminal chain 2;HCF C-terminal chain 3;HCF C-terminal chain 4;HCF C-terminal chain 5;HCF C-terminal chain 6	HCFC1	0.777885	10.4273	9.85472e-157	173.25	156.59	113.53	2	T	KLVTSADGKPTTIITTTQASGAGTKPTILGI	X;X;X;GalT_UC1;X;X;X;X;X;X;X;X;X;X;X;GalT_UC1;X;X;X;X;X;X;X;X;X;X;X;X;X;X;X	XPPPPPPPPPPPPPPPPPPPPPPPPXXXXXX	LVT(0.991)S(0.009)ADGKPT(0.007)T(0.071)IIT(0.071)T(0.778)T(0.071)QAS(0.003)GAGTK	LVT(20.54)S(-20.54)ADGKPT(-20.54)T(-10.43)IIT(-10.43)T(10.43)T(-10.43)QAS(-23.99)GAGT(-33.88)K	15	5	-0.51861	35203000	0	35203000	0	NaN	736	131	738	738	309	378;379	592	1333;1334;1335	592	1334	18701	593	1338	18875	593	1338	18875
P51610	761	P51610	Host cell factor 1;HCF N-terminal chain 1;HCF N-terminal chain 2;HCF N-terminal chain 3;HCF N-terminal chain 4;HCF N-terminal chain 5;HCF N-terminal chain 6;HCF C-terminal chain 1;HCF C-terminal chain 2;HCF C-terminal chain 3;HCF C-terminal chain 4;HCF C-terminal chain 5;HCF C-terminal chain 6	HCFC1	0.878301	8.81724	1.10704e-241	205.52	189.89	82.651	1	T	TKPTILGISSVSPSTTKPGTTTIIKTIPMSA	X;X;X;X;X;X;X;X;X;X;X;X;X;X;X;GalT_UC1;X;X;X;X;X;X;X;X;X;GalT_UC1;X;X;X;X;X	XXPPPPPPPPPPPPPPPPPPPPPPPXXXXXX	PTILGISSVSPS(0.003)T(0.115)T(0.878)KPGT(0.003)TTIIK	PT(-41.13)ILGIS(-41.13)S(-37.6)VS(-32.88)PS(-25.36)T(-8.82)T(8.82)KPGT(-25.36)T(-33.06)T(-39.84)IIK	14	3	0.24869	21339000	21339000	0	0	NaN	739	131	761	761	386	471	728	1645;1646	728	1646	48256	729	1648	48284	729	1648	48284
P51610	771	P51610	Host cell factor 1;HCF N-terminal chain 1;HCF N-terminal chain 2;HCF N-terminal chain 3;HCF N-terminal chain 4;HCF N-terminal chain 5;HCF N-terminal chain 6;HCF C-terminal chain 1;HCF C-terminal chain 2;HCF C-terminal chain 3;HCF C-terminal chain 4;HCF C-terminal chain 5;HCF C-terminal chain 6	HCFC1	0.994814	22.8318	8.62183e-301	228.51	215.87	228.51	1	T	VSPSTTKPGTTTIIKTIPMSAIITQAGATGV	X;X;X;X;GalT_UC1;GalT_UC1;X;X;X;X;X;X;X;X;X;GalT_UC1;X;X;X;X;X;X;X;X;X;X;X;X;X;X;X	XXXXXXXXXXXXXXXPPPPPPPPPPPPPPPP	T(0.995)IPMS(0.005)AIITQAGATGVTSSPGIK	T(22.83)IPMS(-22.83)AIIT(-55.48)QAGAT(-164.51)GVT(-202.05)S(-206.51)S(-210.61)PGIK	1	3	0.34992	502380000	502380000	0	0	NaN	752	131	771	771	570	706;707	1121;1122;1123	2605;2606;2607;2608;2609;2610;2611;2612;2613;2614;2615;2616;2617;2618;2619;2620;2621;2622;2623;2624	1121	2608	57518	1121	2608	57518	1121	2608	57518
P51610	779	P51610	Host cell factor 1;HCF N-terminal chain 1;HCF N-terminal chain 2;HCF N-terminal chain 3;HCF N-terminal chain 4;HCF N-terminal chain 5;HCF N-terminal chain 6;HCF C-terminal chain 1;HCF C-terminal chain 2;HCF C-terminal chain 3;HCF C-terminal chain 4;HCF C-terminal chain 5;HCF C-terminal chain 6	HCFC1	0.967747	15.5623	6.06929e-39	112.91	92.713	112.91	2	T	GTTTIIKTIPMSAIITQAGATGVTSSPGIKS	X;X;X;X;X;X;X;X;X;X;X;X;X;X;X;GalT_UC1;X;X;X;X;X;X;X;GalT_UC1;X;X;X;X;X;X;X	XXXXXXXPPPPPPPPPPPPPPPPPPPPPPPX	T(0.005)IPMS(0.027)AIIT(0.968)QAGAT(0.027)GVT(0.967)S(0.005)SPGIK	T(-23)IPMS(-15.56)AIIT(15.56)QAGAT(-15.56)GVT(15.56)S(-23)S(-33.43)PGIK	9	4	0.087093	93758000	0	93758000	0	NaN	753	131	779	779	570	706;707	1120	2601;2602;2603;2604	1120	2602	47110	1120	2602	47110	1120	2602	47110
P51610	787	P51610	Host cell factor 1;HCF N-terminal chain 1;HCF N-terminal chain 2;HCF N-terminal chain 3;HCF N-terminal chain 4;HCF N-terminal chain 5;HCF N-terminal chain 6;HCF C-terminal chain 1;HCF C-terminal chain 2;HCF C-terminal chain 3;HCF C-terminal chain 4;HCF C-terminal chain 5;HCF C-terminal chain 6	HCFC1	0.967275	15.5623	6.06929e-39	112.91	92.713	112.91	2	T	IPMSAIITQAGATGVTSSPGIKSPITIITTK	X;X;X;X;X;X;X;GalT_UC1;X;X;X;X;X;X;X;GalT_UC1;X;X;X;X;X;X;X;X;X;X;X;X;X;GalT_UC1;X	PPPPPPPPPPPPPPPPPPPPPPXXXXXXXXX	T(0.005)IPMS(0.027)AIIT(0.968)QAGAT(0.027)GVT(0.967)S(0.005)SPGIK	T(-23)IPMS(-15.56)AIIT(15.56)QAGAT(-15.56)GVT(15.56)S(-23)S(-33.43)PGIK	17	4	0.087093	93758000	0	93758000	0	NaN	754	131	787	787	570	706;707	1120	2601;2602;2603;2604	1120	2602	47110	1120	2602	47110	1120	2602	47110
P51610	801	P51610	Host cell factor 1;HCF N-terminal chain 1;HCF N-terminal chain 2;HCF N-terminal chain 3;HCF N-terminal chain 4;HCF N-terminal chain 5;HCF N-terminal chain 6;HCF C-terminal chain 1;HCF C-terminal chain 2;HCF C-terminal chain 3;HCF C-terminal chain 4;HCF C-terminal chain 5;HCF C-terminal chain 6	HCFC1	0.997463	25.9465	1.72422e-19	114.89	88.912	114.89	1	T	VTSSPGIKSPITIITTKVMTSGTGAPAKIIT	X;GalT_UC1;X;X;X;X;X;X;X;X;X;X;X;X;X;GalT_UC1;X;X;X;X;X;X;X;X;X;X;X;X;X;X;X	XXXXXXXXPPPPPPPPPXXXXXXXXXXXXXX	SPITIIT(0.003)T(0.997)K	S(-93.54)PIT(-81.7)IIT(-25.95)T(25.95)K	8	3	0.13921	2982400000	2982400000	0	0	7.9156	746	131	801	801	486	595	913;914	2090;2091;2092;2093;2094;2095;2096;2097;2098;2099;2100;2101	914	2092	20851	914	2092	20851	914	2092	20851
P51610	831	P51610	Host cell factor 1;HCF N-terminal chain 1;HCF N-terminal chain 2;HCF N-terminal chain 3;HCF N-terminal chain 4;HCF N-terminal chain 5;HCF N-terminal chain 6;HCF C-terminal chain 1;HCF C-terminal chain 2;HCF C-terminal chain 3;HCF C-terminal chain 4;HCF C-terminal chain 5;HCF C-terminal chain 6	HCFC1	1	78.6413	2.13815e-54	112.44	85.102	112.44		T	TAVPKIATGHGQQGVTQVVLKGAPGQPGTIL	X;X;X;X;X;X;X;X;X;X;X;X;X;X;X;GalT_UC1;X;X;X;X;X;X;X;X;X;X;X;X;X;X;X	XXXXXPPPPPPPPPPPPPPPPXXXXXXXXXX	IATGHGQQGVT(1)QVVLK	IAT(-78.64)GHGQQGVT(78.64)QVVLK	11	4	0.72264	17660000	17660000	0	0	NaN	730	131	831	831	199	242	379	893	379	893	14164	379	893	14164	379	893	14164
P51610	858	P51610	Host cell factor 1;HCF N-terminal chain 1;HCF N-terminal chain 2;HCF N-terminal chain 3;HCF N-terminal chain 4;HCF N-terminal chain 5;HCF N-terminal chain 6;HCF C-terminal chain 1;HCF C-terminal chain 2;HCF C-terminal chain 3;HCF C-terminal chain 4;HCF C-terminal chain 5;HCF C-terminal chain 6	HCFC1	0.806235	6.22805	5.54779e-22	84.14	67.712	84.14	1	T	GTILRTVPMGGVRLVTPVTVSAVKPAVTTLV	X;X;X;X;X;X;X;X;X;X;X;X;X;X;X;GalT_UC1;X;X;X;X;X;X;X;X;X;X;X;GalT_UC1;X;X;X	XXXXXXXXXXXXXPPPPPPPPPPPPPPPPPP	LVT(0.806)PVT(0.192)VS(0.002)AVKPAVTTLVVK	LVT(6.23)PVT(-6.23)VS(-27)AVKPAVT(-61.66)T(-61.66)LVVK	3	3	-1.2245	0	0	0	0	0	731	131	858	858	307;308	374;377	591	1332	591	1332	53385	591	1332	53385	591	1332	53385
P51610	861	P51610	Host cell factor 1;HCF N-terminal chain 1;HCF N-terminal chain 2;HCF N-terminal chain 3;HCF N-terminal chain 4;HCF N-terminal chain 5;HCF N-terminal chain 6;HCF C-terminal chain 1;HCF C-terminal chain 2;HCF C-terminal chain 3;HCF C-terminal chain 4;HCF C-terminal chain 5;HCF C-terminal chain 6	HCFC1	0.972725	18.5326	0.000159112	73.885	55.564	73.885	1	T	LRTVPMGGVRLVTPVTVSAVKPAVTTLVVKG	X;X;X;X;X;X;X;X;X;X;X;X;X;X;X;GalT_UC1;X;X;X;X;X;X;X;X;GalT_UC1;X;X;X;X;X;X	XXXXXXXXXXPPPPPPPPPPPXXXXXXXXXX	LVT(0.014)PVT(0.973)VS(0.014)AVK	LVT(-18.53)PVT(18.53)VS(-18.53)AVK	6	3	0.08156	100640000	100640000	0	0	13.351	732	131	861	861	307;308	374;377	585	1325;1326	585	1325	23488	585	1325	23488	585	1325	23488
P51610	870	P51610	Host cell factor 1;HCF N-terminal chain 1;HCF N-terminal chain 2;HCF N-terminal chain 3;HCF N-terminal chain 4;HCF N-terminal chain 5;HCF N-terminal chain 6;HCF C-terminal chain 1;HCF C-terminal chain 2;HCF C-terminal chain 3;HCF C-terminal chain 4;HCF C-terminal chain 5;HCF C-terminal chain 6	HCFC1	0.992266	21.0824	0.0021585	76.064	41.343	76.064	1	T	RLVTPVTVSAVKPAVTTLVVKGTTGVTTLGT	X;X;X;X;X;X;GalT_UC1;X;X;X;X;X;X;X;X;GalT_UC1;X;X;X;X;X;X;X;X;X;X;X;X;X;X;X	XXXXXXXXXXXXPPPPPPPPPXXXXXXXXXX	PAVT(0.992)T(0.008)LVVK	PAVT(21.08)T(-21.08)LVVK	4	3	0.090678	5558700	5558700	0	0	NaN	733	131	870	870	308;356	377;434	678	1511	678	1511	18583	678	1511	18583	678	1511	18583
P51610	1058	P51610	Host cell factor 1;HCF N-terminal chain 1;HCF N-terminal chain 2;HCF N-terminal chain 3;HCF N-terminal chain 4;HCF N-terminal chain 5;HCF N-terminal chain 6;HCF C-terminal chain 1;HCF C-terminal chain 2;HCF C-terminal chain 3;HCF C-terminal chain 4;HCF C-terminal chain 5;HCF C-terminal chain 6	HCFC1	0.851123	8.25546	1.06867e-08	78.234	68.313	78.234	1	S	PTQVQFVCDRQEAAASLVTSTVGQQNGSVVR	X;X;X;X;X;X;X;X;X;X;X;X;X;X;X;GalT_UC1;X;X;X;X;X;X;X;X;X;X;X;X;X;X;X	XXXXXXXXXXPPPPPPPPPPPPPPPPPPPPP	QEAAAS(0.851)LVT(0.127)S(0.021)TVGQQNGSVVR	QEAAAS(8.26)LVT(-8.26)S(-16.03)T(-32.63)VGQQNGS(-72.45)VVR	6	3	-0.4356	38965000	38965000	0	0	NaN	199	131	1058	1058	403	491	755;756	1704;1705;1706	756	1706	33299	756	1706	33299	756	1706	33299
P51610	1150	P51610	Host cell factor 1;HCF N-terminal chain 1;HCF N-terminal chain 2;HCF N-terminal chain 3;HCF N-terminal chain 4;HCF N-terminal chain 5;HCF N-terminal chain 6;HCF C-terminal chain 1;HCF C-terminal chain 2;HCF C-terminal chain 3;HCF C-terminal chain 4;HCF C-terminal chain 5;HCF C-terminal chain 6	HCFC1	1	83.6901	1.19906e-128	174.42	126.6	174.42	1	S	ARRACAAGTPAVIRISVATGALEAAQGSKSQ	X;X;X;X;X;X;X;X;X;X;X;X;X;X;X;GalT_UC1;X;X;X;X;X;X;X;X;X;X;X;X;X;X;X	XXXXXXXXXXXXXXPPPPPPPPPPPPPPPXX	IS(1)VATGALEAAQGSK	IS(83.69)VAT(-83.69)GALEAAQGS(-164.5)K	2	3	0.32662	33678000	33678000	0	0	NaN	198	131	1150	1150	232	284	454	1069;1070	454	1070	23085	454	1070	23085	454	1070	23085
P51610	1386	P51610	Host cell factor 1;HCF N-terminal chain 1;HCF N-terminal chain 2;HCF N-terminal chain 3;HCF N-terminal chain 4;HCF N-terminal chain 5;HCF N-terminal chain 6;HCF C-terminal chain 1;HCF C-terminal chain 2;HCF C-terminal chain 3;HCF C-terminal chain 4;HCF C-terminal chain 5;HCF C-terminal chain 6	HCFC1	0.882503	8.75688	5.6548e-124	157.28	143.39	157.28	1	T	VSVGALLPDATSSHRTVESGLEVAAAPSVTP	X;X;X;X;X;X;X;X;X;X;X;X;X;X;X;GalT_UC1;X;X;X;X;X;X;X;X;X;X;X;X;X;X;X	XXXXXXXXXXXXXXXPPPPPPPPPPPPPPPP	T(0.883)VES(0.117)GLEVAAAPSVTPQAGTALLAPFPTQR	T(8.76)VES(-8.76)GLEVAAAPS(-78.85)VT(-98.34)PQAGT(-125.71)ALLAPFPT(-156.13)QR	1	4	0.43403	3303500	3303500	0	0	NaN	759	131	1386	1386	636	792	1249	2945;2946	1249	2946	82492	1249	2946	82492	1249	2946	82492
P51610	1497	P51610	Host cell factor 1;HCF N-terminal chain 1;HCF N-terminal chain 2;HCF N-terminal chain 3;HCF N-terminal chain 4;HCF N-terminal chain 5;HCF N-terminal chain 6;HCF C-terminal chain 1;HCF C-terminal chain 2;HCF C-terminal chain 3;HCF C-terminal chain 4;HCF C-terminal chain 5;HCF C-terminal chain 6	HCFC1	0.82149	6.93826	4.43972e-14	64.289	58.617	64.289	1	S	RAVTTVTQSTPVPGPSVPPPEELQVSPGPRQ	X;X;X;X;X;X;X;X;X;X;X;X;X;X;X;GalT_UC1;X;X;X;X;X;X;X;X;X;X;X;X;X;X;X	XPPPPPPPPPPPPPPPPPPPPPPPPPPPPPX	AVTTVT(0.001)QS(0.01)T(0.166)PVPGPS(0.821)VPPPEELQVS(0.001)PGPR	AVT(-40.4)T(-40.4)VT(-30.37)QS(-19.16)T(-6.94)PVPGPS(6.94)VPPPEELQVS(-27.71)PGPR	15	3	-0.18069	74270000	74270000	0	0	NaN	195	131	1497	1497	70	93	154	415;416	154	415	58980	154	415	58980	154	415	58980
P52594	291	P52594	Arf-GAP domain and FG repeat-containing protein 1	AGFG1	0.960144	13.827	0	334.47	321.41	334.47	1	S	ASVNANFAHFDNFPKSSSADFGTFNTSQSHQ	X;X;X;X;X;X;X;X;X;X;X;X;X;X;X;GalT_UC1;X;X;X;X;X;X;X;X;X;X;X;X;X;X;X	XXXXXXXXXXXXXXXPPPPPPPPPPPPPPPP	S(0.96)S(0.04)SADFGTFNTSQSHQTASAVSK	S(13.83)S(-13.83)S(-40.88)ADFGT(-185.38)FNT(-235.09)S(-249.42)QS(-262.83)HQT(-286.74)AS(-306.4)AVS(-320.07)K	1	4	-0.019073	77161000	77161000	0	0	4.9132	210	132	291	291	509	625	953	2174;2175;2176;2177;2178;2179	953	2175	17216	953	2175	17216	954	2181	17278
P52594	302	P52594	Arf-GAP domain and FG repeat-containing protein 1	AGFG1	0.922985	11.1242	0	231.71	219.92	231.71	1	S	NFPKSSSADFGTFNTSQSHQTASAVSKVSTN	X;X;X;X;X;X;X;X;X;X;X;X;X;X;X;GalT_UC1;X;X;X;X;X;X;X;X;X;X;X;X;X;X;X	XXXXPPPPPPPPPPPPPPPPPPPPPPPXXXX	SSSADFGTFNT(0.071)S(0.923)QS(0.006)HQTASAVSK	S(-110.81)S(-101.83)S(-101.83)ADFGT(-53.57)FNT(-11.12)S(11.12)QS(-22.05)HQT(-63.66)AS(-92.63)AVS(-127.88)K	12	4	0.61226	45196000	45196000	0	0	2.8778	212	132	302	302	509	625	952	2172;2173	952	2173	16665	952	2173	16665	952	2173	16665
P52594	362	P52594	Arf-GAP domain and FG repeat-containing protein 1	AGFG1	0.999905	40.2435	1.85308e-180	187.63	171.45	187.63	1	S	SGFGTTGKAPVGSVVSVPSQSSASSDKYAAL	X;X;X;X;X;X;X;X;X;X;X;X;X;X;X;GalT_UC1;X;X;X;X;X;X;X;X;X;X;X;X;X;X;X	XXXXXXXXPPPPPPPPPPPPPPPPPPPXXXX	APVGSVVS(1)VPSQSSASSDK	APVGS(-40.24)VVS(40.24)VPS(-63.03)QS(-100.42)S(-117.09)AS(-142.52)S(-146.07)DK	8	3	-0.14541	181840000	181840000	0	0	12.478	208	132	362	362	28	33	54	162;163;164;165;166	54	165	20834	54	165	20834	54	165	20834
P52594	367	P52594	Arf-GAP domain and FG repeat-containing protein 1	AGFG1	0.99917	31.2274	6.00771e-159	185.95	185.95	185.95	1	S	TGKAPVGSVVSVPSQSSASSDKYAALAELDS	X;X;X;X;X;X;X;X;X;X;X;X;X;X;X;GalT_UC1;X;X;X;X;X;X;X;X;X;X;X;X;X;X;X	XXXPPPPPPPPPPPPPPPPPPPXXXXXXXXX	APVGSVVSVPSQS(0.999)S(0.001)ASSDK	APVGS(-117.47)VVS(-78.26)VPS(-41.14)QS(31.23)S(-31.23)AS(-69.37)S(-71.26)DK	13	3	0.40552	285680000	285680000	0	0	19.604	209	132	367	367	28	33	53	151;152;153;154;155;156;157;158;159;160;161	53	156	19835	53	156	19835	53	156	19835
P52948	264	P52948	Nuclear pore complex protein Nup98-Nup96;Nuclear pore complex protein Nup98;Nuclear pore complex protein Nup96	NUP98	0.881056	11.8606	0	369.71	354.79	369.71	1	T	GFAYGQNKTAFGTSTTGFGTNPGGLFGQQNQ	X;X;X;X;X;X;X;X;X;X;X;X;X;X;X;GalT_UC1;X;X;X;X;X;X;X;X;X;X;X;X;X;X;X	XXXXXXXXPPPPPPPPPPPPPPPPPPPPPPP	TAFGTS(0.004)T(0.057)T(0.881)GFGT(0.057)NPGGLFGQQNQQTTSLFSK	T(-68.97)AFGT(-35.15)S(-23.58)T(-11.86)T(11.86)GFGT(-11.86)NPGGLFGQQNQQT(-223.54)T(-247.25)S(-269.33)LFS(-307.1)K	8	4	0.12354	39078000	39078000	0	0	NaN	767	133	264	264	545	678	1081	2502;2503;2504;2505;2506;2507;2508;2509	1081	2505	74592	1081	2505	74592	1081	2505	74592
P52948	281	P52948	Nuclear pore complex protein Nup98-Nup96;Nuclear pore complex protein Nup98;Nuclear pore complex protein Nup96	NUP98	0.873254	9.34623	3.90433e-72	134.66	120.79	106.67	1	T	FGTNPGGLFGQQNQQTTSLFSKPFGQATTTQ	X;X;X;X;X;X;X;X;X;X;X;X;X;X;X;GalT_UC1;X;X;X;X;X;X;X;X;X;X;X;X;X;X;X	PPPPPPPPPPPPPPPPPPPPPPXXXXXXXXX	TAFGTSTTGFGTNPGGLFGQQNQQT(0.873)T(0.102)S(0.013)LFS(0.013)K	T(-96.99)AFGT(-90.2)S(-90.2)T(-86.17)T(-81.76)GFGT(-60.73)NPGGLFGQQNQQT(9.35)T(-9.35)S(-18.4)LFS(-18.4)K	25	3	-0.31339	26274000	26274000	0	0	NaN	768	133	281	281	545	678	1079;1080	2498;2499;2500;2501	1080	2501	74182	1079	2499	74171	1079	2499	74171
P52948	1064	P52948	Nuclear pore complex protein Nup98-Nup96;Nuclear pore complex protein Nup98;Nuclear pore complex protein Nup96	NUP98	0.99898	30.7294	2.63999e-12	89.403	74.82	89.403	1	S	LQSKFTSGAFLSPSVSVQECRTPRAASLMNI	X;X;X;X;X;X;X;X;X;X;X;X;X;X;X;GalT_UC1;X;X;X;X;X;X;X;X;X;X;X;X;X;X;X	XXXXPPPPPPPPPPPPPPPPPXXXXXXXXXX	FTSGAFLSPS(0.001)VS(0.999)VQECR	FT(-41)S(-47.86)GAFLS(-41)PS(-30.73)VS(30.73)VQECR	12	3	-0.048741	39549000	39549000	0	0	NaN	213	133	1064	1064	144	180	289	714;715	289	715	44750	289	715	44750	289	715	44750
P54253	82	P54253	Ataxin-1	ATXN1	0.990018	19.9641	7.22607e-39	118.87	101.8	118.87	1	S	VELGLQQGIGLHKALSTGLDYSPPSAPRSVP	X;X;X;X;X;X;X;X;X;X;X;X;X;X;X;GalT_UC1;X;X;X;X;X;X;X;X;X;X;X;X;X;X;X	XXXXXXXXXXXXXPPPPPPPPPPPPPPPXXX	ALS(0.99)T(0.01)GLDYSPPSAPR	ALS(19.96)T(-19.96)GLDYS(-94.64)PPS(-102.98)APR	3	3	-0.42371	7494100	7494100	0	0	NaN	215	134	82	82	20	22	34	91;92;93;94	34	92	33504	34	92	33504	34	92	33504
P55197	266	P55197	Protein AF-10	MLLT10	0.936203	14.7302	2.83089e-10	86.288	63.813	86.288	1	T	PSPALVPSLTVTTEKTYTSTSNNSISGSLKR	X;X;X;X;X;X;X;X;X;X;X;X;X;X;X;GalT_UC1;X;X;X;X;X;X;X;X;X;X;X;X;X;X;X	XXXXXXXXXXXXXXXPPPPPPPPPPPPPPPX	T(0.936)YT(0.032)S(0.032)T(0.001)SNNSISGSLK	T(14.73)YT(-14.73)S(-14.73)T(-31.09)S(-41.75)NNS(-68.99)IS(-68.86)GS(-77.01)LK	1	3	-0.36309	7146900	7146900	0	0	NaN	769	136	266	266	648	807	1268	2987	1268	2987	11354	1268	2987	11354	1268	2987	11354
P55265	391	P55265	Double-stranded RNA-specific adenosine deaminase	ADAR	0.916333	11.639	1.50332e-07	52.321	43.157	52.321	1	T	APAAIPETKRNAEFLTCNIPTSNASNNMVTT	X;X;X;X;X;X;X;X;X;X;X;X;X;X;X;GalT_UC1;X;X;X;X;X;X;X;X;X;X;X;X;X;X;X	XXXXXXXXXXPPPPPPPPPPPPPPPPPPPPP	NAEFLT(0.916)CNIPT(0.063)S(0.02)NAS(0.001)NNMVTTEK	NAEFLT(11.64)CNIPT(-11.64)S(-16.66)NAS(-30.06)NNMVT(-40.47)T(-40.24)EK	6	3	-0.80352	29449000	29449000	0	0	NaN	772	138	391	391	320	393	614	1372	614	1372	46922	614	1372	46922	614	1372	46922
P78312	708	P78312	Protein FAM193A	FAM193A	0.846056	8.51586	0.000603085	68.355	53.09	68.355	1	T	HLANLAAPSFPKTATTTPGFVDTRKSFCPAP	X;X;X;X;X;X;X;X;X;X;X;X;X;X;X;GalT_UC1;X;X;X;X;X;X;X;X;X;X;X;X;X;X;X	XXXXXXXXXXXXPPPPPPPPPPPPXXXXXXX	T(0.015)AT(0.119)T(0.846)T(0.019)PGFVDTR	T(-17.41)AT(-8.52)T(8.52)T(-16.38)PGFVDT(-49.82)R	4	3	0.063467	63523000	63523000	0	0	NaN	773	144	708	708	550	683	1089	2525;2526	1089	2526	15413	1089	2526	15413	1089	2526	15413
P78337	188	P78337	Pituitary homeobox 1	PITX1	0.999921	41.9733	0.00674285	51.927	36.539	51.927	1	S	DVYAAGYSYNNWAAKSLAPAPLSTKSFTFFN	X;X;X;X;X;X;X;X;X;X;X;X;X;X;X;GalT_UC1;X;X;X;X;X;X;X;X;X;X;X;X;X;X;X	XXXXXXXXXXXXXXXPPPPPPPPPPXXXXXX	S(1)LAPAPLSTK	S(41.97)LAPAPLS(-41.97)T(-48.16)K	1	3	0.2418	3837000	3837000	0	0	NaN	222	145	188	188	460	566	877	2008	877	2008	13270	877	2008	13270	877	2008	13270
P78337	196	P78337	Pituitary homeobox 1	PITX1	0.900506	9.57743	0.0122313	50.292	29.422	50.292	1	T	YNNWAAKSLAPAPLSTKSFTFFNSMSPLSSQ	X;X;X;X;X;X;X;X;X;X;X;X;X;X;X;GalT_UC1;X;X;X;X;X;X;X;X;X;X;X;X;X;X;X	XXXXXXXPPPPPPPPPPXXXXXXXXXXXXXX	SLAPAPLS(0.099)T(0.901)K	S(-35.73)LAPAPLS(-9.58)T(9.58)K	9	2	-0.035605	7656200	7656200	0	0	NaN	774	145	196	196	460	566	878	2009	878	2009	15630	878	2009	15630	878	2009	15630
P78344	506	P78344	Eukaryotic translation initiation factor 4 gamma 2	EIF4G2	0.848382	7.6772	0.0067282	49.298	39.481	49.298	1	T	QPQITMIPPSAQPPRTQTPPLGQTPQLGLKT	X;X;X;X;X;X;X;X;X;X;X;X;X;X;X;GalT_UC1;X;X;X;X;X;X;X;X;X;X;X;X;X;X;X	XXXXXXXXXXXXXXXPPPPPPPPPPPPPPPX	T(0.848)QT(0.145)PPLGQT(0.007)PQLGLK	T(7.68)QT(-7.68)PPLGQT(-20.97)PQLGLK	1	3	0.0088012	53332000	53332000	0	0	NaN	775	146	506	506	607	755	1196	2833;2834	1196	2834	37225	1196	2834	37225	1196	2834	37225
P82909	37	P82909	28S ribosomal protein S36, mitochondrial	MRPS36	1	100.878	6.81154e-13	100.88	79.12	100.88	1	S	LIRFPDRRDNPKPNVSEALRSAGLPSHSSVI	X;X;X;X;X;X;X;X;X;X;X;X;X;X;X;GalT_UC1;X;X;X;X;X;X;X;X;X;X;X;X;X;X;X	XXXXXXXXPPPPPPPPPPPPXXXXXXXXXXX	DNPKPNVS(1)EALR	DNPKPNVS(100.88)EALR	8	3	-0.72415	19420000	19420000	0	0	NaN	223	147	37	37	84	107	173	447	173	447	10378	173	447	10378	173	447	10378
P85037	662	P85037	Forkhead box protein K1	FOXK1	1	106.115	0	295.73	279.14	295.73	1	T	QLLATQASSSAPVVVTRVCEVGPKEPAAAVA	X;X;X;X;X;X;X;X;X;X;X;X;X;X;X;GalT_UC1;X;X;X;X;X;X;X;X;X;X;X;X;X;X;X	PPPPPPPPPPPPPPPPPXXXXXXXXXXXXXX	HAVPTNSLAGNAYALTSPLQLLATQASSSAPVVVT(1)R	HAVPT(-274.88)NS(-260.69)LAGNAYALT(-179.53)S(-164.36)PLQLLAT(-164.36)QAS(-140.35)S(-123.54)S(-106.11)APVVVT(106.11)R	35	4	0.85085	139320000	139320000	0	0	NaN	780	148	662	662	184	225	349	824;825	349	825	91059	349	825	91059	349	825	91059
P85037	679	P85037	Forkhead box protein K1	FOXK1	0.942071	9.89269	0	317.99	294.14	100.21	2	T	VCEVGPKEPAAAVAATATTTPATATTASASA	X;X;X;X;X;X;X;X;X;X;X;X;X;X;X;GalT_UC1;X;GalT_UC1;GalT_UC1;X;X;X;X;X;X;X;X;X;X;X;X	XXXXXXXPPPPPPPPPPPPPPPPPPPPPPPP	EPAAAVAAT(0.942)AT(0.497)T(0.497)T(0.056)PAT(0.007)AT(0.001)TASASASSTGEPEVK	EPAAAVAAT(9.89)AT(0)T(0)T(-9.89)PAT(-19.46)AT(-28.67)T(-37.53)AS(-54.03)AS(-68.74)AS(-81.3)S(-86.64)T(-86.64)GEPEVK	9	3	0.51281	67872000	0	67872000	0	NaN	776	148	679	679	110	137;138	220	535;536	220	536	27381	221	538	34472	221	538	34472
Q01082	2297	Q01082	Spectrin beta chain, non-erythrocytic 1	SPTBN1	0.999975	47.9772	1.70039e-141	178.59	172.99	136.79	1	T	GNEYLFQAKDDEEMNTWIQAISSAISSDKHE	X;X;X;X;X;X;X;X;X;X;X;X;X;X;X;GalT_UC1;X;X;X;X;X;X;X;X;X;X;X;X;X;X;X	XXXXXXXXXPPPPPPPPPPPPPPPPPPPPPP	DDEEMNT(1)WIQAISSAISSDKHEVSASTQSTPASSR	DDEEMNT(47.98)WIQAIS(-47.98)S(-50.6)AIS(-68.49)S(-74.2)DKHEVS(-93.38)AS(-92.61)T(-92.61)QS(-92.61)T(-92.61)PAS(-89.75)S(-90.44)R	7	4	0.077718	145350000	145350000	0	0	NaN	785	150	2297	2297	75	98	161;162	425;426;427;428;429	162	429	86815	161	425	86951	161	425	86951
Q01082	2324	Q01082	Spectrin beta chain, non-erythrocytic 1	SPTBN1	0.934436	11.9627	0	246.08	185.29	109.42	1	S	DKHEVSASTQSTPASSRAQTLPTSVVTITSE	X;X;X;X;X;X;X;X;X;X;X;X;X;X;X;GalT_UC1;X;X;X;X;X;X;X;X;X;X;X;X;X;X;X	XXPPPPPPPPPPPPPPPXXXXXXXXXXXXXX	HEVSASTQS(0.002)T(0.004)PAS(0.059)S(0.934)R	HEVS(-87.36)AS(-56.18)T(-46.95)QS(-27)T(-23.46)PAS(-11.96)S(11.96)R	14	3	0.2022	560140000	560140000	0	0	NaN	227	150	2324	2324	75;185	98;226	350;351;353	826;827;828;829;830;831;832;833;834;835;836;837;838;839;842	353	842	4829	350	827	3750	350	827	3750
Q01167	424	Q01167	Forkhead box protein K2	FOXK2	0.991745	21.1848	1.00775e-06	49.089	44.902	49.089	1	S	AQPKLAVIQEARFAQSAPGSPLSSQPVLITV	X;X;X;X;X;X;X;X;X;X;X;X;X;X;X;GalT_UC1;X;X;X;X;X;X;X;X;X;X;X;X;X;X;X	XXXXXXXXXXXXPPPPPPPPPPPPPPPPPPP	FAQS(0.992)APGS(0.008)PLS(0.001)SQPVLITVQR	FAQS(21.18)APGS(-21.18)PLS(-32.79)S(-37.79)QPVLIT(-47.2)VQR	4	3	-0.78017	7544300	7544300	0	0	NaN	228	151	424	424	126	155	250	612	250	612	55607	250	612	55607	250	612	55607
Q02086	187	Q02086	Transcription factor Sp2	SP2	0.934459	11.5429	1.84234e-240	191.79	160.35	191.79		S	SSHKPVPIKPAPIQKSSTTTTPVQSGANVVK	X;X;X;X;X;X;X;X;X;X;X;X;X;X;X;GalT_UC1;X;X;X;X;X;X;X;X;X;X;X;X;X;X;X	XXXXXXXXXXXXXXXPPPPPPPPPPPPPPPP	S(0.934)S(0.066)TTTTPVQSGANVVK	S(11.54)S(-11.54)T(-44.46)T(-54.85)T(-79.35)T(-98.44)PVQS(-145.92)GANVVK	1	3	0.44702	23382000	23382000	0	0	NaN	232	155	187	187	515	636	973	2222	973	2222	10385	973	2222	10385	973	2222	10385
Q03164	3050	Q03164	Histone-lysine N-methyltransferase 2A;MLL cleavage product N320;MLL cleavage product C180	KMT2A	0.911155	10.1102	5.50031e-191	181.69	168.07	181.69	1	S	VSPTVPIQNQKYVPNSTDSPGPSQISNAAVQ	X;X;X;X;X;X;X;X;X;X;X;X;X;X;X;GalT_UC1;X;X;X;X;X;X;X;X;X;X;X;X;X;X;X	XXXXXXXXXXXPPPPPPPPPPPPPPPPPPPP	YVPNS(0.911)T(0.089)DSPGPSQISNAAVQTTPPHLKPATEK	YVPNS(10.11)T(-10.11)DS(-48.59)PGPS(-70.75)QIS(-88.48)NAAVQT(-114.9)T(-115.25)PPHLKPAT(-144.93)EK	5	5	0.16417	30228000	30228000	0	0	NaN	233	157	3050	3050	729	902	1399	3313;3314;3315;3316	1399	3316	35471	1399	3316	35471	1399	3316	35471
Q04637	61	Q04637	Eukaryotic translation initiation factor 4 gamma 1	EIF4G1	0.927225	11.3259	0.0061429	52.725	35.025	52.725	1	S	QPRQHFYPSRAQPPSSAASRVQSAAPARPGP	X;X;X;X;X;X;X;X;X;X;X;X;X;X;X;GalT_UC1;X;X;X;X;X;X;X;X;X;X;X;X;X;X;X	XXXXXXXXXXPPPPPPPPPPXXXXXXXXXXX	AQPPS(0.068)S(0.927)AAS(0.004)R	AQPPS(-11.33)S(11.33)AAS(-23.19)R	6	3	-0.10504	173660000	173660000	0	0	NaN	234	158	61	61	32	40	62	182;183;184;185;186	62	182	4078	62	182	4078	62	182	4078
Q04726	332	Q04726	Transducin-like enhancer protein 3	TLE3	0.969653	15.3377	2.7896e-30	114.24	87.234	114.24	1	S	SNTPTPRNDAPTPGTSTTPGLRSMPGKPPGM	X;X;X;X;X;X;X;X;X;X;X;X;X;X;X;GalT_UC1;X;X;X;X;X;X;X;X;X;X;X;X;X;X;X	XXXXXXXPPPPPPPPPPPPPPPXXXXXXXXX	NDAPTPGT(0.002)S(0.97)T(0.028)TPGLR	NDAPT(-44.89)PGT(-27.95)S(15.34)T(-15.34)T(-33.93)PGLR	9	3	1.7351	47949000	47949000	0	0	NaN	235	159	332	332	326	400	624	1391;1392	624	1392	14484	624	1392	14484	624	1392	14484
Q04726	333	Q04726	Transducin-like enhancer protein 3	TLE3	0.82404	7.59333	3.01148e-09	74.78	54.784	74.78		T	NTPTPRNDAPTPGTSTTPGLRSMPGKPPGMD	X;X;X;X;X;X;X;X;X;X;X;X;X;X;X;GalT_UC1;X;X;X;X;X;X;X;X;X;X;X;X;X;X;X	XXXXXXPPPPPPPPPPPPPPPXXXXXXXXXX	NDAPTPGT(0.002)S(0.143)T(0.824)T(0.031)PGLR	NDAPT(-34.82)PGT(-26.79)S(-7.59)T(7.59)T(-14.31)PGLR	10	3	0.44151	10400000	10400000	0	0	NaN	787	159	333	333	326	400	625	1393	625	1393	14785	625	1393	14785	625	1393	14785
Q04727	330	Q04727	Transducin-like enhancer protein 4	TLE4	1	80.2337	0	348.02	348.02	348.02	1	T	KSTTPVSKSNTPTPRTDAPTPGSNSTPGLRP	X;X;X;X;X;X;X;X;X;X;X;X;X;X;X;GalT_UC1;X;X;X;X;X;X;X;X;X;X;X;X;X;X;X	XXXXXXXXXXXXXXXPPPPPPPPPPPPPPPP	T(1)DAPTPGSNSTPGLRPVPGKPPGVDPLASSLR	T(80.23)DAPT(-80.23)PGS(-132.94)NS(-181.53)T(-199.73)PGLRPVPGKPPGVDPLAS(-341.09)S(-342.86)LR	1	4	-0.044127	366840000	366840000	0	0	9.4166	788	160	330	330	554;555	687;689	1093;1096;1097	2533;2534;2538;2539;2540;2541;2542;2543;2544	1096	2539	48334	1096	2539	48334	1096	2539	48334
Q05209	622	Q05209	Tyrosine-protein phosphatase non-receptor type 12	PTPN12	0.946491	12.4927	0	300.61	285.02	300.61	1	T	DSDERNSDGAVTQNKTNISTASATVSAATST	X;X;X;X;X;X;X;X;X;X;X;X;X;X;X;GalT_UC1;X;X;X;X;X;X;X;X;X;X;X;X;X;X;X	XXXXXXXXXXXXXXXPPPPPPPPPPPPPPPP	T(0.946)NIS(0.053)TASATVSAATSTESISTR	T(12.49)NIS(-12.49)T(-36.87)AS(-110.51)AT(-142.71)VS(-191.57)AAT(-239.52)S(-259.08)T(-259.08)ES(-270.42)IS(-278.71)T(-280.72)R	1	3	0.075355	141730000	141730000	0	0	NaN	789	161	622	622	589	734	1168;1169	2759;2760;2761;2762;2763;2764	1169	2762	33892	1169	2762	33892	1169	2762	33892
Q06546	264	Q06546	GA-binding protein alpha chain	GABPA	0.99999	50.1993	1.47214e-60	117.77	115.19	117.77	1	T	KYVLASQEQQMNEIVTIDQPVQIIPASVQSA	X;X;X;X;X;X;X;X;X;X;X;X;X;X;X;GalT_UC1;X;X;X;X;X;X;X;X;X;X;X;X;X;X;X	XPPPPPPPPPPPPPPPPPPPPPPPPPPPPPP	YVLASQEQQMNEIVT(1)IDQPVQIIPASVQSATPTTIK	YVLAS(-50.2)QEQQMNEIVT(50.2)IDQPVQIIPAS(-64.21)VQS(-81.36)AT(-88.71)PT(-92.17)T(-92.17)IK	15	4	0.044048	25385000	25385000	0	0	NaN	790	162	264	264	728	901	1398	3309;3310;3311;3312	1398	3309	89038	1398	3309	89038	1398	3309	89038
Q07157	976	Q07157	Tight junction protein ZO-1	TJP1	0.95332	14.0193	0.00696445	55.261	48.487	55.261	1	T	PAPSTSYSPQADSLRTPSTEAAHIMLRDQEP	X;X;X;X;X;X;X;X;X;X;X;X;X;X;X;GalT_UC1;X;X;X;X;X;X;X;X;X;X;X;X;X;X;X	XXXXXXXXXXXXXXXPPPPPPPPPPPPXXXX	T(0.953)PS(0.038)T(0.009)EAAHIMLR	T(14.02)PS(-14.02)T(-20.3)EAAHIMLR	1	4	0.074946	4429200	4429200	0	0	NaN	791	163	976	976	599	746	1186	2810	1186	2810	15376	1186	2810	15376	1186	2810	15376
Q07912	818	Q07912	Activated CDC42 kinase 1	TNK2	0.803952	9.13897	6.18349e-86	158.47	144.75	158.47	1	T	LPPRLSSSPGKTMPTTQSFASDPKYATPQVI	X;X;X;X;X;X;X;X;X;X;X;X;X;X;X;GalT_UC1;X;X;X;X;X;X;X;X;X;X;X;X;X;X;X	XXXXXXXXXXXPPPPPPPPPPPPPXXXXXXX	T(0.098)MPT(0.098)T(0.804)QSFASDPK	T(-9.14)MPT(-9.14)T(9.14)QS(-69.44)FAS(-107.11)DPK	5	3	0.79269	153160000	153160000	0	0	NaN	792	165	818	818	587	732	1166	2754;2755;2756;2757	1166	2755	17621	1166	2755	17621	1166	2755	17621
Q09666	247	Q09666	Neuroblast differentiation-associated protein AHNAK	AHNAK	1	47.1869	0.012025	47.187	22.133	47.187	1	T	SGPELQGAGHSKLQVTMPGIKVGGSGVNVNA	X;X;X;X;X;X;X;X;X;X;X;X;X;X;X;GalT_UC1;X;X;X;X;X;X;X;X;X;X;X;X;X;X;X	XXXXXXXXXXXXPPPPPPPPPXXXXXXXXXX	LQVT(1)MPGIK	LQVT(47.19)MPGIK	4	3	0.34934	6549400	6549400	0	0	NaN	793	166	247	247	294	359	568	1295	568	1295	28782	568	1295	28782	568	1295	28782
Q09666	5386	Q09666	Neuroblast differentiation-associated protein AHNAK	AHNAK	0.99991	40.4479	4.05105e-08	79.337	60.262	79.337	1	S	QGDLAVSGDIKCPKVSVGAPDLSLEASEGSI	X;X;X;X;X;X;X;X;X;X;X;X;X;X;X;GalT_UC1;X;X;X;X;X;X;X;X;X;X;X;X;X;X;X	XXXXXXXXXXXXXXPPPPPPPPPPPPPPPPP	VS(1)VGAPDLSLEASEGSIK	VS(40.45)VGAPDLS(-40.45)LEAS(-73.37)EGS(-78.3)IK	2	3	-0.53393	5292100	5292100	0	0	NaN	237	166	5386	5386	701	869	1355	3213	1355	3213	48005	1355	3213	48005	1355	3213	48005
Q09666	5603	Q09666	Neuroblast differentiation-associated protein AHNAK	AHNAK	0.999881	39.2465	0	248.09	206.81	248.09	1	S	LSVKGSGGEWKGPQVSSALNLDTSKFAGGLH	X;X;X;X;X;X;X;X;X;X;X;X;X;X;X;GalT_UC1;X;X;X;X;X;X;X;X;X;X;X;X;X;X;X	XXXXXXXXXXXPPPPPPPPPPPPPPXXXXXX	GPQVS(1)SALNLDTSK	GPQVS(39.25)S(-39.25)ALNLDT(-182.86)S(-203.99)K	5	3	-0.16432	458470000	458470000	0	0	NaN	236	166	5603	5603	168	206	321	768;769;770;771;772;773	321	769	22627	321	769	22627	321	769	22627
Q0JRZ9	488	Q0JRZ9	F-BAR domain only protein 2	FCHO2	0.775432	5.5357	1.34198e-86	139.83	123.2	139.83	1	S	TSGKLSGINEIPRPFSPPVTSNTSPPPAAPL	X;X;X;X;X;X;X;X;X;X;X;X;X;X;X;GalT_UC1;X;X;X;X;X;X;X;X;X;X;X;X;X;X;X	XXXXPPPPPPPPPPPPPPPPPPPPPPPPPPP	LS(0.001)GINEIPRPFS(0.775)PPVT(0.217)S(0.007)NT(0.001)SPPPAAPLAR	LS(-30.75)GINEIPRPFS(5.54)PPVT(-5.54)S(-20.76)NT(-30.75)S(-58.51)PPPAAPLAR	12	4	-0.14762	8803600	8803600	0	0	NaN	238	167	488	488	295	360	569	1296;1297	569	1297	63468	569	1297	63468	569	1297	63468
Q12797	454	Q12797	Aspartyl/asparaginyl beta-hydroxylase	ASPH	0.998163	27.3511	1.33598e-12	95.483	73.162	95.483	1	T	SLLTLQRLVQLFPNDTSLKNDLGVGYLLIGD	X;X;X;X;X;X;X;X;X;X;X;X;X;X;X;GalT_UC1;X;X;X;X;X;X;X;X;X;X;X;X;X;X;X	XXXXXXXPPPPPPPPPPPPXXXXXXXXXXXX	LVQLFPNDT(0.998)S(0.002)LK	LVQLFPNDT(27.35)S(-27.35)LK	9	3	-0.050816	28983000	28983000	0	0	NaN	796	170	454	454	303	368	579	1314;1315;1316	579	1315	45953	579	1315	45953	579	1315	45953
Q12830	2056	Q12830	Nucleosome-remodeling factor subunit BPTF	BPTF	0.90399	10.5844	1.91291e-34	109.38	88.942	109.38	2	T	QAKKRLEQQKPTVIATSTTSPTSSTTSTISP	X;X;X;X;X;X;X;X;X;X;X;X;X;X;X;GalT_UC1;GalT_UC1;X;X;X;X;X;X;X;X;X;X;X;X;X;X	XXXXXPPPPPPPPPPPPPPPPPPPPPPPPPP	LEQQKPT(0.008)VIAT(0.904)S(0.348)T(0.348)T(0.348)S(0.007)PT(0.035)S(0.003)STTSTISPAQK	LEQQKPT(-20.83)VIAT(10.58)S(0)T(0)T(0)S(-20.75)PT(-10.58)S(-20.83)S(-30.72)T(-49.35)T(-58.03)S(-66.26)T(-73.99)IS(-73.99)PAQK	11	4	-0.039163	26185000	0	26185000	0	NaN	802	172	2056	2056	270;431	333;526	535	1218;1219	535	1219	21244	535	1219	21244	535	1219	21244
Q12830	2229	Q12830	Nucleosome-remodeling factor subunit BPTF	BPTF	0.998094	27.1902	5.55702e-92	131.4	113.29	131.4	1	S	APQQVMTQIIRGQPVSTAVSAPNTVSSTPGQ	X;X;X;X;X;X;X;X;X;X;X;X;X;X;X;GalT_UC1;X;X;X;X;X;X;X;X;X;X;X;X;X;X;X	XXXXXXXXXXXPPPPPPPPPPPPPPPPPPPP	GQPVS(0.998)T(0.002)AVSAPNTVSSTPGQK	GQPVS(27.19)T(-27.19)AVS(-81)APNT(-114.05)VS(-128.64)S(-128.64)T(-129.15)PGQK	5	3	-0.32207	11120000	11120000	0	0	0.74239	242	172	2229	2229	169	207	323;324	776;777	324	777	19235	324	777	19235	324	777	19235
Q12830	2237	Q12830	Nucleosome-remodeling factor subunit BPTF	BPTF	0.907598	10.3885	2.81003e-50	119.39	101.79	119.39	1	T	IIRGQPVSTAVSAPNTVSSTPGQKSLTSATS	X;X;X;X;X;X;X;X;X;X;X;X;X;X;X;GalT_UC1;X;X;X;X;X;X;X;X;X;X;X;X;X;X;X	XXXPPPPPPPPPPPPPPPPPPPPPXXXXXXX	GQPVSTAVSAPNT(0.908)VS(0.083)S(0.008)T(0.001)PGQK	GQPVS(-51.15)T(-42.69)AVS(-35.07)APNT(10.39)VS(-10.39)S(-20.44)T(-30.16)PGQK	13	3	0.46242	186490000	186490000	0	0	12.45	801	172	2237	2237	169	207	322	774;775	322	775	18548	322	775	18548	322	775	18548
Q12830	2343	Q12830	Nucleosome-remodeling factor subunit BPTF	BPTF	0.891098	10.5261	0	268.25	248.43	268.25	2	T	PNGTVQRFLFTPLATTATTASTTTTTVSTTA	X;X;X;X;X;X;X;X;X;X;X;X;X;X;X;GalT_UC1;X;X;GalT_UC1;X;X;X;X;X;X;X;X;X;X;X;X	XXXXXXXPPPPPPPPPPPPPPPPPPPPPPPP	FLFT(0.023)PLAT(0.079)T(0.891)AT(0.088)T(0.919)ASTTTTTVSTTAAGTGEQR	FLFT(-15.85)PLAT(-10.53)T(10.53)AT(-10.53)T(10.53)AS(-41.18)T(-51.08)T(-67.97)T(-106.57)T(-124.34)T(-148.91)VS(-171.75)T(-189.49)T(-203.41)AAGT(-230.05)GEQR	9	4	0.19813	30069000	0	30069000	0	NaN	798	172	2343	2343	135	168	271	673	271	673	51127	271	673	51127	271	673	51127
Q12830	2346	Q12830	Nucleosome-remodeling factor subunit BPTF	BPTF	0.918955	10.5261	0	268.25	248.43	268.25	2	T	TVQRFLFTPLATTATTASTTTTTVSTTAAGT	X;X;X;X;X;X;X;X;X;X;X;X;GalT_UC1;X;X;GalT_UC1;X;X;X;X;X;X;X;X;X;X;X;X;X;X;X	XXXXPPPPPPPPPPPPPPPPPPPPPPPPPPP	FLFT(0.023)PLAT(0.079)T(0.891)AT(0.088)T(0.919)ASTTTTTVSTTAAGTGEQR	FLFT(-15.85)PLAT(-10.53)T(10.53)AT(-10.53)T(10.53)AS(-41.18)T(-51.08)T(-67.97)T(-106.57)T(-124.34)T(-148.91)VS(-171.75)T(-189.49)T(-203.41)AAGT(-230.05)GEQR	12	4	0.19813	30069000	0	30069000	0	NaN	799	172	2346	2346	135	168	271	673	271	673	51127	271	673	51127	271	673	51127
Q13283	268	Q13283	Ras GTPase-activating protein-binding protein 1	G3BP1	1	68.6582	1.30538e-18	96.247	83.21	96.247	1	T	SVTSKNLPPSGAVPVTGIPPHVVKVPASQPR	X;X;X;X;X;X;X;X;X;X;X;X;X;X;X;GalT_UC1;X;X;X;X;X;X;X;X;X;X;X;X;X;X;X	XXXXXPPPPPPPPPPPPPPPPPPPXXXXXXX	NLPPSGAVPVT(1)GIPPHVVK	NLPPS(-68.66)GAVPVT(68.66)GIPPHVVK	11	4	-0.10716	27247000	27247000	0	0	NaN	808	175	268	268	332	407	633;634	1410;1411;1412;1413;1414;1415;1416;1417	633	1413	41344	633	1413	41344	633	1413	41344
Q13492	453	Q13492	Phosphatidylinositol-binding clathrin assembly protein	PICALM	0.882326	8.89007	2.64215e-26	105.14	78.702	105.14	1	S	PFLTKSSGDVHLSISSDVSTFTTRTPTHEMF	X;X;X;X;X;X;X;X;X;X;X;X;X;X;X;GalT_UC1;X;X;X;X;X;X;X;X;X;X;X;X;X;X;X	XXXXXPPPPPPPPPPPPPPPPPPPXXXXXXX	SSGDVHLS(0.002)IS(0.114)S(0.882)DVS(0.001)T(0.001)FTTR	S(-48.8)S(-41.46)GDVHLS(-25.79)IS(-8.89)S(8.89)DVS(-31.26)T(-31.26)FT(-45.91)T(-54.24)R	11	4	0.70177	4815200	4815200	0	0	NaN	253	176	453	453	506	621	948	2166;2167	948	2167	42485	948	2167	42485	948	2167	42485
Q13492;Q5T5P2	297;743	Q13492	Phosphatidylinositol-binding clathrin assembly protein;Sickle tail protein homolog	PICALM;KIAA1217	1	66.8812	3.41996e-27	125.31	79.946	125.31	1	S	LASLEGKKIKDSTAASRATTLSNAVSSLAST	X;X;X;X;X;X;X;X;X;X;X;X;X;X;X;GalT_UC1;X;X;X;X;X;X;X;X;X;X;X;X;X;X;X	XXXXXXXXPPPPPPPPPXXXXXXXXXXXXXX	IKDSTAAS(1)R	IKDS(-78.13)T(-66.88)AAS(66.88)R	8	3	-0.20031	9790700	9790700	0	0	3.6357	249	176	297	297	91;216	115;262	183;184;185;186;187;188;189;190;410;411	470;471;472;473;474;475;476;477;970;971;972;973	410	970	1532	410	970	1532	410	970	1532
Q13546	331	Q13546	Receptor-interacting serine/threonine-protein kinase 1	RIPK1	0.88244	8.75427	1.70657e-06	80.312	61.735	80.312	1	S	KRMQSLQLDCVAVPSSRSNSATEQPGSLHSS	X;X;X;X;X;X;X;X;X;X;X;X;X;X;X;GalT_UC1;X;X;X;X;X;X;X;X;X;X;X;X;X;X;X	XXPPPPPPPPPPPPPPPXXXXXXXXXXXXXX	MQSLQLDCVAVPS(0.118)S(0.882)R	MQS(-75.18)LQLDCVAVPS(-8.75)S(8.75)R	14	3	-0.15609	6142500	6142500	0	0	NaN	254	177	331	331	316	388	609	1364;1365	609	1365	42424	609	1365	42424	609	1365	42424
Q13586	170	Q13586	Stromal interaction molecule 1	STIM1	0.786019	5.66447	1.23611e-49	132.32	115.1	132.32	1	T	RKLQLSGHAMPRLAVTNTTMTGTVLKMTDRS	X;X;X;X;X;X;X;X;X;X;X;X;X;X;X;GalT_UC1;X;X;X;X;X;X;X;X;X;X;X;X;X;X;X	XXXXXXXXXXXXPPPPPPPPPPPPPPXXXXX	LAVT(0.786)NT(0.213)T(0.001)MTGTVLK	LAVT(5.66)NT(-5.66)T(-30.61)MT(-66.3)GT(-89.03)VLK	4	3	-0.35171	36141000	36141000	0	0	NaN	811	178	170	170	266	329	531	1212;1213;1214	531	1213	31749	531	1213	31749	531	1213	31749
Q13950	333	Q13950	Runt-related transcription factor 2	RUNX2	0.976056	16.1028	0.0268041	43.512	28.59	43.512	1	T	TTPLSSTRGTGLPAITDVPRRISDDDTATSD	X;X;X;X;X;X;X;X;X;X;X;X;X;X;X;GalT_UC1;X;X;X;X;X;X;X;X;X;X;X;X;X;X;X	XXXXXXXXPPPPPPPPPPPPXXXXXXXXXXX	GT(0.024)GLPAIT(0.976)DVPR	GT(-16.1)GLPAIT(16.1)DVPR	8	3	0.50698	2730300	2730300	0	0	NaN	812	181	333	333	176	215	334	793	334	793	36138	334	793	36138	334	793	36138
Q14004	1287	Q14004	Cyclin-dependent kinase 13	CDK13	0.919384	10.9559	1.15339e-216	203.27	178.22	203.27	1	T	EEDLDYRTENQHVPTTSSSLTDPHAGVKAAL	X;X;X;X;X;X;X;X;X;X;X;X;X;X;X;GalT_UC1;X;X;X;X;X;X;X;X;X;X;X;X;X;X;X	XXXXXXXPPPPPPPPPPPPPPPPPPPPPXXX	TENQHVPT(0.074)T(0.919)S(0.006)S(0.001)SLTDPHAGVK	T(-76.64)ENQHVPT(-10.96)T(10.96)S(-21.69)S(-32.19)S(-42.47)LT(-62.31)DPHAGVK	9	5	-0.39521	186700000	186700000	0	0	4.2003	813	182	1287	1287	560	695	1105;1106	2565;2566;2567;2568;2569;2570;2571;2572;2573	1105	2568	11305	1105	2568	11305	1105	2568	11305
Q14119	108	Q14119	Vascular endothelial zinc finger 1	VEZF1	0.758941	7.99142	1.47821e-83	144.8	117.67	68.481		T	ESCHTGIKLVSRPKKTPTTVVPLISTIAGDS	X;X;X;X;X;X;X;X;X;X;X;X;X;X;X;GalT_UC1;X;X;X;X;X;X;X;X;GalT_UC1;GalT_UC1;X;X;X;X;X	XXXXXXXXXXXXXXPPPPPPPPPPPPPPPPP	KT(0.759)PT(0.121)T(0.121)VVPLISTIAGDSSR	KT(7.99)PT(-7.99)T(-7.99)VVPLIS(-47.53)T(-60.56)IAGDS(-66.55)S(-66.55)R	2	3	0.73726	5491500	5491500	0	0	0.2787	814	183	108	108	256;602	315;316;317;750	514	1181	514	1181	38396	513	1180	44072	513	1180	44072
Q14119	111	Q14119	Vascular endothelial zinc finger 1	VEZF1	0.817077	8.70404	7.77994e-137	172.17	152.57	77.185	2	T	HTGIKLVSRPKKTPTTVVPLISTIAGDSSRT	X;X;X;X;X;X;X;X;X;X;X;X;X;X;X;GalT_UC1;X;X;X;X;X;GalT_UC1;X;X;X;X;X;X;X;X;X	XXXXXXXXXXXPPPPPPPPPPPPPPPPPPPX	KT(0.073)PT(0.11)T(0.817)VVPLIS(0.5)T(0.5)IAGDSSR	KT(-10.51)PT(-8.7)T(8.7)VVPLIS(0)T(0)IAGDS(-41.53)S(-48.37)R	5	3	0.1301	14194000	0	14194000	0	0.72038	816	183	111	111	256;602	315;316;317;750	509	1173	509	1173	27856	508	1172	27751	508	1172	27751
Q14119	117	Q14119	Vascular endothelial zinc finger 1	VEZF1	0.973055	20.4921	1.28201e-180	189.13	169.13	43.03	1;2;3	S	VSRPKKTPTTVVPLISTIAGDSSRTSLVSTI	X;X;X;X;X;X;GalT_UC1;X;X;GalT_UC1;X;X;X;X;X;GalT_UC1;GalT_UC1;X;X;X;X;X;X;X;X;X;X;X;X;X;X	XXXXXPPPPPPPPPPPPPPPPPPPXXXXXXX	KT(0.009)PT(0.009)T(0.009)VVPLIS(0.973)T(0.973)IAGDS(0.02)S(0.007)R	KT(-26.28)PT(-26.28)T(-26.14)VVPLIS(20.49)T(20.49)IAGDS(-20.49)S(-26.14)R	11	3	0.44476	122910000	18766000	29908000	74239000	6.2381	258	183	117	117	256;602	315;316;317;750	507;509;510;512	1169;1170;1173;1174;1177;1178	510	1174	28364	512	1178	38936	512	1178	38936
Q14119	118	Q14119	Vascular endothelial zinc finger 1	VEZF1	0.994607	22.6816	1.28201e-180	189.13	169.13	172.17	1;2;3	T	SRPKKTPTTVVPLISTIAGDSSRTSLVSTIA	X;X;X;X;X;GalT_UC1;X;GalT_UC1;X;X;X;X;X;X;GalT_UC1;GalT_UC1;X;X;X;X;X;X;X;X;X;X;X;X;X;X;X	XXXXPPPPPPPPPPPPPPPPPPPXXXXXXXX	KT(0.034)PT(0.483)T(0.483)VVPLIS(0.005)T(0.995)IAGDSSR	KT(-11.5)PT(0)T(0)VVPLIS(-22.68)T(22.68)IAGDS(-99.68)S(-99.68)R	12	4	-0.21222	246210000	66395000	105580000	74239000	12.496	817	183	118	118	256;602	315;316;317;750	507;508;509;510;511;512;1190	1169;1170;1171;1172;1173;1174;1175;1176;1177;1178;2819;2820;2821;2822	508	1172	27751	512	1178	38936	512	1178	38936
Q14157	325	Q14157	Ubiquitin-associated protein 2-like	UBAP2L	0.862617	9.86053	6.0564e-54	124.26	104.97	124.26	1	S	LAQPLVFSNSKQTAISQPASGNTFSHHSMVS	X;X;X;X;X;X;X;X;X;X;X;X;X;X;X;GalT_UC1;X;X;X;X;X;X;X;X;X;X;X;X;X;X;X	XXXXXXXXXXXPPPPPPPPPPPPPPPPPPPP	QT(0.089)AIS(0.863)QPAS(0.048)GNTFSHHSMVSMLGK	QT(-9.86)AIS(9.86)QPAS(-12.52)GNT(-45.24)FS(-74.18)HHS(-97.84)MVS(-105.23)MLGK	5	4	-0.69319	9599400	9599400	0	0	NaN	260	184	325	325	424	515	788	1778;1779	788	1779	29528	788	1779	29528	788	1779	29528
Q14161	551	Q14161	ARF GTPase-activating protein GIT2	GIT2	0.943937	12.2639	0	273.61	234.41	273.61	1	S	ESRMRLQPFPAHIGRSALVTSSSSLPSFPST	X;X;X;X;X;X;X;X;X;X;X;X;X;X;X;GalT_UC1;X;X;X;X;X;X;X;X;X;X;X;X;X;X;X	XXXXXXXXXXXXXXXPPPPPPPPPPPPPPPP	S(0.944)ALVT(0.056)SSSSLPSFPSTLSWSR	S(12.26)ALVT(-12.26)S(-47.76)S(-81.29)S(-92.03)S(-122.85)LPS(-186.22)FPS(-241.49)T(-243.58)LS(-255.99)WS(-264.68)R	1	3	0.045736	16580000	16580000	0	0	NaN	265	185	551	551	438	536	821	1855;1856;1857;1858	821	1856	72386	821	1856	72386	821	1856	72386
Q14247	322	Q14247	Src substrate cortactin	CTTN	0.835341	9.67147	1.80824e-25	103.76	92.974	103.76	1	S	GGKYGVQKDRMDKNASTFEDVTQVSSAYQKT	X;X;X;X;X;X;X;X;X;X;X;X;X;X;X;GalT_UC1;X;X;X;X;X;X;X;X;X;X;X;X;X;X;X	XXXXXXXXXXXXXPPPPPPPPPPPPPPPPPX	NAS(0.835)T(0.09)FEDVT(0.065)QVS(0.009)S(0.001)AYQK	NAS(9.67)T(-9.67)FEDVT(-11.11)QVS(-19.59)S(-30.74)AYQK	3	3	-0.43665	35813000	35813000	0	0	NaN	266	186	322	322	324	398	621	1387;1388	621	1388	31463	621	1388	31463	621	1388	31463
Q14657	142	Q14657	EKC/KEOPS complex subunit LAGE3	LAGE3	1	76.1344	0.00603965	76.134	52.341	76.134	1	S	LSLVVRTMQRFGPPVSR______________	X;X;X;X;X;X;X;X;X;X;X;X;X;X;X;GalT_UC1;X;X;X;X;X;X;X;X;X;X;X;X;X;X;X	XXXXXXXXXXPPPPPPPXXXXXXXXXXXXXX	FGPPVS(1)R	FGPPVS(76.13)R	6	3	0.073009	75907000	75907000	0	0	NaN	267	187	142	142	129	158	254	621;622	254	621	9183	254	621	9183	254	621	9183
Q14677	624	Q14677	Clathrin interactor 1	CLINT1	1	112.842	8.86077e-25	112.84	91.083	112.84	1	S	TVQPKQDAFANFANFSK______________	X;X;X;X;X;X;X;X;X;X;X;X;X;X;X;GalT_UC1;X;X;X;X;X;X;X;X;X;X;X;X;X;X;X	XXXXXPPPPPPPPPPPPXXXXXXXXXXXXXX	QDAFANFANFS(1)K	QDAFANFANFS(112.84)K	11	3	-0.41824	10108000	10108000	0	0	NaN	270	189	624	624	400	487	751	1699	751	1699	41680	751	1699	41680	751	1699	41680
Q14684	728	Q14684	Ribosomal RNA processing protein 1 homolog B	RRP1B	0.887806	11.9947	3.00179e-91	155.97	140.43	155.97	1	T	VAFDPEQKPLHGVLKTPTSSPASSPLVAKKP	X;X;X;X;X;X;X;X;X;X;X;X;X;X;X;GalT_UC1;X;X;X;X;X;X;X;X;X;X;X;X;X;X;X	XXXXXXXXXXXXXXXPPPPPPPPPPPPPPXX	T(0.888)PT(0.056)S(0.056)SPASSPLVAK	T(11.99)PT(-11.99)S(-11.99)S(-45.89)PAS(-85.88)S(-94.86)PLVAK	1	3	0.19614	347740000	347740000	0	0	NaN	822	191	728	728	601	749	1189	2814;2815;2816;2817;2818	1189	2815	11892	1189	2815	11892	1189	2815	11892
Q14686	1933	Q14686	Nuclear receptor coactivator 6	NCOA6	0.988119	19.1996	6.66077e-137	174.37	162.6	174.37	1	T	VTTLVPSELISAVPTTKSNHGGIASESLAGG	X;X;X;X;X;X;X;X;X;X;X;X;X;X;X;GalT_UC1;X;X;X;X;X;X;X;X;X;X;X;X;X;X;X	PPPPPPPPPPPPPPPPPXXXXXXXXXXXXXX	SIVTTLVPSELISAVPT(0.012)T(0.988)K	S(-121.51)IVT(-113.88)T(-113.88)LVPS(-103.01)ELIS(-86.36)AVPT(-19.2)T(19.2)K	18	3	0.24097	66817000	66817000	0	0	NaN	825	192	1933	1933	459	565	876	2001;2002;2003;2004;2005;2006;2007	876	2004	81181	876	2004	81181	876	2004	81181
Q14980	2092	Q14980	Nuclear mitotic apparatus protein 1	NUMA1	0.912073	10.1646	2.34824e-117	164.88	143.35	164.88	1	T	SPNTRSGTRRSPRIATTTASAATAAAIGATP	X;X;X;X;X;X;X;X;X;X;X;X;X;X;X;GalT_UC1;X;X;X;X;X;X;X;X;X;X;X;X;X;X;X	XXXXXXXXXXXXXPPPPPPPPPPPPPPPPPP	IAT(0.912)T(0.088)TASAATAAAIGATPR	IAT(10.16)T(-10.16)T(-39.16)AS(-61.09)AAT(-96.4)AAAIGAT(-161.15)PR	3	3	0.051568	19019000	19019000	0	0	NaN	826	193	2092	2092	200	243	380	894;895	380	895	30396	380	895	30396	380	895	30396
Q15149	638	Q15149	Plectin	PLEC	1	67.7558	4.11106e-63	128.06	116.54	128.06	1	T	TEYNLRLKAGVAAPATQVAQVTLQSVQRRPE	X;X;X;X;X;X;X;X;X;X;X;X;X;X;X;GalT_UC1;X;X;X;X;X;X;X;X;X;X;X;X;X;X;X	XXXXXXXXPPPPPPPPPPPPPPPPPPPPXXX	AGVAAPAT(1)QVAQVTLQSVQR	AGVAAPAT(67.76)QVAQVT(-67.76)LQS(-94.92)VQR	8	3	0.23841	12032000	12032000	0	0	NaN	828	195	638	638	13	15	25	66;67	25	67	45342	25	67	45342	25	67	45342
Q15293	55	Q15293	Reticulocalbin-1	RCN1	1	129.176	0	300.24	276.76	300.24	1	S	RPDSELGERPPEDNQSFQYDHEAFLGKEDSK	X;X;X;X;X;X;X;X;X;X;X;X;X;X;X;GalT_UC1;X;X;X;X;X;X;X;X;X;X;X;X;X;X;X	PPPPPPPPPPPPPPPPPPPPPPPPPPPXXXX	VVRPDSELGERPPEDNQS(1)FQYDHEAFLGK	VVRPDS(-129.18)ELGERPPEDNQS(129.18)FQYDHEAFLGK	18	5	0.18889	3169200000	3169200000	0	0	NaN	272	197	55	55	714	885	1372;1373;1374;1375;1376;1377;1378	3254;3255;3256;3257;3258;3259;3260;3261;3262;3263;3264;3265;3266;3267;3268;3269;3270;3271;3272;3273;3274	1372	3257	41464	1372	3257	41464	1374	3265	41421
Q15637	328	Q15637	Splicing factor 1	SF1	0.999981	47.5735	0	214.49	206.01	214.49	1	S	YLSLMAELGEAPVPASVGSTSGPATTPLASA	X;X;X;X;X;X;X;X;X;X;X;X;X;X;X;GalT_UC1;X;X;X;X;X;X;X;X;X;X;X;X;X;X;X	PPPPPPPPPPPPPPPPPPPPPPPPPPPPPPP	EYLSLMAELGEAPVPAS(1)VGSTSGPATTPLASAPR	EYLS(-82.55)LMAELGEAPVPAS(47.57)VGS(-47.57)T(-60.35)S(-69.73)GPAT(-87.89)T(-96.67)PLAS(-132.82)APR	17	4	-0.28821	10760000	10760000	0	0	NaN	273	198	328	328	125	154	249	610;611	249	611	89732	249	611	89732	249	611	89732
Q15652	1087	Q15652	Probable JmjC domain-containing histone demethylation protein 2C	JMJD1C	0.897566	9.87583	1.23001e-137	166.6	156.89	166.6	1	S	RSVSDLYKMKHSVPQSLPQSNYFTTLSNSVV	X;X;X;X;X;X;X;X;X;X;X;X;X;X;X;GalT_UC1;X;X;X;X;X;X;X;X;X;X;X;X;X;X;X	XXXXXXXXXXPPPPPPPPPPPPPPPPPPPPP	HS(0.092)VPQS(0.898)LPQS(0.01)NYFTTLSNSVVNEPPR	HS(-9.88)VPQS(9.88)LPQS(-19.5)NYFT(-52.87)T(-75.71)LS(-88.64)NS(-115.17)VVNEPPR	6	4	0.26368	26305000	26305000	0	0	NaN	274	199	1087	1087	196	239	376	889;890	376	890	57587	376	890	57587	376	890	57587
Q15652	1457	Q15652	Probable JmjC domain-containing histone demethylation protein 2C	JMJD1C	0.911903	11.4711	1.10257e-08	74.165	38.624	74.165		T	VAQKQECKVSTTAPVTLASSKTGSVVQPSSG	X;X;X;X;X;X;X;X;X;X;X;X;X;X;X;GalT_UC1;X;X;X;X;X;X;X;X;X;X;X;X;X;X;X	XXXXXXXXPPPPPPPPPPPPPXXXXXXXXXX	VS(0.065)T(0.01)T(0.01)APVT(0.912)LAS(0.002)SK	VS(-11.47)T(-19.39)T(-19.39)APVT(11.47)LAS(-26.45)S(-41.08)K	8	3	0.35345	47355000	47355000	0	0	11.494	832	199	1457	1457	699	865	1350	3205	1350	3205	14436	1350	3205	14436	1350	3205	14436
Q15654	158	Q15654	Thyroid receptor-interacting protein 6	TRIP6	0.899735	9.96827	0	267.5	248.62	267.5	1	T	PLPASPYGGPTPASYTTASTPAGPAFPVQVK	X;X;X;X;X;X;X;X;X;X;X;X;X;X;X;GalT_UC1;X;X;X;X;X;X;X;X;X;X;X;X;X;X;X	PPPPPPPPPPPPPPPPPPPPPPPPPPPPPPP	TGSLKPNPASPLPASPYGGPTPAS(0.009)YT(0.9)T(0.091)ASTPAGPAFPVQVK	T(-164.98)GS(-157.72)LKPNPAS(-110.57)PLPAS(-84.86)PYGGPT(-39.08)PAS(-19.81)YT(9.97)T(-9.97)AS(-39.08)T(-66.97)PAGPAFPVQVK	26	5	-0.043687	28107000	28107000	0	0	NaN	834	200	158	158	566	702	1115	2593;2594;2595	1115	2594	68647	1115	2594	68647	1115	2594	68647
Q15750	391	Q15750	TGF-beta-activated kinase 1 and MAP3K7-binding protein 1	TAB1	0.997799	27.3219	0.00297945	54.7	45.012	54.7	1	S	TPSPAPAAGGRVYPVSVPYSSAQSTSKTSVT	X;X;X;X;X;X;X;X;X;X;X;X;X;X;X;GalT_UC1;X;X;X;X;X;X;X;X;X;X;X;X;X;X;X	XXXXXXXXXXXPPPPPPPPPPPPPPPPXXXX	VYPVS(0.998)VPYS(0.002)SAQSTSK	VYPVS(27.32)VPYS(-27.32)S(-35.89)AQS(-44.96)T(-44.96)S(-44.96)K	5	2	0.032519	66519000	66519000	0	0	NaN	279	202	391	391	719	891	1388	3295	1388	3295	26096	1388	3295	26096	1388	3295	26096
Q15750	395	Q15750	TGF-beta-activated kinase 1 and MAP3K7-binding protein 1	TAB1	0.971641	16.5174	7.3647e-111	168.98	151.7	168.98	1	S	APAAGGRVYPVSVPYSSAQSTSKTSVTLSLV	X;X;X;X;X;X;X;X;X;X;X;X;X;X;X;GalT_UC1;X;X;X;X;X;X;X;X;X;X;X;X;X;X;X	XXXXXXXPPPPPPPPPPPPPPPPXXXXXXXX	VYPVS(0.022)VPYS(0.972)S(0.007)AQSTSK	VYPVS(-16.52)VPYS(16.52)S(-21.66)AQS(-42.15)T(-61.45)S(-66.25)K	9	3	0.37963	487730000	487730000	0	0	NaN	280	202	395	395	719	891	1387	3288;3289;3290;3291;3292;3293;3294	1387	3289	25970	1387	3289	25970	1387	3289	25970
Q15751	1840	Q15751	Probable E3 ubiquitin-protein ligase HERC1	HERC1	0.999987	48.8864	0.00483038	53.777	36.838	53.777		S	TTGTYADKLSPKVVQSLLDLLCSQLKNLLSQ	X;X;X;X;X;X;X;X;X;X;X;X;X;X;X;GalT_UC1;X;X;X;X;X;X;X;X;X;X;X;X;X;X;X	XXXXXXXXXXXXPPPPPPPPPPPPPPXXXXX	VVQS(1)LLDLLCSQLK	VVQS(48.89)LLDLLCS(-48.89)QLK	4	2	0.082837	19955000	19955000	0	0	NaN	281	203	1840	1840	713	884	1371	3253	1371	3253	45065	1371	3253	45065	1371	3253	45065
Q15904	172	Q15904	V-type proton ATPase subunit S1	ATP6AP1	1	118.403	2.8701e-33	118.4	84.607	118.4	1	S	LHVDLATLRELKLNASLPALLLIRLPYTASS	X;X;X;X;X;X;X;X;X;X;X;X;X;X;X;GalT_UC1;X;X;X;X;X;X;X;X;X;X;X;X;X;X;X	XXXXXXXXXXXXPPPPPPPPPPPPXXXXXXX	LNAS(1)LPALLLIR	LNAS(118.4)LPALLLIR	4	3	0.17729	31618000	31618000	0	0	NaN	282	204	172	172	283	348	555	1272;1273	555	1273	73766	555	1273	73766	555	1273	73766
Q15911	353	Q15911	Zinc finger homeobox protein 3	ZFHX3	0.994145	22.2992	5.58787e-301	228.73	199.84	228.73	1	S	SFLEPKNKNFQHPLVSTANLIGPGHSFYGKF	X;X;X;X;X;X;X;X;X;X;X;X;X;X;X;GalT_UC1;X;X;X;X;X;X;X;X;X;X;X;X;X;X;X	XXXXXXXXPPPPPPPPPPPPPPPPPPPPPPX	NFQHPLVS(0.994)T(0.006)ANLIGPGHSFYGK	NFQHPLVS(22.3)T(-22.3)ANLIGPGHS(-142.9)FYGK	8	4	0.081	61979000	61979000	0	0	8.4148	283	205	353	353	329	403	628;629	1398;1399;1400;1401;1402;1403;1404;1405	629	1403	44411	629	1403	44411	629	1403	44411
Q15942	169	Q15942	Zyxin	ZYX	0.996805	24.9411	3.00699e-259	217.09	198.03	217.09	1	S	LLDDMTKNDPFKARVSSGYVPPPVATPFSSK	X;X;X;X;X;X;X;X;X;X;X;X;X;X;X;GalT_UC1;X;X;X;X;X;X;X;X;X;X;X;X;X;X;X	XXXXXXXXXXXXXXPPPPPPPPPPPPPPPPP	VS(0.997)S(0.003)GYVPPPVATPFSSK	VS(24.94)S(-24.94)GYVPPPVAT(-184.79)PFS(-206.66)S(-210.43)K	2	3	-0.25034	65184000	65184000	0	0	NaN	287	206	169	169	695	861	1344	3178;3179;3180;3181;3182;3183	1344	3180	43632	1344	3180	43632	1344	3180	43632
Q15942	246	Q15942	Zyxin	ZYX	0.999475	32.9916	1.32969e-215	202.32	183.24	138.02	1	S	KPQVQLHVQSQTQPVSLANTQPRGPPASSPA	X;X;X;X;X;X;X;X;X;X;X;X;X;X;X;GalT_UC1;X;X;X;X;X;X;X;X;X;X;X;X;X;X;X	XPPPPPPPPPPPPPPPPPPPPPPXXXXXXXX	PQVQLHVQSQTQPVS(0.999)LANT(0.001)QPR	PQVQLHVQS(-60.52)QT(-46.62)QPVS(32.99)LANT(-32.99)QPR	15	3	0.023384	664460000	664460000	0	0	46.912	284	206	246	246	374	455	708;709	1586;1587;1588;1589;1590;1591;1592;1593;1594;1595;1596;1597;1598;1599	708	1587	30055	709	1591	30089	709	1591	30089
Q16186	211	Q16186	Proteasomal ubiquitin receptor ADRM1	ADRM1	0.868719	8.22209	1.72816e-19	126.71	117.75	86.548	1	S	GSSGPPGSSSSSSSRSQSAAVTPSSTTSSTR	X;X;X;X;X;X;X;X;X;X;X;X;X;X;X;GalT_UC1;X;X;X;X;X;X;X;X;X;X;X;X;X;X;X	XXXXXXXXXXXXXXXPPPPPPPPPPPPPPPP	S(0.869)QS(0.131)AAVTPSSTTSSTR	S(8.22)QS(-8.22)AAVT(-32.98)PS(-47.21)S(-52.68)T(-57.92)T(-62.91)S(-62.07)S(-62.91)T(-62.91)R	1	3	0.047934	1429300000	1429300000	0	0	18.747	288	207	211	211	494	604	925;928	2123;2124;2125;2131;2132	928	2131	8298	925	2123	7181	925	2123	7181
Q16186	219	Q16186	Proteasomal ubiquitin receptor ADRM1	ADRM1	0.922616	15.6285	5.00195e-92	157.75	121.06	157.75	1	S	SSSSSSRSQSAAVTPSSTTSSTRATPAPSAP	X;X;X;X;X;X;X;X;X;X;X;X;X;X;X;GalT_UC1;X;X;X;X;X;X;X;X;X;X;X;X;X;X;X	XXXXXXXPPPPPPPPPPPPPPPPXXXXXXXX	S(0.025)QS(0.025)AAVT(0.005)PS(0.923)S(0.005)T(0.017)TSSTR	S(-15.63)QS(-15.63)AAVT(-22.9)PS(15.63)S(-22.9)T(-17.26)T(-40.23)S(-51.13)S(-61.63)T(-81.41)R	9	3	-0.026141	58152000	58152000	0	0	0.76275	289	207	219	219	494	604	927	2128;2129;2130	927	2130	8156	927	2130	8156	927	2130	8156
Q16594	202	Q16594	Transcription initiation factor TFIID subunit 9	TAF9	0.990546	20.2083	1.4358e-190	192.78	174.48	192.78	1	S	FTVQMPTSQSPAVKASIPATSAVQNVLINPS	X;X;X;X;X;X;X;X;X;X;X;X;X;X;X;GalT_UC1;X;X;X;X;X;X;X;X;X;X;X;X;X;X;X	XXXXXXXXXXXXXXPPPPPPPPPPPPPPPPP	AS(0.991)IPAT(0.009)SAVQNVLINPSLIGSK	AS(20.21)IPAT(-20.21)S(-48.9)AVQNVLINPS(-170.21)LIGS(-179.98)K	2	3	-0.074132	21451000	21451000	0	0	NaN	290	208	202	202	43	55	97	294;295	97	295	70265	97	295	70265	97	295	70265
Q16594	207	Q16594	Transcription initiation factor TFIID subunit 9	TAF9	0.824235	9.72149	3.82668e-39	112.3	102.02	112.3	1	S	PTSQSPAVKASIPATSAVQNVLINPSLIGSK	X;X;X;X;X;X;X;X;X;X;X;X;X;X;X;GalT_UC1;X;X;X;X;X;X;X;X;X;X;X;X;X;X;X	XXXXXXXXXPPPPPPPPPPPPPPPPPPPPPP	AS(0.088)IPAT(0.088)S(0.824)AVQNVLINPSLIGSK	AS(-9.72)IPAT(-9.72)S(9.72)AVQNVLINPS(-90.68)LIGS(-96.6)K	7	3	-0.1537	23266000	23266000	0	0	NaN	291	208	207	207	43	55	98	296;297	98	297	72019	98	297	72019	98	297	72019
Q16880	79	Q16880	2-hydroxyacylsphingosine 1-beta-galactosyltransferase	UGT8	0.905527	10.288	7.7919e-18	94.767	79.998	94.767	1	S	PSNHYSLQRYPGIFNSTTSDAFLQSKMRNIF	X;X;X;X;X;X;X;X;X;X;X;X;X;X;X;GalT_UC1;X;X;X;X;X;X;X;X;X;X;X;X;X;X;X	XXXXXXXXXPPPPPPPPPPPPPPPPPXXXXX	YPGIFNS(0.906)T(0.085)T(0.009)S(0.001)DAFLQSK	YPGIFNS(10.29)T(-10.29)T(-20.16)S(-29.59)DAFLQS(-74.14)K	7	3	-0.057776	9939900	9939900	0	0	NaN	292	209	79	79	721	893	1390	3299;3300	1390	3300	56676	1390	3300	56676	1390	3300	56676
Q2KHR3	74	Q2KHR3	Glutamine and serine-rich protein 1	QSER1	0.923004	10.8207	0	229.86	211.09	229.86	1	T	SAYQHPTTFSNRNFATTSPLVLQDSTFNTTS	X;X;X;X;X;X;X;X;X;X;X;X;X;X;X;GalT_UC1;X;X;X;X;X;X;X;X;X;X;X;X;X;X;X	XXXXXXXXXXXXPPPPPPPPPPPPPPPPPPP	NFAT(0.923)T(0.076)S(0.001)PLVLQDSTFNTTSNGILSHHDPLLQIK	NFAT(10.82)T(-10.82)S(-31.95)PLVLQDS(-134.5)T(-142.52)FNT(-172.06)T(-174.18)S(-179.31)NGILS(-210.96)HHDPLLQIK	4	5	-0.19408	20016000	20016000	0	0	NaN	842	211	74	74	328	402	627	1396;1397	627	1397	77853	627	1397	77853	627	1397	77853
Q2KHR3	105	Q2KHR3	Glutamine and serine-rich protein 1	QSER1	0.964094	14.2895	0	265.01	232.39	265.01	1	S	NGILSHHDPLLQIKTSQGTVPTALAFERLGS	X;X;X;X;X;X;X;X;X;X;X;X;X;X;X;GalT_UC1;X;X;X;X;X;X;X;X;X;X;X;X;X;X;X	XXXXXXXXXXXXXXPPPPPPPPPPPPPPXXX	T(0.036)S(0.964)QGTVPTALAFER	T(-14.29)S(14.29)QGT(-109.04)VPT(-154.94)ALAFER	2	3	0.18244	214240000	214240000	0	0	NaN	296	211	105	105	619	771	1220	2877;2878	1220	2878	32456	1220	2878	32456	1220	2878	32456
Q2KHR3	959	Q2KHR3	Glutamine and serine-rich protein 1	QSER1	0.999944	42.5069	0	244.23	207.64	244.23	1	T	QQHIETPGQNIPTKVTSAVVGPSHEVQEQSS	X;X;X;X;X;X;X;X;X;X;X;X;X;X;X;GalT_UC1;X;X;X;X;X;X;X;X;X;X;X;X;X;X;X	XXXXXXXXXXXXXXPPPPPPPPPPPPPPPPP	VT(1)SAVVGPSHEVQEQSSGPFK	VT(42.51)S(-42.51)AVVGPS(-163.72)HEVQEQS(-222.7)S(-229.31)GPFK	2	4	-0.40182	25296000	25296000	0	0	NaN	844	211	959	959	708	878	1365	3233;3234;3235;3236;3237;3238	1365	3236	21335	1365	3236	21335	1365	3236	21335
Q2KHR3	1270	Q2KHR3	Glutamine and serine-rich protein 1	QSER1	0.978249	16.664	1.09399e-189	162.83	138.19	162.83		T	ATSDKKKKTEALQVATTSPTANTTGTATTSS	X;X;X;X;X;X;X;X;X;X;X;X;X;X;X;GalT_UC1;GalT_UC1;X;X;X;X;X;X;X;X;X;X;X;X;X;X	XXXXXXXPPPPPPPPPPPPPPPPPPPPPPPP	KTEALQVAT(0.978)T(0.978)S(0.042)PT(0.002)ANTTGTATTSSTTVGAVK	KT(-47.86)EALQVAT(16.66)T(16.66)S(-16.66)PT(-32.64)ANT(-47.91)T(-55.27)GT(-62.45)AT(-87.31)T(-106.27)S(-123.01)S(-129.49)T(-136.36)T(-142.64)VGAVK	9	4	0.67724	23910000	0	23910000	0	NaN	838	211	1270	1270	254;558	312;313;692;693	505	1167	505	1167	21427	505	1167	21427	505	1167	21427
Q2KHR3	1271	Q2KHR3	Glutamine and serine-rich protein 1	QSER1	0.978261	16.664	1.09399e-189	162.83	138.19	162.83	2	T	TSDKKKKTEALQVATTSPTANTTGTATTSST	X;X;X;X;X;X;X;X;X;X;X;X;X;X;GalT_UC1;GalT_UC1;X;X;X;X;X;X;X;X;X;X;X;GalT_UC1;X;X;X	XXXXXXPPPPPPPPPPPPPPPPPPPPPPPPP	KTEALQVAT(0.978)T(0.978)S(0.042)PT(0.002)ANTTGTATTSSTTVGAVK	KT(-47.86)EALQVAT(16.66)T(16.66)S(-16.66)PT(-32.64)ANT(-47.91)T(-55.27)GT(-62.45)AT(-87.31)T(-106.27)S(-123.01)S(-129.49)T(-136.36)T(-142.64)VGAVK	10	4	0.67724	100620000	0	100620000	0	NaN	839	211	1271	1271	254;558	312;313;692;693	505;1100	1167;2548;2549;2550;2551	505	1167	21427	505	1167	21427	505	1167	21427
Q2M2I8	360	Q2M2I8	AP2-associated protein kinase 1	AAK1	0.93114	11.394	3.22275e-172	191.33	176.56	191.33	1	T	KKTQPKARLTDPIPTTETSIAPRQRPKAGQT	X;X;X;X;X;X;X;X;X;X;X;X;X;X;X;GalT_UC1;X;X;X;X;X;X;X;X;X;X;X;X;X;X;X	XXXXXXXXPPPPPPPPPPPPPPPXXXXXXXX	LT(0.001)DPIPT(0.068)T(0.931)ETSIAPR	LT(-28.64)DPIPT(-11.39)T(11.39)ET(-43.75)S(-82.64)IAPR	8	3	0.49831	28406000	28406000	0	0	NaN	845	212	360	360	301	366	577	1309;1310;1311	577	1310	39090	577	1310	39090	577	1310	39090
Q2NL68	167	Q2NL68	Proline and serine-rich protein 3	PROSER3	0.840946	10.2449	0	220.64	197.75	220.64	1	T	PEGRPHTAVPTAVNVTSASHAVAPLQEIKQN	X;X;X;X;X;X;X;X;X;X;X;X;X;X;X;GalT_UC1;X;X;X;X;X;X;X;X;X;X;X;X;X;X;X	XXXXPPPPPPPPPPPPPPPPPPPPPPPPPXX	PHTAVPT(0.079)AVNVT(0.841)S(0.079)ASHAVAPLQEIK	PHT(-58.64)AVPT(-10.24)AVNVT(10.24)S(-10.24)AS(-39.86)HAVAPLQEIK	12	4	0.15657	25223000	25223000	0	0	2.6765	847	213	167	167	363	441	686	1533;1534	686	1534	39412	686	1534	39412	686	1534	39412
Q2TAL8	364	Q2TAL8	Glutamine-rich protein 1	QRICH1	0.989677	20.3759	0.00209135	67.563	46.706	67.563	1	T	LAAVKLEDDKEKMVGTTSVVKNSHEEVVQTL	X;X;X;X;X;X;X;X;X;X;X;X;X;X;X;GalT_UC1;X;X;X;X;X;X;X;X;X;X;X;X;X;X;X	XXXXXXXXXXXXPPPPPPPPPXXXXXXXXXX	MVGT(0.99)T(0.009)S(0.001)VVK	MVGT(20.38)T(-20.38)S(-29)VVK	4	3	-0.027636	10026000	10026000	0	0	NaN	848	214	364	364	319	392	613	1371	613	1371	9109	613	1371	9109	613	1371	9109
Q3MJ13	212	Q3MJ13	WD repeat-containing protein 72	WDR72	0.983408	17.7283	0.0282429	49.368	20.069	49.368	1	S	QEKQDVYEKESKFLESLNCQTIRFCTYTERL	X;X;X;X;X;X;X;X;X;X;X;X;X;X;X;GalT_UC1;X;X;X;X;X;X;X;X;X;X;X;X;X;X;X	XXXXXXXXXXXXPPPPPPPPPPPXXXXXXXX	FLES(0.983)LNCQT(0.017)IR	FLES(17.73)LNCQT(-17.73)IR	4	3	3.9852	0	0	0	0	NaN	297	215	212	212	134	167	270	672	270	672	60682	270	672	60682	270	672	60682
Q4KMP7	43	Q4KMP7	TBC1 domain family member 10B	TBC1D10B	0.99261	21.2884	3.59864e-294	213.93	204.7	121.25	1	T	SRAGPVVVVAPGPPVTTATSAPVTLVAPGEA	X;X;X;X;X;X;X;X;X;X;X;X;X;X;X;GalT_UC1;X;X;X;X;X;X;X;X;X;X;X;X;X;X;X	XXPPPPPPPPPPPPPPPPPPPPPPPPPPPPP	AGPVVVVAPGPPVT(0.993)T(0.007)ATSAPVTLVAPGEAR	AGPVVVVAPGPPVT(21.29)T(-21.29)AT(-49.55)S(-62.31)APVT(-89.68)LVAPGEAR	14	3	-0.11865	265230000	265230000	0	0	NaN	849	216	43	43	11	13	22;23	58;59;60;61;62;63	23	63	74444	22	61	74517	22	61	74517
Q52LR7	750	Q52LR7	Enhancer of polycomb homolog 2	EPC2	0.895872	9.34851	0.000215032	70.908	42.704	70.908	1	T	NVSVVSPVNVHINTRTSAPSPTALKLATVAA	X;X;X;X;X;X;X;X;X;X;X;X;X;X;X;GalT_UC1;X;X;X;X;X;X;X;X;X;X;X;X;X;X;X	XXXXXXXXXXXXXXXPPPPPPPPPPXXXXXX	T(0.896)S(0.104)APSPTALK	T(9.35)S(-9.35)APS(-43.79)PT(-53.04)ALK	1	3	0.43058	34409000	34409000	0	0	NaN	850	217	750	750	611	759	1201;1202	2841;2842	1201	2841	8373	1201	2841	8373	1201	2841	8373
Q53ET0	504	Q53ET0	CREB-regulated transcription coactivator 2	CRTC2	0.999969	45.185	6.48041e-22	92.993	78.093	92.993	1	S	SSPSLVLPTQPHTPKSLQQPGLPSQSCSVQS	X;X;X;X;X;X;X;X;X;X;X;X;X;X;X;GalT_UC1;X;X;X;X;X;X;X;X;X;X;X;X;X;X;X	XXXXXXXXXXXXXXXPPPPPPPPPPPPPPPP	S(1)LQQPGLPSQSCSVQSSGGQPPGR	S(45.18)LQQPGLPS(-45.18)QS(-60.29)CS(-67.06)VQS(-83.53)S(-87.46)GGQPPGR	1	4	-0.19476	13214000	13214000	0	0	NaN	298	218	504	504	466	572	885	2020;2021	885	2021	26104	885	2021	26104	885	2021	26104
Q58A45	289	Q58A45	PAB-dependent poly(A)-specific ribonuclease subunit PAN3	PAN3	0.966805	17.435	0.00207669	57.52	45.16	57.52	1	T	WWNRVTENNLQTPNPTASEFIPKGGSTSRLS	X;X;X;X;X;X;X;X;X;X;X;X;X;X;X;GalT_UC1;X;X;X;X;X;X;X;X;X;X;X;X;X;X;X	XXXXPPPPPPPPPPPPPPPPPPPXXXXXXXX	VT(0.003)ENNLQT(0.013)PNPT(0.967)AS(0.017)EFIPK	VT(-25.34)ENNLQT(-18.74)PNPT(17.43)AS(-17.43)EFIPK	12	3	0.60584	21943000	21943000	0	0	NaN	852	219	289	289	703	871	1357	3219	1357	3219	42947	1357	3219	42947	1357	3219	42947
Q5H9F3	641	Q5H9F3	BCL-6 corepressor-like protein 1	BCORL1	0.999943	43.8403	0.000261566	52.887	44.99	52.887	1	T	SKSNRQKLPLPNQRKTPPMPVLTPVHTSSKA	X;X;X;X;X;X;X;X;X;X;X;X;X;X;X;GalT_UC1;X;X;X;X;X;X;X;X;X;X;X;X;X;X;X	XXXXXXXXXXXXXXPPPPPPPPPPPPPPPPX	KT(1)PPMPVLTPVHTSSK	KT(43.84)PPMPVLT(-43.84)PVHT(-52.88)S(-52.88)S(-52.88)K	2	3	-0.10383	9359000	9359000	0	0	NaN	853	220	641	641	255;595	314;740	506	1168	506	1168	17113	506	1168	17113	506	1168	17113
Q5H9F3	652	Q5H9F3	BCL-6 corepressor-like protein 1	BCORL1	0.914554	10.729	1.8578e-06	78.763	56.289	78.763	1	T	NQRKTPPMPVLTPVHTSSKALLSTVLSRSQR	X;X;X;X;X;X;X;X;X;X;X;X;X;X;X;GalT_UC1;X;X;X;X;X;X;X;X;X;X;X;X;X;X;X	XXXXPPPPPPPPPPPPPPPXXXXXXXXXXXX	TPPMPVLT(0.001)PVHT(0.915)S(0.077)S(0.007)K	T(-55.96)PPMPVLT(-30.65)PVHT(10.73)S(-10.73)S(-20.96)K	12	4	0.14008	9425100	9425100	0	0	NaN	854	220	652	652	255;595	314;740	1175	2772;2773	1175	2773	26227	1175	2773	26227	1175	2773	26227
Q5JSZ5	1801	Q5JSZ5	Protein PRRC2B	PRRC2B	0.916373	10.473	3.55941e-78	142.19	130.98	142.19	1	S	FGVSPKDSDFSLPPGSASGPTGSPVVKLQDA	X;X;X;X;X;X;X;X;X;X;X;X;X;X;X;GalT_UC1;X;X;X;X;X;X;X;X;X;X;X;X;X;X;X	XXXXXXPPPPPPPPPPPPPPPPPPPPPXXXX	DS(0.001)DFS(0.082)LPPGS(0.916)ASGPTGSPVVK	DS(-28.18)DFS(-10.47)LPPGS(10.47)AS(-42.48)GPT(-85.29)GS(-108.22)PVVK	10	3	0.27645	80390000	80390000	0	0	9.6108	303	222	1801	1801	89	112	179	455;456;457;458;459;460;461;462;463;464;465;466	179	456	46088	179	456	46088	179	456	46088
Q5JSZ5	1982	Q5JSZ5	Protein PRRC2B	PRRC2B	0.99997	45.2789	1.66893e-136	170.56	146.72	170.56	1	S	LQAQAQLGLRGGLPVSQSQEIFSSLQPFRSQ	X;X;X;X;X;X;X;X;X;X;X;X;X;X;X;GalT_UC1;X;X;X;X;X;X;X;X;X;X;X;X;X;X;X	XXXXXXXXXXPPPPPPPPPPPPPPPPPPPXX	GGLPVS(1)QSQEIFSSLQPFR	GGLPVS(45.28)QS(-45.28)QEIFS(-141.07)S(-158.71)LQPFR	6	3	0.052321	214280000	214280000	0	0	NaN	304	222	1982	1982	156	192	302;303;304	732;733;734;735;736;737	302	735	75493	302	735	75493	302	735	75493
Q5T1R4	516	Q5T1R4	Transcription factor HIVEP3	HIVEP3	0.999013	30.1367	2.42439e-17	67.364	59.395	67.364	1	T	KSSLYREPLSSHSEKTKPEQSLLSLQHPPST	X;X;X;X;X;X;X;X;X;X;X;X;X;X;X;GalT_UC1;X;X;X;X;X;X;X;X;X;X;X;X;X;X;X	XXXXXXXXXXXXXXXPPPPPPPPPPPPPPPP	T(0.999)KPEQS(0.001)LLSLQHPPSTAPPVPLLR	T(30.14)KPEQS(-30.14)LLS(-48.04)LQHPPS(-57.4)T(-57.4)APPVPLLR	1	4	0.30957	11055000	11055000	0	0	NaN	863	226	516	516	574	712	1129	2643;2644	1129	2643	55698	1129	2643	55698	1129	2643	55698
Q5T6F2	633	Q5T6F2	Ubiquitin-associated protein 2	UBAP2	0.777904	5.89803	8.47342e-10	79.346	63.227	79.346	1	S	DQSSVHNRIPYQSPVSSSESAPGTIMNGHGG	X;X;X;X;X;X;X;X;X;X;X;X;X;X;X;GalT_UC1;X;X;X;X;X;X;X;X;X;X;X;X;X;X;X	XXXXXXXXPPPPPPPPPPPPPPPPPPPPPPP	IPYQS(0.2)PVS(0.778)S(0.021)S(0.001)ESAPGTIMNGHGGGR	IPYQS(-5.9)PVS(5.9)S(-15.67)S(-30)ES(-36.64)APGT(-54.19)IMNGHGGGR	8	3	-0.85841	7926300	7926300	0	0	NaN	311	227	633	633	223	274	439	1042	439	1042	30015	439	1042	30015	439	1042	30015
Q5T6F2	1006	Q5T6F2	Ubiquitin-associated protein 2	UBAP2	0.914273	10.3241	3.81131e-108	153.23	136.7	153.23	1	S	PNKSAGSGPGKGVSVSSSTTGLPDMTGSVYN	X;X;X;X;X;X;X;X;X;X;X;X;X;X;X;GalT_UC1;X;X;X;X;X;X;X;X;X;X;X;X;X;X;X	XXXXXXXXXXXPPPPPPPPPPPPPPPPPPPP	GVS(0.085)VS(0.914)S(0.001)STTGLPDMTGSVYNK	GVS(-10.32)VS(10.32)S(-30.21)S(-57.57)T(-57.57)T(-73.84)GLPDMT(-131.39)GS(-141.5)VYNK	5	3	-0.094939	378300000	378300000	0	0	NaN	310	227	1006	1006	182	223	346	818;819	346	819	44797	346	819	44797	346	819	44797
Q5VT52	396	Q5VT52	Regulation of nuclear pre-mRNA domain-containing protein 2	RPRD2	0.759925	5.01749	1.93564e-203	196.7	161.04	159.08	1	S	SKIIVEDRKEKPAEKSAVSTSVPTKPTENIS	X;X;X;X;X;X;X;X;X;X;X;X;X;X;X;GalT_UC1;X;X;X;X;X;X;X;X;X;X;X;X;X;X;X	XXXXXXXXXXXXXXXPPPPPPPPPPPPPPPP	S(0.76)AVS(0.239)T(0.001)SVPTKPTENISK	S(5.02)AVS(-5.02)T(-30.18)S(-53.94)VPT(-86.67)KPT(-115.49)ENIS(-138.85)K	1	4	-0.22042	40630000	40630000	0	0	0.54715	315	228	396	396	440	539;540	827	1870;1871	827	1871	12130	829	1877	13506	829	1877	13506
Q5VT52	399	Q5VT52	Regulation of nuclear pre-mRNA domain-containing protein 2	RPRD2	0.950093	12.786	6.71149e-204	196.7	161.04	196.57	1;2	S	IVEDRKEKPAEKSAVSTSVPTKPTENISKAS	X;X;X;X;X;X;X;X;X;X;X;X;X;X;X;GalT_UC1;GalT_UC1;X;X;X;X;X;X;X;X;X;X;X;X;X;X	XXXXXXXXXXXXPPPPPPPPPPPPPPPPPXX	S(0.053)AVS(0.95)T(0.994)S(0.003)VPTKPTENISK	S(-12.79)AVS(12.79)T(25.28)S(-25.28)VPT(-72.27)KPT(-112.09)ENIS(-137.9)K	4	4	0.46281	594340000	94112000	500230000	0	8.0036	316	228	399	399	440	539;540	825;826;830;831;832	1866;1867;1868;1869;1879;1880;1881;1882	832	1881	9223	829	1877	13506	832	1881	9223
Q5VT52	400	Q5VT52	Regulation of nuclear pre-mRNA domain-containing protein 2	RPRD2	0.994236	25.2839	6.71149e-204	196.57	196.57	196.57	2	T	VEDRKEKPAEKSAVSTSVPTKPTENISKASS	X;X;X;X;X;X;X;X;X;X;X;X;X;X;GalT_UC1;GalT_UC1;X;X;X;X;X;X;X;X;X;X;X;X;X;X;X	XXXXXXXXXXXPPPPPPPPPPPPPPPPPXXX	S(0.053)AVS(0.95)T(0.994)S(0.003)VPTKPTENISK	S(-12.79)AVS(12.79)T(25.28)S(-25.28)VPT(-72.27)KPT(-112.09)ENIS(-137.9)K	5	4	0.46281	500230000	0	500230000	0	6.7363	866	228	400	400	440	539;540	831;832	1880;1881;1882	832	1881	9223	832	1881	9223	832	1881	9223
Q5VT52	422	Q5VT52	Regulation of nuclear pre-mRNA domain-containing protein 2	RPRD2	0.962587	15.6186	3.93023e-05	68.481	57.676	68.481	1	T	TENISKASSCTPVPVTMTATPPLPKPVNTSL	X;X;X;X;X;X;X;X;X;X;X;X;X;X;X;GalT_UC1;X;X;X;X;X;X;X;X;X;X;X;X;X;X;X	XXXXXXPPPPPPPPPPPPPPPPPPPXXXXXX	AS(0.005)S(0.005)CT(0.026)PVPVT(0.963)MT(0.001)ATPPLPK	AS(-22.86)S(-22.86)CT(-15.62)PVPVT(15.62)MT(-29.7)AT(-45.62)PPLPK	10	3	-0.032734	78340000	78340000	0	0	11.663	865	228	422	422	50	66	120	355;356	120	356	48007	120	356	48007	120	356	48007
Q5VT52	604	Q5VT52	Regulation of nuclear pre-mRNA domain-containing protein 2	RPRD2	0.867872	11.3664	4.31511e-92	146.36	133.87	146.36	1	T	SFNYSPNSSTSEVSSTSASKASIGQSPGLPS	X;X;X;X;X;X;X;X;X;X;X;X;X;X;X;GalT_UC1;X;X;X;X;X;X;X;X;X;X;X;X;X;X;X	PPPPPPPPPPPPPPPPPPPPXXXXXXXXXXX	SFNYSPNSSTSEVSS(0.063)T(0.868)S(0.063)AS(0.005)K	S(-125.31)FNYS(-112.95)PNS(-112.95)S(-112.95)T(-90.77)S(-81.13)EVS(-33.12)S(-11.37)T(11.37)S(-11.37)AS(-22.41)K	16	3	0.2725	11799000	11799000	0	0	NaN	867	228	604	604	445	546	839	1891;1892	839	1892	18240	839	1892	18240	839	1892	18240
Q5VT52	991	Q5VT52	Regulation of nuclear pre-mRNA domain-containing protein 2	RPRD2	0.91833	10.5105	2.32844e-215	198.95	178.75	198.95	1	S	SPQNTLAAPTGHPPTSGVEKVLASTISTTST	X;X;X;X;X;X;X;X;X;X;X;X;X;X;X;GalT_UC1;X;X;X;X;X;X;X;X;X;X;X;X;X;X;X	PPPPPPPPPPPPPPPPPPPPXXXXXXXXXXX	SLFSPQNTLAAPTGHPPT(0.082)S(0.918)GVEK	S(-157.24)LFS(-163.25)PQNT(-109.1)LAAPT(-46.57)GHPPT(-10.51)S(10.51)GVEK	19	4	-0.0040971	38193000	38193000	0	0	NaN	317	228	991	991	462	568	880	2011;2012;2013;2014	880	2013	38581	880	2013	38581	880	2013	38581
Q5VTB9	53	Q5VTB9	E3 ubiquitin-protein ligase RNF220	RNF220	1	59.9076	0.000973707	59.908	42.994	59.908	1	S	ASIPCQQPRPFGVPVSVDKDVHIPFTNGSYT	X;X;X;X;X;X;X;X;X;X;X;X;X;X;X;GalT_UC1;X;X;X;X;X;X;X;X;X;X;X;X;X;X;X	XXXXXXXXXPPPPPPPPPPXXXXXXXXXXXX	PFGVPVS(1)VDK	PFGVPVS(59.91)VDK	7	3	-0.69416	0	0	0	0	NaN	318	229	53	53	357	435	679	1512	679	1512	29696	679	1512	29696	679	1512	29696
Q5VWN6	969	Q5VWN6	Protein FAM208B	FAM208B	0.923181	10.7987	4.85455e-62	140.14	117.34	140.14	1	S	EEIVQPLDSTRVASYSGTVTQATFTRTYDGP	X;X;X;X;X;X;X;X;X;X;X;X;X;X;X;GalT_UC1;X;X;X;X;X;X;X;X;X;X;X;X;X;X;X	XXXXXXXXXXXPPPPPPPPPPPPPPPXXXXX	VAS(0.077)YS(0.923)GTVTQATFTR	VAS(-10.8)YS(10.8)GT(-50.18)VT(-82.34)QAT(-109.6)FT(-124.26)R	5	3	-1.2046	45117000	45117000	0	0	NaN	320	230	969	969	653	812	1274	2996;2997	1274	2997	23805	1274	2997	23805	1274	2997	23805
Q5VWN6	1150	Q5VWN6	Protein FAM208B	FAM208B	0.999914	41.6903	1.09271e-43	128.03	108.98	128.03	1	S	DKAVCSLQKETPLPVSLPSDKTMVMEALSLA	X;X;X;X;X;X;X;X;X;X;X;X;X;X;X;GalT_UC1;X;X;X;X;X;X;X;X;X;X;X;X;X;X;X	XXXXXXXXXPPPPPPPPPPPPXXXXXXXXXX	ETPLPVS(1)LPSDK	ET(-41.69)PLPVS(41.69)LPS(-47.28)DK	7	3	0.054316	29583000	29583000	0	0	NaN	319	230	1150	1150	118	146	236	585;586;587;588;589	236	588	38298	236	588	38298	236	588	38298
Q5VWN6	1595	Q5VWN6	Protein FAM208B	FAM208B	0.917853	11.398	3.25157e-299	225.85	210.93	225.85	1	T	NVIENKSLSDTLVSTTAPSGIVNVSVKQQTS	X;X;X;X;X;X;X;X;X;X;X;X;X;X;X;GalT_UC1;X;X;X;X;X;X;X;X;X;X;X;X;X;X;X	XXXXXXPPPPPPPPPPPPPPPPPPPPPXXXX	SLS(0.005)DT(0.005)LVS(0.005)T(0.067)T(0.918)APSGIVNVSVK	S(-33.53)LS(-22.58)DT(-22.58)LVS(-22.58)T(-11.4)T(11.4)APS(-65.04)GIVNVS(-136.54)VK	10	3	-0.081901	21093000	21093000	0	0	NaN	870	230	1595	1595	467	573	886	2022;2023	886	2023	61371	886	2023	61371	886	2023	61371
Q6IE81	531	Q6IE81	Protein Jade-1	JADE1	1	41.3778	0.0311388	41.378	26.435	41.378	1	T	KRSVCKVQEQIFNLYTKLLEQERVSGVPSSC	X;X;X;X;X;X;X;X;X;X;X;X;X;X;X;GalT_UC1;X;X;X;X;X;X;X;X;X;X;X;X;X;X;X	XXXXXXPPPPPPPPPPPXXXXXXXXXXXXXX	VQEQIFNLYT(1)K	VQEQIFNLYT(41.38)K	10	3	0.22581	25038000	25038000	0	0	NaN	872	231	531	531	691	857	1339	3167	1339	3167	12998	1339	3167	12998	1339	3167	12998
Q6MZP7	321	Q6MZP7	Protein lin-54 homolog	LIN54	0.992222	21.0825	4.88892e-83	147.18	119.56	147.18	1	S	KIAISPLKSPNKAVKSTVQTITVGGVSTSQF	X;X;X;X;X;X;X;X;X;X;X;X;X;X;X;GalT_UC1;X;X;X;X;X;X;X;X;X;X;X;X;X;X;X	XXXXXXXXXXXXXXXPPPPPPPPPPPPPPPP	S(0.992)T(0.008)VQTITVGGVSTSQFK	S(21.08)T(-21.08)VQT(-43.42)IT(-74.16)VGGVS(-128.1)T(-128.1)S(-135.71)QFK	1	3	-0.41377	6329200	6329200	0	0	NaN	325	232	321	321	533	660	1032	2374;2375	1032	2375	36553	1032	2375	36553	1032	2375	36553
Q6MZP7	368	Q6MZP7	Protein lin-54 homolog	LIN54	0.784898	9.20953	8.04561e-106	152.06	140.6	152.06	1	S	VPGSKFHYVRLVTATSASSSTQPVSQNPSTN	X;X;X;X;X;X;X;X;X;X;X;X;GalT_UC1;X;X;GalT_UC1;X;X;X;X;X;X;X;X;X;X;X;X;X;X;X	XXXXXXXXXXPPPPPPPPPPPPPPPPPPPPP	LVT(0.002)AT(0.012)S(0.785)AS(0.094)S(0.094)S(0.012)T(0.002)QPVSQNPSTNTQPLQQAK	LVT(-27.02)AT(-18.22)S(9.21)AS(-9.21)S(-9.21)S(-18.22)T(-27.02)QPVS(-60.05)QNPS(-89.28)T(-89.28)NT(-114.12)QPLQQAK	6	3	-0.32901	11397000	11397000	0	0	NaN	321	232	368	368	306	372;373	584	1323;1324	584	1324	27140	584	1324	27140	584	1324	27140
Q6NXT4	367	Q6NXT4	Zinc transporter 6	SLC30A6	0.815494	9.84626	1.58872e-12	61.415	53.326	61.415	1	T	NFSDHHVIPMPLLKGTDDLNPVTSTPAKPSS	X;X;X;X;X;X;X;X;X;X;X;X;X;X;X;GalT_UC1;X;X;X;X;X;X;X;X;X;X;X;X;X;X;X	XXXXXXXXXXXXXXPPPPPPPPPPPPPPPPP	GT(0.815)DDLNPVT(0.084)S(0.084)T(0.013)PAKPS(0.001)S(0.001)PPPEFSFNTPGK	GT(9.85)DDLNPVT(-9.85)S(-9.85)T(-18.1)PAKPS(-27.5)S(-27.5)PPPEFS(-49.42)FNT(-54.53)PGK	2	3	-0.86876	14469000	14469000	0	0	NaN	875	233	367	367	175	214	333	791;792	333	791	51885	333	791	51885	333	791	51885
Q6P4R8	841	Q6P4R8	Nuclear factor related to kappa-B-binding protein	NFRKB	0.984292	18.1604	0.0187428	44.203	17.689	44.203	1	T	TLPQMPAGPQIRVPATATQTKVVPQTVMATV	X;X;X;X;X;X;X;X;X;X;X;X;X;X;X;GalT_UC1;X;X;X;X;X;X;X;X;X;X;X;X;X;X;X	XXXXXXXXXXXXPPPPPPPPPXXXXXXXXXX	VPAT(0.984)AT(0.015)QT(0.001)K	VPAT(18.16)AT(-18.16)QT(-31.65)K	4	3	0.90247	114220000	114220000	0	0	NaN	883	234	841	841	678	844	1326	3144	1326	3144	4263	1326	3144	4263	1326	3144	4263
Q6P4R8	881	Q6P4R8	Nuclear factor related to kappa-B-binding protein	NFRKB	0.957494	14.0287	8.75275e-109	157.91	145.35	157.91	1	S	TVQRPGPGQTGLTVTSLPATASPVSKPATSS	X;X;X;X;X;X;X;X;X;X;X;X;X;X;X;GalT_UC1;X;X;X;X;X;X;X;X;X;X;X;X;X;X;X	XXXXPPPPPPPPPPPPPPPPPPPPPPXXXXX	PGPGQTGLT(0.005)VT(0.038)S(0.957)LPATASPVSK	PGPGQT(-55.55)GLT(-23.15)VT(-14.03)S(14.03)LPAT(-62.64)AS(-73.87)PVS(-93.23)K	12	3	0.057396	94705000	94705000	0	0	NaN	330	234	881	881	361	439	684	1525;1526;1527	684	1526	43830	684	1526	43830	684	1526	43830
Q6P4R8	1067	Q6P4R8	Nuclear factor related to kappa-B-binding protein	NFRKB	1	98.6338	3.23613e-13	98.634	98.634	98.634	1	S	EASSSAFRLMPALGVSVADQKGKSTVASSEA	X;X;X;X;X;X;X;X;X;X;X;X;X;X;X;GalT_UC1;X;X;X;X;X;X;X;X;X;X;X;X;X;X;X	XXXXXXXXPPPPPPPPPPPPPXXXXXXXXXX	LMPALGVS(1)VADQK	LMPALGVS(98.63)VADQK	8	3	0.50688	7728700	7728700	0	0	NaN	329	234	1067	1067	282	347	554	1271	554	1271	35820	554	1271	35820	554	1271	35820
Q6P4R8	1130	Q6P4R8	Nuclear factor related to kappa-B-binding protein	NFRKB	0.980427	17.0264	6.79789e-181	186.11	166.82	186.11	1	S	ASVASGSGTVHTSAVSLPSMNAAVSKTVAVA	X;X;X;X;X;X;X;X;X;X;X;X;X;X;X;GalT_UC1;X;X;X;X;X;X;X;X;X;X;GalT_UC1;X;X;X;X	PPPPPPPPPPPPPPPPPPPPPPPPPPXXXXX	QGASVASGSGTVHTSAVS(0.98)LPS(0.019)MNAAVSK	QGAS(-134.29)VAS(-113.8)GS(-106.42)GT(-74.46)VHT(-57.09)S(-38.87)AVS(17.03)LPS(-17.03)MNAAVS(-63.09)K	18	4	0.019509	22576000	22576000	0	0	NaN	331	234	1130	1130	406	494	759	1710;1711	759	1711	35935	759	1711	35935	759	1711	35935
Q6P4R8	1141	Q6P4R8	Nuclear factor related to kappa-B-binding protein	NFRKB	1	95.7383	0	290.32	268.9	290.32	1	T	TSAVSLPSMNAAVSKTVAVASGAASTPISIS	X;X;X;X;GalT_UC1;X;X;X;X;X;X;X;X;X;X;GalT_UC1;X;X;X;X;X;X;X;X;X;X;X;X;X;X;X	XXXXXXXXXXXXXXXPPPPPPPPPPPPPPPP	T(1)VAVASGAASTPISISTGAPTVR	T(95.74)VAVAS(-95.74)GAAS(-194.17)T(-200.4)PIS(-233.97)IS(-265.31)T(-269.45)GAPT(-284.71)VR	1	3	0.0067331	133410000	133410000	0	0	16.715	882	234	1141	1141	635	790	1246;1247	2930;2931;2932;2933;2934;2935;2936;2937;2938;2939;2940;2941;2942;2943	1247	2939	46918	1247	2939	46918	1247	2939	46918
Q6P4R8	1273	Q6P4R8	Nuclear factor related to kappa-B-binding protein	NFRKB	0.999781	37.14	1.52637e-137	176.89	163.19	169.19	1	T	QVRIQTVPASHLQQGTASGSSKAVSTVVVTT	X;X;X;X;X;X;X;X;X;X;X;X;X;X;X;GalT_UC1;X;X;X;X;X;X;X;X;X;GalT_UC1;X;X;X;X;X	XXXPPPPPPPPPPPPPPPPPPPXXXXXXXXX	IQTVPASHLQQGT(1)ASGSSK	IQT(-100.71)VPAS(-102.22)HLQQGT(37.14)AS(-37.14)GS(-48.89)S(-48.89)K	13	3	0.16472	135650000	135650000	0	0	9.9065	878	234	1273	1273	224	275	441	1047;1048;1049	441	1048	8391	440	1044	8318	440	1044	8318
Q6PIU2	289	Q6PIU2	Neutral cholesterol ester hydrolase 1	NCEH1	0.995357	23.3117	1.90251e-56	139.86	108.43	139.86	1	T	LDVEEAAAVRARLNWTSLLPASFTKNYKPVV	X;X;X;X;X;X;X;X;X;X;X;X;X;X;X;GalT_UC1;X;X;X;X;X;X;X;X;X;X;X;X;X;X;X	XXXXXXXXXXXXPPPPPPPPPPPPPXXXXXX	LNWT(0.995)S(0.005)LLPASFTK	LNWT(23.31)S(-23.31)LLPAS(-92.15)FT(-126.11)K	4	3	-0.36029	9028700	9028700	0	0	NaN	884	235	289	289	285	350	558	1276	558	1276	78612	558	1276	78612	558	1276	78612
Q6PJT7	132	Q6PJT7	Zinc finger CCCH domain-containing protein 14	ZC3H14	0.889545	12.084	6.46869e-05	88.948	58.336	79.116	1	S	LAIPSARPEKRDSRVSTSSQESKTTNVRQTY	X;X;X;X;X;X;X;X;X;X;X;X;X;X;X;GalT_UC1;X;X;X;X;X;X;X;X;X;X;X;X;X;X;X	XXXXXXXXXXXXXXPPPPPPPPPXXXXXXXX	VS(0.89)T(0.055)S(0.055)SQESK	VS(12.08)T(-12.08)S(-12.08)S(-34.03)QES(-60.68)K	2	2	-0.36651	20641000	20641000	0	0	NaN	335	236	132	132	698	864	1347;1348	3187;3188;3189;3190;3191;3192;3193;3194;3195;3196;3197;3198;3199;3200;3201;3202;3203	1348	3195	540	1347	3188	598	1347	3188	598
Q6PJT7	220	Q6PJT7	Zinc finger CCCH domain-containing protein 14	ZC3H14	1	157.54	9.71599e-103	163.38	134.76	163.38	1	S	YGSSRPSIEIYRPPASRNADSGVHLNRLQFQ	X;X;X;X;X;X;X;X;X;X;X;X;X;X;X;GalT_UC1;X;X;X;X;X;X;X;X;X;X;X;X;X;X;X	XXXXXPPPPPPPPPPPPXXXXXXXXXXXXXX	PSIEIYRPPAS(1)R	PS(-157.54)IEIYRPPAS(157.54)R	11	4	0.031453	27531000	27531000	0	0	NaN	333	236	220	220	380	464	720	1630;1631;1632;1633	720	1632	17606	720	1632	17606	720	1632	17606
Q6VMQ6	706	Q6VMQ6	Activating transcription factor 7-interacting protein 1	ATF7IP	0.953631	13.4264	1.42595e-16	78.128	68.411	78.128	1	S	NAGTVRQMLESKRNVSESAPPSFQTPVNTVS	X;X;X;X;X;X;X;X;X;X;X;X;X;X;X;GalT_UC1;X;X;X;X;X;X;X;X;X;X;X;X;X;X;X	XXXXXXXXXXXXXPPPPPPPPPPPPPPPPPP	NVS(0.954)ES(0.043)APPS(0.002)FQTPVNTVSSTNLVTPPAVVSSQPK	NVS(13.43)ES(-13.43)APPS(-25.88)FQT(-37.28)PVNT(-37.28)VS(-37.28)S(-46.35)T(-46.35)NLVT(-60.47)PPAVVS(-76.65)S(-76.65)QPK	3	4	0.1796	16687000	16687000	0	0	NaN	338	239	706	706	346	424	664	1477;1478	664	1478	71882	664	1478	71882	664	1478	71882
Q6VMQ6	719	Q6VMQ6	Activating transcription factor 7-interacting protein 1	ATF7IP	0.986381	19.521	0	214.49	206.52	214.49	1	T	NVSESAPPSFQTPVNTVSSTNLVTPPAVVSS	X;X;X;X;X;X;X;X;X;X;X;X;X;X;X;GalT_UC1;X;X;X;X;X;X;X;X;X;X;X;X;X;X;X	PPPPPPPPPPPPPPPPPPPPPPPPPPPPPPP	NVSESAPPSFQT(0.001)PVNT(0.986)VS(0.011)S(0.001)TNLVTPPAVVSSQPK	NVS(-129.3)ES(-114.53)APPS(-74.08)FQT(-29.04)PVNT(19.52)VS(-19.52)S(-29.04)T(-38.39)NLVT(-65.42)PPAVVS(-136.36)S(-143.19)QPK	16	4	0.31126	346560000	346560000	0	0	NaN	891	239	719	719	346	424	662;665	1470;1471;1472;1473;1474;1475;1479	662	1471	67356	662	1471	67356	662	1471	67356
Q6VMQ6	834	Q6VMQ6	Activating transcription factor 7-interacting protein 1	ATF7IP	0.823276	9.73117	3.06491e-09	59.324	53.294	59.324		S	VQSPPTVSGLTKNPVSLPSLPNPTKPNNVPS	X;X;X;X;X;X;X;X;X;X;X;X;X;X;X;GalT_UC1;X;X;X;X;X;X;X;X;X;X;X;X;X;X;X	XXXXXXXXXXXXPPPPPPPPPPPPPPPPPPP	NPVS(0.823)LPS(0.088)LPNPT(0.088)KPNNVPS(0.001)VPSPSIQR	NPVS(9.73)LPS(-9.73)LPNPT(-9.73)KPNNVPS(-27.5)VPS(-42.52)PS(-42.52)IQR	4	3	-0.088258	16973000	16973000	0	0	NaN	337	239	834	834	337	415	648	1446	648	1446	58884	648	1446	58884	648	1446	58884
Q6VMQ6	842	Q6VMQ6	Activating transcription factor 7-interacting protein 1	ATF7IP	0.999946	42.6991	0	288.82	274.93	288.82	1	T	GLTKNPVSLPSLPNPTKPNNVPSVPSPSIQR	X;X;X;X;X;X;X;X;X;X;X;X;X;X;X;GalT_UC1;X;X;X;X;X;X;X;X;X;X;X;X;X;X;X	XXXXPPPPPPPPPPPPPPPPPPPPPPPPPPP	NPVSLPSLPNPT(1)KPNNVPSVPSPSIQR	NPVS(-71.87)LPS(-42.7)LPNPT(42.7)KPNNVPS(-96.2)VPS(-169.21)PS(-185.42)IQR	12	4	0.2627	64402000	64402000	0	0	NaN	890	239	842	842	337	415	647	1440;1441;1442;1443;1444;1445	647	1443	58896	647	1443	58896	647	1443	58896
Q6VMQ6	869	Q6VMQ6	Activating transcription factor 7-interacting protein 1	ATF7IP	0.924252	10.8642	0	243.41	230.92	243.41	1	T	SIQRNPTASAAPLGTTLAVQAVPTAHSIVQA	X;X;X;X;X;X;X;X;X;X;X;X;X;X;X;GalT_UC1;X;X;X;X;X;X;X;X;X;X;X;X;X;X;X	XXXXPPPPPPPPPPPPPPPPPPPPPPPPPPP	NPTASAAPLGT(0.076)T(0.924)LAVQAVPTAHSIVQATR	NPT(-106.87)AS(-90.77)AAPLGT(-10.86)T(10.86)LAVQAVPT(-100.56)AHS(-136.71)IVQAT(-162.09)R	12	4	0.19602	40428000	40428000	0	0	NaN	889	239	869	869	336	414	646	1438;1439	646	1439	56565	646	1439	56565	646	1439	56565
Q6VMQ6	914	Q6VMQ6	Activating transcription factor 7-interacting protein 1	ATF7IP	0.988429	20.6188	4.99647e-12	70.453	62.139	48.229	1	S	SPSTNRGPIQMKIPISAFSTSSAAEQNSNTT	X;X;X;X;X;X;X;X;X;X;X;X;X;X;X;GalT_UC1;X;X;X;X;X;X;X;X;X;X;X;X;X;X;X	XXXXXXXXXXXXPPPPPPPPPPPPPPPPPPP	IPIS(0.988)AFS(0.009)T(0.002)S(0.001)SAAEQNSNTTPR	IPIS(20.62)AFS(-20.62)T(-26.61)S(-32.13)S(-37.09)AAEQNS(-48.14)NT(-48.14)T(-48.14)PR	4	3	0.71361	36330000	36330000	0	0	NaN	336	239	914	914	220	270	429;430	1024;1025	429	1024	31881	430	1025	32200	430	1025	32200
Q6VMQ6	1066	Q6VMQ6	Activating transcription factor 7-interacting protein 1	ATF7IP	0.81159	6.34232	4.393e-12	67.168	52.859	67.168	1	T	LPVPRAPANHQVVYTTLPAPPAQAPLRGTVM	X;X;X;X;X;X;X;X;X;X;X;X;X;X;X;GalT_UC1;X;X;X;X;X;X;X;X;X;X;X;X;X;X;X	XXXXXPPPPPPPPPPPPPPPPPPPPPPXXXX	APANHQVVYT(0.188)T(0.812)LPAPPAQAPLR	APANHQVVYT(-6.34)T(6.34)LPAPPAQAPLR	11	4	-0.21806	9881200	9881200	0	0	NaN	888	239	1066	1066	24	26	39	104;105	39	104	38583	39	104	38583	39	104	38583
Q6W2J9	365	Q6W2J9	BCL-6 corepressor	BCOR	0.997283	25.6672	2.54812e-15	108.67	71.192	108.67	1	S	AADTYSEFHKHYARISTSPSVALSKPYMTVS	X;X;X;X;X;X;X;X;X;X;X;X;X;X;X;GalT_UC1;X;X;X;X;X;X;X;X;X;X;X;X;X;X;X	XXXXXXXXXXXXXXPPPPPPPPPPPXXXXXX	IS(0.997)T(0.003)SPSVALSK	IS(25.67)T(-25.67)S(-49.13)PS(-70.03)VALS(-99.48)K	2	3	0.06197	29945000	29945000	0	0	NaN	343	241	365	365	230	282	451;452	1066;1067	451	1066	13745	451	1066	13745	451	1066	13745
Q6W2J9	586	Q6W2J9	BCL-6 corepressor	BCOR	0.998429	28.0333	2.23701e-126	162.79	149.91	162.79	1	S	SPAPNANADGTKTSRSSVETTPSVIQHVGQP	X;X;X;X;X;X;X;X;X;X;X;X;X;X;X;GalT_UC1;X;X;X;X;X;X;X;X;X;X;X;X;X;X;X	XXXXXXXXXXXXXXXPPPPPPPPPPPPPPPP	S(0.998)S(0.002)VETTPSVIQHVGQPPATPAK	S(28.03)S(-28.03)VET(-62.75)T(-87.11)PS(-108.54)VIQHVGQPPAT(-156.53)PAK	1	4	-0.9987	46361000	46361000	0	0	NaN	344	241	586	586	517	638	975;976	2225;2226;2227;2228;2229;2230;2231	976	2231	27800	976	2231	27800	976	2231	27800
Q6WCQ1	178	Q6WCQ1	Myosin phosphatase Rho-interacting protein	MPRIP	0.999868	38.7919	0	344.54	317.06	344.54	1	T	EPPTPQEPGPAKVAVTSSSSSSSSSSSIPSA	X;X;X;X;X;X;X;X;X;X;X;X;X;X;X;GalT_UC1;X;X;X;X;X;X;X;X;X;X;X;X;X;X;X	XXXXXXXXXXXXPPPPPPPPPPPPPPPPPPP	VAVT(1)SSSSSSSSSSSIPSAEK	VAVT(38.79)S(-38.79)S(-63.58)S(-99.15)S(-143.57)S(-174.6)S(-212.82)S(-239.02)S(-270.4)S(-291.04)S(-308.92)S(-323.68)IPS(-337.94)AEK	4	3	0.02902	76402000	76402000	0	0	NaN	894	242	178	178	655	814	1276	3005;3006;3007;3008	1276	3006	11485	1276	3006	11485	1276	3006	11485
Q6XZF7	511	Q6XZF7	Dynamin-binding protein	DNMBP	0.995113	23.5343	0.0391522	43.544	18.095	43.544	2	T	SPQLHNLASYTKKHHTSSVYSISERLEMKPG	X;X;X;X;X;X;X;X;X;X;X;X;X;X;X;GalT_UC1;X;GalT_UC1;X;X;X;X;X;X;X;X;X;X;X;X;X	XXXXXXXXXXXXXPPPPPPPPPPPPXXXXXX	HHT(0.995)S(0.016)S(0.462)VYS(0.065)IS(0.462)ER	HHT(23.53)S(-16.13)S(0)VYS(-8.54)IS(0)ER	3	3	-0.54529	122540000	0	122540000	0	NaN	895	243	511	511	188	230	363	853	363	853	10980	363	853	10980	363	853	10980
Q6Y7W6	680	Q6Y7W6	PERQ amino acid-rich with GYF domain-containing protein 2	GIGYF2	0.999829	37.6569	2.74386e-165	188.87	144.56	188.87	1	T	TLKMRISDQNIIPSVTRSVSVPDTGSIWELQ	X;X;X;X;X;X;X;X;X;X;X;X;X;X;X;GalT_UC1;X;X;X;X;X;X;X;X;X;X;X;X;X;X;X	XXXXXPPPPPPPPPPPPXXXXXXXXXXXXXX	ISDQNIIPSVT(1)R	IS(-145.33)DQNIIPS(-37.66)VT(37.66)R	11	3	0.069627	42891000	42891000	0	0	NaN	896	244	680	680	225	277	443;444	1051;1052;1053;1054;1055;1056;1057	443	1053	33411	443	1053	33411	443	1053	33411
Q6ZU65	1003	Q6ZU65	Ubinuclein-2	UBN2	0.995531	23.6461	3.00179e-91	155.97	128.82	155.97	1;2	T	SPGNGSQGSHPLVSRTVPSTTTSSNYLAKAM	X;X;X;X;X;X;X;X;X;X;X;X;X;X;X;GalT_UC1;X;X;X;GalT_UC1;X;X;X;X;X;X;X;X;X;X;X	XXXXXXXXXXXXXXXPPPPPPPPPPPPPPXX	T(0.996)VPS(0.004)TTTSSNYLAK	T(23.65)VPS(-23.65)T(-37.99)T(-49.48)T(-77.31)S(-88.24)S(-98.62)NYLAK	1	3	-0.057505	44869000	39230000	5638800	0	NaN	898	246	1003	1003	641	798;799	1256;1257;1258	2967;2968;2969	1257	2968	14153	1257	2968	14153	1257	2968	14153
Q6ZU65	1007	Q6ZU65	Ubinuclein-2	UBN2	0.869177	8.37112	0.00288131	65.719	48.968	65.719	2	T	GSQGSHPLVSRTVPSTTTSSNYLAKAMVSQI	X;X;X;X;X;X;X;X;X;X;X;GalT_UC1;X;X;X;GalT_UC1;X;X;X;X;X;X;X;X;X;X;X;X;X;X;X	XXXXXXXXXXXPPPPPPPPPPPPPPXXXXXX	T(0.986)VPS(0.139)T(0.869)T(0.003)T(0.003)SSNYLAK	T(17.83)VPS(-8.37)T(8.37)T(-24.56)T(-24.56)S(-38.57)S(-50.13)NYLAK	5	3	-0.82504	5638800	0	5638800	0	NaN	899	246	1007	1007	641	798;799	1256	2967	1256	2967	11545	1256	2967	11545	1256	2967	11545
Q70E73	784	Q70E73	Ras-associated and pleckstrin homology domains-containing protein 1	RAPH1	0.999728	36.5589	0.00225354	64.04	48.653	64.04	1	T	IPAPLPPQAPPKPLVTIPAPTSTKTVAPVVT	X;X;X;X;X;X;X;X;X;X;X;X;X;X;X;GalT_UC1;X;X;X;X;X;X;X;X;X;X;X;X;X;X;X	XXXXXXXXXXXXPPPPPPPPPPPPXXXXXXX	PLVT(1)IPAPTSTK	PLVT(36.56)IPAPT(-36.56)S(-43.83)T(-50.23)K	4	3	0.10805	10667000	10667000	0	0	NaN	901	248	784	784	370	451	704	1580;1581	704	1580	30030	704	1580	30030	704	1580	30030
Q76L83	411	Q76L83	Putative Polycomb group protein ASXL2	ASXL2	0.998879	29.4996	1.86998e-10	100.48	66.61	100.48	1	S	PSDPKVKKTPAEQPKSMPVSEASLIRIVPVV	X;X;X;X;X;X;X;X;X;X;X;X;X;X;X;GalT_UC1;X;X;X;X;X;X;X;X;X;X;X;X;X;X;X	XXXXXXXXXXXXXXXPPPPPPPPPPPXXXXX	S(0.999)MPVS(0.001)EASLIR	S(29.5)MPVS(-29.5)EAS(-68.35)LIR	1	3	-0.3548	8005100	8005100	0	0	NaN	353	250	411	411	474	581	895	2040	895	2040	26422	895	2040	26422	895	2040	26422
Q7KZ85	1526	Q7KZ85	Transcription elongation factor SPT6	SUPT6H	0.871775	9.30479	6.36848e-26	106.58	86.471	106.58	1	S	FKDHYQDPVPGITPSSSSRTRTPASINATPA	X;X;X;X;X;X;X;X;X;X;X;X;X;X;X;GalT_UC1;X;X;X;X;X;X;X;X;X;X;X;X;X;X;X	XXPPPPPPPPPPPPPPPPPXXXXXXXXXXXX	DHYQDPVPGITPS(0.013)S(0.872)S(0.102)S(0.013)R	DHYQDPVPGIT(-39.44)PS(-18.3)S(9.3)S(-9.3)S(-18.3)R	14	4	-0.38565	92128000	92128000	0	0	NaN	354	251	1526	1526	78	101	165;166	432;433;434;435	166	435	22257	166	435	22257	166	435	22257
Q7LBC6	409	Q7LBC6	Lysine-specific demethylase 3B	KDM3B	0.955127	14.0841	5.32797e-43	94.837	77.618	94.837	1	T	LAPEVGGAENKEAGKTLEQVGQGIVASAAVV	X;X;X;X;X;X;X;X;X;X;X;X;X;X;X;GalT_UC1;X;X;X;X;X;X;X;X;X;X;GalT_UC1;X;X;X;X	XXXXXXXXXXXXXXXPPPPPPPPPPPPPPPP	T(0.955)LEQVGQGIVAS(0.998)AAVVT(0.039)T(0.008)ASSTPNTVR	T(14.08)LEQVGQGIVAS(27.47)AAVVT(-14.08)T(-21.16)AS(-56.68)S(-72.52)T(-76.62)PNT(-90.22)VR	1	4	0.35971	779440000	34609000	744830000	0	24.242	902	252	409	409	578	717;718	1138;1141	2669;2670;2671;2672;2682	1141	2682	50406	1141	2682	50406	1141	2682	50406
Q7LBC6	420	Q7LBC6	Lysine-specific demethylase 3B	KDM3B	0.997569	27.4721	5.32797e-43	100.7	91.993	94.837	1	S	EAGKTLEQVGQGIVASAAVVTTASSTPNTVR	X;X;X;X;GalT_UC1;X;X;X;X;X;X;X;X;X;X;GalT_UC1;X;X;X;X;X;X;X;X;X;X;X;X;X;X;X	XXXXPPPPPPPPPPPPPPPPPPPPPPPPPPP	T(0.955)LEQVGQGIVAS(0.998)AAVVT(0.039)T(0.008)ASSTPNTVR	T(14.08)LEQVGQGIVAS(27.47)AAVVT(-14.08)T(-21.16)AS(-56.68)S(-72.52)T(-76.62)PNT(-90.22)VR	12	4	0.35971	796250000	51412000	744830000	0	24.764	355	252	420	420	578	717;718	1137;1139;1141	2667;2668;2673;2674;2682	1141	2682	50406	1139	2673	64330	1141	2682	50406
Q7LBC6	425	Q7LBC6	Lysine-specific demethylase 3B	KDM3B	0.999999	60.3007	4.05271e-202	191.61	179.53	191.61	2	T	LEQVGQGIVASAAVVTTASSTPNTVRISDTG	X;X;X;X;X;X;X;X;X;X;X;X;X;X;X;GalT_UC1;GalT_UC1;X;X;X;X;X;X;X;X;X;X;X;X;X;X	PPPPPPPPPPPPPPPPPPPPPPPPPPXXXXX	TLEQVGQGIVASAAVVT(1)T(1)ASSTPNTVR	T(-97.38)LEQVGQGIVAS(-68.18)AAVVT(60.3)T(60.3)AS(-60.3)S(-81.96)T(-95.3)PNT(-115.46)VR	17	5	-0.13284	55451000	0	55451000	0	1.7246	903	252	425	425	578	717;718	1140	2675;2676;2677;2678;2679;2680;2681	1140	2678	50111	1140	2678	50111	1140	2678	50111
Q7LBC6	426	Q7LBC6	Lysine-specific demethylase 3B	KDM3B	0.999999	60.3007	4.05271e-202	191.61	179.53	191.61	2	T	EQVGQGIVASAAVVTTASSTPNTVRISDTGL	X;X;X;X;X;X;X;X;X;X;X;X;X;X;GalT_UC1;GalT_UC1;X;X;X;X;X;X;X;X;X;X;X;X;X;X;X	PPPPPPPPPPPPPPPPPPPPPPPPPXXXXXX	TLEQVGQGIVASAAVVT(1)T(1)ASSTPNTVR	T(-97.38)LEQVGQGIVAS(-68.18)AAVVT(60.3)T(60.3)AS(-60.3)S(-81.96)T(-95.3)PNT(-115.46)VR	18	5	-0.13284	55451000	0	55451000	0	1.7246	904	252	426	426	578	717;718	1140	2675;2676;2677;2678;2679;2680;2681	1140	2678	50111	1140	2678	50111	1140	2678	50111
Q7LBC6	654	Q7LBC6	Lysine-specific demethylase 3B	KDM3B	0.986868	19.7948	4.0764e-282	219.68	201.1	139.17	1	S	AFVEKVEHSPFSSFASQASGSSSSATTVTSK	X;X;X;X;X;X;X;X;X;X;X;X;X;X;X;GalT_UC1;X;X;X;X;X;X;X;X;X;X;X;X;X;X;X	XXXXXPPPPPPPPPPPPPPPPPPPPPPPPPP	VEHS(0.001)PFS(0.001)S(0.01)FAS(0.987)QASGSSSSATTVTSK	VEHS(-28.57)PFS(-28.57)S(-19.79)FAS(19.79)QAS(-43.82)GS(-64.39)S(-64.39)S(-74.07)S(-83.31)AT(-83.31)T(-100.35)VT(-100.35)S(-100.35)K	11	3	-0.26794	251630000	251630000	0	0	6.0221	357	252	654	654	656	815	1278;1279	3013;3014;3015;3016;3017;3018;3019;3020;3021	1278	3016	28071	1279	3021	28141	1279	3021	28141
Q7Z3K3	266	Q7Z3K3	Pogo transposable element with ZNF domain	POGZ	0.789915	7.74018	3.31051e-84	123.53	114.31	112.34		S	STPSTSTTPTATQPTSLGQLAVQSPGQSNQT	X;X;X;X;X;X;X;X;X;X;X;X;X;X;X;GalT_UC1;X;X;X;X;X;X;X;X;X;X;X;X;X;X;X	PPPPPPPPPPPPPPPPPPPPPPPPPPPPPPP	STPSTSTTPTAT(0.004)QPT(0.133)S(0.79)LGQLAVQS(0.005)PGQS(0.005)NQT(0.031)T(0.031)NPK	S(-83.01)T(-83.01)PS(-78.17)T(-67.62)S(-55.97)T(-55.97)T(-43.32)PT(-43.32)AT(-22.61)QPT(-7.74)S(7.74)LGQLAVQS(-21.97)PGQS(-21.97)NQT(-14.01)T(-14.01)NPK	16	4	-0.1044	181650000	181650000	0	0	NaN	364	254	266	266	525	649	1000	2285	1000	2285	43787	999	2282	43597	1000	2285	43787
Q7Z3K3	297	Q7Z3K3	Pogo transposable element with ZNF domain	POGZ	0.997861	30.1174	3.09878e-50	121.82	109.1	121.82	1	S	TNPKLAPSFPSPPAVSIASFVTVKRPGVTGE	X;X;X;X;X;X;X;X;X;X;X;X;X;X;X;GalT_UC1;X;X;X;X;X;X;X;X;X;X;X;X;X;X;X	XXXXPPPPPPPPPPPPPPPPPPPPXXXXXXX	LAPS(0.001)FPS(0.001)PPAVS(0.998)IASFVTVK	LAPS(-30.12)FPS(-30.12)PPAVS(30.12)IAS(-37.07)FVT(-67)VK	12	3	0.33684	80543000	80543000	0	0	25.205	362	254	297	297	260	322	521	1190;1191;1192;1193;1194;1195;1196	521	1192	82382	521	1192	82382	521	1192	82382
Q7Z3K3	361	Q7Z3K3	Pogo transposable element with ZNF domain	POGZ	0.892289	9.25814	4.35111e-30	110.98	99.13	110.98	1	T	HGSQRTSGPESSMKVTSSIPVFDLQDGGRKI	X;X;X;X;X;X;X;X;X;X;X;X;X;X;X;GalT_UC1;X;X;X;X;X;X;X;X;X;X;X;X;X;X;X	XXXXXXXXXXXXXXPPPPPPPPPPPPPPPXX	VT(0.892)S(0.106)S(0.002)IPVFDLQDGGR	VT(9.26)S(-9.26)S(-26.81)IPVFDLQDGGR	2	3	0.1621	7629500	7629500	0	0	NaN	909	254	361	361	710	880	1367	3240	1367	3240	49686	1367	3240	49686	1367	3240	49686
Q7Z3T8	626	Q7Z3T8	Zinc finger FYVE domain-containing protein 16	ZFYVE16	0.906552	9.86843	6.52742e-15	84.479	74.14	84.479		S	LGEKSTIPVQQGLPTSKSEITNQLSVSDINS	X;X;X;X;X;X;X;X;X;X;X;X;X;X;X;GalT_UC1;X;X;X;X;X;X;X;X;X;X;X;X;X;X;X	XXXXPPPPPPPPPPPPPXXXXXXXXXXXXXX	STIPVQQGLPT(0.093)S(0.907)K	S(-56.01)T(-56.01)IPVQQGLPT(-9.87)S(9.87)K	12	3	0.2559	32860000	32860000	0	0	NaN	365	255	626	626	523	647	995	2274	995	2274	20891	995	2274	20891	995	2274	20891
Q7Z434	307	Q7Z434	Mitochondrial antiviral-signaling protein	MAVS	1	83.584	1.04391e-109	168.3	151.73	168.3	1	T	NSLPSKVPTTLMPVNTVALKVPANPASVSTV	X;X;X;X;X;X;X;X;X;X;X;X;X;X;X;GalT_UC1;X;X;X;X;X;X;X;X;X;X;X;X;X;GalT_UC1;X	XXXXXXPPPPPPPPPPPPPPXXXXXXXXXXX	VPTTLMPVNT(1)VALK	VPT(-83.58)T(-83.58)LMPVNT(83.58)VALK	10	3	-0.43913	50868000	50868000	0	0	NaN	912	257	307	307	687	853	1335	3158;3159;3160;3161	1335	3159	45976	1335	3159	45976	1335	3159	45976
Q7Z434	321	Q7Z434	Mitochondrial antiviral-signaling protein	MAVS	0.896855	9.46497	1.12331e-22	101.71	83.116	101.71	1	T	NTVALKVPANPASVSTVPSKLPTSSKPPGAV	X;GalT_UC1;X;X;X;X;X;X;X;X;X;X;X;X;X;GalT_UC1;X;X;X;X;X;X;X;X;X;X;X;X;X;X;X	XXXXXXPPPPPPPPPPPPPPXXXXXXXXXXX	VPANPASVS(0.101)T(0.897)VPS(0.002)K	VPANPAS(-43.67)VS(-9.46)T(9.46)VPS(-27.32)K	10	3	0.8603	4915100	4915100	0	0	NaN	911	257	321	321	677	843	1325	3143	1325	3143	14263	1325	3143	14263	1325	3143	14263
Q7Z434	366	Q7Z434	Mitochondrial antiviral-signaling protein	MAVS	0.851189	7.57405	0.0026161	72.879	48.536	72.879	1	S	INSTRAGMVPSKVPTSMVLTKVSASTVPTDG	X;X;X;X;X;X;X;X;X;X;X;X;X;X;X;GalT_UC1;X;X;X;X;X;X;X;X;X;X;X;X;X;X;X	XXXXXXXXXXXXPPPPPPPPPXXXXXXXXXX	VPT(0.149)S(0.851)MVLTK	VPT(-7.57)S(7.57)MVLT(-52.1)K	4	3	-0.1036	60849000	60849000	0	0	NaN	370	257	366	366	685	851	1333	3155;3156	1333	3155	15154	1333	3155	15154	1333	3155	15154
Q7Z460	579	Q7Z460	CLIP-associating protein 1	CLASP1	0.884548	9.24461	0.00457419	65.038	42.298	56.432	1	S	NRPLSAKRSPTGSTTSRASTVSTKSVSTTGS	X;X;X;X;X;X;X;X;X;X;X;X;X;X;X;GalT_UC1;X;X;X;X;X;X;X;X;X;X;X;X;X;X;X	XXXXXXXXPPPPPPPPPXXXXXXXXXXXXXX	SPTGS(0.001)T(0.009)T(0.105)S(0.885)R	S(-47.7)PT(-47.4)GS(-28.23)T(-20.01)T(-9.24)S(9.24)R	8	3	0.10539	1956400	1956400	0	0	NaN	371	258	579	579	488	597	917	2108	917	2108	1331	916	2107	1483	916	2107	1483
Q7Z589	228	Q7Z589	Protein EMSY	EMSY	1	67.032	3.07372e-06	67.032	31.737	67.032	1	S	SPVVLKEVPKAVVPVSKTITVPVSGSPKMSN	X;X;X;X;X;X;X;X;X;X;X;X;X;X;X;GalT_UC1;X;X;X;GalT_UC1;X;X;X;X;X;X;X;X;X;X;X	XXXXXXXXXXPPPPPPPXXXXXXXXXXXXXX	AVVPVS(1)K	AVVPVS(67.03)K	6	3	0.22271	0	0	0	0	NaN	372	259	228	228	71	94	156	419	156	419	7218	156	419	7218	156	419	7218
Q7Z589	232	Q7Z589	Protein EMSY	EMSY	0.971163	16.8293	2.26147e-06	85.355	59.236	85.355	1	T	LKEVPKAVVPVSKTITVPVSGSPKMSNIMQS	X;X;X;X;X;X;X;X;X;X;X;GalT_UC1;X;X;X;GalT_UC1;X;X;X;X;X;X;X;X;X;X;X;X;X;X;X	XXXXXXXXXXXXXPPPPPPPPPPPXXXXXXX	T(0.009)IT(0.971)VPVS(0.02)GSPK	T(-20.53)IT(16.83)VPVS(-16.83)GS(-40.05)PK	3	3	0.0069311	46377000	46377000	0	0	NaN	925	259	232	232	573	711	1128	2641;2642	1128	2641	15301	1128	2641	15301	1128	2641	15301
Q7Z589	262	Q7Z589	Protein EMSY	EMSY	0.922727	10.7709	2.48953e-99	157.56	139.81	157.56	1	T	SIANSLPPHMSPVKITFTKPSTQTTNTTTQK	X;X;X;X;X;X;X;X;X;X;X;X;X;X;X;GalT_UC1;X;X;X;X;X;X;X;GalT_UC1;X;X;X;X;X;X;X	XXXXXXXXXXXXXXPPPPPPPPPPPPPPPPP	IT(0.923)FT(0.077)KPSTQTTNTTTQK	IT(10.77)FT(-10.77)KPS(-50.98)T(-60.29)QT(-86.28)T(-94.27)NT(-101.9)T(-104.07)T(-117.04)QK	2	4	0.27329	143770000	143770000	0	0	NaN	914	259	262	262	233	285;286	458;459;460	1076;1077;1078;1079;1080;1081;1082;1083;1084;1085;1086	459	1084	9736	459	1084	9736	459	1084	9736
Q7Z589	264	Q7Z589	Protein EMSY	EMSY	0.893927	9.37832	5.68171e-69	137.17	118.09	96.666	2	T	ANSLPPHMSPVKITFTKPSTQTTNTTTQKVI	X;X;X;X;X;X;X;X;X;X;X;X;X;X;X;GalT_UC1;X;X;X;X;X;GalT_UC1;X;X;X;X;X;X;X;X;X	XXXXXXXXXXXXPPPPPPPPPPPPPPPPPXX	IT(0.103)FT(0.894)KPS(0.003)T(0.001)QT(0.496)T(0.496)NT(0.007)TTQK	IT(-9.38)FT(9.38)KPS(-25.11)T(-28.23)QT(0)T(0)NT(-18.43)T(-35.5)T(-43.48)QK	4	3	0.71991	40672000	0	40672000	0	NaN	915	259	264	264	233	285;286	455	1071	455	1071	7917	456	1073	7926	456	1073	7926
Q7Z589	282	Q7Z589	Protein EMSY	EMSY	0.994973	23.2085	7.39964e-136	170.56	155.14	170.56	1;2	T	STQTTNTTTQKVIIVTTSPSSTFVPNILSKS	X;X;X;GalT_UC1;X;X;X;X;X;X;X;X;X;X;X;GalT_UC1;GalT_UC1;X;X;X;X;X;X;X;X;X;X;X;X;X;X	XXXXXXXXXXXPPPPPPPPPPPPPPPPPPPX	VIIVT(0.995)T(0.932)S(0.067)PS(0.002)S(0.002)T(0.002)FVPNILSK	VIIVT(23.21)T(11.74)S(-11.74)PS(-26.63)S(-26.63)T(-26.63)FVPNILS(-134.9)K	5	4	0.17462	157910000	137340000	20565000	0	8.6271	928	259	282	282	665	825;826	1291;1292	3041;3042;3043;3044;3045;3046;3047;3048;3049;3050;3051;3052;3053;3054	1291	3042	56840	1291	3042	56840	1291	3042	56840
Q7Z589	283	Q7Z589	Protein EMSY	EMSY	0.931857	11.7429	7.39964e-136	170.56	155.14	170.56	2	T	TQTTNTTTQKVIIVTTSPSSTFVPNILSKSH	X;X;GalT_UC1;X;X;X;X;X;X;X;X;X;X;X;GalT_UC1;GalT_UC1;X;X;X;X;X;X;X;X;X;X;X;X;X;X;X	XXXXXXXXXXPPPPPPPPPPPPPPPPPPPXX	VIIVT(0.995)T(0.932)S(0.067)PS(0.002)S(0.002)T(0.002)FVPNILSK	VIIVT(23.21)T(11.74)S(-11.74)PS(-26.63)S(-26.63)T(-26.63)FVPNILS(-134.9)K	6	4	0.17462	20565000	0	20565000	0	1.1236	929	259	283	283	665	825;826	1291	3041;3042	1291	3042	56840	1291	3042	56840	1291	3042	56840
Q7Z589	501	Q7Z589	Protein EMSY	EMSY	0.99992	40.9568	0	302.63	289.95	234.92	1;2	T	MVVSSNGAIMTTKLVTTPTGTQATYTRPTVS	X;X;X;X;X;X;X;X;X;X;X;X;X;X;X;GalT_UC1;X;X;X;X;GalT_UC1;X;X;X;X;X;X;X;X;X;X	XXXXXXXXXXXXXPPPPPPPPPPPPPPPPPP	LVT(1)TPTGTQATYTR	LVT(40.96)T(-40.96)PT(-90.95)GT(-135.42)QAT(-190.41)YT(-217.29)R	3	3	-0.12228	213260000	79737000	133520000	0	16.05	920	259	501	501	310;311	380;381;382	596;597;598;600	1343;1344;1345;1346;1347;1348;1351;1352	596	1344	16079	600	1352	33033	601	1353	32126
Q7Z589	506	Q7Z589	Protein EMSY	EMSY	0.996588	26.7551	6.62633e-109	153.39	127.53	113.25	1;2	T	NGAIMTTKLVTTPTGTQATYTRPTVSPSIGR	X;X;X;X;X;X;X;X;X;X;GalT_UC1;X;X;X;X;GalT_UC1;X;X;X;X;X;X;X;X;X;X;X;X;X;X;X	XXXXXXXXPPPPPPPPPPPPPPPPPPPPPPP	LVT(0.986)T(0.014)PT(0.002)GT(0.997)QAT(0.001)YTRPTVSPSIGR	LVT(18.54)T(-18.54)PT(-26.76)GT(26.76)QAT(-29.38)YT(-43.99)RPT(-51.18)VS(-70.21)PS(-64.19)IGR	8	4	-0.16146	135500000	84184000	51317000	0	10.198	922	259	506	506	310;311	380;381;382	597;599	1345;1346;1349;1350	597	1345	26368	599	1350	32149	599	1350	32149
Q7Z589	556	Q7Z589	Protein EMSY	EMSY	0.926186	10.9856	3.47002e-190	201.84	151.55	201.84	1	S	TVVPKSLATLGGKIISSNIVSGTTTKITTIP	X;X;X;X;X;X;X;X;X;X;X;X;X;X;X;GalT_UC1;X;X;X;X;X;X;X;X;X;X;X;X;X;X;X	XXXXXXXXXXXXXPPPPPPPPPPPPPXXXXX	IIS(0.926)S(0.074)NIVSGTTTK	IIS(10.99)S(-10.99)NIVS(-121.83)GT(-159.42)T(-175.73)T(-186.86)K	3	3	0.15849	125330000	125330000	0	0	NaN	373	259	556	556	215	261	408;409	965;966;967;968;969	408	966	17291	408	966	17291	408	966	17291
Q7Z589	1098	Q7Z589	Protein EMSY	EMSY	0.998215	31.0201	1.03178e-36	117.79	100.39	117.79	1	T	SSEKQTASQVEQPIITQGSSVTKITFEGRQP	X;X;X;X;X;X;X;X;X;X;X;X;X;X;X;GalT_UC1;X;X;X;X;X;X;X;X;X;X;X;X;X;X;X	XXXXPPPPPPPPPPPPPPPPPPPXXXXXXXX	QTASQVEQPIIT(0.998)QGS(0.001)SVT(0.001)K	QT(-42.22)AS(-42.22)QVEQPIIT(31.02)QGS(-31.02)S(-40.61)VT(-31.02)K	12	3	0.13551	140130000	140130000	0	0	NaN	924	259	1098	1098	425	516	789	1780;1781;1782	789	1781	22498	789	1781	22498	789	1781	22498
Q7Z589	1120	Q7Z589	Protein EMSY	EMSY	0.941511	12.7894	0.0264219	40.994	15.698	40.994	1	T	KITFEGRQPPTVTKITGGSSVPKLTSPVTSI	X;X;X;X;X;X;X;X;X;X;X;X;X;X;X;GalT_UC1;X;X;X;X;X;X;X;X;X;X;X;X;X;X;X	XXXXXXXXXXXXXXPPPPPPPPPXXXXXXXX	IT(0.942)GGS(0.05)S(0.009)VPK	IT(12.79)GGS(-12.79)S(-20.22)VPK	2	3	0.29166	92279000	92279000	0	0	NaN	919	259	1120	1120	234	287	461	1087	461	1087	7307	461	1087	7307	461	1087	7307
Q7Z6J0	505	Q7Z6J0	E3 ubiquitin-protein ligase SH3RF1	SH3RF1	1	131.369	1.65072e-49	131.37	83.257	131.37	1	T	TSKIGVFPGNYVAPVTRAVTNASQAKVPMST	X;X;X;X;X;X;X;X;X;X;X;X;X;X;X;GalT_UC1;X;X;X;X;X;X;X;X;X;X;X;X;X;X;X	XXXPPPPPPPPPPPPPPXXXXXXXXXXXXXX	IGVFPGNYVAPVT(1)R	IGVFPGNYVAPVT(131.37)R	13	3	-0.23565	131680000	131680000	0	0	NaN	930	261	505	505	211	257	404	953	404	953	49024	404	953	49024	404	953	49024
Q7Z6Z7	3116	Q7Z6Z7	E3 ubiquitin-protein ligase HUWE1	HUWE1	0.816529	9.49531	1.21751e-75	144.73	117.05	144.73	1	S	EARQRQLMHERLFGHSSTSALSAILRSPAFT	X;X;X;X;X;X;X;X;X;X;X;X;X;X;X;GalT_UC1;X;X;X;X;X;X;X;X;X;X;X;X;X;X;X	XXXXXXXXXXXPPPPPPPPPPPPPPPXXXXX	LFGHS(0.817)S(0.092)T(0.092)SALSAILR	LFGHS(9.5)S(-9.5)T(-9.5)S(-42.98)ALS(-69.05)AILR	5	3	-0.20075	8035700	8035700	0	0	NaN	374	262	3116	3116	271	334	536	1220	536	1220	44579	536	1220	44579	536	1220	44579
Q7Z6Z7	3118	Q7Z6Z7	E3 ubiquitin-protein ligase HUWE1	HUWE1	0.769269	10.1494	5.57295e-39	118.87	100.24	118.87	1	T	RQRQLMHERLFGHSSTSALSAILRSPAFTSR	X;X;X;X;X;X;X;X;X;X;X;X;X;X;X;GalT_UC1;X;X;X;X;X;X;X;X;X;X;X;X;X;X;X	XXXXXXXXXPPPPPPPPPPPPPPPXXXXXXX	LFGHS(0.074)S(0.074)T(0.769)S(0.074)ALS(0.008)AILR	LFGHS(-10.15)S(-10.15)T(10.15)S(-10.15)ALS(-19.96)AILR	7	4	0.56338	10464000	10464000	0	0	NaN	931	262	3118	3118	271	334	537	1221;1222	537	1222	44721	537	1222	44721	537	1222	44721
Q7Z739	167	Q7Z739	YTH domain-containing family protein 3	YTHDF3	0.999984	51.061	0.0019862	55.452	39.913	55.452	1	T	SSSYGYPPSSLGRAITDGQAGFGNDTLSKVP	X;X;X;X;X;X;X;X;X;X;X;X;X;X;X;GalT_UC1;X;X;X;X;X;X;X;X;X;X;X;X;X;X;X	XXXXXXXXXXXXXPPPPPPPPPPPPPPPPXX	AIT(1)DGQAGFGNDTLSK	AIT(51.06)DGQAGFGNDT(-51.06)LS(-51.06)K	3	3	0.016412	10354000	10354000	0	0	NaN	932	263	167	167	17	19	31	83;84	31	84	29991	31	84	29991	31	84	29991
Q7Z739	205	Q7Z739	YTH domain-containing family protein 3	YTHDF3	1	84.1028	2.78332e-47	116.52	73.569	116.52	1	T	GMTGLKIGGDLTAAVTKTVGTALSSSGMTSI	X;X;X;X;X;X;X;X;X;X;X;X;X;X;X;GalT_UC1;X;X;X;X;X;X;X;X;X;X;X;X;X;X;X	XXXXXXPPPPPPPPPPPXXXXXXXXXXXXXX	IGGDLTAAVT(1)K	IGGDLT(-84.1)AAVT(84.1)K	10	3	0.14423	1338000000	1338000000	0	0	NaN	933	263	205	205	208	254	399;400	944;945;946;947;948;949	399	944	18056	399	944	18056	400	949	17821
Q86T24	257	Q86T24	Transcriptional regulator Kaiso	ZBTB33	0.999977	48.8747	2.19074e-180	190.34	132.77	190.34	1	T	NITPTQKLPTPVNQATLSQTQGSEKLLVSSA	X;X;X;X;X;X;X;X;X;X;X;X;X;X;X;GalT_UC1;X;X;X;X;X;X;X;X;X;X;X;X;X;X;X	XXXXXXXPPPPPPPPPPPPPPPPPPXXXXXX	LPTPVNQAT(1)LSQTQGSEK	LPT(-48.87)PVNQAT(48.87)LS(-50.01)QT(-95.32)QGS(-118.25)EK	9	3	-0.046712	54262000	54262000	0	0	NaN	934	264	257	257	290	355	563	1282;1283;1284;1285	563	1285	20684	563	1285	20684	563	1285	20684
Q86UE4	492	Q86UE4	Protein LYRIC	MTDH	0.782333	8.86714	0.000299684	72.34	54.137	72.34	1	T	TSKTRPKQEKAFSLKTISTSDPAEVLVKNSQ	X;X;X;X;X;X;X;X;X;X;X;X;X;X;X;GalT_UC1;X;X;X;X;X;X;X;X;X;X;X;X;X;X;X	XXXXXXXXXXXXXXXPPPPPPPPPPPPPXXX	T(0.782)IS(0.102)T(0.102)S(0.015)DPAEVLVK	T(8.87)IS(-8.87)T(-8.87)S(-17.3)DPAEVLVK	1	3	0.24036	13020000	13020000	0	0	NaN	935	265	492	492	572	710	1127	2638;2639;2640	1127	2638	32947	1127	2638	32947	1127	2638	32947
Q86VF7	205	Q86VF7	Nebulin-related-anchoring protein	NRAP	0.925379	10.9939	0.0378753	41.052	10.847	41.052	1	S	QVEYKRGHDERISRFSTVVDTPELLRSKAGA	X;X;X;X;X;X;X;X;X;X;X;X;X;X;X;GalT_UC1;X;X;X;X;X;X;X;X;X;X;X;X;X;X;X	XXXXXXXXXXXXXXPPPPPPPPPPPPXXXXX	FS(0.925)T(0.074)VVDT(0.001)PELLR	FS(10.99)T(-10.99)VVDT(-29.61)PELLR	2	3	-0.28093	13840000	13840000	0	0	NaN	377	266	205	205	141	174	280	693	280	693	24446	280	693	24446	280	693	24446
Q86YP4	589	Q86YP4	Transcriptional repressor p66-alpha	GATAD2A	0.927482	11.39	2.38509e-190	192.65	192.65	192.65	1	S	AGKGSATSNWKKTPLSTGGTLAFVSPSLAVH	X;X;X;X;X;X;X;X;X;X;X;X;X;X;X;GalT_UC1;X;X;X;X;X;X;X;X;X;X;X;X;X;X;X	XXXXXXXXXXXXPPPPPPPPPPPPPPPPPPP	T(0.005)PLS(0.927)T(0.067)GGTLAFVSPSLAVHK	T(-22.54)PLS(11.39)T(-11.39)GGT(-64.59)LAFVS(-160.14)PS(-165.32)LAVHK	4	4	0.1384	7465900	7465900	0	0	NaN	379	267	589	589	593	738	1173	2769;2770	1173	2770	53176	1173	2770	53176	1173	2770	53176
Q8IVL1	1545	Q8IVL1	Neuron navigator 2	NAV2	0.893189	9.68887	0	220.82	205.89	220.82	1	T	AKEWLRSHSAGGLQDTAANSPFSSGSSVTSP	X;X;X;X;X;X;X;X;X;X;X;X;X;X;X;GalT_UC1;X;X;X;X;X;X;X;X;X;X;X;X;X;X;X	XXXXXXPPPPPPPPPPPPPPPPPPPPPPPPP	SHSAGGLQDT(0.893)AANS(0.096)PFS(0.011)SGSSVTSPSGTR	S(-81.12)HS(-55.63)AGGLQDT(9.69)AANS(-9.69)PFS(-19.21)S(-37.76)GS(-58.5)S(-84.84)VT(-103.86)S(-118.24)PS(-136.78)GT(-152.58)R	10	4	0.011657	116340000	116340000	0	0	6.8079	941	270	1545	1545	451	555	858;859	1948;1949;1950;1951;1952;1953	858	1949	26246	858	1949	26246	858	1949	26246
Q8IWB9	175	Q8IWB9	Testis-expressed sequence 2 protein	TEX2	0.993807	25.1932	0	269.04	244.03	269.04	1;2	S	SSSPLSSPSKSPILSSSASTSTLSSAKPFMS	X;X;X;X;X;X;X;X;X;X;X;X;X;X;X;GalT_UC1;X;X;GalT_UC1;X;X;X;X;X;X;X;X;X;X;X;X	XXXXXXXXXXPPPPPPPPPPPPPPPPPXXXX	SPILS(0.003)S(0.994)S(0.003)ASTSTLSSAK	S(-37.38)PILS(-25.19)S(25.19)S(-25.19)AS(-104.71)T(-127.95)S(-160.14)T(-189.03)LS(-213.78)S(-233.96)AK	6	3	0.50055	57443000	45283000	12160000	0	NaN	381	272	175	175	484	591;592	907;909	2077;2082;2083	909	2083	20553	909	2083	20553	909	2083	20553
Q8IWB9	176	Q8IWB9	Testis-expressed sequence 2 protein	TEX2	0.922393	11.1217	1.80589e-204	196.7	177.62	196.7	1	S	SSPLSSPSKSPILSSSASTSTLSSAKPFMSL	X;X;X;X;X;X;X;X;X;X;X;X;X;X;X;GalT_UC1;X;X;X;X;X;X;X;X;X;X;X;X;X;X;X	XXXXXXXXXPPPPPPPPPPPPPPPPPXXXXX	S(0.001)PILS(0.006)S(0.071)S(0.922)ASTSTLSSAK	S(-32.57)PILS(-21.98)S(-11.12)S(11.12)AS(-55.6)T(-66.69)S(-87.79)T(-107.43)LS(-134)S(-149.66)AK	7	3	0.42795	50369000	50369000	0	0	NaN	382	272	176	176	484	591;592	908	2078;2079;2080;2081	908	2079	19964	908	2079	19964	908	2079	19964
Q8IWI9	1557	Q8IWI9	MAX gene-associated protein	MGA	0.972987	15.5665	8.61735e-62	137.4	112.84	137.4	1	S	VMSKVGALQQKIPGVSTPQTLAGTQKFSIRP	X;X;X;X;X;X;X;X;X;X;X;X;X;X;X;GalT_UC1;X;X;X;X;X;X;X;X;X;X;X;X;X;X;X	XXXXXXXXXXXPPPPPPPPPPPPPPPXXXXX	IPGVS(0.973)T(0.027)PQTLAGTQK	IPGVS(15.57)T(-15.57)PQT(-51.44)LAGT(-92.32)QK	5	3	-0.30242	219380000	219380000	0	0	23.479	384	273	1557	1557	219	268	426;427	1018;1019;1020;1021	426	1019	26306	426	1019	26306	426	1019	26306
Q8IWI9	1561	Q8IWI9	MAX gene-associated protein	MGA	0.910746	10.5056	3.97878e-05	74.944	50.386	74.944	1	T	VGALQQKIPGVSTPQTLAGTQKFSIRPSPVM	X;X;X;X;X;X;X;X;X;X;X;X;X;X;X;GalT_UC1;X;X;X;X;X;X;X;X;X;X;X;X;X;X;X	XXXXXXXPPPPPPPPPPPPPPPXXXXXXXXX	IPGVS(0.008)T(0.081)PQT(0.911)LAGTQK	IPGVS(-20.47)T(-10.51)PQT(10.51)LAGT(-46.62)QK	9	3	-0.40361	12679000	12679000	0	0	1.357	943	273	1561	1561	219	268	425	1017	425	1017	22123	425	1017	22123	425	1017	22123
Q8IWI9	1663	Q8IWI9	MAX gene-associated protein	MGA	0.960043	15.0742	1.84611e-223	210.35	196.52	44.807	1;2	T	SVTSTQSTATVNLTKTTGITTPVASVAFPKS	X;X;X;X;X;X;X;X;X;X;X;X;X;X;X;GalT_UC1;GalT_UC1;X;X;X;X;X;X;X;X;X;X;X;X;X;X	XXXXXXXXXXXXXXXPPPPPPPPPPPPPPPX	T(0.96)T(0.96)GIT(0.063)T(0.017)PVASVAFPK	T(15.07)T(15.07)GIT(-15.07)T(-22)PVAS(-39.03)VAFPK	1	4	0.60787	97238000	93037000	4200900	0	8.9373	944	273	1663	1663	624	776;777	1226;1228	2889;2892;2893;2894;2895;2896;2897;2898;2899	1226	2889	34692	1228	2897	45670	1228	2897	45670
Q8IWI9	1664	Q8IWI9	MAX gene-associated protein	MGA	0.960043	15.0742	1.84611e-223	210.35	196.52	44.807	1;2	T	VTSTQSTATVNLTKTTGITTPVASVAFPKSL	X;X;X;X;X;X;X;X;X;X;X;X;X;X;GalT_UC1;GalT_UC1;X;X;X;X;X;X;X;X;X;X;X;X;X;X;X	XXXXXXXXXXXXXXPPPPPPPPPPPPPPPXX	T(0.96)T(0.96)GIT(0.063)T(0.017)PVASVAFPK	T(15.07)T(15.07)GIT(-15.07)T(-22)PVAS(-39.03)VAFPK	2	4	0.60787	97238000	93037000	4200900	0	8.9373	945	273	1664	1664	624	776;777	1226;1228	2889;2892;2893;2894;2895;2896;2897;2898;2899	1226	2889	34692	1228	2897	45670	1228	2897	45670
Q8IWI9	1672	Q8IWI9	MAX gene-associated protein	MGA	0.999446	33.729	9.09392e-24	108.72	93.177	108.72	1	S	TVNLTKTTGITTPVASVAFPKSLVASPSTIT	X;X;X;X;X;X;X;X;X;X;X;X;X;X;X;GalT_UC1;X;X;X;X;X;X;X;X;X;X;X;X;X;X;X	XXXXXXPPPPPPPPPPPPPPPXXXXXXXXXX	TTGITTPVAS(0.999)VAFPK	T(-51.28)T(-42.71)GIT(-41.6)T(-33.73)PVAS(33.73)VAFPK	10	3	-0.39673	24699000	24699000	0	0	2.2701	386	273	1672	1672	624	776;777	1227	2890;2891	1227	2891	44633	1227	2891	44633	1227	2891	44633
Q8IWI9	1872	Q8IWI9	MAX gene-associated protein	MGA	0.997413	26.458	5.62982e-06	77.744	62.478	77.744	1	S	QAGTLTLRISPPEPQSFASKTGSETKITYSS	X;X;X;X;X;X;X;X;X;X;X;X;X;X;X;GalT_UC1;X;X;X;X;X;X;X;X;X;X;X;X;X;X;X	XXXXXXXXPPPPPPPPPPPPXXXXXXXXXXX	IS(0.002)PPEPQS(0.997)FASK	IS(-26.46)PPEPQS(26.46)FAS(-34.77)K	8	3	0.36054	104290000	104290000	0	0	NaN	385	273	1872	1872	229	281	450	1065	450	1065	20262	450	1065	20262	450	1065	20262
Q8IWZ3	1816	Q8IWZ3	Ankyrin repeat and KH domain-containing protein 1	ANKHD1	0.835838	10.0822	1.342e-157	176.69	163.88	176.69	1	T	ASSKNAFPLGAPTLVTSQATTLSTFQPANKL	X;GalT_UC1;X;X;X;X;X;X;X;X;X;X;X;X;X;GalT_UC1;X;X;X;X;X;X;X;X;X;X;X;X;X;X;X	XXXXPPPPPPPPPPPPPPPPPPPPPPPPPPX	NAFPLGAPT(0.082)LVT(0.836)S(0.082)QATTLSTFQPANK	NAFPLGAPT(-10.08)LVT(10.08)S(-10.08)QAT(-39.07)T(-48.3)LS(-48.3)T(-57.31)FQPANK	12	4	0.26106	96483000	96483000	0	0	9.8526	947	274	1816	1816	321	394	615	1373;1374;1375;1376;1377;1378;1379	615	1374	76916	615	1374	76916	615	1374	76916
Q8IWZ3	1817	Q8IWZ3	Ankyrin repeat and KH domain-containing protein 1	ANKHD1	0.804619	8.26669	0.00080626	47.09	27.798	47.09	1	S	SSKNAFPLGAPTLVTSQATTLSTFQPANKLN	GalT_UC1;X;X;X;X;X;X;X;X;X;X;X;X;X;X;GalT_UC1;X;X;X;X;X;X;X;X;X;X;X;X;X;X;X	XXXPPPPPPPPPPPPPPPPPPPPPPPPPPXX	NAFPLGAPT(0.02)LVT(0.12)S(0.805)QAT(0.02)T(0.016)LS(0.016)T(0.002)FQPANK	NAFPLGAPT(-15.98)LVT(-8.27)S(8.27)QAT(-15.98)T(-16.94)LS(-16.94)T(-25.49)FQPANK	13	3	-0.65971	8614000	8614000	0	0	0.87964	387	274	1817	1817	321	394	617	1381	617	1381	78641	617	1381	78641	617	1381	78641
Q8IY33	309	Q8IY33	MICAL-like protein 2	MICALL2	0.875124	12.4839	3.46047e-50	119.65	101.91	119.65	1	T	SPARASVPAAPNPAATSATSVHVRSPARPSE	X;X;X;X;X;X;X;X;X;X;X;X;X;X;X;GalT_UC1;X;X;X;X;X;X;X;X;X;X;X;X;X;X;X	XXXXPPPPPPPPPPPPPPPPPPPPXXXXXXX	AS(0.016)VPAAPNPAAT(0.875)S(0.01)AT(0.049)S(0.049)VHVR	AS(-17.36)VPAAPNPAAT(12.48)S(-19.42)AT(-12.48)S(-12.48)VHVR	12	4	-0.31255	62927000	62927000	0	0	NaN	950	275	309	309	54	72	127	366;367;368;369	127	367	20640	127	367	20640	127	367	20640
Q8IZ21	201	Q8IZ21	Phosphatase and actin regulator 4	PHACTR4	0.929261	11.1874	4.00932e-215	201.3	183.67	201.3	1;2	S	AKDATSSGGTARFIISTSITTAPAATTAATS	X;X;X;X;X;X;X;X;X;X;X;X;X;X;X;GalT_UC1;X;X;X;X;X;X;X;X;X;X;X;X;X;X;X	XXXXXXXXXXXXPPPPPPPPPPPPPPPPPPP	FIIS(0.929)T(0.071)SITTAPAATTAATSLAK	FIIS(11.19)T(-11.19)S(-43.39)IT(-89)T(-108.14)APAAT(-166.27)T(-175.42)AAT(-177.19)S(-181.63)LAK	4	3	0.22223	37143000	22204000	14940000	0	NaN	392	276	201	201	131	162;163	261;262	652;653;654;655	262	655	64162	262	655	64162	262	655	64162
Q8IZ21	202	Q8IZ21	Phosphatase and actin regulator 4	PHACTR4	0.884929	6.54063	3.23014e-12	69.765	63.116	69.765	2	T	KDATSSGGTARFIISTSITTAPAATTAATSL	X;X;X;X;X;X;X;X;X;X;X;X;X;X;X;GalT_UC1;GalT_UC1;X;X;X;X;X;X;X;X;X;X;X;X;X;X	XXXXXXXXXXXPPPPPPPPPPPPPPPPPPPP	FIIS(0.512)T(0.885)S(0.585)IT(0.016)T(0.002)APAATTAATSLAK	FIIS(-0.68)T(6.54)S(0.68)IT(-18.46)T(-30.11)APAAT(-46.16)T(-46.16)AAT(-49.33)S(-49.33)LAK	5	4	-0.092498	14940000	0	14940000	0	NaN	951	276	202	202	131	162;163	261	652;653	261	652	50496	261	652	50496	261	652	50496
Q8IZC4	92	Q8IZC4	Rhotekin-2	RTKN2	1	45.1154	0.029988	45.115	11.319	45.115	1	S	EQIANQTGRCDVKFESKERTACKGKIAISDI	X;X;X;X;X;X;X;X;X;X;X;X;X;X;X;GalT_UC1;X;X;X;X;X;X;X;X;X;X;X;X;X;X;X	XXXXXXXXXPPPPPPPPPPXXXXXXXXXXXX	CDVKFES(1)KER	CDVKFES(45.12)KER	7	3	1.4165	0	0	0	0	NaN	394	277	92	92	73	96	159	423	159	423	70725	159	423	70725	159	423	70725
Q8IZL8	712	Q8IZL8	Proline-, glutamic acid- and leucine-rich protein 1	PELP1	0.996517	28.4176	8.652e-22	91.583	87.032	91.583	1	S	SARPGPPTTANHLGLSVPGLVSVPPRLLPGP	X;X;X;X;X;X;X;X;X;X;X;X;X;X;X;GalT_UC1;X;X;X;X;X;X;X;X;X;X;X;X;X;X;X	XXXPPPPPPPPPPPPPPPPPPPPPPPXXXXX	PGPPT(0.001)T(0.001)ANHLGLS(0.997)VPGLVS(0.001)VPPR	PGPPT(-29.88)T(-29.88)ANHLGLS(28.42)VPGLVS(-28.42)VPPR	13	4	-0.32835	10135000	10135000	0	0	NaN	395	278	712	712	362	440	685	1528;1529;1530;1531;1532	685	1531	57089	685	1531	57089	685	1531	57089
Q8N1I0	1797	Q8N1I0	Dedicator of cytokinesis protein 4	DOCK4	0.99243	21.586	8.98264e-84	150.22	139.84	101.36	1	T	SGKLISPPVPPRPTQTASPARHTTSVSPSPA	X;X;X;X;X;X;X;X;X;X;X;X;X;X;X;GalT_UC1;X;X;X;X;X;X;X;X;X;X;X;X;X;X;X	XXXPPPPPPPPPPPPPPPPPPXXXXXXXXXX	LISPPVPPRPT(0.001)QT(0.992)AS(0.007)PAR	LIS(-67.66)PPVPPRPT(-31.63)QT(21.59)AS(-21.59)PAR	13	3	0.091847	197170000	197170000	0	0	29.293	955	281	1797	1797	276	339	543;544	1244;1245;1246;1247;1248;1249;1250;1251;1252;1253	544	1253	25237	543	1247	25180	543	1247	25180
Q8N3V7	409	Q8N3V7	Synaptopodin	SYNPO	0.964643	17.3758	6.18349e-86	158.47	119.84	158.47	1	T	VRCSTLLIDKVSTPATTTSTFSREATLIPSS	X;X;X;X;X;X;X;X;X;X;X;X;X;X;X;GalT_UC1;X;X;X;X;X;X;X;X;X;X;X;X;X;X;X	XXXXXXXXXXPPPPPPPPPPPPPXXXXXXXX	VS(0.018)T(0.018)PAT(0.965)TTSTFSR	VS(-17.38)T(-17.38)PAT(17.38)T(-42.56)T(-60.84)S(-82.13)T(-99.52)FS(-117.75)R	6	3	-0.11729	14866000	14866000	0	0	NaN	956	283	409	409	696	862	1345	3184;3185	1345	3185	12958	1345	3185	12958	1345	3185	12958
Q8N3X1	797	Q8N3X1	Formin-binding protein 4	FNBP4	0.867356	8.77618	5.9173e-81	153.05	104.44	44.318	1	S	SSSSTKGIKRKATEISTAVVQRSATIGSSPV	X;X;X;X;X;X;X;X;X;X;X;X;X;X;X;GalT_UC1;X;X;X;X;X;X;X;X;X;X;X;X;X;X;X	XXXXXXXXXXPPPPPPPPPPPPXXXXXXXXX	KAT(0.018)EIS(0.867)T(0.115)AVVQR	KAT(-16.91)EIS(8.78)T(-8.78)AVVQR	6	3	0.013545	106810000	106810000	0	0	6.3086	399	284	797	797	57;240	75;295	130;473	372;373;1106	473	1106	8206	130	372	13292	130	372	13292
Q8N465	60	Q8N465	D-2-hydroxyglutarate dehydrogenase, mitochondrial	D2HGDH	0.999703	35.2532	0.0335579	40.352	8.9298	40.352	2	S	VPLTRERYPVRRLPFSTVSKQDLAAFERIVP	X;X;X;X;X;X;X;X;X;X;X;X;X;X;X;GalT_UC1;GalT_UC1;X;X;X;X;X;X;X;X;X;X;X;X;X;X	XXXXXXXXXXXXPPPPPPPPXXXXXXXXXXX	LPFS(1)T(0.996)VS(0.004)K	LPFS(35.25)T(24.21)VS(-24.21)K	4	3	-0.18872	27072000	0	27072000	0	NaN	400	285	60	60	286	351	559	1277	559	1277	22752	559	1277	22752	559	1277	22752
Q8N465	61	Q8N465	D-2-hydroxyglutarate dehydrogenase, mitochondrial	D2HGDH	0.996226	24.2137	0.0335579	40.352	8.9298	40.352	2	T	PLTRERYPVRRLPFSTVSKQDLAAFERIVPG	X;X;X;X;X;X;X;X;X;X;X;X;X;X;GalT_UC1;GalT_UC1;X;X;X;X;X;X;X;X;X;X;X;X;X;X;X	XXXXXXXXXXXPPPPPPPPXXXXXXXXXXXX	LPFS(1)T(0.996)VS(0.004)K	LPFS(35.25)T(24.21)VS(-24.21)K	5	3	-0.18872	27072000	0	27072000	0	NaN	957	285	61	61	286	351	559	1277	559	1277	22752	559	1277	22752	559	1277	22752
Q8NDV7	1687	Q8NDV7	Trinucleotide repeat-containing gene 6A protein	TNRC6A	0.759167	8.5276	1.1851e-19	100.93	78.398	83.226	1;2	S	AWSSIRASNYNVPLSSTAQSTSARNSDSKLT	X;X;X;X;X;X;X;X;X;X;X;X;X;X;X;GalT_UC1;GalT_UC1;X;X;X;X;X;X;X;X;X;X;X;X;X;X	XXXXXXPPPPPPPPPPPPPPPPPPXXXXXXX	AS(0.027)NYNVPLS(0.107)S(0.759)T(0.107)AQS(0.001)TSAR	AS(-14.47)NYNVPLS(-8.53)S(8.53)T(-8.53)AQS(-31.76)T(-39.03)S(-44.34)AR	10	3	0.071911	271150000	161040000	110110000	0	22.356	403	289	1687	1687	45	57;58	100;101;102	299;300;301;302	102	302	18703	101	301	12103	101	301	12103
Q8NDV7	1688	Q8NDV7	Trinucleotide repeat-containing gene 6A protein	TNRC6A	0.969437	14.0205	1.1851e-19	100.93	78.398	100.93	2	T	WSSIRASNYNVPLSSTAQSTSARNSDSKLTW	X;X;X;X;X;X;X;X;X;X;X;X;X;GalT_UC1;GalT_UC1;GalT_UC1;X;X;X;X;X;X;X;X;X;X;X;X;X;X;X	XXXXXPPPPPPPPPPPPPPPPPPXXXXXXXX	ASNYNVPLS(0.29)S(0.737)T(0.969)AQS(0.001)T(0.001)SAR	AS(-44.81)NYNVPLS(-4.33)S(4.33)T(14.02)AQS(-29.76)T(-29.76)S(-38.84)AR	11	4	0.037512	110110000	0	110110000	0	9.0786	960	289	1688	1688	45	57;58	100;101	299;300;301	101	301	12103	101	301	12103	101	301	12103
Q8NDV7	1712	Q8NDV7	Trinucleotide repeat-containing gene 6A protein	TNRC6A	0.907739	9.98255	5.49657e-71	143.46	119.45	143.46	1	S	SDSKLTWSPGSVTNTSLAHELWKVPLPPKNI	X;X;X;X;X;X;X;X;X;X;X;X;X;X;X;GalT_UC1;X;X;X;X;X;X;X;X;X;X;X;X;X;X;X	XXXXPPPPPPPPPPPPPPPPPPPXXXXXXXX	LTWSPGSVT(0.001)NT(0.091)S(0.908)LAHELWK	LT(-64.11)WS(-64.11)PGS(-47.21)VT(-29.15)NT(-9.98)S(9.98)LAHELWK	12	4	-0.056117	17335000	17335000	0	0	NaN	404	289	1712	1712	302	367	578	1312;1313	578	1313	61945	578	1313	61945	578	1313	61945
Q8NDX5	674	Q8NDX5	Polyhomeotic-like protein 3	PHC3	0.921848	10.7172	3.94564e-242	209.66	195.31	209.66	1	T	HVSVPPPPLLLPAATTRSNSTSMHSSIPSIE	X;X;X;X;X;X;X;X;X;X;X;X;X;X;X;GalT_UC1;X;X;X;X;X;X;X;X;X;X;X;X;X;X;X	PPPPPPPPPPPPPPPPPXXXXXXXXXXXXXX	SPSDPSHVSVPPPPLLLPAAT(0.078)T(0.922)R	S(-189.06)PS(-189.06)DPS(-178.6)HVS(-130.18)VPPPPLLLPAAT(-10.72)T(10.72)R	22	4	0.15513	52661000	52661000	0	0	NaN	961	290	674	674	487	596	915	2102;2103;2104	915	2104	59682	915	2104	59682	915	2104	59682
Q8NEY1	534	Q8NEY1	Neuron navigator 1	NAV1	0.999984	49.2487	2.03632e-08	72.421	62.369	72.421	1	T	KPISLGHPGSLKKGKTPPVAVTSPITHTAQS	X;X;X;X;X;X;X;X;X;X;X;X;X;X;X;GalT_UC1;X;X;X;X;X;X;X;X;X;X;X;X;X;X;X	XXXXXXXXXXXXXXXPPPPPPPPPPPPPPPP	T(1)PPVAVTSPITHTAQSALK	T(49.25)PPVAVT(-49.25)S(-55.05)PIT(-64.67)HT(-69.41)AQS(-69.32)ALK	1	4	-0.31315	20294000	20294000	0	0	NaN	962	291	534	534	598	745	1184;1185	2808;2809	1184	2808	29753	1184	2808	29753	1184	2808	29753
Q8NEZ2	172	Q8NEZ2	Vacuolar protein sorting-associated protein 37A	VPS37A	0.908947	10.3985	7.61697e-168	184.99	156.66	184.99	1	S	FLPPYPPQEANRSITSLSVADTVSSSTTSHT	X;X;X;X;X;X;X;X;X;X;X;X;X;X;X;GalT_UC1;X;X;X;X;X;X;X;X;X;X;X;X;X;X;X	XXXXXXXXXXXXPPPPPPPPPPPPPPPPPPP	S(0.008)IT(0.083)S(0.909)LSVADTVSSSTTSHTTAK	S(-20.58)IT(-10.4)S(10.4)LS(-37.35)VADT(-101.58)VS(-130.73)S(-147.81)S(-154.41)T(-160.51)T(-160.51)S(-160.51)HT(-159.43)T(-160.76)AK	4	4	0.1009	11129000	11129000	0	0	0.30981	406	292	172	172	458	563	873	1993;1994;1995	873	1995	26292	873	1995	26292	873	1995	26292
Q8NEZ2	178	Q8NEZ2	Vacuolar protein sorting-associated protein 37A	VPS37A	0.918818	11.3131	1.69985e-146	176.33	145.5	176.33	1	T	PQEANRSITSLSVADTVSSSTTSHTTAKPAA	X;X;X;X;X;X;X;X;X;X;X;X;X;X;X;GalT_UC1;X;X;X;X;X;X;X;X;X;X;X;X;X;X;X	XXXXXXPPPPPPPPPPPPPPPPPPPPPPXXX	S(0.006)ITS(0.001)LS(0.006)VADT(0.919)VS(0.068)S(0.001)STTSHTTAK	S(-21.88)IT(-41.1)S(-31.6)LS(-21.88)VADT(11.31)VS(-11.31)S(-31.6)S(-58.02)T(-67.29)T(-67.29)S(-83.18)HT(-90.5)T(-93.46)AK	10	4	-0.55232	30736000	30736000	0	0	0.85565	964	292	178	178	458	563	870	1980;1981;1982;1983	870	1981	24881	870	1981	24881	870	1981	24881
Q8NFH5	296	Q8NFH5	Nucleoporin NUP53	NUP35	0.947994	12.9077	1.11763e-96	143.89	124.11	143.89		S	PRISTMRPLATAYKASTSDYQVISDRQTPKK	X;X;X;X;X;X;X;X;X;X;X;X;X;X;X;GalT_UC1;X;X;X;X;X;X;X;X;X;X;X;X;X;X;X	XXXXXXXXXXXXXXPPPPPPPPPPPPXXXXX	AS(0.948)T(0.049)S(0.003)DYQVISDR	AS(12.91)T(-12.91)S(-24.36)DYQVIS(-136.36)DR	2	3	-0.3239	27145000	27145000	0	0	6.5604	409	294	296	296	53	70	125	364	125	364	13810	125	364	13810	125	364	13810
Q8NFQ8	288	Q8NFQ8	Torsin-1A-interacting protein 2	TOR1AIP2	0.985414	18.2982	3.43528e-26	103.79	76.142	103.79	1	S	LWQRGRKFLQKHLNASNPTEPATIIFTAARE	X;X;X;X;X;X;X;X;X;X;X;X;X;X;X;GalT_UC1;X;X;X;X;X;X;X;X;X;X;X;X;X;X;X	XXXXXXXXXXXPPPPPPPPPPPPPPPPPPPX	HLNAS(0.985)NPT(0.015)EPATIIFTAAR	HLNAS(18.3)NPT(-18.3)EPAT(-53)IIFT(-86.09)AAR	5	4	-0.3703	4501400	4501400	0	0	NaN	410	295	288	288	192	235	369	867;868	369	868	46977	369	868	46977	369	868	46977
Q8TCJ2	625	Q8TCJ2	Dolichyl-diphosphooligosaccharide--protein glycosyltransferase subunit STT3B	STT3B	0.986438	18.6212	1.95635e-46	123.76	101.23	123.76	1	T	QIAGMANRTTLVDNNTWNNSHIALVGKAMSS	X;X;X;X;X;X;X;X;X;X;X;X;X;X;X;GalT_UC1;X;X;X;X;X;X;X;X;X;X;X;X;X;X;X	XXXXXXXXPPPPPPPPPPPPPPPPPPPXXXX	TTLVDNNT(0.986)WNNS(0.014)HIALVGK	T(-52.21)T(-52.21)LVDNNT(18.62)WNNS(-18.62)HIALVGK	8	3	0.38733	13705000	13705000	0	0	NaN	966	297	625	625	627	781	1234	2909;2910	1234	2910	42949	1234	2910	42949	1234	2910	42949
Q8TCJ2	629	Q8TCJ2	Dolichyl-diphosphooligosaccharide--protein glycosyltransferase subunit STT3B	STT3B	0.954971	13.265	1.2566e-180	187.63	165.16	187.63	1	S	MANRTTLVDNNTWNNSHIALVGKAMSSNETA	X;X;X;X;X;X;X;X;X;X;X;X;X;X;X;GalT_UC1;X;X;X;X;X;X;X;X;X;X;X;X;X;X;X	XXXXPPPPPPPPPPPPPPPPPPPXXXXXXXX	TTLVDNNT(0.045)WNNS(0.955)HIALVGK	T(-110.81)T(-106.9)LVDNNT(-13.27)WNNS(13.27)HIALVGK	12	4	-0.31973	20495000	20495000	0	0	NaN	412	297	629	629	627	781	1233	2905;2906;2907;2908	1233	2908	43029	1233	2908	43029	1233	2908	43029
Q8TCU4	1502	Q8TCU4	Alstrom syndrome protein 1	ALMS1	0.999852	37.0848	7.15412e-06	56.488	41.089	56.488	1;2	S	QAFPEGHLPEESLKVSVAPGPVGQTTGAPTI	X;X;X;X;X;X;X;X;X;X;X;X;X;X;X;GalT_UC1;X;X;X;X;X;X;X;X;GalT_UC1;X;X;X;X;X;X	XXXXXXXXXXXXXXPPPPPPPPPPPPPPPPP	VS(1)VAPGPVGQT(0.491)T(0.491)GAPT(0.013)IT(0.003)S(0.001)PSYSQHR	VS(37.08)VAPGPVGQT(0)T(0)GAPT(-15.64)IT(-21.74)S(-27.4)PS(-32.64)YS(-35.13)QHR	2	4	1.419	58244000	33656000	24588000	0	NaN	414	298	1502	1502	700	867;868	1352;1353	3207;3208	1352	3207	26898	1352	3207	26898	1353	3208	34097
Q8TCU4	1512	Q8TCU4	Alstrom syndrome protein 1	ALMS1	0.902488	9.66528	4.79233e-119	156.73	137.66	156.73	1	T	ESLKVSVAPGPVGQTTGAPTITSPSYSQHRA	X;X;X;X;X;X;X;X;X;X;X;X;X;X;X;GalT_UC1;X;X;X;X;X;X;X;X;X;X;X;X;X;X;X	XXXXPPPPPPPPPPPPPPPPPPPPPPPPPPX	VSVAPGPVGQT(0.097)T(0.902)GAPTITSPSYSQHR	VS(-49.4)VAPGPVGQT(-9.67)T(9.67)GAPT(-46.12)IT(-62.95)S(-70.99)PS(-78.77)YS(-98.48)QHR	12	4	0.52845	102720000	102720000	0	0	NaN	969	298	1512	1512	700	867;868	1354	3209;3210;3211;3212	1354	3210	34154	1354	3210	34154	1354	3210	34154
Q8TCU4	1567	Q8TCU4	Alstrom syndrome protein 1	ALMS1	0.788558	9.27625	7.2642e-45	110.77	101.95	110.77	1	S	APGPADQTTGIPTITSTSYSFGEKPIVNYKQ	X;X;X;X;X;X;X;X;X;X;X;X;X;X;X;GalT_UC1;X;X;X;X;X;X;X;X;X;X;X;X;X;X;X	PPPPPPPPPPPPPPPPPPPPPPPPPPPPPPX	VSSAPGPADQTTGIPT(0.012)IT(0.093)S(0.789)T(0.093)S(0.012)YS(0.002)FGEKPIVNYK	VS(-78.79)S(-78.79)APGPADQT(-48.09)T(-39.23)GIPT(-18.28)IT(-9.28)S(9.28)T(-9.28)S(-18.28)YS(-26.99)FGEKPIVNYK	19	4	-0.43901	25003000	25003000	0	0	NaN	413	298	1567	1567	694	860	1343	3176;3177	1343	3177	62768	1343	3177	62768	1343	3177	62768
Q8TCU4	1701	Q8TCU4	Alstrom syndrome protein 1	ALMS1	0.819699	9.74538	3.13169e-62	142.07	121.17	142.07	1	T	EALKVPPVPGPDAQKTETPSVSSSLYSYREK	X;X;X;X;X;X;X;X;X;X;X;X;X;X;X;GalT_UC1;X;X;X;X;X;X;X;X;X;X;X;X;X;X;X	XXXXXXXXXXXXXXXPPPPPPPPPPPPPPXX	T(0.82)ET(0.087)PS(0.006)VS(0.087)SSLYSYR	T(9.75)ET(-9.75)PS(-21.05)VS(-9.75)S(-46.29)S(-56.26)LYS(-85.66)YR	1	3	-0.1641	8833300	8833300	0	0	NaN	967	298	1701	1701	561	697	1109	2580;2581;2582;2583	1109	2581	29374	1109	2581	29374	1109	2581	29374
Q8TEQ6	616	Q8TEQ6	Gem-associated protein 5	GEMIN5	0.932564	11.4102	2.36992e-181	194.3	176.19	194.3	1	T	ASGSNNAVIYVHNLKTVIESSPESPVTITEP	X;X;X;X;X;X;X;X;X;X;X;X;X;X;X;GalT_UC1;X;X;X;X;X;X;X;X;X;X;X;X;X;X;X	XXXXXXXXXXXXXXXPPPPPPPPPPPPPPPP	T(0.933)VIES(0.067)SPESPVTITEPYR	T(11.41)VIES(-11.41)S(-44.08)PES(-93.09)PVT(-126.97)IT(-156.86)EPYR	1	3	0.16659	57789000	57789000	0	0	NaN	971	300	616	616	639	795	1253	2958;2959;2960;2961	1253	2961	45042	1253	2961	45042	1253	2961	45042
Q8WUH6	73	Q8WUH6	Transmembrane protein 263	TMEM263	0.904815	10.2301	0.000450407	68.034	68.034	68.034	1	T	AWIGGKSLEVTKTAVTTVPSMGIGLVKGGVS	X;X;X;X;X;X;X;X;X;X;X;X;X;X;X;GalT_UC1;X;X;X;X;X;X;X;X;X;X;X;X;X;X;X	XXXXXXXXXXXXPPPPPPPPPPPPPPPXXXX	T(0.086)AVT(0.905)T(0.009)VPSMGIGLVK	T(-10.23)AVT(10.23)T(-19.92)VPS(-37.49)MGIGLVK	4	3	-0.025282	5263100	5263100	0	0	NaN	972	302	73	73	551	684	1090	2527;2528	1090	2527	49329	1090	2527	49329	1090	2527	49329
Q8WWI1	1576	Q8WWI1	LIM domain only protein 7	LMO7	0.853626	10.6906	1.94587e-30	114.93	91.142	114.93	1	T	NPSSSVPPPSAGSVKTSTTGVATTQSPTPRS	X;X;X;X;X;X;X;X;X;X;X;X;X;X;X;GalT_UC1;X;X;X;X;X;X;X;X;X;X;X;X;X;X;X	XXXXXXXXXXXXXXXPPPPPPPPPPPPPPPX	T(0.854)S(0.073)T(0.073)T(0.001)GVATTQSPTPR	T(10.69)S(-10.69)T(-10.69)T(-30.57)GVAT(-80.5)T(-84.91)QS(-105.06)PT(-108.68)PR	1	3	-1.8023	27170000	27170000	0	0	NaN	973	303	1576	1576	621	773	1222	2881;2882	1222	2882	7525	1222	2882	7525	1222	2882	7525
Q8WWM7	500	Q8WWM7	Ataxin-2-like protein	ATXN2L	1	71.2372	3.82304e-08	99.442	54.074	99.442	1	S	SDPGVGSISPASPKISLAPTDVKELSTKEPG	X;X;X;X;X;X;X;X;X;X;X;X;X;X;X;GalT_UC1;X;X;X;X;X;X;X;X;X;X;X;X;X;X;X	XXXXXXXXXXXXXXPPPPPPPPPXXXXXXXX	IS(1)LAPTDVK	IS(71.24)LAPT(-71.24)DVK	2	3	-0.15633	19097000	19097000	0	0	NaN	418	304	500	500	227	279	446	1060;1061	446	1060	16612	446	1060	16612	446	1060	16612
Q92540	627	Q92540	Protein SMG7	SMG7	0.986441	18.6185	0.00618832	74.944	38.641	50.04	1	S	AVQVKSQTELRKTPVSEARKTPVTQTPTQAS	X;X;X;X;X;X;X;X;X;X;X;X;X;X;X;GalT_UC1;X;X;X;X;X;X;X;X;X;X;X;X;X;X;X	XXXXXXXXXXXPPPPPPPPXXXXXXXXXXXX	KT(0.014)PVS(0.986)EAR	KT(-18.62)PVS(18.62)EAR	5	3	0.16023	14068000	14068000	0	0	NaN	421	307	627	627	257	319	516;517;518	1183;1184;1185;1186	517	1185	3483	516	1183	2915	518	1186	3670
Q92576	1758	Q92576	PHD finger protein 3	PHF3	0.997451	26.7174	2.26005e-19	84.327	67.662	84.327	1	S	ILMQNIETVHPFRRGSAVATSHFEVGNTCPS	X;X;X;X;X;X;X;X;X;X;X;X;X;X;X;GalT_UC1;X;X;X;X;X;X;X;X;X;X;X;X;X;X;X	XXXXXXXXXXXXXXPPPPPPPPPPPPPPPPP	GS(0.997)AVAT(0.002)SHFEVGNTCPSEFPSK	GS(26.72)AVAT(-26.72)S(-35.64)HFEVGNT(-52.58)CPS(-38.59)EFPS(-50.06)K	2	4	-0.06906	13573000	13573000	0	0	NaN	422	308	1758	1758	170	209	327	780;781	327	780	29669	327	780	29669	327	780	29669
Q92585	335	Q92585	Mastermind-like protein 1	MAML1	0.876912	8.64222	1.23047e-280	207.47	178.54	207.47	1	S	GSAGQTFLGPSSAPVSTDSPSLGGSQTLFHT	X;X;X;X;X;X;X;X;X;X;X;X;X;X;X;GalT_UC1;X;X;X;X;X;X;X;X;X;X;X;X;X;X;X	PPPPPPPPPPPPPPPPPPPPPPPPPPPPPPP	AGSAGQTFLGPSS(0.002)APVS(0.877)T(0.12)DSPSLGGSQTLFHTSGQPR	AGS(-114.24)AGQT(-87.17)FLGPS(-33.73)S(-25.51)APVS(8.64)T(-8.64)DS(-33.73)PS(-53.37)LGGS(-75.02)QT(-95.64)LFHT(-124.44)S(-133.41)GQPR	17	4	-0.5095	22885000	22885000	0	0	NaN	423	309	335	335	12	14	24	64;65	24	65	59100	24	65	59100	24	65	59100
Q92615	589	Q92615	La-related protein 4B	LARP4B	0.977163	16.7788	6.42255e-11	89.46	73.033	89.46	1	S	NTLPVVVSREPSVPASCAVSATYERSPSPAH	X;X;X;X;X;X;X;X;X;X;X;X;X;X;X;GalT_UC1;X;X;X;X;X;X;X;X;X;X;X;X;X;X;X	XXXXXXXXXPPPPPPPPPPPPPPPPXXXXXX	EPS(0.002)VPAS(0.977)CAVS(0.021)ATYER	EPS(-26.3)VPAS(16.78)CAVS(-16.78)AT(-45.02)YER	7	3	0.81951	12816000	12816000	0	0	NaN	424	310	589	589	111	139	225	551	225	551	23925	225	551	23925	225	551	23925
Q92793	141	Q92793	CREB-binding protein	CREBBP	0.850601	10.8121	2.10713e-108	153.95	136.73	153.95	1	S	GDSSAPSLPKQAASTSGPTPAASQALNPQAQ	X;X;X;X;X;X;X;X;X;X;X;X;X;X;X;GalT_UC1;X;X;X;X;X;X;X;X;X;X;X;X;X;X;X	XXXXXXXXXXPPPPPPPPPPPPPPPPPPPPP	QAAS(0.006)T(0.071)S(0.851)GPT(0.071)PAAS(0.002)QALNPQAQK	QAAS(-21.36)T(-10.81)S(10.81)GPT(-10.81)PAAS(-26.12)QALNPQAQK	6	3	-0.2143	8130900	8130900	0	0	NaN	426	313	141	141	398	485	749	1694;1695	749	1695	15243	749	1695	15243	749	1695	15243
Q92841	55	Q92841	Probable ATP-dependent RNA helicase DDX17	DDX17	1	63.592	0	317.99	303.05	317.99	1	T	PAAAPTAEAPPPSVVTRPEPQALPSPAIRAP	X;X;X;X;X;X;X;X;X;X;X;X;X;X;X;GalT_UC1;X;X;X;X;X;X;X;X;X;X;X;X;X;X;X	PPPPPPPPPPPPPPPPPPPPPPPPPPPPPXX	ESAAPAAAPTAEAPPPSVVT(1)RPEPQALPSPAIR	ES(-234.79)AAPAAAPT(-173.36)AEAPPPS(-63.59)VVT(63.59)RPEPQALPS(-137.34)PAIR	20	4	0.04626	187970000	187970000	0	0	NaN	981	314	55	55	115	143	231	560;561	231	561	52490	231	561	52490	231	561	52490
Q92917	12	Q92917	G patch domain and KOW motifs-containing protein	GPKOW	0.999991	50.7985	2.03775e-20	94.007	85.179	94.007	1	T	____MADSKEGVLPLTAASTAPISFGFTRTS	X;X;X;X;X;X;X;X;X;X;X;X;X;X;X;GalT_UC1;X;X;X;X;X;X;X;X;X;X;X;X;X;X;X	XXXXXXXXXPPPPPPPPPPPPPPPPPPPPXX	EGVLPLT(1)AASTAPISFGFTR	EGVLPLT(50.8)AAS(-50.8)T(-63.52)APIS(-81.29)FGFT(-89.59)R	7	3	0.22289	16838000	16838000	0	0	NaN	982	315	12	12	105	132	212	518;519	212	519	80304	212	519	80304	212	519	80304
Q93052	11	Q93052	Lipoma-preferred partner	LPP	0.991941	20.9019	1.6486e-17	108.47	96.324	108.47	1	S	_____MSHPSWLPPKSTGEPLGHVPARMETT	X;X;X;X;X;X;X;X;X;X;X;X;X;X;X;GalT_UC1;X;X;X;X;X;X;X;X;X;X;X;X;X;X;X	XXXXXXXXXXXXXXXPPPPPPPPPPPPXXXX	S(0.992)T(0.008)GEPLGHVPAR	S(20.9)T(-20.9)GEPLGHVPAR	1	2	-0.12389	52532000	52532000	0	0	0.16283	431	317	11	11	521	643	988	2265	988	2265	7425	988	2265	7425	988	2265	7425
Q96AE7	186	Q96AE7	Tetratricopeptide repeat protein 17	TTC17	1	62.8909	0.00102103	62.891	40.358	62.891	1	S	HAFQHLRGVQERVNLSAPLLPKEDPIFTYLS	X;X;X;X;X;X;X;X;X;X;X;X;X;X;X;GalT_UC1;X;X;X;X;X;X;X;X;X;X;X;X;X;X;X	XXXXXXXXXXXXPPPPPPPPPPXXXXXXXXX	VNLS(1)APLLPK	VNLS(62.89)APLLPK	4	3	0.15286	3384100	3384100	0	0	NaN	432	318	186	186	675	841	1323	3136	1323	3136	37200	1323	3136	37200	1323	3136	37200
Q96BD5	125	Q96BD5	PHD finger protein 21A	PHF21A	0.994987	23.3385	5.06518e-30	119.68	103.46	119.68	1	T	AAASPNLTASQKTVTTASMITTKTLPLVLKA	X;X;X;X;X;X;X;X;X;X;X;X;X;X;X;GalT_UC1;X;X;X;X;X;X;X;X;X;X;X;X;X;X;X	XXXXXXXXXXXXPPPPPPPPPPPXXXXXXXX	TVT(0.005)T(0.995)ASMITTK	T(-34.33)VT(-23.34)T(23.34)AS(-44.84)MIT(-64.37)T(-73.33)K	4	3	-0.077483	7934800	7934800	0	0	NaN	988	320	125	125	643	801	1260	2971;2972	1260	2971	12276	1260	2971	12276	1260	2971	12276
Q96BD5	270	Q96BD5	PHD finger protein 21A	PHF21A	0.974192	16.685	2.83057e-11	82.707	77.253	82.707	1;2	T	AAPQLIQRPVMLTKFTPTTLPTSQNSIHPVR	X;X;X;X;X;X;X;X;X;X;X;X;X;X;X;GalT_UC1;X;GalT_UC1;X;X;X;X;X;X;X;X;X;X;X;X;X	XXXXXXXXXXXXXXPPPPPPPPPPPPPPPPP	FT(0.974)PT(0.021)T(0.005)LPTSQNSIHPVR	FT(16.68)PT(-16.68)T(-22.98)LPT(-59.38)S(-64.47)QNS(-75.93)IHPVR	2	3	-0.27371	95840000	78529000	17312000	0	6.4103	986	320	270	270	143	177;178	285;287	702;703;710;711	287	710	27030	287	710	27030	287	710	27030
Q96BD5	272	Q96BD5	PHD finger protein 21A	PHF21A	0.853201	6.98205	4.78933e-10	75.463	56.331	75.463	2	T	PQLIQRPVMLTKFTPTTLPTSQNSIHPVRVV	X;X;X;X;X;X;X;X;X;X;X;X;X;GalT_UC1;X;GalT_UC1;X;X;X;X;X;X;X;X;X;X;X;X;X;X;X	XXXXXXXXXXXXPPPPPPPPPPPPPPPPPXX	FT(0.879)PT(0.853)T(0.268)LPTSQNSIHPVR	FT(7.82)PT(6.98)T(-6.98)LPT(-40.96)S(-55.09)QNS(-70.56)IHPVR	4	5	-0.20499	17312000	0	17312000	0	1.1579	987	320	272	272	143	177;178	285	702;703	285	702	19322	285	702	19322	285	702	19322
Q96BD5	277	Q96BD5	PHD finger protein 21A	PHF21A	0.922597	10.7632	3.80465e-136	170.95	158.39	170.95	1	S	RPVMLTKFTPTTLPTSQNSIHPVRVVNGQTA	X;X;X;X;X;X;X;X;X;X;X;X;X;X;X;GalT_UC1;X;X;X;X;X;X;X;X;X;X;X;X;X;X;X	XXXXXXXPPPPPPPPPPPPPPPPPXXXXXXX	FTPTTLPT(0.077)S(0.923)QNSIHPVR	FT(-60.44)PT(-60.44)T(-51.07)LPT(-10.76)S(10.76)QNS(-54.76)IHPVR	9	4	-0.20851	150790000	150790000	0	0	10.085	433	320	277	277	143	177;178	286	704;705;706;707;708;709	286	707	27069	286	707	27069	286	707	27069
Q96CB8	324	Q96CB8	Integrator complex subunit 12	INTS12	0.783074	8.8823	4.75679e-51	94.856	73.257	94.856		S	KLSSTTQNNTGKPATSSANQKPVGLTGLATS	X;X;X;X;X;X;X;X;X;X;X;X;X;X;X;GalT_UC1;X;X;X;X;X;X;X;X;X;X;X;X;X;X;X	XPPPPPPPPPPPPPPPPPPPPPPPPPPPPPP	LSSTTQNNT(0.014)GKPAT(0.101)S(0.783)S(0.101)ANQKPVGLTGLATSSK	LS(-51.24)S(-44)T(-44)T(-36.38)QNNT(-17.46)GKPAT(-8.88)S(8.88)S(-8.88)ANQKPVGLT(-41.66)GLAT(-60.45)S(-60.45)S(-60.45)K	15	4	1.0205	12225000	12225000	0	0	NaN	434	321	324	324	299	364	574	1305	574	1305	14968	574	1305	14968	574	1305	14968
Q96D71	258	Q96D71	RalBP1-associated Eps domain-containing protein 1	REPS1	0.999847	40.5232	9.4121e-14	78.136	48.448	78.136		T	LTMHPASVQDQTTVRTVASATTAIEIRRQSS	X;X;X;X;X;X;X;X;X;X;X;X;X;X;X;GalT_UC1;X;X;X;X;X;X;X;X;X;X;X;X;X;X;X	XXXXXXXXXXXXXXXPPPPPPPPPPPPXXXX	T(1)VASATTAIEIR	T(40.52)VAS(-40.52)AT(-42.6)T(-50.46)AIEIR	1	3	0.29641	2941800	2941800	0	0	NaN	989	322	258	258	634	789	1245	2929	1245	2929	19917	1245	2929	19917	1245	2929	19917
Q96HC4	110	Q96HC4	PDZ and LIM domain protein 5	PDLIM5	0.997594	26.2193	8.55389e-76	145.09	132.59	145.09	1	T	VQKGEPKEVVKPVPITSPAVSKVTSTNNMAY	X;X;X;X;X;X;X;X;X;X;X;X;X;X;X;GalT_UC1;X;X;X;X;X;X;X;X;X;X;X;X;X;X;X	XXXXXXXPPPPPPPPPPPPPPPXXXXXXXXX	EVVKPVPIT(0.998)S(0.002)PAVSK	EVVKPVPIT(26.22)S(-26.22)PAVS(-46.18)K	9	4	0.21618	91748000	91748000	0	0	1.1674	990	323	110	110	124	152	246	604;605;606;607	246	605	22778	246	605	22778	246	605	22778
Q96HC4	115	Q96HC4	PDZ and LIM domain protein 5	PDLIM5	1	77.993	3.05154e-128	172.11	150.89	172.11	1	S	PKEVVKPVPITSPAVSKVTSTNNMAYNKAPR	X;X;X;X;X;X;X;X;X;X;X;X;X;X;X;GalT_UC1;X;X;X;X;X;X;X;X;X;X;X;X;X;X;X	XXPPPPPPPPPPPPPPPXXXXXXXXXXXXXX	EVVKPVPITSPAVS(1)K	EVVKPVPIT(-97.13)S(-77.99)PAVS(77.99)K	14	4	-0.12844	98461000	98461000	0	0	1.2528	437	323	115	115	124	152	244;245;247	600;601;602;603;608	244	601	21542	244	601	21542	244	601	21542
Q96HC4	309	Q96HC4	PDZ and LIM domain protein 5	PDLIM5	0.994181	26.8774	1.48159e-05	55.383	46.562	55.383	1	S	HLKESEADNTKKANNSQEPSPQLASSVASTR	X;X;X;X;X;X;X;X;X;X;X;X;X;X;X;GalT_UC1;X;X;X;X;X;X;X;X;X;X;X;X;X;X;X	XXXXXXXXXXXXPPPPPPPPPPPPPPPPPPP	ANNS(0.994)QEPS(0.002)PQLASSVAS(0.002)T(0.002)R	ANNS(26.88)QEPS(-26.88)PQLAS(-35.8)S(-35.8)VAS(-27.86)T(-27.86)R	4	3	0.15162	8590200	8590200	0	0	0.44241	435	323	309	309	23;239	25;294	38	103	38	103	19397	38	103	19397	38	103	19397
Q96HC4	319	Q96HC4	PDZ and LIM domain protein 5	PDLIM5	0.858477	8.89007	3.89634e-26	105.14	90.576	105.14	1	S	KKANNSQEPSPQLASSVASTRSMPESLDSPT	X;X;X;X;X;X;X;X;X;X;X;X;X;X;X;GalT_UC1;X;X;X;X;X;X;X;X;X;X;X;X;X;X;X	XPPPPPPPPPPPPPPPPPPPPXXXXXXXXXX	ANNSQEPSPQLAS(0.111)S(0.858)VAS(0.015)T(0.015)R	ANNS(-48.8)QEPS(-41.46)PQLAS(-8.89)S(8.89)VAS(-17.49)T(-17.49)R	14	3	-0.0023238	169020000	169020000	0	0	8.7048	436	323	319	319	23;239	25;294	37;472	98;99;100;101;102;1104;1105	37	99	17455	37	99	17455	37	99	17455
Q96JF6	774	Q96JF6	Zinc finger protein 594	ZNF594	0.868731	8.3599	0.0344444	41.448	8.3599	41.448	1	S	KVYWCNQCSRTFQGSSDLIRHQVTHTREKPY	X;X;X;X;X;X;X;X;X;X;X;X;X;X;X;GalT_UC1;X;X;X;X;X;X;X;X;X;X;X;X;X;X;X	XXXXXXXXXXPPPPPPPPPPXXXXXXXXXXX	T(0.005)FQGS(0.127)S(0.869)DLIR	T(-22.82)FQGS(-8.36)S(8.36)DLIR	6	3	0.10551	21107000	21107000	0	0	NaN	438	324	774	774	564	700	1112	2586	1112	2586	10670	1112	2586	10670	1112	2586	10670
Q96JN0	37	Q96JN0	Ligand-dependent corepressor	LCOR	0.986867	20.1914	9.1886e-08	55.206	50.029	55.206	1	S	PSQPNSTKNQSLPKASPVTTSPTAATTQNPV	X;X;X;X;X;X;X;X;X;X;X;X;X;X;X;GalT_UC1;X;X;X;X;X;X;X;X;X;X;X;X;X;X;X	XXXXXXXXXXXXXXPPPPPPPPPPPPPPPPP	AS(0.987)PVT(0.009)T(0.003)S(0.001)PTAATTQNPVLSK	AS(20.19)PVT(-20.19)T(-25.73)S(-30.98)PT(-36.17)AAT(-48.23)T(-51.14)QNPVLS(-53.97)K	2	3	-0.03237	29638000	29638000	0	0	NaN	439	325	37	37	48	63	116;117	350;351	117	351	27627	117	351	27627	117	351	27627
Q96KR1	102	Q96KR1	Zinc finger RNA-binding protein	ZFR	0.999988	49.4626	2.27158e-39	92.121	88.402	92.121	1	T	VAVARPAPVAVAAAATAAAYGGYPTAHTATD	X;X;X;X;X;X;X;X;X;X;X;X;X;X;X;GalT_UC1;X;X;X;X;X;X;X;X;X;X;X;X;X;X;X	XXXXXPPPPPPPPPPPPPPPPPPPPPPPPPP	PAPVAVAAAAT(1)AAAYGGYPTAHTATDYGYTQR	PAPVAVAAAAT(49.46)AAAYGGYPT(-49.46)AHT(-61.52)AT(-71.36)DYGYT(-78.32)QR	11	5	0.13922	20139000	20139000	0	0	NaN	995	326	102	102	353	431	675	1503;1504	675	1503	59778	675	1503	59778	675	1503	59778
Q96KR1	114	Q96KR1	Zinc finger RNA-binding protein	ZFR	0.990196	20.4569	0	261.17	251.37	261.17	1	T	AAATAAAYGGYPTAHTATDYGYTQRQQEAPP	X;X;X;X;X;X;X;X;X;X;X;X;X;X;X;GalT_UC1;X;X;X;X;X;X;X;X;X;X;X;X;X;X;X	PPPPPPPPPPPPPPPPPPPPPPPPPXXXXXX	PAPVAVAAAATAAAYGGYPT(0.001)AHT(0.99)AT(0.009)DYGYTQR	PAPVAVAAAAT(-145.66)AAAYGGYPT(-30.46)AHT(20.46)AT(-20.46)DYGYT(-103.87)QR	23	4	0.094857	72251000	72251000	0	0	NaN	996	326	114	114	353	431	674	1501;1502	674	1502	59663	674	1502	59663	674	1502	59663
Q96KR1	135	Q96KR1	Zinc finger RNA-binding protein	ZFR	1	146.691	0	272.95	252.71	245.96	1;2	T	YTQRQQEAPPPPPPATTQNYQDSYSYVRSTA	X;X;X;X;X;X;X;X;X;X;X;X;X;X;X;GalT_UC1;GalT_UC1;X;X;X;X;X;X;X;X;X;X;X;X;X;X	XXXXPPPPPPPPPPPPPPPPPPPPPPPPXXX	QQEAPPPPPPAT(1)T(1)QNYQDSYSYVR	QQEAPPPPPPAT(146.69)T(146.69)QNYQDS(-146.69)YS(-191.74)YVR	12	4	-0.045358	1973800000	673580000	1300200000	0	NaN	998	326	135	135	420	508;509	776;777;778;779;781	1736;1737;1738;1739;1740;1741;1742;1743;1744;1745;1746;1747;1748;1749;1750;1751;1752;1753;1754;1755;1756;1757;1758;1759;1760;1761;1762;1765;1766	777	1741	28028	781	1766	38206	781	1766	38206
Q96KR1	136	Q96KR1	Zinc finger RNA-binding protein	ZFR	1	146.691	0	272.95	252.71	245.96	1;2	T	TQRQQEAPPPPPPATTQNYQDSYSYVRSTAP	X;X;X;X;X;X;X;X;X;X;X;X;X;X;GalT_UC1;GalT_UC1;X;X;X;X;X;X;X;X;X;X;X;X;X;X;X	XXXPPPPPPPPPPPPPPPPPPPPPPPPXXXX	QQEAPPPPPPAT(1)T(1)QNYQDSYSYVR	QQEAPPPPPPAT(146.69)T(146.69)QNYQDS(-146.69)YS(-191.74)YVR	13	4	-0.045358	1516200000	215980000	1300200000	0	NaN	999	326	136	136	420	508;509	776;777;780;781	1736;1737;1738;1739;1740;1741;1742;1743;1744;1745;1746;1747;1748;1749;1763;1764;1765;1766	777	1741	28028	781	1766	38206	781	1766	38206
Q96KR1	180	Q96KR1	Zinc finger RNA-binding protein	ZFR	0.940015	12.7029	4.32592e-29	79.177	70.99	79.177	1	S	TATAAAVAAAAQPQPSVAETYYQTAPKAGYS	X;X;X;X;X;X;X;X;X;X;X;X;X;X;X;GalT_UC1;X;X;X;X;X;X;X;X;X;X;X;X;X;X;GalT_UC1	PPPPPPPPPPPPPPPPPPPPPPPPPPPXXXX	QYYQQPT(0.003)AT(0.002)AAAVAAAAQPQPS(0.94)VAET(0.05)YYQT(0.004)APK	QYYQQPT(-24.47)AT(-25.77)AAAVAAAAQPQPS(12.7)VAET(-12.7)YYQT(-24.06)APK	22	3	0.58894	110990000	110990000	0	0	11.439	442	326	180	180	429	521	794;795	1790;1791;1792	794	1790	58403	794	1790	58403	794	1790	58403
Q96KR1	195	Q96KR1	Zinc finger RNA-binding protein	ZFR	1	90.1164	0	270.2	231.8	270.2	1	S	SVAETYYQTAPKAGYSQGATQYTQAQQTRQV	GalT_UC1;X;X;X;X;X;X;X;X;X;X;X;X;X;X;GalT_UC1;X;X;X;X;X;X;X;X;X;X;X;X;X;X;X	XXXXXXXXXXXXPPPPPPPPPPPPPPPPPXX	AGYS(1)QGATQYTQAQQTR	AGYS(90.12)QGAT(-90.12)QYT(-189.02)QAQQT(-222.09)R	4	3	0.33184	535780000	535780000	0	0	NaN	440	326	195	195	15	17	28	74;75;76;77;78;79	28	75	9259	28	75	9259	28	75	9259
Q96KR1	202	Q96KR1	Zinc finger RNA-binding protein	ZFR	0.902373	12.6688	1.31901e-116	162.36	137.52	162.36	1	T	QTAPKAGYSQGATQYTQAQQTRQVTAIKPAT	X;X;X;X;X;X;X;X;X;X;X;X;X;X;X;GalT_UC1;X;X;X;X;X;X;X;X;X;X;X;X;X;X;X	XXXXXPPPPPPPPPPPPPPPPPXXXXXXXXX	AGYS(0.049)QGAT(0.049)QYT(0.902)QAQQTR	AGYS(-12.67)QGAT(-12.67)QYT(12.67)QAQQT(-50.24)R	11	3	0.33684	1523000000	1523000000	0	0	NaN	991	326	202	202	15	17	27	69;70;71;72;73	27	70	8536	27	70	8536	27	70	8536
Q96KR1	300	Q96KR1	Zinc finger RNA-binding protein	ZFR	0.998639	32.0642	1.50636e-50	120.29	107.73	120.29	1	T	QQQKQAAAAAAAAAATAAWTGTTFTKKAPFQ	X;X;X;X;X;X;X;X;X;X;X;X;X;X;X;GalT_UC1;X;X;X;X;X;X;X;X;X;X;X;X;X;X;X	XXXXPPPPPPPPPPPPPPPPPPPPPPXXXXX	QAAAAAAAAAAT(0.999)AAWT(0.001)GT(0.001)TFTK	QAAAAAAAAAAT(32.06)AAWT(-32.06)GT(-32.06)T(-39.92)FT(-47.47)K	12	3	0.30179	81692000	81692000	0	0	NaN	997	326	300	300	397	484	748	1692;1693	748	1693	48564	748	1693	48564	748	1693	48564
Q96KR1	423	Q96KR1	Zinc finger RNA-binding protein	ZFR	0.923051	10.7902	0	241.08	226.97	241.08	1	T	KVVKLHTKLGKPIPSTEPNVVSQATSSTAVS	X;X;X;X;X;X;X;X;X;X;X;X;X;X;X;GalT_UC1;X;X;X;X;X;X;X;X;X;X;X;X;X;X;X	XXXXXXXXPPPPPPPPPPPPPPPPPPPPPPP	LGKPIPS(0.077)T(0.923)EPNVVSQATSSTAVSASK	LGKPIPS(-10.79)T(10.79)EPNVVS(-71.65)QAT(-125.45)S(-133.67)S(-156.97)T(-171.3)AVS(-210.49)AS(-223.48)K	8	4	0.67188	152230000	152230000	0	0	NaN	994	326	423	423	273;365	336;444	539;540;689	1231;1232;1233;1234;1235;1236;1237;1238;1537;1538	539	1232	31967	539	1232	31967	539	1232	31967
Q96KR1	470	Q96KR1	Zinc finger RNA-binding protein	ZFR	0.939603	12.1897	0	243.85	200.47	243.85	1	T	TVNTSSVATSSMKGLTTTGNSSLNSTSNTKV	X;X;X;X;X;X;X;X;X;X;X;X;X;X;X;GalT_UC1;X;X;X;X;X;X;X;X;X;X;X;X;X;X;X	XXXXXXXXXXXXXPPPPPPPPPPPPPPPPPX	GLT(0.94)T(0.057)T(0.004)GNSSLNSTSNTK	GLT(12.19)T(-12.19)T(-24.11)GNS(-90.04)S(-109.87)LNS(-170.43)T(-191.84)S(-203.33)NT(-220.03)K	3	3	0.19008	27523000	27523000	0	0	NaN	993	326	470	470	166	204	319	765;766	319	766	8586	319	766	8586	319	766	8586
Q96KR1	529	Q96KR1	Zinc finger RNA-binding protein	ZFR	0.90178	12.6417	3.68548e-196	196.88	179.94	196.88	1	T	GNKAEDIKGTECVKSTPVTSAVQIPEVKQDT	X;X;X;X;X;X;X;X;X;X;X;X;X;X;X;GalT_UC1;X;X;X;X;X;X;X;X;X;X;X;X;X;X;X	XXXXXXXXXXXXXXPPPPPPPPPPPPPPXXX	S(0.049)T(0.902)PVT(0.049)SAVQIPEVK	S(-12.64)T(12.64)PVT(-12.64)S(-42.22)AVQIPEVK	2	3	0.06687	106400000	106400000	0	0	NaN	1000	326	529	529	526	650	1001	2286;2287;2288;2289;2290;2291;2292;2293	1001	2289	35872	1001	2289	35872	1001	2289	35872
Q96L91	1624	Q96L91	E1A-binding protein p400	EP400	0.909405	10.0166	4.82306e-07	80.905	61.613	80.905	1	T	LASITGPQSRVAQPETPVTLQFQGSKFTLSH	X;X;X;X;X;X;X;X;X;X;X;X;X;X;X;GalT_UC1;X;X;X;X;X;X;X;X;X;X;X;X;X;X;X	XXXXXXXXXXPPPPPPPPPPPPPPPPXXXXX	VAQPET(0.909)PVT(0.091)LQFQGSK	VAQPET(10.02)PVT(-10.02)LQFQGS(-60.86)K	6	3	0.28696	10061000	10061000	0	0	NaN	1007	327	1624	1624	651	810	1271	2992	1271	2992	34377	1271	2992	34377	1271	2992	34377
Q96L91	2604	Q96L91	E1A-binding protein p400	EP400	0.894028	9.28499	0.00598972	49.31	41.939	49.31	1	T	QPQPVQAPAKAQPAITTGGSAAVLAGTIKTS	X;X;X;X;X;X;X;X;X;X;X;X;X;X;X;GalT_UC1;X;X;X;X;X;X;X;X;X;X;X;X;X;X;X	XXXXXXXXXXPPPPPPPPPPPPPPPPPPPXX	AQPAIT(0.894)T(0.105)GGS(0.001)AAVLAGTIK	AQPAIT(9.28)T(-9.28)GGS(-32.05)AAVLAGT(-49.03)IK	6	2	-0.2448	12383000	12383000	0	0	1.5426	1001	327	2604	2604	31	38	60	179;180	60	180	42745	60	180	42745	60	180	42745
Q96L91	2605	Q96L91	E1A-binding protein p400	EP400	0.957053	15.6186	3.93023e-05	68.481	52.662	68.481	1	T	PQPVQAPAKAQPAITTGGSAAVLAGTIKTSV	X;X;X;X;X;X;X;X;X;X;X;X;X;X;X;GalT_UC1;X;X;X;X;X;X;X;X;X;X;X;X;X;X;X	XXXXXXXXXPPPPPPPPPPPPPPPPPPPXXX	AQPAIT(0.026)T(0.957)GGS(0.017)AAVLAGTIK	AQPAIT(-15.62)T(15.62)GGS(-17.58)AAVLAGT(-51.59)IK	7	3	-0.45958	11322000	11322000	0	0	1.4104	1002	327	2605	2605	31	38	59	178	59	178	41093	59	178	41093	59	178	41093
Q96L91	2696	Q96L91	E1A-binding protein p400	EP400	0.97371	16.5703	2.90094e-51	125.61	108.32	125.61	1	S	PRAVGSPATATPDLVSMATTQGVRAVTSVTA	X;X;X;X;X;X;X;X;X;X;X;X;X;X;X;GalT_UC1;X;X;X;X;X;X;X;X;X;X;X;X;X;GalT_UC1;X	XXPPPPPPPPPPPPPPPPPPPPPPXXXXXXX	AVGS(0.021)PAT(0.003)AT(0.001)PDLVS(0.974)MAT(0.001)T(0.001)QGVR	AVGS(-16.57)PAT(-25.57)AT(-32.46)PDLVS(16.57)MAT(-30.88)T(-30.88)QGVR	14	3	-0.26915	61620000	61620000	0	0	NaN	443	327	2696	2696	66	88	148	400;401	148	401	52031	148	401	52031	148	401	52031
Q96L91	2700	Q96L91	E1A-binding protein p400	EP400	0.936588	11.6939	1.12937e-92	148.68	112.92	148.68	1	T	GSPATATPDLVSMATTQGVRAVTSVTASAVV	X;X;X;X;X;X;X;X;X;X;X;X;X;X;X;GalT_UC1;X;X;X;X;X;X;X;X;X;GalT_UC1;X;X;X;X;X	PPPPPPPPPPPPPPPPPPPPXXXXXXXXXXX	AVGSPATATPDLVSMAT(0.063)T(0.937)QGVR	AVGS(-107.15)PAT(-115.88)AT(-109)PDLVS(-55.19)MAT(-11.69)T(11.69)QGVR	18	3	-0.63582	81314000	81314000	0	0	NaN	1003	327	2700	2700	66	88	147	398;399	147	399	51449	147	399	51449	147	399	51449
Q96L91	2710	Q96L91	E1A-binding protein p400	EP400	0.994308	22.7915	5.01058e-270	217.37	193.48	217.37	1;2	T	VSMATTQGVRAVTSVTASAVVTTNLTPVQTP	X;GalT_UC1;X;X;X;GalT_UC1;X;X;X;X;X;X;X;X;X;GalT_UC1;X;X;X;X;X;GalT_UC1;X;X;X;X;X;X;X;X;X	XXXXXXXXXXPPPPPPPPPPPPPPPPPPPPP	AVTS(0.005)VT(0.994)ASAVVTTNLTPVQTPAR	AVT(-33.67)S(-22.79)VT(22.79)AS(-44.34)AVVT(-127.52)T(-136.4)NLT(-188.61)PVQT(-204.2)PAR	6	3	0.2207	139910000	110500000	29408000	0	NaN	1004	327	2710	2710	69	91;92	151;152	406;407;408;409;410;411;412	152	412	51135	152	412	51135	152	412	51135
Q96L91	2878	Q96L91	E1A-binding protein p400	EP400	0.994971	25.8865	1.31901e-116	162.36	128.57	162.36	1	T	TTVTAPRPGALLTGTTVANLQVARLTRVPTS	X;X;X;X;X;X;X;X;X;X;X;X;X;X;X;GalT_UC1;X;X;X;X;X;X;X;X;X;X;X;X;X;X;X	XXXXXXXPPPPPPPPPPPPPPPPPXXXXXXX	PGALLT(0.002)GT(0.003)T(0.995)VANLQVAR	PGALLT(-26.06)GT(-25.89)T(25.89)VANLQVAR	9	3	-0.29851	21898000	21898000	0	0	NaN	1006	327	2878	2878	360	438	683	1523;1524	683	1524	44497	683	1524	44497	683	1524	44497
Q96MY1	375	Q96MY1	Nucleolar protein 4-like	NOL4L	0.932336	11.4168	0	356.9	336.52	356.9	1	S	NHSNGPTDLSMKGGASTTSTTPTPTPSSTST	X;X;X;X;X;X;X;X;X;X;X;X;X;X;X;GalT_UC1;X;X;X;X;X;X;X;X;X;X;X;X;X;X;X	XXXXXXXXXXXXPPPPPPPPPPPPPPPPPPP	GGAS(0.932)T(0.067)TSTTPTPTPSSTSTSRPVPTAQLSPTEISAVR	GGAS(11.42)T(-11.42)T(-33.86)S(-66.54)T(-77.16)T(-108.21)PT(-137.97)PT(-166.4)PS(-184.59)S(-202.13)T(-210.65)S(-227.18)T(-227.18)S(-235.18)RPVPT(-284.39)AQLS(-325.37)PT(-335.87)EIS(-352.55)AVR	4	4	0.42056	63414000	63414000	0	0	NaN	445	328	375	375	155	191	301	730;731	301	731	45155	301	731	45155	301	731	45155
Q96PK6	225	Q96PK6	RNA-binding protein 14	RBM14	0.998247	27.5865	1.61081e-06	56.599	51.798	56.599		S	FGRDRSPLRRSPPRASYVAPLTAQPATYRAQ	X;X;X;X;X;X;X;X;X;X;X;X;X;X;X;GalT_UC1;X;X;X;X;X;X;X;X;X;X;X;X;X;X;X	XXXXXXXXXXXXXXPPPPPPPPPPPPPPPXX	AS(0.998)YVAPLT(0.002)AQPATYR	AS(27.59)YVAPLT(-27.59)AQPAT(-48.94)YR	2	3	0.25089	22516000	22516000	0	0	NaN	449	329	225	225	55	73	128	370	128	370	30285	128	370	30285	128	370	30285
Q96PK6	244	Q96PK6	RNA-binding protein 14	RBM14	0.938554	11.8396	9.3728e-103	160.75	135.28	160.75	1	S	PLTAQPATYRAQPSVSLGAAYRAQPSASLGV	X;X;X;X;X;X;X;X;X;X;X;X;X;X;X;GalT_UC1;X;X;X;X;X;X;X;X;X;X;X;GalT_UC1;X;X;X	XXXXXXXXXXPPPPPPPPPPPPXXXXXXXXX	AQPS(0.061)VS(0.939)LGAAYR	AQPS(-11.84)VS(11.84)LGAAYR	6	3	0.051512	665750000	665750000	0	0	NaN	447	329	244	244	34	42	64	188;189;190;191;192;193	64	189	18929	64	189	18929	64	189	18929
Q96PK6	280	Q96PK6	RNA-binding protein 14	RBM14	0.908579	9.97315	9.17421e-56	136.36	113.67	136.36	1	S	PMTAQAASYRAQPSVSLGAPYRGQLASPSSQ	X;X;X;X;X;X;X;X;X;X;X;X;X;X;X;GalT_UC1;X;X;X;X;X;X;X;X;X;X;X;X;X;X;X	XXXXXXXXXXPPPPPPPPPPPPXXXXXXXXX	AQPS(0.091)VS(0.909)LGAPYR	AQPS(-9.97)VS(9.97)LGAPYR	6	3	-0.10776	474360000	474360000	0	0	5.4233	448	329	280	280	35	43	65	194;195;196;197;198;199;200;201	65	197	21172	65	197	21172	65	197	21172
Q96PK6	521	Q96PK6	RNA-binding protein 14	RBM14	0.848701	10.5544	0	228.84	212.52	228.84	1	S	AQPSATLAAPYRTQSSASLAASYAAQQHPQA	X;X;X;X;X;X;X;X;X;X;X;X;X;X;X;GalT_UC1;X;X;X;X;X;X;X;X;X;X;X;X;X;X;X	XXXXXXXXXXXXPPPPPPPPPPPPPPPPPPP	T(0.075)QS(0.075)S(0.849)AS(0.002)LAASYAAQQHPQAAASYR	T(-10.55)QS(-10.55)S(10.55)AS(-26.5)LAAS(-121.18)YAAQQHPQAAAS(-220)YR	4	3	0.86631	10712000	10712000	0	0	NaN	451	329	521	521	606	754	1194	2826;2827;2828;2829;2830;2831	1194	2831	21767	1194	2831	21767	1194	2831	21767
Q96QT6	617	Q96QT6	PHD finger protein 12	PHF12	0.768524	11.2459	0.000103924	54.626	46.729	54.626	1	S	VKTENATGPSSCPQRSLVPVPSLPPSIPSSC	X;X;X;X;X;X;X;X;X;X;X;X;X;X;X;GalT_UC1;X;X;X;X;X;X;X;X;X;X;X;X;X;X;X	XXXXXXXXXXXXXXXPPPPPPPPPPPPPPPP	S(0.769)LVPVPS(0.058)LPPS(0.058)IPS(0.058)S(0.058)CAS(0.001)IENTSTLQR	S(11.25)LVPVPS(-11.25)LPPS(-11.25)IPS(-11.25)S(-11.25)CAS(-30.38)IENT(-49.08)S(-49.08)T(-49.08)LQR	1	3	-0.41069	15297000	15297000	0	0	NaN	452	332	617	617	473	580	894	2038;2039	894	2039	75516	894	2039	75516	894	2039	75516
Q96QT6	684	Q96QT6	PHD finger protein 12	PHF12	0.873107	8.37652	5.07075e-09	81.656	63.847	81.656	1	T	VLTPPQAAGDGILATTANQRFSSPAPSSDGK	X;X;X;X;X;X;X;X;X;X;X;X;X;X;X;GalT_UC1;X;X;X;X;X;X;X;X;X;X;X;X;X;X;X	PPPPPPPPPPPPPPPPPPPPXXXXXXXXXXX	VLTPPQAAGDGILAT(0.127)T(0.873)ANQR	VLT(-51.17)PPQAAGDGILAT(-8.38)T(8.38)ANQR	16	3	0.38082	9177600	9177600	0	0	NaN	1011	332	684	684	669	834	1307	3090;3091	1307	3091	40738	1307	3091	40738	1307	3091	40738
Q96RK0	534	Q96RK0	Protein capicua homolog	CIC	0.89719	10.0591	0	268.43	256.65	268.43	2	S	DPPVAFGKGYGSAPSSSASSPASSSASAATS	X;X;X;X;X;X;X;X;X;X;X;X;X;X;X;GalT_UC1;X;X;X;GalT_UC1;X;X;X;GalT_UC1;X;X;X;X;X;X;X	XXXXXXXXPPPPPPPPPPPPPPPPPPPPPPP	GYGSAPS(0.009)S(0.897)S(0.089)AS(0.032)S(0.312)PAS(0.315)S(0.315)S(0.031)ASAATSFSLGSGTFK	GYGS(-39.36)APS(-19.97)S(10.06)S(-10.06)AS(-10.06)S(0)PAS(0)S(0)S(-10.06)AS(-47.57)AAT(-102.43)S(-127.07)FS(-178.51)LGS(-220.08)GT(-220.08)FK	8	4	-0.1884	110620000	0	110620000	0	NaN	453	333	534	534	183	224	347	820;821	347	821	38401	347	821	38401	347	821	38401
Q96RN5	405	Q96RN5	Mediator of RNA polymerase II transcription subunit 15	MED15	0.941719	12.084	0	254.89	235.28	254.89	1	T	LAQGGMHIRARFPPTTAVSAIPSSSIPLGRQ	X;X;X;X;X;X;X;X;X;X;X;X;X;X;X;GalT_UC1;X;X;X;X;X;X;X;X;X;X;X;X;X;X;X	XXXXXXXXXXXPPPPPPPPPPPPPPPPPPPX	FPPT(0.058)T(0.942)AVSAIPSSSIPLGR	FPPT(-12.08)T(12.08)AVS(-77.99)AIPS(-169.39)S(-194.4)S(-209.27)IPLGR	5	3	0.011201	134890000	134890000	0	0	NaN	1013	334	405	405	136	169	272	674;675;676;677;678;679;680;681;682;683;684;685	272	683	62109	272	683	62109	272	683	62109
Q96S52	368	Q96S52	GPI transamidase component PIG-S	PIGS	0.999204	30.9878	4.4898e-14	101.9	85.319	101.9	1	T	SPRWGGIMVYNVDSKTYNASVLPVRVEVDMV	X;X;X;X;X;X;X;X;X;X;X;X;X;X;X;GalT_UC1;X;X;X;X;X;X;X;X;X;X;X;X;X;X;X	XXXXXXXXXXXXXXXPPPPPPPPPPXXXXXX	T(0.999)YNAS(0.001)VLPVR	T(30.99)YNAS(-30.99)VLPVR	1	3	-0.36507	30908000	30908000	0	0	NaN	1014	335	368	368	646	805	1265	2980;2981;2982	1265	2980	21817	1265	2980	21817	1265	2980	21817
Q96T58	2471	Q96T58	Msx2-interacting protein	SPEN	0.908998	10.0953	2.39412e-167	169.84	153.78	169.84	1	T	SDPVTPPSDPSIPIPTLPSVTAAKLSPPVAS	X;X;X;X;X;X;X;X;X;X;X;X;X;X;X;GalT_UC1;X;X;X;X;X;X;X;X;X;X;X;X;X;X;X	PPPPPPPPPPPPPPPPPPPPPPPPXXXXXXX	VHSIIESDPVTPPS(0.001)DPS(0.089)IPIPT(0.909)LPS(0.001)VTAAK	VHS(-99.75)IIES(-66.17)DPVT(-39.13)PPS(-29.67)DPS(-10.1)IPIPT(10.1)LPS(-29.67)VT(-57.39)AAK	22	4	-0.081596	21436000	21436000	0	0	NaN	1025	337	2471	2471	662	822	1287	3036;3037	1287	3037	78548	1287	3037	78548	1287	3037	78548
Q96T58	2522	Q96T58	Msx2-interacting protein	SPEN	0.999999	62.7508	2.84541e-30	115.33	98.664	115.33	1	T	EPRAQSTPSPALPPDTKASDVDTSSSTLRKI	X;X;X;X;X;X;X;X;X;X;X;X;X;X;X;GalT_UC1;X;X;GalT_UC1;X;X;X;X;X;X;X;X;X;X;X;X	XXXPPPPPPPPPPPPPPXXXXXXXXXXXXXX	AQSTPSPALPPDT(1)K	AQS(-90.8)T(-70.82)PS(-62.75)PALPPDT(62.75)K	13	3	0.34612	110090000	110090000	0	0	NaN	1019	337	2522	2522	40	50	85;86	242;243;244;245;246;247;248;249;250;251	85	248	14389	85	248	14389	85	248	14389
Q96T58	2525	Q96T58	Msx2-interacting protein	SPEN	0.890513	9.71503	0.00364151	62.408	51.142	62.408	1	S	AQSTPSPALPPDTKASDVDTSSSTLRKILMD	X;X;X;X;X;X;X;X;X;X;X;X;GalT_UC1;X;X;GalT_UC1;X;X;X;X;X;X;X;X;X;X;X;X;X;X;X	XXXXXXXXXXXXXXPPPPPPPPPPPPXXXXX	AS(0.891)DVDT(0.095)S(0.012)S(0.002)STLR	AS(9.72)DVDT(-9.72)S(-18.86)S(-26.12)S(-33.78)T(-35)LR	2	3	-1.087	147370000	147370000	0	0	NaN	458	337	2525	2525	42	54	96	292;293	96	293	7337	96	293	7337	96	293	7337
Q96T58	2586	Q96T58	Msx2-interacting protein	SPEN	0.995166	23.136	0	251.87	230.04	251.87		T	APPPPVDSKKPLEEKTAPPVTNNSEIQASEV	X;X;X;X;X;X;X;X;X;X;X;X;X;X;X;GalT_UC1;X;X;X;X;X;X;X;X;X;X;X;X;X;X;X	XXXXXXXXXXXXXXXPPPPPPPPPPPPPPPP	T(0.995)APPVT(0.005)NNSEIQASEVLVAADK	T(23.14)APPVT(-23.14)NNS(-116.32)EIQAS(-216.19)EVLVAADK	1	3	0.23035	25323000	25323000	0	0	NaN	1023	337	2586	2586	547;548	680;681	1086	2519	1086	2519	48619	1086	2519	48619	1086	2519	48619
Q96T58	2591	Q96T58	Msx2-interacting protein	SPEN	0.913207	10.2209	0	225.37	212.74	225.37	1	T	VDSKKPLEEKTAPPVTNNSEIQASEVLVAAD	X;X;X;X;X;X;X;X;X;X;X;X;X;X;X;GalT_UC1;X;X;X;X;X;X;X;X;X;X;X;X;X;X;X	XXXXXXXXXXPPPPPPPPPPPPPPPPPPPPP	T(0.087)APPVT(0.913)NNSEIQASEVLVAADKEK	T(-10.22)APPVT(10.22)NNS(-58.47)EIQAS(-139.88)EVLVAADKEK	6	4	-0.45383	13762000	13762000	0	0	NaN	1024	337	2591	2591	547;548	680;681	1087	2520;2521	1087	2521	41844	1087	2521	41844	1087	2521	41844
Q96T58	2810	Q96T58	Msx2-interacting protein	SPEN	0.943755	12.2477	0	238.98	225.13	238.98	1	T	DRPADAGSGAGLRVNTSEGVVLLSYSGQKTE	X;X;X;X;X;X;X;X;X;X;X;X;X;X;X;GalT_UC1;X;X;X;X;X;X;X;X;X;X;X;X;X;X;X	XXXXXXXXXXXXXPPPPPPPPPPPPPPPPXX	VNT(0.944)S(0.056)EGVVLLSYSGQK	VNT(12.25)S(-12.25)EGVVLLS(-196.86)YS(-210.03)GQK	3	3	0.083485	134210000	134210000	0	0	NaN	1026	337	2810	2810	676	842	1324	3137;3138;3139;3140;3141;3142	1324	3138	37231	1324	3138	37231	1324	3138	37231
Q96T58	2921	Q96T58	Msx2-interacting protein	SPEN	0.973594	15.9164	9.65301e-253	205.62	170.45	182.82	1	T	RPSLEKPEPIHLSVSTPVTQGGTVKVLTQGI	X;X;X;X;X;X;X;X;X;X;X;X;X;X;X;GalT_UC1;X;X;X;X;X;X;X;X;X;X;X;X;X;X;X	PPPPPPPPPPPPPPPPPPPPPPPPPXXXXXX	ADRPSLEKPEPIHLSVS(0.001)T(0.974)PVT(0.025)QGGTVK	ADRPS(-122.55)LEKPEPIHLS(-46.14)VS(-28.27)T(15.92)PVT(-15.92)QGGT(-85.59)VK	18	4	0.75168	259820000	259820000	0	0	1.4016	1017	337	2921	2921	6	7	8;10	19;20;21;22;23;24;31	8	21	34767	9	26	34853	9	26	34853
Q99594	156	Q99594	Transcriptional enhancer factor TEF-5	TEAD3	0.994472	23.4052	1.68884e-31	94.09	66.323	94.09	1	S	QNKFSPPSPLPQAVFSTSSRFWSSPPLLGQQ	X;X;X;X;X;X;X;X;X;X;X;X;X;X;X;GalT_UC1;X;X;X;X;X;X;X;X;X;X;X;X;X;X;X	XXXPPPPPPPPPPPPPPPPPXXXXXXXXXXX	FSPPSPLPQAVFS(0.994)T(0.005)S(0.001)SR	FS(-50.5)PPS(-50.5)PLPQAVFS(23.41)T(-23.41)S(-30.2)S(-47.16)R	13	3	0.31924	0	0	0	0	NaN	461	338	156	156	139	172	278	691	278	691	57445	278	691	57445	278	691	57445
Q99614	187	Q99614	Tetratricopeptide repeat protein 1	TTC1	1	50.2923	0.00797055	50.292	26.543	50.292	1	S	EMAINDCSKAIQLNPSYIRAILRRAELYEKT	X;X;X;X;X;X;X;X;X;X;X;X;X;X;X;GalT_UC1;X;X;X;X;X;X;X;X;X;X;X;X;X;X;X	XXXXXXXXXPPPPPPPPPPXXXXXXXXXXXX	AIQLNPS(1)YIR	AIQLNPS(50.29)YIR	7	3	1.0056	2507200	2507200	0	0	NaN	462	339	187	187	16	18	30	82	30	82	47540	30	82	47540	30	82	47540
Q99700	216	Q99700	Ataxin-2	ATXN2	0.759715	9.93883	8.86351e-290	206.34	198.16	206.34	1	S	GSGLLASPAAAPSPSSSSVSSSSATAPSSVV	X;X;X;X;X;X;X;X;X;X;X;X;X;X;X;GalT_UC1;X;X;X;X;X;X;X;X;X;X;X;X;X;X;X	PPPPPPPPPPPPPPPPPPPPPPPPPPPPPPP	KPGGSGLLASPAAAPS(0.008)PS(0.077)S(0.76)S(0.077)S(0.077)VS(0.001)SSSATAPSSVVAATSGGGR	KPGGS(-90.15)GLLAS(-54.98)PAAAPS(-19.71)PS(-9.94)S(9.94)S(-9.94)S(-9.94)VS(-29.3)S(-38.72)S(-47.96)S(-57.02)AT(-74.56)APS(-83.05)S(-91.33)VVAAT(-107.64)S(-115.87)GGGR	19	3	0.33578	651180000	651180000	0	0	58.539	464	340	216	216	250	307	494;495	1148;1149;1150;1151;1152;1153	495	1151	44307	495	1151	44307	495	1151	44307
Q99856	408	Q99856	AT-rich interactive domain-containing protein 3A	ARID3A	0.999017	30.07	0.00253489	62.694	44.83	62.694	1	T	PAPKIKKEEDSAIPITVPGRLPVSLAGHPVV	X;X;X;X;X;X;X;X;X;X;X;X;X;X;X;GalT_UC1;X;X;X;X;X;X;X;X;X;X;X;X;X;X;X	XXXXXXXPPPPPPPPPPPPPXXXXXXXXXXX	EEDS(0.001)AIPIT(0.999)VPGR	EEDS(-30.07)AIPIT(30.07)VPGR	9	3	-0.23579	8977100	8977100	0	0	2.2964	1027	341	408	408	97	122	199	496;497	199	497	37367	199	497	37367	199	497	37367
Q9BQC3	470	Q9BQC3	Diphthamide biosynthesis protein 2	DPH2	0.992297	21.1111	2.7038e-56	138.25	112.86	138.25	1	T	RSWQGLEPRLGQTPVTEAVSGRRGIAIAYED	X;X;X;X;X;X;X;X;X;X;X;X;X;X;X;GalT_UC1;X;X;X;X;X;X;X;X;X;X;X;X;X;X;X	XXXXXXXXXPPPPPPPPPPPPPXXXXXXXXX	LGQT(0.008)PVT(0.992)EAVSGR	LGQT(-21.11)PVT(21.11)EAVS(-46.93)GR	7	3	-0.017978	126980000	126980000	0	0	NaN	1028	342	470	470	274	337	541	1239;1240;1241;1242	541	1240	14984	541	1240	14984	541	1240	14984
Q9BTC0	1288	Q9BTC0	Death-inducer obliterator 1	DIDO1	0.96238	11.6494	0	231.44	215.74	231.44	2	T	LKVLSSLKPAAPSPATAATTAAAASTAASST	X;X;X;X;X;X;X;X;X;X;X;X;X;X;X;GalT_UC1;X;X;GalT_UC1;X;X;X;X;X;X;X;X;X;X;X;X	XXPPPPPPPPPPPPPPPPPPPPPPPPPPPPP	VLSSLKPAAPS(0.005)PAT(0.962)AAT(0.516)T(0.516)AAAASTAASSTASSASK	VLS(-97.38)S(-87.44)LKPAAPS(-23.1)PAT(11.65)AAT(0)T(0)AAAAS(-66.85)T(-87.44)AAS(-134.73)S(-159.92)T(-171.63)AS(-171.63)S(-179.8)AS(-179.8)K	14	4	0.08629	22777000	0	22777000	0	0.24837	1031	344	1288	1288	347;667	425;830;832	1298	3065;3066;3067	1298	3067	26708	1298	3067	26708	1298	3067	26708
Q9BTC0	1291	Q9BTC0	Death-inducer obliterator 1	DIDO1	0.910851	10.8217	0	303.13	292.81	303.13	1;2	T	LSSLKPAAPSPATAATTAAAASTAASSTASS	X;X;X;X;X;X;X;X;X;X;X;X;GalT_UC1;X;X;GalT_UC1;GalT_UC1;X;X;X;X;X;X;X;X;X;X;X;X;X;X	PPPPPPPPPPPPPPPPPPPPPPPPPPPPPPP	VLSSLKPAAPS(0.007)PAT(0.007)AAT(0.911)T(0.075)AAAASTAASSTASSASK	VLS(-93.72)S(-83.91)LKPAAPS(-21.22)PAT(-21.22)AAT(10.82)T(-10.82)AAAAS(-63.81)T(-103.39)AAS(-148.87)S(-159.12)T(-178.78)AS(-215.1)S(-231.6)AS(-252.92)K	17	4	0.50422	892570000	840280000	52289000	0	9.7327	1032	344	1291	1291	347;667	425;830;832	1297;1298;1301;1303	3063;3064;3065;3066;3067;3078;3079;3080;3081;3084;3085	1301	3081	34859	1301	3081	34859	1301	3081	34859
Q9BTC0	1292	Q9BTC0	Death-inducer obliterator 1	DIDO1	0.888058	9.00775	0	231.44	215.74	142.85	1;2	T	SSLKPAAPSPATAATTAAAASTAASSTASSA	X;X;X;X;X;X;X;X;X;X;X;X;X;X;GalT_UC1;GalT_UC1;X;X;X;X;X;X;X;X;X;X;X;X;X;X;X	PPPPPPPPPPPPPPPPPPPPPPPPPPPPPPP	PAAPSPATAAT(0.112)T(0.888)AAAASTAASSTASSASK	PAAPS(-42.92)PAT(-34.77)AAT(-9.01)T(9.01)AAAAS(-67.61)T(-75.96)AAS(-83.48)S(-90.67)T(-91.91)AS(-99.25)S(-112.64)AS(-118.62)K	12	3	-0.36239	86255000	33966000	52289000	0	0.94054	1033	344	1292	1292	347;667	425;830;832	666;1297;1298	1480;1481;3063;3064;3065;3066;3067	666	1481	24648	1298	3067	26708	1298	3067	26708
Q9BWF3	297	Q9BWF3	RNA-binding protein 4	RBM4	0.857673	7.83023	6.16077e-124	152.27	141.26	152.27	1	T	AAATAAAAAAAAAAVTAASTSYYGRDRSPLR	X;X;X;X;X;X;X;X;X;X;X;X;X;X;X;GalT_UC1;X;X;X;X;X;X;X;X;X;X;X;X;X;X;X	PPPPPPPPPPPPPPPPPPPPPPPPPXXXXXX	HLLPTS(0.001)GAAAT(0.141)AAAAAAAAAAVT(0.858)AASTSYYGR	HLLPT(-37.52)S(-30.34)GAAAT(-7.83)AAAAAAAAAAVT(7.83)AAS(-44.39)T(-66.09)S(-76.73)YYGR	23	4	0.18615	32116000	32116000	0	0	3.2647	1037	346	297	297	191	234	367	859;860;861;862;863;864;865	367	862	77693	367	862	77693	367	862	77693
Q9BYJ9	196	Q9BYJ9	YTH domain-containing family protein 1	YTHDF1	0.989814	21.9887	0.00289626	57.106	16.391	57.106	1	S	NSLEQGMVGLKIGDVSSSAVKTVGSVVSSVA	X;X;X;X;X;X;X;X;X;X;X;X;X;X;X;GalT_UC1;X;X;X;X;X;X;X;X;X;X;X;X;X;X;X	XXXXXXXXXXXPPPPPPPPPPXXXXXXXXXX	IGDVS(0.99)S(0.006)S(0.004)AVK	IGDVS(21.99)S(-21.99)S(-24.02)AVK	5	2	-0.084024	860770000	860770000	0	0	NaN	468	347	196	196	206	252	395;396;397	939;940;941;942	395	939	7449	395	939	7449	396	940	7732
Q9BZL6	395	Q9BZL6	Serine/threonine-protein kinase D2	PRKD2	0.941271	16.6353	0.0205894	42.109	9.0207	42.109	2	S	PLMRVVQSVRHTTRKSSTTLREGWVVHYSNK	X;X;X;X;X;X;X;X;X;X;X;X;X;X;X;GalT_UC1;GalT_UC1;X;X;X;X;X;X;X;X;X;X;X;X;X;X	XXXXXXXXXXXXXXPPPPPPPXXXXXXXXXX	KS(0.941)S(0.941)T(0.059)T(0.059)LR	KS(16.64)S(16.64)T(-16.64)T(-16.64)LR	2	3	0.53138	0	0	0	0	NaN	469	348	395	395	253	311	502	1164	502	1164	15287	502	1164	15287	502	1164	15287
Q9BZL6	396	Q9BZL6	Serine/threonine-protein kinase D2	PRKD2	0.941271	16.6353	0.0205894	42.109	9.0207	42.109	2	S	LMRVVQSVRHTTRKSSTTLREGWVVHYSNKD	X;X;X;X;X;X;X;X;X;X;X;X;X;X;GalT_UC1;GalT_UC1;X;X;X;X;X;X;X;X;X;X;X;X;X;X;X	XXXXXXXXXXXXXPPPPPPPXXXXXXXXXXX	KS(0.941)S(0.941)T(0.059)T(0.059)LR	KS(16.64)S(16.64)T(-16.64)T(-16.64)LR	3	3	0.53138	0	0	0	0	NaN	470	348	396	396	253	311	502	1164	502	1164	15287	502	1164	15287	502	1164	15287
Q9C0C7	440	Q9C0C7	Activating molecule in BECN1-regulated autophagy protein 1	AMBRA1	1	67.1405	9.86716e-86	157.24	129.56	157.24	1;2	T	SLNSRSEAESMPPPRTSASSVSLLSVLRQQE	X;X;X;X;X;X;X;X;X;X;X;X;X;X;X;GalT_UC1;GalT_UC1;X;X;X;X;X;X;X;X;X;X;X;X;X;X	XXXXXXXXXXXXXXXPPPPPPPPPPPPPXXX	T(1)S(1)ASSVSLLSVLR	T(67.14)S(49.73)AS(-49.73)S(-67.14)VS(-83.15)LLS(-94.06)VLR	1	4	0.31124	120700000	64157000	56542000	0	14.112	1038	349	440	440	612	760;762	1203;1204;1206;1208	2843;2844;2845;2848;2849;2851	1204	2845	36996	1204	2845	36996	1204	2845	36996
Q9C0C7	441	Q9C0C7	Activating molecule in BECN1-regulated autophagy protein 1	AMBRA1	0.999989	49.7302	9.86716e-86	157.24	129.56	157.24	2	S	LNSRSEAESMPPPRTSASSVSLLSVLRQQEG	X;X;X;X;X;X;X;X;X;X;X;X;X;X;GalT_UC1;GalT_UC1;X;X;X;X;X;X;X;X;X;X;X;X;X;X;X	XXXXXXXXXXXXXXPPPPPPPPPPPPPXXXX	T(1)S(1)ASSVSLLSVLR	T(67.14)S(49.73)AS(-49.73)S(-67.14)VS(-83.15)LLS(-94.06)VLR	2	4	0.31124	56542000	0	56542000	0	6.6106	471	349	441	441	612	760;762	1203;1204	2843;2844;2845	1204	2845	36996	1204	2845	36996	1204	2845	36996
Q9C0D5	1477	Q9C0D5	Protein TANC1	TANC1	0.999939	42.1967	1.51611e-56	141.1	102.86	141.1	1	S	EETSPQEESVSPTPRSQPSSSVPSSYIRNLQ	X;X;X;X;X;X;X;X;X;X;X;X;X;X;X;GalT_UC1;X;X;X;X;X;X;X;X;X;X;X;X;X;X;X	XXXXXXXXXXXXXXXPPPPPPPPPPPPPXXX	S(1)QPSSSVPSSYIR	S(42.2)QPS(-42.2)S(-59.47)S(-84.46)VPS(-107.01)S(-118.08)YIR	1	3	-0.13094	15573000	15573000	0	0	NaN	472	350	1477	1477	493	603	924	2121;2122	924	2122	15139	924	2122	15139	924	2122	15139
Q9C0D7	528	Q9C0D7	Probable ribonuclease ZC3H12C	ZC3H12C	0.97279	16.7734	2.8912e-07	83.438	57.326	83.438	1	S	LETRSVPSLVSIPATSTAKPQSTTSLSNGLP	X;X;X;X;X;X;X;X;X;X;X;X;X;X;X;GalT_UC1;X;X;X;X;X;X;X;X;X;X;X;X;X;X;X	XXXXPPPPPPPPPPPPPPPXXXXXXXXXXXX	SVPSLVSIPAT(0.02)S(0.973)T(0.007)AK	S(-67.26)VPS(-61.55)LVS(-41.82)IPAT(-16.77)S(16.77)T(-21.62)AK	12	3	-0.036427	3262800	3262800	0	0	NaN	473	351	528	528	535	663	1036	2386	1036	2386	37983	1036	2386	37983	1036	2386	37983
Q9H0E3	300	Q9H0E3	Histone deacetylase complex subunit SAP130	SAP130	0.999634	34.6281	1.5937e-21	100.41	79.472	91.637	1	S	IPPAVVATVSATRAQSPVITTTAAHATDSAL	X;X;X;X;X;X;X;X;X;X;X;X;X;X;X;GalT_UC1;X;X;X;X;X;X;X;X;X;X;X;X;X;X;X	XXXXXXXXXXXXXPPPPPPPPPPPPPPPPPP	AQS(1)PVITTTAAHATDSALSR	AQS(34.63)PVIT(-34.63)T(-50.12)T(-49.33)AAHAT(-79.85)DS(-84.06)ALS(-84.06)R	3	3	0.18753	84043000	84043000	0	0	NaN	474	352	300	300	39	48;49	82;84	237;238;241	84	241	19198	83	240	21193	83	240	21193
Q9H0E3	305	Q9H0E3	Histone deacetylase complex subunit SAP130	SAP130	0.879719	8.22418	1.10661e-107	157.23	133.63	108.63	2	T	VATVSATRAQSPVITTTAAHATDSALSRPTL	X;X;X;X;X;X;X;X;X;X;X;X;X;X;GalT_UC1;GalT_UC1;GalT_UC1;X;X;X;X;X;X;X;X;X;X;X;X;X;X	XXXXXXXXPPPPPPPPPPPPPPPPPPPPXXX	AQS(0.002)PVIT(0.211)T(0.88)T(0.907)AAHATDSALSR	AQS(-27.21)PVIT(-8.22)T(8.22)T(9.29)AAHAT(-60.11)DS(-74.79)ALS(-74.79)R	8	5	0.22749	109470000	0	109470000	0	NaN	1040	352	305	305	39	48;49	80;81	232;233;234;235;236	80	233	14564	81	235	14660	81	235	14660
Q9H0E3	306	Q9H0E3	Histone deacetylase complex subunit SAP130	SAP130	0.90662	9.29035	1.10661e-107	157.23	133.63	108.63	2	T	ATVSATRAQSPVITTTAAHATDSALSRPTLS	X;X;X;X;X;X;X;X;X;X;X;X;X;X;GalT_UC1;GalT_UC1;X;X;X;X;X;X;X;X;X;X;X;X;X;X;GalT_UC1	XXXXXXXPPPPPPPPPPPPPPPPPPPPXXXX	AQS(0.002)PVIT(0.211)T(0.88)T(0.907)AAHATDSALSR	AQS(-27.21)PVIT(-8.22)T(8.22)T(9.29)AAHAT(-60.11)DS(-74.79)ALS(-74.79)R	9	5	0.22749	109470000	0	109470000	0	NaN	1041	352	306	306	39	48;49	80;81	232;233;234;235;236	80	233	14564	81	235	14660	81	235	14660
Q9H0E3	327	Q9H0E3	Histone deacetylase complex subunit SAP130	SAP130	0.993	24.5883	2.18528e-83	148.89	123.42	148.89	1	S	DSALSRPTLSIQHPPSAAISIQRPAQSRDVT	X;X;X;X;X;X;X;X;X;X;X;X;X;X;X;GalT_UC1;X;X;X;X;X;X;X;X;X;X;X;X;X;X;X	XXXXXXPPPPPPPPPPPPPPPPPXXXXXXXX	PTLS(0.003)IQHPPS(0.993)AAIS(0.003)IQR	PT(-35.54)LS(-24.59)IQHPPS(24.59)AAIS(-24.82)IQR	10	4	0.032893	35981000	35981000	0	0	4.6667	476	352	327	327	387	472	730	1652;1653;1654;1655	730	1655	35812	730	1655	35812	730	1655	35812
Q9H0E3	346	Q9H0E3	Histone deacetylase complex subunit SAP130	SAP130	0.999332	31.7464	1.49524e-09	89.266	73.128	89.266	1	T	SIQRPAQSRDVTTRITLPSHPALGTPKQQLH	X;X;X;X;X;X;X;X;X;X;X;X;X;X;X;GalT_UC1;X;X;X;X;X;X;X;X;X;X;X;X;X;X;X	XXXXXXXXXXXXXXPPPPPPPPPPPPPXXXX	IT(0.999)LPS(0.001)HPALGTPK	IT(31.75)LPS(-31.75)HPALGT(-83.23)PK	2	3	0.13995	25328000	25328000	0	0	1.1118	1042	352	346	346	236	290	466	1092;1093	466	1093	24026	466	1093	24026	466	1093	24026
Q9H0E9	276	Q9H0E9	Bromodomain-containing protein 8	BRD8	0.939163	12.8932	5.88844e-06	47.018	43.524	47.018	1	T	ASGAPTLSRLLEAGPTQFTTPLASFTTVASE	X;X;X;X;X;X;X;X;X;X;X;X;X;X;X;GalT_UC1;X;X;X;X;X;X;X;X;X;X;X;X;X;X;X	XXXXXXXXXPPPPPPPPPPPPPPPPPPPPPP	LLEAGPT(0.939)QFT(0.048)T(0.012)PLASFTTVASEPPVK	LLEAGPT(12.89)QFT(-12.89)T(-18.87)PLAS(-36.41)FT(-39.62)T(-41.11)VAS(-44.88)EPPVK	7	3	0.59115	3544700	3544700	0	0	NaN	1043	353	276	276	279	343	549	1263	549	1263	83468	549	1263	83468	549	1263	83468
Q9H0E9	284	Q9H0E9	Bromodomain-containing protein 8	BRD8	0.819517	8.68271	4.32186e-101	150.29	136.05	150.29	1	S	RLLEAGPTQFTTPLASFTTVASEPPVKLVPP	X;X;X;X;X;X;X;X;X;X;X;X;X;X;X;GalT_UC1;X;X;X;X;X;X;X;X;X;X;X;X;X;X;X	XPPPPPPPPPPPPPPPPPPPPPPPPPPXXXX	LLEAGPTQFT(0.001)T(0.005)PLAS(0.82)FT(0.111)T(0.063)VASEPPVK	LLEAGPT(-39.68)QFT(-30.91)T(-21.9)PLAS(8.68)FT(-8.68)T(-11.11)VAS(-42.83)EPPVK	15	4	0.3336	6622800	6622800	0	0	NaN	477	353	284	284	279	343	548	1259;1260;1261;1262	548	1262	81366	548	1262	81366	548	1262	81366
Q9H1B7	7	Q9H1B7	Interferon regulatory factor 2-binding protein-like	IRF2BPL	0.984021	19.2132	0.0280914	53.968	35.511	53.968	2	S	_________MSAAQVSSSRRQSCYLCDLPRM	X;X;X;X;X;X;X;X;X;X;X;X;X;X;X;GalT_UC1;GalT_UC1;X;X;X;X;X;X;X;X;X;X;X;X;X;X	XXXXXXXXXPPPPPPPPPPXXXXXXXXXXXX	MS(0.024)AAQVS(0.984)S(0.957)S(0.035)R	MS(-19.21)AAQVS(19.21)S(14.95)S(-14.95)R	7	3	0.6585	304900000	0	304900000	0	NaN	479	354	7	7	317	389	610	1366	610	1366	13956	610	1366	13956	610	1366	13956
Q9H1B7	8	Q9H1B7	Interferon regulatory factor 2-binding protein-like	IRF2BPL	0.95719	14.946	0.0280914	53.968	35.511	53.968	2	S	________MSAAQVSSSRRQSCYLCDLPRMP	X;X;X;X;X;X;X;X;X;X;X;X;X;X;GalT_UC1;GalT_UC1;X;X;X;X;X;X;X;X;X;X;X;X;X;X;X	XXXXXXXXPPPPPPPPPPXXXXXXXXXXXXX	MS(0.024)AAQVS(0.984)S(0.957)S(0.035)R	MS(-19.21)AAQVS(19.21)S(14.95)S(-14.95)R	8	3	0.6585	304900000	0	304900000	0	NaN	480	354	8	8	317	389	610	1366	610	1366	13956	610	1366	13956	610	1366	13956
Q9H1B7	179	Q9H1B7	Interferon regulatory factor 2-binding protein-like	IRF2BPL	0.999998	56.6773	9.70125e-260	217.88	194.03	217.88	1	S	AVEQRSRFEYPPPPVSLGSSSHTARLPNGLG	X;X;X;X;X;X;X;X;X;X;X;X;X;X;X;GalT_UC1;X;X;X;X;X;X;X;X;X;X;X;X;X;X;X	XXXXXPPPPPPPPPPPPPPPPPPPPXXXXXX	FEYPPPPVS(1)LGSSSHTAR	FEYPPPPVS(56.68)LGS(-56.68)S(-76.42)S(-64.89)HT(-87.65)AR	9	4	0.11525	49720000	49720000	0	0	5.2339	478	354	179	179	127;498	156;611	251;252;936	613;614;615;616;2145	251	613	33252	251	613	33252	251	613	33252
Q9H4A3	1863	Q9H4A3	Serine/threonine-protein kinase WNK1	WNK1	1	91.812	5.3651e-18	91.812	69.911	91.812	1	S	TSSGAGVFKMGRFQVSVAADGAQKEGKNKSE	GalT_UC1;X;X;X;X;X;X;X;X;X;X;X;X;X;X;GalT_UC1;X;X;X;X;X;X;X;X;X;X;X;X;X;X;X	XXXXXXXXXXXXPPPPPPPPPPPPXXXXXXX	FQVS(1)VAADGAQK	FQVS(91.81)VAADGAQK	4	2	2.845	7694700	7694700	0	0	NaN	482	357	1863	1863	137	170	274;275	687;688	275	688	15398	275	688	15398	275	688	15398
Q9H4A3	1950	Q9H4A3	Serine/threonine-protein kinase WNK1	WNK1	0.911186	10.8839	9.77455e-13	106.91	87.077	106.91	1	T	SDTGQPTKVGRFQVTTTANKVGRFSVSKTED	X;X;X;X;X;X;X;X;X;X;X;X;X;X;X;GalT_UC1;X;X;X;X;X;X;X;X;X;X;X;X;X;X;X	XXXXXXXXXXXPPPPPPPPPXXXXXXXXXXX	FQVT(0.014)T(0.911)T(0.074)ANK	FQVT(-17.99)T(10.88)T(-10.88)ANK	5	3	0.25188	90717000	90717000	0	0	NaN	1049	357	1950	1950	138	171	276	689	276	689	8872	276	689	8872	276	689	8872
Q9H4A3	2382	Q9H4A3	Serine/threonine-protein kinase WNK1	WNK1	0.928738	11.1503	9.65497e-13	100.55	87.405	100.55	1	T	LQKSISNPPGSNLRTT_______________	X;X;X;X;X;X;X;X;X;X;X;X;X;X;X;GalT_UC1;X;X;X;X;X;X;X;X;X;X;X;X;X;X;X	XXXPPPPPPPPPPPPPXXXXXXXXXXXXXXX	SISNPPGSNLRT(0.071)T(0.929)	S(-74.84)IS(-89.08)NPPGS(-74.84)NLRT(-11.15)T(11.15)	13	3	-0.43385	17068000	17068000	0	0	NaN	1050	357	2382	2382	457	562	869	1979	869	1979	12649	869	1979	12649	869	1979	12649
Q9H4G0	794	Q9H4G0	Band 4.1-like protein 1	EPB41L1	0.993518	22.2011	0	245.96	227.6	245.96	1	S	EIRSLSPIIGKDVLTSTYGATAETLSTSTTT	X;X;X;X;X;X;X;X;X;X;X;X;X;X;X;GalT_UC1;X;X;X;X;X;X;X;X;X;X;X;X;X;X;X	XXXXXXXXXXXPPPPPPPPPPPPPPPPPPPP	DVLT(0.006)S(0.994)TYGATAETLSTSTTTHVTK	DVLT(-22.2)S(22.2)T(-33.01)YGAT(-129.83)AET(-172.18)LS(-198.16)T(-204.55)S(-212.66)T(-220.03)T(-220.03)T(-220.03)HVT(-230.57)K	5	4	-0.34738	87980000	87980000	0	0	11.898	483	358	794	794	93	117	192;193	479;480;481;482;483;484;485;486;487	193	483	48236	193	483	48236	193	483	48236
Q9H4I2	240	Q9H4I2	Zinc fingers and homeoboxes protein 3	ZHX3	0.992137	21.0147	1.0469e-214	195.6	180.1	195.6	1	S	VREGDHSFINGAVPVSQASASSAKNPHAANG	X;X;X;X;X;X;X;X;X;X;X;X;X;X;X;GalT_UC1;X;X;X;X;X;X;X;X;X;X;X;X;X;X;X	XXPPPPPPPPPPPPPPPPPPPPPPXXXXXXX	EGDHSFINGAVPVS(0.992)QAS(0.008)ASSAK	EGDHS(-95.94)FINGAVPVS(21.01)QAS(-21.01)AS(-50.87)S(-69.63)AK	14	4	-0.26029	72182000	72182000	0	0	5.7138	484	359	240	240	100	127	204	504;505	204	505	25958	204	505	25958	204	505	25958
Q9H4I2	735	Q9H4I2	Zinc fingers and homeoboxes protein 3	ZHX3	1	64.8363	0.0107879	64.836	40.809	64.836	1	T	RKVSPIKINLKNLRVTEANGRNEIPGLGACD	X;X;X;X;X;X;X;X;X;X;X;X;X;X;X;GalT_UC1;X;X;X;X;X;X;X;X;X;X;X;X;X;X;X	XXXXXXXXXXXXXXPPPPPPPXXXXXXXXXX	VT(1)EANGR	VT(64.84)EANGR	2	2	-0.17685	2999100	2999100	0	0	NaN	1053	359	735	735	702	870	1356	3214;3215;3216;3217;3218	1356	3218	2229	1356	3218	2229	1356	3218	2229
Q9H792	510	Q9H792	Pseudopodium-enriched atypical kinase 1	PEAK1	0.982594	18.7961	9.41918e-31	101.39	86.258	101.39	2	T	SPKTKSSSSTPNSPVTSSSLTPGQISAHFQK	X;X;X;X;X;X;X;X;X;X;X;X;X;X;X;GalT_UC1;GalT_UC1;X;X;X;X;X;X;X;X;X;X;X;X;X;X	XXXXXPPPPPPPPPPPPPPPPPPPPPPPPPP	SSSSTPNS(0.002)PVT(0.983)S(0.885)S(0.106)S(0.023)LTPGQISAHFQK	S(-51.33)S(-51.33)S(-51.33)S(-50.55)T(-43.14)PNS(-27.24)PVT(18.8)S(9.73)S(-9.73)S(-16.51)LT(-45.17)PGQIS(-45.52)AHFQK	11	4	1.1189	15558000	0	15558000	0	NaN	1055	360	510	510	514	634;635	971	2219;2220	971	2220	28142	971	2220	28142	971	2220	28142
Q9H792	511	Q9H792	Pseudopodium-enriched atypical kinase 1	PEAK1	0.885319	9.7289	9.41918e-31	101.39	86.258	101.39	2	S	PKTKSSSSTPNSPVTSSSLTPGQISAHFQKS	X;X;X;X;X;X;X;X;X;X;X;X;X;X;GalT_UC1;GalT_UC1;X;X;X;X;X;X;X;X;X;X;X;X;X;X;X	XXXXPPPPPPPPPPPPPPPPPPPPPPPPPPX	SSSSTPNS(0.002)PVT(0.983)S(0.885)S(0.106)S(0.023)LTPGQISAHFQK	S(-51.33)S(-51.33)S(-51.33)S(-50.55)T(-43.14)PNS(-27.24)PVT(18.8)S(9.73)S(-9.73)S(-16.51)LT(-45.17)PGQIS(-45.52)AHFQK	12	4	1.1189	15558000	0	15558000	0	NaN	489	360	511	511	514	634;635	971	2219;2220	971	2220	28142	971	2220	28142	971	2220	28142
Q9H7S9	259	Q9H7S9	Zinc finger protein 703	ZNF703	0.999996	53.7766	6.64073e-13	82.417	58.997	82.417	1	S	KKDQEPKPSPEPAAVSRGGGGEPGAHGGAES	X;X;X;X;X;X;X;X;X;X;X;X;X;X;X;GalT_UC1;X;X;X;X;X;X;X;X;X;X;X;X;X;X;X	XXPPPPPPPPPPPPPPPXXXXXXXXXXXXXX	DQEPKPSPEPAAVS(1)R	DQEPKPS(-53.78)PEPAAVS(53.78)R	14	3	-0.15145	0	0	0	0	NaN	490	361	259	259	87	110	177	452	177	452	8359	177	452	8359	177	452	8359
Q9HAU0	382	Q9HAU0	Pleckstrin homology domain-containing family A member 5	PLEKHA5	1	116.73	1.35538e-21	116.73	75.446	116.73	1	S	RPINLSSSENKIVNVSLADLRGGNRPNTGPL	X;X;X;X;X;X;X;X;X;X;X;X;X;X;X;GalT_UC1;X;X;X;X;X;X;X;X;X;X;X;X;X;X;X	XXXXXXXXXXXPPPPPPPPPPXXXXXXXXXX	IVNVS(1)LADLR	IVNVS(116.73)LADLR	5	3	-0.013419	94402000	94402000	0	0	NaN	491	362	382	382	237	291	467;468	1094;1095;1096	468	1095	36124	468	1095	36124	468	1095	36124
Q9HBD1	593	Q9HBD1	Roquin-2	RC3H2	1	217.883	9.70125e-260	217.88	198.59	217.88	1	S	KSSPFLTRVPVYPPHSENIQYFQDPRTQIPF	X;X;X;X;X;X;X;X;X;X;X;X;X;X;X;GalT_UC1;X;X;X;X;X;X;X;X;X;X;X;X;X;X;X	XXXXXXXXPPPPPPPPPPPPPPPPPPXXXXX	VPVYPPHS(1)ENIQYFQDPR	VPVYPPHS(217.88)ENIQYFQDPR	8	4	-0.42876	15135000	15135000	0	0	NaN	492	363	593	593	689	855	1337	3164;3165	1337	3164	38311	1337	3164	38311	1337	3164	38311
Q9HBM6	165	Q9HBM6	Transcription initiation factor TFIID subunit 9B	TAF9B	0.908957	10.6771	4.79832e-16	91.657	82.671	91.657	1	T	AVSSKPTTPTIATPQTVSVPNKVATPMSVTS	X;X;X;X;X;X;X;X;X;X;X;X;X;X;X;GalT_UC1;X;X;X;X;X;X;X;X;X;X;X;X;X;X;X	PPPPPPPPPPPPPPPPPPPPPPXXXXXXXXX	LSVGAVSSKPTTPTIAT(0.013)PQT(0.909)VS(0.078)VPNK	LS(-78.72)VGAVS(-67.65)S(-60.55)KPT(-52.83)T(-44.57)PT(-35.79)IAT(-18.45)PQT(10.68)VS(-10.68)VPNK	20	4	-0.49475	9081100	9081100	0	0	NaN	1059	364	165	165	300	365	575	1306	575	1306	42371	575	1306	42371	575	1306	42371
Q9HC35	869	Q9HC35	Echinoderm microtubule-associated protein-like 4	EML4	0.999997	55.1629	1.9777e-05	70.584	45.793	70.584	1	S	GKDMSIIQWKLVEKLSLPQNETVADTTLTKA	X;X;X;X;X;X;X;X;X;X;X;X;X;X;X;GalT_UC1;X;X;X;X;X;X;X;X;X;X;X;X;X;X;X	XXXXXXXXXXXXXXPPPPPPPPPPPPPPPPX	LS(1)LPQNETVADTTLTK	LS(55.16)LPQNET(-55.16)VADT(-68.26)T(-69.4)LT(-69.13)K	2	3	0.07111	7929300	7929300	0	0	NaN	495	366	869	869	297	362	572	1300	572	1300	39699	572	1300	39699	572	1300	39699
Q9HCD5	395	Q9HCD5	Nuclear receptor coactivator 5	NCOA5	0.858367	8.46753	0.0054495	59.418	41.872	59.418	1	S	DSLPGPISRQPLGATSGASLKTQPSSQPLQS	X;X;X;X;X;X;X;X;X;X;X;X;X;X;X;GalT_UC1;X;X;X;X;X;X;X;X;X;X;X;X;X;X;X	XXXXXXXXXPPPPPPPPPPPPXXXXXXXXXX	QPLGAT(0.122)S(0.858)GAS(0.019)LK	QPLGAT(-8.47)S(8.47)GAS(-16.44)LK	7	3	0.1236	9325700	9325700	0	0	NaN	496	367	395	395	416	504	772	1730	772	1730	9453	772	1730	9453	772	1730	9453
Q9HCD5	418	Q9HCD5	Nuclear receptor coactivator 5	NCOA5	0.757212	8.33679	1.66515e-39	109.26	98.987	109.26	1	T	PSSQPLQSGQVLPSATPTPSAPPTSQQELQA	X;X;X;X;X;X;X;X;X;X;X;X;X;X;X;GalT_UC1;X;X;X;X;X;X;X;X;X;X;X;X;X;X;X	PPPPPPPPPPPPPPPPPPPPPPPPPPPPPPP	TQPSSQPLQSGQVLPS(0.111)AT(0.757)PT(0.111)PS(0.009)APPT(0.009)S(0.001)QQELQAK	T(-71.92)QPS(-66.01)S(-59.78)QPLQS(-31.94)GQVLPS(-8.34)AT(8.34)PT(-8.34)PS(-19.04)APPT(-19.04)S(-27.6)QQELQAK	18	4	0.73609	95133000	95133000	0	0	NaN	1060	367	418	418	605	753	1193	2825	1193	2825	49880	1193	2825	49880	1193	2825	49880
Q9HDC9	162	Q9HDC9	Adipocyte plasma membrane-associated protein	APMAP	1	61.1103	2.97043e-128	171.92	157.09	61.11	1	T	PVCGRPLGIRAGPNGTLFVADAYKGLFEVNP	X;X;X;X;X;X;X;X;X;X;X;X;X;X;X;GalT_UC1;X;X;X;X;X;X;X;X;X;X;X;X;X;X;X	XXXXXXXXXXPPPPPPPPPPPPPPXXXXXXX	AGPNGT(1)LFVADAYK	AGPNGT(61.11)LFVADAYK	6	3	-0.0899	347860000	347860000	0	0	NaN	1063	369	162	162	10	12	18;19;20;21	49;50;51;52;53;54;55;56;57	21	57	34564	19	51	33923	19	51	33923
Q9NPF5	418	Q9NPF5	DNA methyltransferase 1-associated protein 1	DMAP1	0.808422	7.25573	8.0706e-10	72.035	61.492	72.035	1	S	VLGGPATPASGPGPASAEPAVTEPGLGPDPK	X;X;X;X;X;X;X;X;X;X;X;X;X;X;X;GalT_UC1;X;X;X;X;X;X;X;X;X;X;X;X;X;X;X	PPPPPPPPPPPPPPPPPPPPPPPPPPPPPPP	AGVLGGPAT(0.031)PAS(0.008)GPGPAS(0.808)AEPAVT(0.152)EPGLGPDPK	AGVLGGPAT(-14.13)PAS(-19.89)GPGPAS(7.26)AEPAVT(-7.26)EPGLGPDPK	18	3	0.42097	14649000	14649000	0	0	NaN	501	371	418	418	14	16	26	68	26	68	55953	26	68	55953	26	68	55953
Q9NPG3	989	Q9NPG3	Ubinuclein-1	UBN1	0.776878	6.35705	1.61252e-16	66.3	59.425	66.3		T	NGDSSGGTQGVAKLLTSPSLKPSAVSSVTSS	X;X;X;X;X;X;X;X;X;X;X;X;X;X;X;GalT_UC1;X;X;X;X;X;X;X;X;X;X;X;X;X;X;X	XXXXXXXXXXXXXPPPPPPPPPPPPPPPPPP	LLT(0.777)S(0.18)PS(0.043)LKPSAVSSVTSSTSLSK	LLT(6.36)S(-6.36)PS(-12.55)LKPS(-36.05)AVS(-48.51)S(-48.21)VT(-54.33)S(-59.94)S(-62.93)T(-63.96)S(-63.89)LS(-63.83)K	3	4	-0.34732	14569000	14569000	0	0	NaN	1064	372	989	989	281	346	553	1270	553	1270	39835	553	1270	39835	553	1270	39835
Q9NQX3	260	Q9NQX3	Gephyrin;Molybdopterin adenylyltransferase;Molybdopterin molybdenumtransferase	GPHN	0.995946	23.9251	0.000118055	74.392	60.487	74.392	1	T	PDSIISRGVQVLPRDTASLSTTPSESPRAQA	X;X;X;X;X;X;X;X;X;X;X;X;X;X;X;GalT_UC1;X;X;X;X;X;X;X;X;X;X;X;X;X;X;X	XXXXXXXXXXXXXXPPPPPPPPPPPPPPXXX	DT(0.996)AS(0.004)LSTTPSESPR	DT(23.93)AS(-23.93)LS(-48.16)T(-53.39)T(-65.79)PS(-65.79)ES(-71.2)PR	2	3	-0.095707	6993700	6993700	0	0	NaN	1065	373	260	260	92	116	191	478	191	478	13163	191	478	13163	191	478	13163
Q9NR12	89	Q9NR12	PDZ and LIM domain protein 7	PDLIM7	1	41.4482	2.50124e-20	115.71	90.241	41.448	1	S	GERLSLGLSRAQPVQSKPQKASAPAADPPRY	X;X;X;X;X;X;X;X;X;X;X;X;X;X;X;GalT_UC1;X;X;X;X;X;X;X;X;X;X;X;X;X;X;X	XXXXXXXXXXPPPPPPPPPPXXXXXXXXXXX	AQPVQS(1)KPQK	AQPVQS(41.45)KPQK	6	3	0.3405	705720000	705720000	0	0	NaN	502	374	89	89	36;37	45;46	67;68;69;70;71;72;73;74;75;76;77;78	203;204;205;206;207;208;209;210;211;212;213;214;215;216;217;218;219;220;221;222;223;224;225;226;227;228	78	228	6242	68	211	4468	68	211	4468
Q9NR12	105	Q9NR12	PDZ and LIM domain protein 7	PDLIM7	1	83.4076	1.72012e-21	112.75	98.329	112.75	1	T	KPQKASAPAADPPRYTFAPSVSLNKTARPFG	X;X;X;X;X;X;X;X;X;X;X;X;X;X;X;GalT_UC1;X;X;X;X;X;X;X;X;X;X;X;X;X;X;X	XXXXXXXXXXXXXXPPPPPPPPPPPXXXXXX	YT(1)FAPSVSLNK	YT(83.41)FAPS(-83.41)VS(-100.53)LNK	2	3	0.3266	11701000	11701000	0	0	NaN	1067	374	105	105	727	900	1397	3308	1397	3308	31724	1397	3308	31724	1397	3308	31724
Q9NR12	196	Q9NR12	PDZ and LIM domain protein 7	PDLIM7	1	83.5715	0	312.53	294.8	312.53	1	T	DPDEEHLKKSSQVPRTEAPAPASSTPQEPWP	X;X;X;X;X;X;X;X;X;X;X;X;X;X;X;GalT_UC1;X;X;X;X;X;X;X;X;X;X;X;X;X;X;X	XXXXXXXXXXXXXXXPPPPPPPPPPPPPPPP	T(1)EAPAPASSTPQEPWPGPTAPSPTSRPPWAVDPAFAER	T(83.57)EAPAPAS(-83.57)S(-105.97)T(-127.65)PQEPWPGPT(-206.43)APS(-232.19)PT(-232.19)S(-248)RPPWAVDPAFAER	1	4	-0.13085	502020000	502020000	0	0	NaN	1066	374	196	196	559	694	1102;1103;1104	2553;2554;2555;2556;2557;2558;2559;2560;2561;2562;2563;2564	1102	2556	74155	1102	2556	74155	1102	2556	74155
Q9NTZ6	121	Q9NTZ6	RNA-binding protein 12	RBM12	0.8657	7.4239	2.43527e-32	84.035	73.197	84.035	2	T	GPPPSSGMSSRVNLPTTVSNFNNPSPSVVTA	X;X;X;X;X;X;X;X;X;X;X;X;X;X;X;GalT_UC1;GalT_UC1;X;X;X;X;X;X;X;X;X;X;X;X;X;X	XXXXXXXXXXXPPPPPPPPPPPPPPPPPPPP	VNLPT(0.866)T(0.866)VS(0.266)NFNNPS(0.002)PSVVTATTSVHESNK	VNLPT(7.42)T(7.42)VS(-7.42)NFNNPS(-28.88)PS(-32.71)VVT(-52.11)AT(-60.29)T(-60.29)S(-68.01)VHES(-73.45)NK	5	4	0.38988	159920000	0	159920000	0	NaN	1068	375	121	121	674	839;840	1314;1317;1319	3118;3119;3124;3127;3128	1314	3118	38337	1314	3118	38337	1314	3118	38337
Q9NTZ6	122	Q9NTZ6	RNA-binding protein 12	RBM12	0.929464	11.2029	0	265.64	253.32	265.64	2	T	PPPSSGMSSRVNLPTTVSNFNNPSPSVVTAT	X;X;X;X;X;X;X;X;X;X;X;X;X;X;GalT_UC1;GalT_UC1;X;X;X;X;X;X;X;X;X;GalT_UC1;X;X;GalT_UC1;X;X	XXXXXXXXXXPPPPPPPPPPPPPPPPPPPPP	VNLPT(0.07)T(0.929)VSNFNNPS(0.003)PS(0.497)VVT(0.497)AT(0.003)TSVHESNK	VNLPT(-11.2)T(11.2)VS(-43.79)NFNNPS(-22.24)PS(0)VVT(0)AT(-22.24)T(-33.1)S(-54.31)VHES(-104.18)NK	6	5	0.077717	1223200000	0	1223200000	0	NaN	1069	375	122	122	674	839;840	1313;1314;1316;1317;1319	3117;3118;3119;3122;3123;3124;3127;3128	1316	3123	39481	1316	3123	39481	1316	3123	39481
Q9NTZ6	124	Q9NTZ6	RNA-binding protein 12	RBM12	0.803417	9.16469	3.15218e-28	77.925	69.105	77.925	1;2	S	PSSGMSSRVNLPTTVSNFNNPSPSVVTATTS	X;X;X;X;X;X;X;X;X;X;X;X;X;X;X;GalT_UC1;X;X;X;X;X;X;X;X;X;X;X;X;X;X;X	XXXXXXXXPPPPPPPPPPPPPPPPPPPPPPP	VNLPT(0.097)T(0.097)VS(0.803)NFNNPS(0.002)PSVVTATTSVHESNK	VNLPT(-9.16)T(-9.16)VS(9.16)NFNNPS(-27.17)PS(-34.86)VVT(-47.57)AT(-56.61)T(-62.11)S(-62.64)VHES(-71.64)NK	8	3	-0.53621	138340000	22659000	115680000	0	NaN	503	375	124	124	674	839;840	1317;1319;1321	3124;3127;3128;3130;3131	1321	3130	39563	1321	3130	39563	1321	3130	39563
Q9NTZ6	135	Q9NTZ6	RNA-binding protein 12	RBM12	0.794655	9.51324	0	265.64	253.32	78.661	2	T	PTTVSNFNNPSPSVVTATTSVHESNKNIQTF	X;X;GalT_UC1;X;X;X;X;X;X;X;X;X;GalT_UC1;X;X;GalT_UC1;X;X;X;X;X;X;X;X;X;X;X;X;X;X;X	PPPPPPPPPPPPPPPPPPPPPPPPPPXXXXX	VNLPT(0.093)T(0.814)VS(0.093)NFNNPS(0.091)PS(0.091)VVT(0.795)AT(0.011)T(0.011)S(0.002)VHESNK	VNLPT(-9.51)T(9.51)VS(-9.51)NFNNPS(-9.51)PS(-9.51)VVT(9.51)AT(-18.63)T(-18.63)S(-27.31)VHES(-43.27)NK	19	5	0.24105	49075000	0	49075000	0	NaN	1070	375	135	135	674	839;840	1313	3117	1313	3117	38248	1316	3123	39481	1316	3123	39481
Q9NTZ6	137	Q9NTZ6	RNA-binding protein 12	RBM12	0.762036	10.0258	5.97255e-124	157.91	147.96	147.64	2	T	TVSNFNNPSPSVVTATTSVHESNKNIQTFST	X;X;X;X;X;X;X;X;X;X;X;X;X;X;X;GalT_UC1;X;GalT_UC1;X;X;X;X;X;X;X;X;X;X;X;X;X	PPPPPPPPPPPPPPPPPPPPPPPPXXXXXXX	VNLPTTVSNFNNPS(0.005)PS(0.087)VVT(0.08)AT(0.762)T(0.088)S(0.977)VHESNK	VNLPT(-84.86)T(-70.75)VS(-70.75)NFNNPS(-22.6)PS(-10.03)VVT(-10.03)AT(10.03)T(-10.03)S(19.8)VHES(-38.6)NK	21	5	-0.50801	130960000	0	130960000	0	NaN	1071	375	137	137	674	839;840	1318	3125;3126	1318	3126	41679	1322	3135	50156	1322	3135	50156
Q9NTZ6	139	Q9NTZ6	RNA-binding protein 12	RBM12	0.976905	19.8049	1.71352e-104	147.64	133.37	147.64	2	S	SNFNNPSPSVVTATTSVHESNKNIQTFSTAS	X;X;X;X;X;X;X;X;X;X;X;X;X;GalT_UC1;X;GalT_UC1;X;X;X;X;X;X;X;X;X;X;X;X;X;X;X	PPPPPPPPPPPPPPPPPPPPPPXXXXXXXXX	VNLPTTVSNFNNPS(0.005)PS(0.087)VVT(0.08)AT(0.762)T(0.088)S(0.977)VHESNK	VNLPT(-84.86)T(-70.75)VS(-70.75)NFNNPS(-22.6)PS(-10.03)VVT(-10.03)AT(10.03)T(-10.03)S(19.8)VHES(-38.6)NK	23	5	-0.50801	130960000	0	130960000	0	NaN	506	375	139	139	674	839;840	1318	3125;3126	1318	3126	41679	1318	3126	41679	1318	3126	41679
Q9NXV6	349	Q9NXV6	CDKN2A-interacting protein	CDKN2AIP	0.951698	13.1918	3.28909e-16	101.11	86.544	101.11	1	S	AKNSSSSGTSLLTPKSSSSTNTSLLTSKSTS	X;X;X;X;X;X;X;X;X;X;X;X;X;X;X;GalT_UC1;X;X;X;X;X;X;X;X;X;X;X;X;X;X;X	XXXXXXXXXXXXXXXPPPPPPPPPPPPPXXX	S(0.952)S(0.046)S(0.002)STNTSLLTSK	S(13.19)S(-13.19)S(-25.81)S(-37.82)T(-49.18)NT(-74.32)S(-86.18)LLT(-97.46)S(-98.24)K	1	2	0.083172	191020000	191020000	0	0	3.203	507	376	349	349	513	632	969	2217	969	2217	8573	969	2217	8573	969	2217	8573
Q9NYV4	592	Q9NYV4	Cyclin-dependent kinase 12	CDK12	0.999951	43.1608	0	247.99	234.58	247.99	1;2;3	T	PASSTSTLPPSTHSKTSAVSSQANSQPPVQV	X;X;X;X;X;X;X;X;X;X;X;X;X;X;X;GalT_UC1;GalT_UC1;X;X;X;GalT_UC1;X;X;X;X;X;X;X;X;X;X	XXXXXXXXXXXXXXXPPPPPPPPPPPPPPPP	T(1)S(0.999)AVS(0.001)SQANSQPPVQVSVK	T(43.16)S(32.74)AVS(-32.74)S(-53.34)QANS(-136.64)QPPVQVS(-219)VK	1	4	0.1744	730750000	397470000	309890000	23400000	NaN	1074	378	592	592	613	763;764;765	1209;1210;1211;1213	2852;2853;2854;2855;2856;2857;2858;2860;2861;2862;2863	1210	2856	14315	1210	2856	14315	1210	2856	14315
Q9NYV4	593	Q9NYV4	Cyclin-dependent kinase 12	CDK12	0.999463	32.7384	0	247.99	234.58	247.99	1;2;3	S	ASSTSTLPPSTHSKTSAVSSQANSQPPVQVS	X;X;X;X;X;X;X;X;X;X;X;X;X;X;GalT_UC1;GalT_UC1;X;X;X;GalT_UC1;X;X;X;X;X;X;X;X;X;X;X	XXXXXXXXXXXXXXPPPPPPPPPPPPPPPPP	T(1)S(0.999)AVS(0.001)SQANSQPPVQVSVK	T(43.16)S(32.74)AVS(-32.74)S(-53.34)QANS(-136.64)QPPVQVS(-219)VK	2	4	0.1744	730750000	397470000	309890000	23400000	NaN	510	378	593	593	613	763;764;765	1209;1210;1211;1213	2852;2853;2854;2855;2856;2857;2858;2860;2861;2862;2863	1210	2856	14315	1210	2856	14315	1210	2856	14315
Q9NYV4	597	Q9NYV4	Cyclin-dependent kinase 12	CDK12	0.910678	10.0472	5.06457e-09	82.543	70.9	82.543	3	S	STLPPSTHSKTSAVSSQANSQPPVQVSVKTQ	X;X;X;X;X;X;X;X;X;X;GalT_UC1;GalT_UC1;X;X;X;GalT_UC1;X;X;X;X;X;X;X;X;X;X;X;X;X;X;X	XXXXXXXXXXPPPPPPPPPPPPPPPPPPPXX	T(0.996)S(0.996)AVS(0.098)S(0.911)QANSQPPVQVSVK	T(23.36)S(23.36)AVS(-10.05)S(10.05)QANS(-42.03)QPPVQVS(-53.05)VK	6	5	0.14617	23400000	0	0	23400000	NaN	511	378	597	597	613	763;764;765	1209	2852	1209	2852	10706	1209	2852	10706	1209	2852	10706
Q9NYV4	1447	Q9NYV4	Cyclin-dependent kinase 12	CDK12	0.791625	5.79907	0	224.49	118.5	224.49	1	T	HAETKLQNYGELGPGTTGASSSGAGLHWGGP	X;X;X;X;X;X;X;X;X;X;X;X;X;X;X;GalT_UC1;X;X;X;X;X;X;X;X;X;X;X;X;X;X;X	XXXXXPPPPPPPPPPPPPPPPPPPPPPPPPP	LQNYGELGPGT(0.792)T(0.208)GASSSGAGLHWGGPTQSSAYGK	LQNYGELGPGT(5.8)T(-5.8)GAS(-39.04)S(-48.39)S(-57.57)GAGLHWGGPT(-139.51)QS(-153.95)S(-173.63)AYGK	11	4	0.99328	54339000	54339000	0	0	NaN	1073	378	1447	1447	292	357	566	1292;1293	566	1293	45623	566	1293	45623	566	1293	45623
Q9NZM3	210	Q9NZM3	Intersectin-2	ITSN2	0.774608	5.38826	0	231.06	214.29	231.06	1	S	LMMGGFGGASIQKAQSLIDLGSSSSTSSTAS	X;X;X;X;X;X;X;X;X;X;X;X;X;X;X;GalT_UC1;X;X;X;X;X;X;X;X;X;X;X;X;X;X;X	XXXXXXXXXXXXXPPPPPPPPPPPPPPPPPP	AQS(0.775)LIDLGS(0.224)S(0.001)SSTSSTASLSGNSPK	AQS(5.39)LIDLGS(-5.39)S(-27.47)S(-59.08)S(-87.07)T(-112.55)S(-136.11)S(-157.62)T(-157.62)AS(-188.45)LS(-198.7)GNS(-219.21)PK	3	3	0.13433	50610000	50610000	0	0	NaN	512	381	210	210	38	47	79	229;230;231	79	230	40191	79	230	40191	79	230	40191
Q9NZM4	270	Q9NZM4	Glioma tumor suppressor candidate region gene 1 protein	GLTSCR1	0.764032	5.47741	1.52519e-30	77.825	73.904	77.825	1	S	KQVPVSGYLASAAGPSEPVTLASAGVSPQGA	X;X;X;X;X;X;X;X;X;X;X;X;X;X;X;GalT_UC1;X;X;X;X;X;X;X;X;X;X;X;X;X;X;X	XPPPPPPPPPPPPPPPPPPPPPPPPPPPPPP	QVPVSGYLAS(0.002)AAGPS(0.764)EPVT(0.216)LAS(0.016)AGVS(0.002)PQGAGLVIQK	QVPVS(-37.68)GYLAS(-25.67)AAGPS(5.48)EPVT(-5.48)LAS(-16.85)AGVS(-26.94)PQGAGLVIQK	15	4	-0.093301	8763500	8763500	0	0	NaN	513	382	270	270	426	517	790	1783	790	1783	77791	790	1783	77791	790	1783	77791
Q9NZM4	1260	Q9NZM4	Glioma tumor suppressor candidate region gene 1 protein	GLTSCR1	0.999901	40.4406	7.18258e-62	139.98	113.2	139.98	1	T	KLVIRHGGAGGSPSVTWARASSSLSSSSSSS	X;X;X;X;X;X;X;X;X;X;X;X;X;X;X;GalT_UC1;X;X;X;X;X;X;X;X;X;X;X;X;X;X;X	XXXXXPPPPPPPPPPPPPPXXXXXXXXXXXX	HGGAGGSPSVT(1)WAR	HGGAGGS(-50.62)PS(-40.44)VT(40.44)WAR	11	3	0.19435	10457000	10457000	0	0	NaN	1077	382	1260	1260	187	229	362	852	362	852	8781	362	852	8781	362	852	8781
Q9P219	1519	Q9P219	Protein Daple	CCDC88C	0.814007	11.1825	2.34824e-117	164.88	133.01	164.88	1	T	TDLAMRSWPSELGSRTCSTSATTTAPSNSTP	X;X;X;X;X;X;X;X;X;X;X;X;X;X;X;GalT_UC1;X;X;X;X;X;X;X;X;X;X;X;X;X;X;X	XXXXXXXXXXXXXXXPPPPPPPPPPPPPPPP	T(0.814)CS(0.062)T(0.062)S(0.062)ATTTAPSNSTPIAR	T(11.18)CS(-11.18)T(-11.18)S(-11.18)AT(-68.64)T(-93.53)T(-115.54)APS(-134.29)NS(-152.97)T(-152.97)PIAR	1	3	0.30366	23315000	23315000	0	0	NaN	1083	384	1519	1519	552	685	1091	2529;2530	1091	2530	10781	1091	2530	10781	1091	2530	10781
Q9P2N6	719	Q9P2N6	KAT8 regulatory NSL complex subunit 3	KANSL3	0.880667	9.10498	1.983e-124	157.47	138.08	157.47	2	S	EGGVSASPVPSVVSSSTAPSALHTLQSRLVA	X;X;X;X;X;X;X;X;X;X;X;X;X;X;X;GalT_UC1;GalT_UC1;X;X;X;X;X;X;X;X;X;X;X;X;X;X	PPPPPPPPPPPPPPPPPPPPPPPPPPPPXXX	SSSSEGGVSASPVPSVVS(0.001)S(0.028)S(0.881)T(0.972)APS(0.119)ALHTLQSR	S(-119.4)S(-114.54)S(-109.44)S(-104.1)EGGVS(-80.56)AS(-60.74)PVPS(-59.3)VVS(-35.17)S(-18)S(9.1)T(18)APS(-9.1)ALHT(-43.99)LQS(-43.99)R	20	5	0.20655	28573000	0	28573000	0	NaN	518	386	719	719	512	630;631	967	2215	967	2215	35833	967	2215	35833	967	2215	35833
Q9P2N6	720	Q9P2N6	KAT8 regulatory NSL complex subunit 3	KANSL3	0.97203	18.0045	1.983e-124	157.47	138.08	157.47	2	T	GGVSASPVPSVVSSSTAPSALHTLQSRLVAT	X;X;X;X;X;X;X;X;X;X;X;X;X;X;GalT_UC1;GalT_UC1;X;X;X;X;X;X;X;X;X;X;X;X;X;X;X	PPPPPPPPPPPPPPPPPPPPPPPPPPPXXXX	SSSSEGGVSASPVPSVVS(0.001)S(0.028)S(0.881)T(0.972)APS(0.119)ALHTLQSR	S(-119.4)S(-114.54)S(-109.44)S(-104.1)EGGVS(-80.56)AS(-60.74)PVPS(-59.3)VVS(-35.17)S(-18)S(9.1)T(18)APS(-9.1)ALHT(-43.99)LQS(-43.99)R	21	5	0.20655	28573000	0	28573000	0	NaN	1087	386	720	720	512	630;631	967	2215	967	2215	35833	967	2215	35833	967	2215	35833
Q9P2N6	796	Q9P2N6	KAT8 regulatory NSL complex subunit 3	KANSL3	0.99802	25.9237	1.18751e-62	131.24	107.68	131.24	2	T	TSVKLPTPMQSLGAITTGTSTIVRTIPVATT	X;X;X;X;X;X;X;X;X;X;X;X;X;X;X;GalT_UC1;GalT_UC1;X;X;X;X;X;X;X;X;X;X;X;X;X;X	XXXXPPPPPPPPPPPPPPPPPPPPXXXXXXX	LPTPMQSLGAIT(0.998)T(0.664)GT(0.307)S(0.022)T(0.009)IVR	LPT(-66.73)PMQS(-39.58)LGAIT(25.92)T(3.36)GT(-3.36)S(-14.81)T(-18.73)IVR	12	4	0.31603	7964500	0	7964500	0	NaN	1085	386	796	796	289	354	562	1281	562	1281	49820	562	1281	49820	562	1281	49820
Q9P2N6	859	Q9P2N6	KAT8 regulatory NSL complex subunit 3	KANSL3	0.961153	13.9343	3.89891e-65	147.51	126.73	147.51	1	T	GLAQISNQASGLKVPTTITLTLRGQPSRITT	X;X;X;X;X;X;X;X;X;X;X;X;X;X;X;GalT_UC1;X;X;X;X;X;X;X;X;X;X;X;X;X;X;X	XXXXXXXXXXXXXPPPPPPPPPPXXXXXXXX	VPT(0.961)T(0.039)ITLTLR	VPT(13.93)T(-13.93)IT(-64.76)LT(-97.15)LR	3	3	0.44223	143580000	143580000	0	0	NaN	1088	386	859	859	686	852	1334	3157	1334	3157	34904	1334	3157	34904	1334	3157	34904
Q9P2R6	1238	Q9P2R6	Arginine-glutamic acid dipeptide repeats protein	RERE	0.890728	9.34701	3.10381e-201	187.56	173.94	187.56	1	T	SGPGHMRPSFEPPPTTIAAVPPYIGPDTPAL	X;X;X;X;X;X;X;X;X;X;X;X;X;X;X;GalT_UC1;X;X;X;X;X;X;X;X;X;X;X;X;X;X;X	XXXXXXXPPPPPPPPPPPPPPPPPPPPPPPP	PS(0.006)FEPPPT(0.104)T(0.891)IAAVPPYIGPDTPALR	PS(-21.9)FEPPPT(-9.35)T(9.35)IAAVPPYIGPDT(-133.34)PALR	9	4	0.35574	156940000	156940000	0	0	NaN	1089	387	1238	1238	376	458	712;713	1604;1605;1606;1607;1608;1609;1610;1611;1612;1613;1614	712	1607	78524	712	1607	78524	712	1607	78524
Q9UBV2	610	Q9UBV2	Protein sel-1 homolog 1	SEL1L	0.999888	39.5153	4.17298e-25	111.86	90.322	111.86	1	T	FILDQREASIVGENETYPRALLHWNRAASQG	X;X;X;X;X;X;X;X;X;X;X;X;X;X;X;GalT_UC1;X;X;X;X;X;X;X;X;X;X;X;X;X;X;X	XXXXXXPPPPPPPPPPPPPXXXXXXXXXXXX	EASIVGENET(1)YPR	EAS(-39.52)IVGENET(39.52)YPR	10	3	-0.34956	14031000	14031000	0	0	NaN	1090	388	610	610	96	121	198	494;495	198	495	18420	198	495	18420	198	495	18420
Q9UGU0	240	Q9UGU0	Transcription factor 20	TCF20	0.870363	11.7159	0	260.25	208.33	260.25	1	S	QLRVGQFGQHYQSSASSSSSSSFPSPQRFSQ	X;X;X;X;X;X;X;X;X;X;X;X;X;X;X;GalT_UC1;X;X;X;X;X;X;X;X;X;X;X;X;X;X;X	XXXPPPPPPPPPPPPPPPPPPPPPPPPPXXX	VGQFGQHYQS(0.004)S(0.059)AS(0.87)S(0.004)S(0.059)S(0.004)SSSFPSPQR	VGQFGQHYQS(-23.24)S(-11.72)AS(11.72)S(-23.24)S(-11.72)S(-23.24)S(-56.66)S(-77.94)S(-98.4)FPS(-146.86)PQR	13	4	0.15468	33120000	33120000	0	0	NaN	519	389	240	240	660	820	1285	3028;3029;3030;3031;3032;3033;3034	1285	3031	19518	1285	3031	19518	1285	3031	19518
Q9UH99	634	Q9UH99	SUN domain-containing protein 2	SUN2	0.999894	40.2811	2.69438e-18	105.46	50.413	105.46	1	S	IRPTAVTLEHVPKALSPNSTISSAPKDFAIF	X;X;X;X;X;X;X;X;X;X;X;X;X;X;X;GalT_UC1;X;X;X;X;X;X;X;X;X;X;X;X;X;X;X	XXXXXXXXXXXXXPPPPPPPPPPPPPXXXXX	ALS(1)PNSTISSAPK	ALS(40.28)PNS(-40.28)T(-49.26)IS(-64.74)S(-64.74)APK	3	3	-0.15248	26209000	26209000	0	0	NaN	520	390	634	634	19	21	33	87;88;89;90	33	88	12010	33	88	12010	33	88	12010
Q9UHD9	113	Q9UHD9	Ubiquilin-2	UBQLN2	0.863029	10.6777	2.40737e-179	185.27	167.51	185.27	2	T	VHLVIKSQNRPQGQSTQPSNAAGTNTTSAST	X;X;X;X;X;X;X;X;X;X;X;X;X;X;X;GalT_UC1;X;X;X;X;X;X;X;X;X;GalT_UC1;X;X;X;X;X	XXXXXXPPPPPPPPPPPPPPPPPPPPPPPPP	SQNRPQGQS(0.068)T(0.863)QPS(0.068)NAAGTNT(0.341)T(0.341)S(0.319)ASTPR	S(-78.67)QNRPQGQS(-10.68)T(10.68)QPS(-10.68)NAAGT(-41.3)NT(0)T(0)S(-0.15)AS(-45.67)T(-47.75)PR	10	4	-0.58505	251220000	0	251220000	0	NaN	1091	391	113	113	491	600;601	920	2112	920	2112	7116	920	2112	7116	920	2112	7116
Q9UHR5	236	Q9UHR5	SAP30-binding protein	SAP30BP	0.851406	10.809	0	223.76	203.37	223.76	1	T	IEFVTGTKKGTTTNATSTTTTTASTAVADAQ	X;X;X;X;X;X;X;X;X;X;GalT_UC1;X;X;X;X;GalT_UC1;X;X;X;X;X;X;X;X;X;X;X;X;X;X;X	XXXXXXXXPPPPPPPPPPPPPPPPPPPPPPP	KGT(0.001)T(0.006)T(0.071)NAT(0.851)S(0.071)T(0.001)TTTTASTAVADAQK	KGT(-31.83)T(-21.42)T(-10.81)NAT(10.81)S(-10.81)T(-31.83)T(-61.85)T(-71.45)T(-98.92)T(-98.92)AS(-140.1)T(-147.59)AVADAQK	8	3	0.45378	25123000	25123000	0	0	4.6406	1097	392	236	236	179;245	219;220;300;301	485	1131;1132	485	1132	9058	485	1132	9058	485	1132	9058
Q9UHR5	237	Q9UHR5	SAP30-binding protein	SAP30BP	0.77547	10.1915	5.16516e-178	181.72	130.07	107.61	2	S	EFVTGTKKGTTTNATSTTTTTASTAVADAQK	X;X;X;X;X;X;X;X;X;GalT_UC1;X;X;X;X;X;GalT_UC1;X;X;X;X;X;X;X;X;X;X;X;X;X;X;X	XXXXXXXPPPPPPPPPPPPPPPPPPPPPPPP	KGT(0.48)T(0.48)T(0.114)NAT(0.075)S(0.775)T(0.074)T(0.001)TTTASTAVADAQK	KGT(0)T(0)T(-10.19)NAT(-10.19)S(10.19)T(-10.19)T(-29.54)T(-38.66)T(-38.66)T(-47.4)AS(-63.6)T(-63.6)AVADAQK	9	3	-0.046503	46115000	0	46115000	0	8.5182	522	392	237	237	179;245	219;220;300;301	482	1124	482	1124	7374	484	1128	8934	484	1128	8934
Q9UHR5	239	Q9UHR5	SAP30-binding protein	SAP30BP	0.901535	10.1672	1.9358e-137	167.28	144.67	167.28	1	T	VTGTKKGTTTNATSTTTTTASTAVADAQKRK	X;X;X;X;X;X;X;X;X;X;X;X;X;X;X;GalT_UC1;X;X;X;X;X;X;X;X;X;X;X;X;X;X;X	XXXXXPPPPPPPPPPPPPPPPPPPPPPPPXX	KGTTTNAT(0.001)S(0.009)T(0.087)T(0.902)T(0.002)TTASTAVADAQK	KGT(-57.56)T(-48.56)T(-39.31)NAT(-29.83)S(-20.11)T(-10.17)T(10.17)T(-27.18)T(-38.32)T(-48.56)AS(-69.86)T(-69.86)AVADAQK	11	3	-0.18619	37124000	37124000	0	0	6.8573	1099	392	239	239	179;245	219;220;300;301	483	1125;1126	483	1126	8038	483	1126	8038	483	1126	8038
Q9UHY1	532	Q9UHY1	Nuclear receptor-binding protein	NRBP1	0.935825	11.9423	1.28868e-12	94.692	82.478	94.692	1	T	KFNFARNSTLNSAAVTVSS____________	X;X;X;X;X;X;X;X;X;X;X;X;X;X;X;GalT_UC1;X;X;X;X;X;X;X;X;X;X;X;X;X;X;X	XXXXXXPPPPPPPPPPPPPXXXXXXXXXXXX	NSTLNSAAVT(0.936)VS(0.06)S(0.004)	NS(-74.3)T(-67.91)LNS(-53.98)AAVT(11.94)VS(-11.94)S(-23.34)	10	2	0.20013	130380000	130380000	0	0	NaN	1100	393	532	532	343	421	658	1465;1466	658	1465	20570	658	1465	20570	658	1465	20570
Q9UIU6	426	Q9UIU6	Homeobox protein SIX4	SIX4	0.897233	9.52245	4.68944e-106	151.94	143.45	151.94	2	S	LGSTSQDVKEFKVLQSSANSATTTSYSPSVP	X;X;X;X;X;X;X;X;X;X;X;X;X;X;X;GalT_UC1;X;X;X;X;X;X;X;X;X;X;GalT_UC1;X;X;X;X	XXXXXXXXXXXXPPPPPPPPPPPPPPPPPPP	VLQS(0.897)S(0.101)ANS(0.002)ATTT(0.011)S(0.09)YS(0.799)PS(0.09)VPVS(0.011)FPGLIPSTEVK	VLQS(9.52)S(-9.52)ANS(-27.94)AT(-51.75)T(-36.83)T(-18.84)S(-9.52)YS(9.52)PS(-9.52)VPVS(-18.84)FPGLIPS(-90.76)T(-98.32)EVK	4	4	0.060929	202000000	0	202000000	0	NaN	525	394	426	426	666	828;829	1294	3057;3058;3059;3060	1294	3058	67401	1294	3058	67401	1294	3058	67401
Q9UIU6	437	Q9UIU6	Homeobox protein SIX4	SIX4	0.799329	9.52245	4.68944e-106	151.94	143.45	151.94	2	S	KVLQSSANSATTTSYSPSVPVSFPGLIPSTE	X;X;X;X;GalT_UC1;X;X;X;X;X;X;X;X;X;X;GalT_UC1;X;X;X;X;X;X;X;X;X;X;X;X;X;X;X	XPPPPPPPPPPPPPPPPPPPPPPPPPPPPPP	VLQS(0.897)S(0.101)ANS(0.002)ATTT(0.011)S(0.09)YS(0.799)PS(0.09)VPVS(0.011)FPGLIPSTEVK	VLQS(9.52)S(-9.52)ANS(-27.94)AT(-51.75)T(-36.83)T(-18.84)S(-9.52)YS(9.52)PS(-9.52)VPVS(-18.84)FPGLIPS(-90.76)T(-98.32)EVK	15	4	0.060929	202000000	0	202000000	0	NaN	526	394	437	437	666	828;829	1294	3057;3058;3059;3060	1294	3058	67401	1294	3058	67401	1294	3058	67401
Q9UJX2	565	Q9UJX2	Cell division cycle protein 23 homolog	CDC23	0.971476	15.5055	2.34378e-42	109.85	99.732	95.195	1	T	LRQILQLRNQGETPTTEVPAPFFLPASLSAN	X;X;X;X;X;X;X;X;X;X;X;X;X;X;X;GalT_UC1;X;X;X;X;X;X;X;X;X;X;X;X;X;X;X	XXXXXXXXPPPPPPPPPPPPPPPPPPPPPPP	NQGET(0.001)PT(0.027)T(0.971)EVPAPFFLPASLSANNTPTR	NQGET(-29.99)PT(-15.51)T(15.51)EVPAPFFLPAS(-36.82)LS(-55.3)ANNT(-75.81)PT(-75.81)R	8	4	0.56234	6146300	6146300	0	0	NaN	1105	396	565	565	339	417	651	1450;1451	651	1451	77694	652	1453	77764	652	1453	77764
Q9UK61	1124	Q9UK61	Protein FAM208A	FAM208A	0.999263	31.3774	6.44446e-34	122.69	102.85	122.69	1	S	AKIASNPLERHVIPVSSSDFNNKHLLEPLCS	X;X;X;X;X;X;X;X;X;X;X;X;X;X;X;GalT_UC1;X;X;X;X;X;X;X;X;X;X;X;X;X;X;X	XXXXXXXXXXPPPPPPPPPPPPPXXXXXXXX	HVIPVS(0.999)S(0.001)SDFNNK	HVIPVS(31.38)S(-31.38)S(-50.35)DFNNK	6	3	0.051246	24335000	24335000	0	0	NaN	527	397	1124	1124	198	241	378	892	378	892	13299	378	892	13299	378	892	13299
Q9UKD1	403	Q9UKD1	Glucocorticoid modulatory element-binding protein 2	GMEB2	0.990222	20.0552	4.46174e-18	106.4	89.768	106.4	1	S	VPVPQLTSVPLGKVVSTLPSTVLGKGSLQAP	X;X;X;X;X;X;X;X;X;X;X;X;X;X;X;GalT_UC1;X;X;X;X;X;X;X;X;X;X;X;X;X;X;X	XXXXXXXXXXXXXPPPPPPPPPPPPXXXXXX	VVS(0.99)T(0.01)LPSTVLGK	VVS(20.06)T(-20.06)LPS(-62.89)T(-68.79)VLGK	3	3	-0.2341	148170000	148170000	0	0	NaN	528	398	403	403	715	886	1379	3275;3276;3277	1379	3276	27674	1379	3276	27674	1379	3276	27674
Q9UKE5	568	Q9UKE5	TRAF2 and NCK-interacting protein kinase	TNIK	0.999881	39.2597	1.20025e-33	119.27	99.265	119.27	1	S	HKVANRISDPNLPPRSESFSISGVQPARTPP	X;X;X;X;X;X;X;X;X;X;X;X;X;X;X;GalT_UC1;X;X;X;X;X;X;X;X;X;X;X;X;X;X;X	XXXXXXXXXXXXXXXPPPPPPPPPPPPPXXX	S(1)ESFSISGVQPAR	S(39.26)ES(-39.26)FS(-79.54)IS(-100.03)GVQPAR	1	3	-0.13379	6932000	6932000	0	0	NaN	529	399	568	568	443	544	837	1888;1889	837	1889	25370	837	1889	25370	837	1889	25370
Q9UKY7	165	Q9UKY7	Protein CDV3 homolog	CDV3	0.866503	8.23785	3.48794e-57	122.39	107.13	122.39	1	T	PPAPVIVTETPEPAMTSGVYRPPGARLTTTR	X;X;X;X;X;X;X;X;X;X;X;X;X;X;X;GalT_UC1;X;X;X;X;X;X;X;X;X;X;X;X;X;X;X	PPPPPPPPPPPPPPPPPPPPPPPPPPXXXXX	TAPVQAPPAPVIVTET(0.003)PEPAMT(0.867)S(0.13)GVYRPPGAR	T(-98.64)APVQAPPAPVIVT(-39.08)ET(-24.09)PEPAMT(8.24)S(-8.24)GVYRPPGAR	22	4	0.026666	17739000	17739000	0	0	NaN	1107	401	165	165	549	682	1088	2522;2523;2524	1088	2524	62312	1088	2524	62312	1088	2524	62312
Q9ULJ3	447	Q9ULJ3	Zinc finger and BTB domain-containing protein 21	ZBTB21	1	92.0514	3.99133e-205	197.19	169.76	197.19	1	T	EPSSPLSDPSDIIRVTVGDAATTAAASSSSV	X;X;X;X;X;X;X;X;X;X;X;X;X;X;X;GalT_UC1;X;X;X;X;X;X;X;X;X;X;X;X;X;X;X	XXXXXXXXXXXXXXPPPPPPPPPPPPPPPPP	VT(1)VGDAATTAAASSSSVTR	VT(92.05)VGDAAT(-92.05)T(-109.54)AAAS(-161.53)S(-173.71)S(-180.79)S(-186.14)VT(-186.14)R	2	3	0.67116	12092000	12092000	0	0	NaN	1108	403	447	447	711	881	1368	3241;3242;3243	1368	3242	20767	1368	3242	20767	1368	3242	20767
Q9ULM3	604	Q9ULM3	YEATS domain-containing protein 2	YEATS2	0.999999	59.8852	2.23435e-137	161.51	142.22	161.51	1	T	VIIKQEPGEAPHVPATGAASQSPLPQYVTVK	X;X;X;X;X;X;X;X;X;X;X;X;X;X;X;GalT_UC1;X;X;X;X;X;X;X;X;X;X;X;X;X;X;X	XXXXPPPPPPPPPPPPPPPPPPPPPPPPPPP	QEPGEAPHVPAT(1)GAASQSPLPQYVTVK	QEPGEAPHVPAT(59.89)GAAS(-59.89)QS(-81.4)PLPQYVT(-122.12)VK	12	4	-0.11185	66686000	66686000	0	0	NaN	1110	404	604	604	404	492	757	1707	757	1707	43469	757	1707	43469	757	1707	43469
Q9ULT8	1350	Q9ULT8	E3 ubiquitin-protein ligase HECTD1	HECTD1	0.999934	41.8151	0	314.74	288.3	314.74	1	S	APGYDPDTVASPKPVSSTVSGTTQSWSSLVK	X;X;X;X;X;X;X;X;X;X;X;X;X;X;X;GalT_UC1;X;X;X;X;X;X;X;X;X;X;X;X;X;X;X	PPPPPPPPPPPPPPPPPPPPPPPPPPPPPPP	PVS(1)STVSGTTQSWSSLVK	PVS(41.82)S(-41.82)T(-81.37)VS(-153.53)GT(-174.88)T(-184.96)QS(-222.89)WS(-266.34)S(-278.27)LVK	3	3	0.31863	81223000	81223000	0	0	NaN	532	405	1350	1350	259;394	321;481	520;745	1188;1189;1686;1687;1688	745	1687	40340	745	1687	40340	745	1687	40340
Q9ULU4	750	Q9ULU4	Protein kinase C-binding protein 1	ZMYND8	0.9317	11.6741	8.61139e-167	181.26	154.85	176.32	1	T	EPSPKQDVVGKTPPSTTVGSHSPPETPVLTR	X;X;X;X;X;X;X;X;X;X;X;X;X;X;X;GalT_UC1;X;X;X;X;X;X;X;X;X;X;X;X;X;X;X	XXXXXXXXXXXPPPPPPPPPPPPPPPPPPPP	TPPS(0.063)T(0.932)T(0.005)VGSHSPPETPVLTR	T(-34.22)PPS(-11.67)T(11.67)T(-23.08)VGS(-65.94)HS(-103.87)PPET(-135.97)PVLT(-155.28)R	5	4	-0.25182	43446000	43446000	0	0	4.456	1114	406	750	750	596	741	1178	2784;2785;2786;2787;2788;2789	1178	2787	21264	1176	2777	20013	1176	2777	20013
Q9ULU4	751	Q9ULU4	Protein kinase C-binding protein 1	ZMYND8	0.917497	10.8975	8.61139e-167	181.26	154.85	170.11	1	T	PSPKQDVVGKTPPSTTVGSHSPPETPVLTRS	X;X;X;X;X;X;X;X;X;X;X;X;X;X;X;GalT_UC1;X;X;X;X;X;X;X;X;X;X;X;X;X;X;X	XXXXXXXXXXPPPPPPPPPPPPPPPPPPPPX	T(0.001)PPS(0.006)T(0.075)T(0.917)VGSHSPPETPVLTR	T(-28.02)PPS(-21.54)T(-10.9)T(10.9)VGS(-59.73)HS(-86.74)PPET(-122.36)PVLT(-139.98)R	6	4	-0.0016771	83430000	83430000	0	0	8.5568	1115	406	751	751	596	741	1177	2778;2779;2780;2781;2782;2783	1177	2779	19976	1176	2777	20013	1176	2777	20013
Q9ULU4	779	Q9ULU4	Protein kinase C-binding protein 1	ZMYND8	0.8948	9.95524	7.75415e-224	189.33	175.32	189.33	2	T	TRSSAQTSAAGATATTSTSSTVTVTAPAPAA	X;X;X;X;X;X;X;X;X;X;X;X;X;X;X;GalT_UC1;GalT_UC1;X;X;X;X;X;X;X;X;X;X;X;X;X;X	XXPPPPPPPPPPPPPPPPPPPPPPPPPPPPP	SSAQTSAAGAT(0.001)AT(0.099)T(0.895)S(0.975)T(0.022)S(0.004)S(0.004)TVTVTAPAPAATGSPVK	S(-82.82)S(-82.82)AQT(-74.42)S(-56.98)AAGAT(-29.33)AT(-9.96)T(9.96)S(19.73)T(-19.73)S(-29.33)S(-29.33)T(-47.96)VT(-65.8)VT(-98.42)APAPAAT(-152.76)GS(-159.41)PVK	14	4	-0.096017	94268000	0	94268000	0	NaN	1112	406	779	779	500;501	613;614;615	938	2147;2148	938	2148	27776	938	2148	27776	938	2148	27776
Q9ULU4	780	Q9ULU4	Protein kinase C-binding protein 1	ZMYND8	0.974719	19.7327	7.75415e-224	189.33	175.32	189.33	2	S	RSSAQTSAAGATATTSTSSTVTVTAPAPAAT	X;X;X;X;X;X;X;X;X;X;X;X;X;GalT_UC1;GalT_UC1;GalT_UC1;X;X;X;X;X;X;X;X;X;X;X;X;X;X;X	XPPPPPPPPPPPPPPPPPPPPPPPPPPPPPP	SSAQTSAAGAT(0.001)AT(0.099)T(0.895)S(0.975)T(0.022)S(0.004)S(0.004)TVTVTAPAPAATGSPVK	S(-82.82)S(-82.82)AQT(-74.42)S(-56.98)AAGAT(-29.33)AT(-9.96)T(9.96)S(19.73)T(-19.73)S(-29.33)S(-29.33)T(-47.96)VT(-65.8)VT(-98.42)APAPAAT(-152.76)GS(-159.41)PVK	15	4	-0.096017	94268000	0	94268000	0	NaN	533	406	780	780	500;501	613;614;615	938	2147;2148	938	2148	27776	938	2148	27776	938	2148	27776
Q9UNW1	244	Q9UNW1	Multiple inositol polyphosphate phosphatase 1	MINPP1	1	83.3966	5.18315e-07	83.397	67.857	83.397	1	T	FDHCEKFLTEVEKNATALYHVEAFKTGPEMQ	X;X;X;X;X;X;X;X;X;X;X;X;X;X;X;GalT_UC1;X;X;X;X;X;X;X;X;X;X;X;X;X;X;X	XXXXXXXXXXXXXPPPPPPPPPPPPXXXXXX	NAT(1)ALYHVEAFK	NAT(83.4)ALYHVEAFK	3	3	-0.47278	6887600	6887600	0	0	NaN	1116	407	244	244	325	399	623	1390	623	1390	20340	623	1390	20340	623	1390	20340
Q9UPN4	1082	Q9UPN4	Centrosomal protein of 131 kDa	CEP131	0.904328	9.78612	0.00960653	45.081	25.839	45.081	1	T	HLEELLEQHRRPTPSTK______________	X;X;X;X;X;X;X;X;X;X;X;X;X;X;X;GalT_UC1;X;X;X;X;X;X;X;X;X;X;X;X;X;X;X	XXXXXXXXXXPPPPPPPXXXXXXXXXXXXXX	RPT(0.001)PS(0.095)T(0.904)K	RPT(-31.28)PS(-9.79)T(9.79)K	6	3	-0.41434	3783900	3783900	0	0	NaN	1117	408	1082	1082	433	528	805	1816	805	1816	1228	805	1816	1228	805	1816	1228
Q9UPN6	615	Q9UPN6	Protein SCAF8	SCAF8	0.931209	11.6741	3.76927e-146	176.32	142.53	176.32	1	T	ETVKSSEPVKETVQTTQSPTPVEKETVVTTQ	X;X;X;X;X;X;X;X;X;X;X;X;X;X;X;GalT_UC1;X;X;X;X;X;X;X;X;X;X;X;X;X;X;X	XXXXPPPPPPPPPPPPPPPPPPPPXXXXXXX	SSEPVKETVQT(0.063)T(0.931)QS(0.005)PT(0.001)PVEK	S(-103.87)S(-94.89)EPVKET(-65.94)VQT(-11.67)T(11.67)QS(-23.08)PT(-30.25)PVEK	12	4	-0.31117	85468000	85468000	0	0	7.146	1118	409	615	615	119;503	147;617	237;942	590;591;592;593;2156;2157	942	2157	11418	942	2157	11418	942	2157	11418
Q9UPN6	821	Q9UPN6	Protein SCAF8	SCAF8	0.998383	27.9194	1.51611e-56	141.1	105.62	141.1	1	S	VTSNSGILGVQRPNVSSNSEILGVRPSNVSS	X;X;X;X;X;X;X;X;X;X;X;X;X;X;X;GalT_UC1;X;X;X;X;X;X;X;X;X;X;X;X;X;X;X	XXXXXXXXXXXXPPPPPPPPPPPPPXXXXXX	PNVS(0.998)S(0.002)NSEILGVR	PNVS(27.92)S(-27.92)NS(-52.94)EILGVR	4	3	-0.2988	19764000	19764000	0	0	NaN	536	409	821	821	371	452	705	1582;1583	705	1583	20736	705	1583	20736	705	1583	20736
Q9UPN9	634	Q9UPN9	E3 ubiquitin-protein ligase TRIM33	TRIM33	0.940245	13.2896	6.24267e-17	80.117	66.797	80.117	1	S	RQHSNPGHAGPFPVVSVHNTTINPTSPTTAT	X;X;X;X;X;X;X;X;X;X;X;X;X;X;X;GalT_UC1;X;X;X;X;X;X;X;X;X;X;X;X;X;X;X	XPPPPPPPPPPPPPPPPPPPPPPPPPPPPPP	QHS(0.003)NPGHAGPFPVVS(0.94)VHNT(0.044)T(0.01)INPT(0.003)SPTTATMANANR	QHS(-25.65)NPGHAGPFPVVS(13.29)VHNT(-13.29)T(-19.59)INPT(-25.65)S(-37.01)PT(-44.87)T(-55.28)AT(-64.13)MANANR	15	4	0.72723	25309000	25309000	0	0	NaN	539	410	634	634	408	496	762	1716;1717	762	1717	35770	762	1717	35770	762	1717	35770
Q9UQ35	119	Q9UQ35	Serine/arginine repetitive matrix protein 2	SRRM2	0.897433	9.60516	0.00110803	53.403	31.804	53.403	1	T	NPGGKEETPGQRPAVTETHQLAELNEKKNER	X;X;X;X;X;X;X;X;X;X;X;X;X;X;X;GalT_UC1;X;X;X;X;X;X;X;X;X;X;X;X;X;X;X	XXXXXPPPPPPPPPPPPPPPPPPPPPPXXXX	EET(0.098)PGQRPAVT(0.897)ET(0.004)HQLAELNEK	EET(-9.61)PGQRPAVT(9.61)ET(-23.21)HQLAELNEK	11	5	-0.17936	6334500	6334500	0	0	NaN	1119	411	119	119	99	125	202	501	202	501	19491	202	501	19491	202	501	19491
Q9UQ35	2388	Q9UQ35	Serine/arginine repetitive matrix protein 2	SRRM2	1	45.7179	0.0148961	45.718	28.392	45.718	1	S	PALSGANLTSPRVPLSAYERVSGRTSPPLLD	X;X;X;X;X;X;X;X;X;X;X;X;X;X;X;GalT_UC1;X;X;X;X;X;X;X;X;X;X;X;X;X;X;X	XXXXXXXXXXXXPPPPPPPPXXXXXXXXXXX	VPLS(1)AYER	VPLS(45.72)AYER	4	3	-0.11977	6005400	6005400	0	0	NaN	540	411	2388	2388	682	848	1330	3150	1330	3150	10572	1330	3150	10572	1330	3150	10572
Q9Y2X9	61	Q9Y2X9	Zinc finger protein 281	ZNF281	0.989575	19.8564	0.00248877	65.224	41.238	65.224	1	T	FPQGMVMFNHRLPPVTSFTRPAGSAAPPPQC	X;X;X;X;X;X;X;X;X;X;X;X;X;X;X;GalT_UC1;X;X;X;X;X;X;X;X;X;X;X;X;X;X;X	XXXXXXXXXXXPPPPPPPPPXXXXXXXXXXX	LPPVT(0.99)S(0.01)FTR	LPPVT(19.86)S(-19.86)FT(-37.02)R	5	3	0.059325	7897700	7897700	0	0	NaN	1120	412	61	61	288	353	561	1280	561	1280	26463	561	1280	26463	561	1280	26463
Q9Y3S1	1605	Q9Y3S1	Serine/threonine-protein kinase WNK2	WNK2	0.923842	11.1971	0	245.96	224.19	245.96	1	S	DEKLRTLLYQEHVPTSSASAGTPVEVGDRDF	X;X;X;X;X;X;X;X;X;X;X;X;X;X;X;GalT_UC1;X;X;X;X;X;X;X;X;X;X;X;X;X;X;X	XXXXXPPPPPPPPPPPPPPPPPPPPPPPPXX	TLLYQEHVPT(0.07)S(0.924)S(0.006)ASAGTPVEVGDR	T(-113.83)LLYQEHVPT(-11.2)S(11.2)S(-22.2)AS(-33.01)AGT(-54.04)PVEVGDR	11	4	-0.22566	101450000	101450000	0	0	NaN	541	413	1605	1605	580	723	1154;1155	2720;2721;2722;2723	1154	2721	37782	1154	2721	37782	1154	2721	37782
Q9Y520	2211	Q9Y520	Protein PRRC2C	PRRC2C	0.949341	12.7276	0.000118508	45.094	42.586	45.094	1	T	SLPNTVATNNTKMEDTLVNNVPLPNTLPLPK	X;X;X;X;X;X;X;X;X;X;X;X;X;X;X;GalT_UC1;X;X;X;X;X;X;X;X;X;X;X;X;X;X;X	XXXXXXXXXXXXPPPPPPPPPPPPPPPPPPP	MEDT(0.949)LVNNVPLPNT(0.051)LPLPK	MEDT(12.73)LVNNVPLPNT(-12.73)LPLPK	4	3	-0.12199	4487000	4487000	0	0	NaN	1130	417	2211	2211	312	384	603	1355	603	1355	74813	603	1355	74813	603	1355	74813
Q9Y520	2243	Q9Y520	Protein PRRC2C	PRRC2C	0.955459	13.3147	0	256.35	241.66	256.35	1	T	ETIQQSSSLTSVPPTTFSLTFKMESARKAWE	X;X;X;X;X;X;X;X;X;X;X;X;X;X;X;GalT_UC1;X;X;X;X;X;X;X;X;X;X;X;X;X;X;X	PPPPPPPPPPPPPPPPPPPPPPXXXXXXXXX	RETIQQSSSLTSVPPT(0.045)T(0.955)FSLTFK	RET(-168.67)IQQS(-117.27)S(-107.83)S(-88.3)LT(-78.21)S(-67.91)VPPT(-13.31)T(13.31)FS(-57.4)LT(-98.18)FK	17	4	-0.03969	189820000	189820000	0	0	18.099	1128	417	2243	2243	117;430	145;523;525	234;797	570;571;572;573;574;575;576;577;578;579;1794;1795;1796;1797;1798;1799;1800;1801;1802;1803	797	1801	57226	797	1801	57226	797	1801	57226
Q9Y520	2469	Q9Y520	Protein PRRC2C	PRRC2C	1	83.7334	4.75137e-224	190.24	162.75	190.24	1	S	SQAQELFSSSLQPYRSQPAFMQSSLSQPSVV	X;X;X;X;X;X;X;X;X;X;X;X;X;X;X;GalT_UC1;X;X;X;X;X;X;X;X;X;X;X;X;X;X;X	XXXXXXXXXXXXXXXPPPPPPPPPPPPPPPP	S(1)QPAFMQSSLSQPSVVLSGTAIHNFPTVQHQELAK	S(83.73)QPAFMQS(-83.73)S(-107.59)LS(-129.25)QPS(-154.18)VVLS(-165.44)GT(-173.49)AIHNFPT(-181.29)VQHQELAK	1	5	-0.048366	19385000	19385000	0	0	NaN	552	417	2469	2469	492	602	923	2119;2120	923	2120	68524	923	2120	68524	923	2120	68524
Q9Y520	2691	Q9Y520	Protein PRRC2C	PRRC2C	0.787733	7.26868	1.17244e-12	96.171	71.064	61.097	1	T	IAGRSTTPTSSPFRATSTSPNSQSSKMNSIV	X;X;X;X;GalT_UC1;X;X;X;X;X;X;X;X;X;X;GalT_UC1;X;X;X;X;X;X;X;X;X;X;X;X;X;X;X	XXXXXXXXXXXXXXPPPPPPPPPPPPXXXXX	AT(0.788)S(0.148)T(0.023)S(0.023)PNS(0.017)QSS(0.002)K	AT(7.27)S(-7.27)T(-15.37)S(-15.37)PNS(-16.64)QS(-35.66)S(-27.14)K	2	2	-0.26016	2690900	2690900	0	0	NaN	1125	417	2691	2691	60	81	140	389;390	140	390	1835	139	387	1846	139	387	1846
Q9Y618	1997	Q9Y618	Nuclear receptor corepressor 2	NCOR2	0.999994	52.4083	5.34751e-30	111.52	85.378	111.52	1	S	SPSKGSEPRPLVPPVSGHATIARTPAKNLAP	X;X;X;X;X;X;X;X;X;X;X;X;X;X;X;GalT_UC1;X;X;X;X;X;X;X;X;X;X;X;X;X;X;X	XXXXXXXXXPPPPPPPPPPPPPPXXXXXXXX	PLVPPVS(1)GHATIAR	PLVPPVS(52.41)GHAT(-52.41)IAR	7	4	0.13446	29642000	29642000	0	0	NaN	554	418	1997	1997	369	450	702;703	1577;1578;1579	702	1578	19443	702	1578	19443	702	1578	19443
Q9Y618	2142	Q9Y618	Nuclear receptor corepressor 2	NCOR2	1	74.0411	1.21754e-47	126.56	116.22	126.56	1	T	LLQTAPGVKGHQRVVTLAQHISEVITQDYTR	X;X;X;X;X;X;X;X;X;X;X;X;X;X;X;GalT_UC1;X;X;X;X;X;X;X;X;X;X;X;X;X;X;X	XXXXXXXXXXXXXPPPPPPPPPPPPPPPPPP	VVT(1)LAQHISEVITQDYTR	VVT(74.04)LAQHIS(-74.04)EVIT(-108.55)QDYT(-122.6)R	3	4	-0.065656	18175000	18175000	0	0	NaN	1133	418	2142	2142	716	887	1380	3278	1380	3278	52488	1380	3278	52488	1380	3278	52488
Q9Y6Y8	118	Q9Y6Y8	SEC23-interacting protein	SEC23IP	0.94822	14.1081	2.1827e-158	177.67	151.8	49.287	1	T	TAATSVGQSGFPKPLTALPFTTGSQDVSNAF	X;X;X;X;X;X;X;X;X;X;X;X;X;X;X;GalT_UC1;X;X;X;X;X;X;X;X;X;X;X;X;X;X;X	XXXXXXXXXXXXXPPPPPPPPPPPPPPPPPP	PLT(0.948)ALPFT(0.037)T(0.011)GS(0.003)QDVSNAFSPSISK	PLT(14.11)ALPFT(-14.11)T(-19.37)GS(-24.36)QDVS(-33.39)NAFS(-43.83)PS(-46.22)IS(-46.09)K	3	3	0.4405	25670000	25670000	0	0	2.0672	1134	419	118	118	368	447;448	697;698	1560;1561;1562;1563;1564	698	1564	74829	697	1563	74257	697	1563	74257
Q9Y6Y8	123	Q9Y6Y8	SEC23-interacting protein	SEC23IP	0.996754	25.4314	0	232.74	218.05	124.84	1;2	T	VGQSGFPKPLTALPFTTGSQDVSNAFSPSIS	X;X;X;X;X;X;X;X;X;X;X;X;X;X;X;GalT_UC1;GalT_UC1;X;X;X;X;X;X;X;X;X;X;X;X;X;X	XXXXXXXXPPPPPPPPPPPPPPPPPPPPPPP	PLT(0.019)ALPFT(0.997)T(0.979)GS(0.006)QDVSNAFSPSISK	PLT(-17.19)ALPFT(25.43)T(17.19)GS(-25.43)QDVS(-54.37)NAFS(-88.25)PS(-88.25)IS(-88.25)K	8	3	0.59026	543880000	397020000	146860000	0	43.799	1135	419	123	123	368	447;448	692;693;696	1547;1548;1556;1557;1558;1559	692	1547	58566	695	1551	73107	695	1551	73107
Q9Y6Y8	124	Q9Y6Y8	SEC23-interacting protein	SEC23IP	0.978569	17.1897	0	232.74	218.05	124.84	2	T	GQSGFPKPLTALPFTTGSQDVSNAFSPSISK	X;X;X;X;X;X;X;X;X;X;X;X;X;X;GalT_UC1;GalT_UC1;X;X;X;X;X;X;X;X;X;X;X;X;X;GalT_UC1;X	XXXXXXXPPPPPPPPPPPPPPPPPPPPPPPP	PLT(0.019)ALPFT(0.997)T(0.979)GS(0.006)QDVSNAFSPSISK	PLT(-17.19)ALPFT(25.43)T(17.19)GS(-25.43)QDVS(-54.37)NAFS(-88.25)PS(-88.25)IS(-88.25)K	9	3	0.59026	158090000	0	158090000	0	12.731	1136	419	124	124	368	447;448	692;693;694	1547;1548;1549	692	1547	58566	695	1551	73107	695	1551	73107
Q9Y6Y8	138	Q9Y6Y8	SEC23-interacting protein	SEC23IP	0.976565	16.9634	1.86217e-83	140.89	131.4	86.727	1;2	S	TTGSQDVSNAFSPSISKAQPGAPPSSLMGIN	X;GalT_UC1;X;X;X;X;X;X;X;X;X;X;X;X;X;GalT_UC1;X;X;X;X;X;X;X;X;X;X;X;X;X;X;X	PPPPPPPPPPPPPPPPPXXXXXXXXXXXXXX	PLTALPFT(0.108)T(0.784)GS(0.108)QDVSNAFS(0.003)PS(0.02)IS(0.977)K	PLT(-32.61)ALPFT(-8.64)T(8.64)GS(-8.64)QDVS(-39.18)NAFS(-25.45)PS(-16.96)IS(16.96)K	23	4	-0.17179	133670000	122440000	11228000	0	10.765	556	419	138	138	368	447;448	694;699;700	1549;1565;1566;1567;1568;1569;1570;1571;1572;1573;1574;1575	694	1549	62286	700	1573	75903	700	1573	75903
U3KPZ7;Q9P2N5	386;386	U3KPZ7	RNA-binding protein 27	RBM27	1	63.6759	2.54392e-122	176.09	139.8	176.09	1	T	QPPPSVVLPIPRPPITQSSLINSRDQPGTSA	X;X;X;X;X;X;X;X;X;X;X;X;X;X;X;GalT_UC1;X;X;X;X;X;X;X;X;X;X;X;X;X;X;X	XXXXXXXXXXXXPPPPPPPPPPPPXXXXXXX	PPIT(1)QSSLINSR	PPIT(63.68)QS(-63.68)S(-85.49)LINS(-151.85)R	4	3	0.29565	10450000	10450000	0	0	NaN	1143	428	386	386	372	453	706	1584	706	1584	19387	706	1584	19387	706	1584	19387
U3KPZ7;Q9P2N5	407;407	U3KPZ7	RNA-binding protein 27	RBM27	0.999783	36.6264	1.03792e-116	164.64	146.18	164.64	1	S	NSRDQPGTSAVPNLASVGTRLPPPLPQNLLY	X;X;X;X;X;X;X;X;X;X;X;X;X;X;X;GalT_UC1;X;X;X;X;X;X;X;X;X;X;X;X;X;X;X	XXXPPPPPPPPPPPPPPPPPXXXXXXXXXXX	DQPGTSAVPNLAS(1)VGTR	DQPGT(-97.51)S(-88.88)AVPNLAS(36.63)VGT(-36.63)R	13	3	-0.46943	22044000	22044000	0	0	NaN	562	428	407	407	88	111	178	453;454	178	454	36916	178	454	36916	178	454	36916
U3KPZ7;Q9P2N5	467;522	U3KPZ7	RNA-binding protein 27	RBM27	0.789731	5.74705	5.96331e-109	159.13	148.09	159.13	1	T	FFSRTQTQRPNLIGLTSGDMDVNPRAANIVI	X;X;X;X;X;X;X;X;X;X;X;X;X;X;X;GalT_UC1;X;X;X;X;X;X;X;X;X;X;X;X;X;X;X	XXXXPPPPPPPPPPPPPPPPPPPPPXXXXXX	TQTQRPNLIGLT(0.79)S(0.21)GDMDVNPR	T(-99.03)QT(-84.98)QRPNLIGLT(5.75)S(-5.75)GDMDVNPR	12	4	-0.39811	12488000	12488000	0	0	NaN	1144	428	467	467	608	756	1197	2835;2836	1197	2835	39534	1197	2835	39534	1197	2835	39534
U3KPZ7;Q9P2N5	484;539	U3KPZ7	RNA-binding protein 27	RBM27	0.998743	31.8477	1.49176e-19	87.772	75.487	84.166	1	T	GDMDVNPRAANIVIQTEPPVPVSINSNITRV	X;X;X;X;X;X;X;X;X;X;X;X;X;X;X;GalT_UC1;X;X;X;X;X;X;X;X;X;X;X;X;X;X;X	XXXXXXXXPPPPPPPPPPPPPPPPPPPPPPX	AANIVIQT(0.999)EPPVPVS(0.001)INSNIT(0.001)R	AANIVIQT(31.85)EPPVPVS(-32.29)INS(-48.17)NIT(-31.85)R	8	4	-0.037242	423160000	423160000	0	0	23.066	1142	428	484	484	3	3	3;4	3;4;5;6;7;8;9;10;11	3	3	64846	4	8	64886	4	8	64886
U3KPZ7;Q9P2N5	683;738	U3KPZ7	RNA-binding protein 27	RBM27	0.994924	22.9272	5.12265e-38	121.5	99.271	80.763	1	S	TVHGGIQKMMSKPQTSGAYVLNKVPVKHRLG	X;X;X;X;X;X;X;X;X;X;X;X;X;X;X;GalT_UC1;X;X;X;X;X;X;X;X;X;X;X;X;X;X;X	XXXXXXXXPPPPPPPPPPPPPPPXXXXXXXX	MMSKPQT(0.005)S(0.995)GAYVLNK	MMS(-52.44)KPQT(-22.93)S(22.93)GAYVLNK	8	4	-0.569	15942000	15942000	0	0	NaN	564	428	683	683	315	387	607;608	1362;1363	608	1363	12385	607	1362	12282	607	1362	12282
Replicate 1 (Heavy)
Proteins	Positions within proteins	Protein	Protein names	Gene names	Localization prob	Score diff	PEP	Score	Delta score	Score for localization	Number of GalT_UC2	Amino acid	Sequence window	Modification window	Peptide window coverage	GalT_UC2 Probabilities	GalT_UC2 Score diffs	Position in peptide	Charge	Mass error [ppm]	Intensity	Intensity___1	Intensity___2	Intensity___3	Ratio mod/base	id	Protein group IDs	Positions	Position	Peptide IDs	Mod. peptide IDs	Evidence IDs	MS/MS IDs	Best localization evidence ID	Best localization MS/MS ID	Best localization scan number	Best score evidence ID	Best score MS/MS ID	Best score scan number	Best PEP evidence ID	Best PEP MS/MS ID	Best PEP scan number
A0A0B4J203;Q6UN15	205;205	A0A0B4J203	Pre-mRNA 3'-end-processing factor FIP1	FIP1L1	0.997266	25.6397	3.24525e-206	177.7	154.02	177.7	1	T	EKQKRIRMGLEVIPVTSTTNKITAEDCTMEV	X;X;X;X;X;X;X;X;X;X;X;X;X;X;X;GalT_UC2;X;X;X;X;X;X;X;X;X;X;X;X;X;X;X	XXXXXXXPPPPPPPPPPPPPPXXXXXXXXXX	MGLEVIPVT(0.997)S(0.003)TTNK	MGLEVIPVT(25.64)S(-25.64)T(-49.1)T(-68.04)NK	9	3	-0.41483	23288000	23288000	0	0	NaN	652	1	205	205	360	437	655	1365;1366;1367	655	1366	40947	655	1366	40947	655	1366	40947
A0A0B4J203;Q6UN15	253;253	A0A0B4J203	Pre-mRNA 3'-end-processing factor FIP1	FIP1L1	0.941227	12.1303	0.00719167	60.436	29.7	52.482	1	T	QGRTGNSEKETALPSTKAEFTSPPSLFKTGL	X;X;X;X;X;X;X;X;X;X;X;X;X;X;X;GalT_UC2;X;X;X;X;X;X;X;X;X;X;X;X;X;X;X	XXXXXXXXXPPPPPPPPXXXXXXXXXXXXXX	ET(0.001)ALPS(0.058)T(0.941)K	ET(-29.16)ALPS(-12.13)T(12.13)K	7	2	-0.17852	1845300000	1845300000	0	0	NaN	651	1	253	253	129	156	231;232	471;472;473	231	471	7536	232	472	7651	232	472	7651
A0A0C4DFX4;Q6ZRS2	2229;2406	A0A0C4DFX4	Helicase SRCAP	SRCAP	0.999722	35.5593	3.97e-14	79.514	71.139	79.514	1	T	PGTRVSERLRGARAETQGANHTPVISAHQTR	X;X;X;X;X;X;X;X;X;X;X;X;X;X;X;GalT_UC2;X;X;X;X;X;X;X;X;X;X;X;X;X;X;X	XXXXXXXXXXXXXPPPPPPPPPPPPPPPPPP	AET(1)QGANHTPVISAHQTR	AET(35.56)QGANHT(-35.56)PVIS(-63.28)AHQT(-76.84)R	3	3	-0.03128	52892000	52892000	0	0	NaN	653	3	2229	2229	13	16	25	60	25	60	7226	25	60	7226	25	60	7226
A0AV96	523	A0AV96	RNA-binding protein 47	RBM47	0.940668	12.0015	1.1009e-138	155.98	136.9	155.98	1	T	STPPPFQGRPITPVYTVAPNVQRIPTAGIYG	X;X;X;X;X;X;X;X;X;X;X;X;X;X;X;GalT_UC2;X;X;X;X;X;X;X;X;X;X;X;X;X;X;X	XXXXXXXXXPPPPPPPPPPPPPPXXXXXXXX	PIT(0.059)PVYT(0.941)VAPNVQR	PIT(-12)PVYT(12)VAPNVQR	7	3	0.045208	97911000	97911000	0	0	NaN	655	6	523	523	427	513	750	1525;1526;1527;1528	750	1526	32502	750	1526	32502	750	1526	32502
A0AVK6	681	A0AVK6	Transcription factor E2F8	E2F8	0.998778	28.6888	1.59e-298	190.37	171.81	190.37	2	T	NHRIYSSPIAGVIPVTSSELTAVNFPSFHVT	X;X;X;X;X;X;X;X;X;X;X;X;X;X;X;GalT_UC2;GalT_UC2;X;X;X;X;X;X;X;X;X;X;X;X;X;X	XXXPPPPPPPPPPPPPPPPPPPPPPPPPPPP	IYSSPIAGVIPVT(0.999)S(0.904)S(0.097)ELTAVNFPSFHVTPLK	IYS(-74.66)S(-65.89)PIAGVIPVT(28.69)S(9.74)S(-9.74)ELT(-53.81)AVNFPS(-121.48)FHVT(-128.77)PLK	13	5	-0.054523	30063000	0	30063000	0	NaN	656	7	681	681	270	326	495	1072;1073	495	1072	83936	495	1072	83936	495	1072	83936
A0AVK6	682	A0AVK6	Transcription factor E2F8	E2F8	0.904174	9.74201	1.59e-298	190.37	171.81	190.37	2	S	HRIYSSPIAGVIPVTSSELTAVNFPSFHVTP	X;X;X;X;X;X;X;X;X;X;X;X;X;X;GalT_UC2;GalT_UC2;X;X;X;X;X;X;X;X;X;X;X;X;X;X;X	XXPPPPPPPPPPPPPPPPPPPPPPPPPPPPP	IYSSPIAGVIPVT(0.999)S(0.904)S(0.097)ELTAVNFPSFHVTPLK	IYS(-74.66)S(-65.89)PIAGVIPVT(28.69)S(9.74)S(-9.74)ELT(-53.81)AVNFPS(-121.48)FHVT(-128.77)PLK	14	5	-0.054523	30063000	0	30063000	0	NaN	1	7	682	682	270	326	495	1072;1073	495	1072	83936	495	1072	83936	495	1072	83936
A3KN83	126	A3KN83	Protein strawberry notch homolog 1	SBNO1	0.999676	34.8899	0	243.4	227.52	243.4	1;2	T	VTTNRQTITLTKFIQTTASTRPSVSAPTVRN	X;GalT_UC2;X;X;X;X;X;X;X;X;X;X;X;X;X;GalT_UC2;X;X;GalT_UC2;X;X;X;X;X;X;X;X;X;X;X;X	XXXXXXXXXXXXPPPPPPPPPPPPPPPPPPX	FIQT(1)TASTRPSVSAPTVR	FIQT(34.89)T(-34.89)AS(-88.02)T(-111.09)RPS(-167.92)VS(-187.28)APT(-204.14)VR	4	4	-0.13835	270060000	156220000	113850000	0	NaN	657	10	126	126	146;147	177;178;179	266;267;268;269	575;576;577;578;579;580;581;582	269	580	21860	269	580	21860	269	580	21860
A3KN83	130	A3KN83	Protein strawberry notch homolog 1	SBNO1	0.988594	20.3776	1.72425e-168	162.48	136.37	162.48	1;2	T	RQTITLTKFIQTTASTRPSVSAPTVRNAMTS	X;X;X;X;X;X;X;X;X;X;X;X;X;X;X;GalT_UC2;X;X;X;X;X;X;X;X;X;X;X;X;X;X;X	XXXXXXXXPPPPPPPPPPPPPPPPPPXXXXX	FIQTTAS(0.009)T(0.989)RPS(0.002)VSAPTVR	FIQT(-39.7)T(-42.52)AS(-20.38)T(20.38)RPS(-26.57)VS(-53.82)APT(-70.64)VR	8	4	0.023975	171340000	99560000	71782000	0	NaN	658	10	130	130	146;147	177;178;179	267;270	576;577;583;584	270	584	22924	270	584	22924	270	584	22924
A5YKK6	1038	A5YKK6	CCR4-NOT transcription complex subunit 1	CNOT1	0.976848	18.5167	4.90082e-198	165.7	149.2	76.588	3	T	QAQVPAKAPLAGQVSTMVTTSTTTTVAKTVT	X;X;X;X;X;X;X;X;X;X;X;X;X;X;X;GalT_UC2;X;X;GalT_UC2;GalT_UC2;X;X;X;X;GalT_UC2;X;X;X;GalT_UC2;X;X	XXXXXXXPPPPPPPPPPPPPPPPPPPPPXXX	APLAGQVS(0.02)T(0.977)MVT(0.425)T(0.425)S(0.09)T(0.273)T(0.075)T(0.075)T(0.639)VAK	APLAGQVS(-18.52)T(18.52)MVT(0)T(0)S(-9.47)T(-3.82)T(-9.47)T(-9.47)T(3.82)VAK	9	5	-0.10046	142650000	0	0	142650000	NaN	660	12	1038	1038	33	36;37	50;51;52	107;108;109;110	52	110	20231	51	108	19262	51	108	19262
A5YKK6	1041	A5YKK6	CCR4-NOT transcription complex subunit 1	CNOT1	0.999963	47.3306	4.90082e-198	165.7	149.2	165.7	2;3	T	VPAKAPLAGQVSTMVTTSTTTTVAKTVTVTR	X;X;X;X;X;X;X;X;X;X;X;GalT_UC2;GalT_UC2;X;X;GalT_UC2;GalT_UC2;X;X;X;X;GalT_UC2;X;X;X;GalT_UC2;X;X;X;X;X	XXXXPPPPPPPPPPPPPPPPPPPPPXXXXXX	APLAGQVS(0.055)T(0.945)MVT(1)T(0.996)S(0.004)TTTTVAK	APLAGQVS(-12.32)T(12.32)MVT(47.33)T(24.32)S(-24.32)T(-47.33)T(-58.33)T(-79.23)T(-68.96)VAK	12	4	-0.17834	194520000	0	115860000	78657000	NaN	661	12	1041	1041	33	36;37	50;51;53	107;108;111;112;113	51	108	19262	51	108	19262	51	108	19262
[truncated: 3,175 more rows]
